# Supplementary material for: Comparison of Bioinformatics Pipelines and Operating Systems for the Analyses of 16S rRNA Gene Amplicon Sequences in Human Fecal Samples
Source: PubMed Central journal article supplement (PMC7318847; doi:10.3389/fmicb.2020.01262), 2020-06-17

## *Supplementary Material*

**Supplementary Methods 1. QIIME2 command line.** The same version (2018.8) and the same commands were used on Linux and Mac OS. (.txt)

**Supplementary Methods 2. Bioconductor command line.** The same version (<https://f1000research.com/articles/5-1492/v2>, 29 OCT 2018) and the same commands were used on Linux and Mac OS. (.txt)

**Supplementary Methods 3. UPARSE command line.** The same version (11.0.667) and the same commands were used on Linux and Mac OS. (.txt)

**Supplementary Methods 4. Mothur command line.** The same version (1.43.0) and the same commands were used on Linux and Mac OS. (.txt)

**Supplementary Methods 5. Command line used to customize the SILVA (version 132) and RDP (version 16) reference database (version 132) in QIIME2** (<https://docs.qiime2.org/2018.8/tutorials/feature-classifier/>). The same version (2018.8) and the same commands were used on Linux and Mac OS. (.txt)

**Supplementary Methods 6. Command line used to customize the SILVA (version 132)** (<https://blog.mothur.org/2016/07/07/Customization-for-your-region/>) **and RDP (version 16)** ([https://mothur.org/blog/2017/RDP-v16-reference\\_files/](https://mothur.org/blog/2017/RDP-v16-reference_files/)) **reference databases in mothur.** The same version (1.43.0) and the same commands were used on Linux and Mac OS. (.txt)

**Supplementary Table 1. Processed databases.** Taxonomic assignment and number of reads as processed by using QIIME2, Bioconductor, UPARSE, or mothur. (.xlsx)

**Supplementary Figure 1. Comparison of the relative abundance of phyla obtained by using QIIME2, Bioconductor, UPARSE, or mothur after clustering OTUs at 99%.** P values were calculated using Friedman test followed by Dunn's multiple comparisons test. Wilcoxon signed rank test was applied when only 2 pipelines were compared.

**Supplementary Figure 2. Comparison of the relative abundance of genera obtained by using QIIME2, Bioconductor, UPARSE, or mothur after clustering OTUs at 99%.** P values were calculated using Friedman test followed by Dunn's multiple comparisons test. Wilcoxon signed rank test was applied when only 2 pipelines were compared.

**Supplementary Figure 3. Comparison of the relative abundance of genera obtained by using QIIME2, Bioconductor, UPARSE, or mothur after clustering OTUs at 97% and by applying the RDP database (version 16).** P values were calculated using Friedman test followed by Dunn's multiple comparisons test. Wilcoxon signed rank test was applied when only 2 pipelines were compared.

**Supplementary Figure 4. Alpha (A) and beta diversity (B-C) measures in QIIME2, Bioconductor, UPARSE or mothur.** Beta diversity metrics were computed using normalized data except for UPARSE, where they have not been calculated as the free 32-bit version of USEARCH did not allocate enough memory for the analysis. Only one mothur workflow is shown for beta diversity.

P values for Shannon index analysis were calculated using Friedman test followed by Dunn's multiple comparisons test.

**Supplementary Methods 1. QIIME2 command line.** The same version (2018.8) and the same commands were used on Linux and Mac OS.

# Processing performed on cognitively intact persons (here indicated as Healthy Controls, HC) sequencing run

```
qiime tools import --type SampleData[PairedEndSequencesWithQuality] --input-path
manifest_HC.csv --output-path paired-end-demux_HC.qza --input-format
PairedEndFastqManifestPhred33
```

```
qiime demux summarize --i-data paired-end-demux_HC.qza --o-visualization paired-end-
demux_HC.qzv
```

```
qiime tools view paired-end-demux_HC.qzv
```

```
qiime dada2 denoise-paired --i-demultiplexed-seqs paired-end-demux_HC.qza --p-trim-left-f 17 --p-
trunc-len-f 290 --p-trim-left-r 21 --p-trunc-len-r 220 --p-n-threads 0 --output-dir dada2_HC --o-
representative-sequences rep-seqs-dada2_HC.qza --o-table table-dada2_HC.qza
```

# Processing performed on beta amyloid positive AD patients (ABpos) sequencing run

```
qiime tools import --type SampleData[PairedEndSequencesWithQuality] --input-path
manifest_ABpos.csv --output-path paired-end-demux_ABpos.qza --input-format
PairedEndFastqManifestPhred33
```

```
qiime demux summarize --i-data paired-end-demux_ABpos.qza --o-visualization paired-end-
demux_ABpos.qzv
```

```
qiime tools view paired-end-demux_ABpos.qzv
```

```
qiime dada2 denoise-paired --i-demultiplexed-seqs paired-end-demux_ABpos.qza --p-trim-left-f 17 -
-p-trunc-len-f 290 --p-trim-left-r 21 --p-trunc-len-r 220 --p-n-threads 0 --output-dir dada2_ABpos --
o-representative-sequences rep-seqs-dada2_ABpos.qza --o-table table-dada2_ABpos.qza
```

# Merging tables and sequences

```
qiime feature-table merge --i-tables table-dada2_HC.qza --i-tables table-dada2_ABpos.qza --o-
merged-table table-dada2_all.qza
```

```
qiime feature-table merge-seqs --i-data rep-seqs-dada2_HC.qza --i-data rep-seqs-dada2_ABpos.qza --
o-merged-data rep-seqs-dada2_all.qza
```

```
qiime feature-table summarize --i-table table-dada2_all.qza --o-visualization table-dada2_all.qzv --m-
sample-metadata-file sample-metadata.tsv
```

```
qiime feature-table tabulate-seqs --i-data rep-seqs-dada2_all.qza --o-visualization rep-seqs-
dada2_all.qzv
```

```
qiime feature-classifier classify-sklearn --i-classifier /silva-V3V4-classifier.qza --i-reads rep-seqs-
dada2_all.qza --o-classification taxonomy.qza
```

```
qiime metadata tabulate --m-input-file taxonomy.qza --o-visualization taxonomy.qzv
```

```
qiime taxa barplot --i-table table-dada2_all.qza --i-taxonomy taxonomy.qza --m-metadata-file
sample-metadata.tsv --o-visualization taxa-bar-plots.qzv
```

**Supplementary Methods 2. Bioconductor command line.** The same version

(<https://f1000research.com/articles/5-1492/v2>, 29 OCT 2018) and the same commands were used on Linux and Mac OS.

```
set.seed(100)
```

```
# Processing performed on HC sequencing run
```

```
fns_HC <- sort(list.files(miseq_path, full.names = TRUE))
```

```
fnFs_HC <- fns_HC[grepl("R1", fns_HC)]
```

```

fnRs_HC <- fns_HC[grepl("R2", fns_HC)]
plotQualityProfile(fnFs_HC[1:3])
plotQualityProfile(fnRs_HC[1:3])
if(!file_test("-d", filt_path)) dir.create(filt_path)
filtFs_HC <- file.path(filt_path, basename(fnFs_HC))
filtRs_HC <- file.path(filt_path, basename(fnRs_HC))
for(i in seq_along(fnFs_HC)) {
  fastqPairedFilter(c(fnFs_HC[[i]], fnRs_HC[[i]]),
                   c(filtFs_HC[[i]], filtRs_HC[[i]]),
                   truncLen=c(290,220), trimLeft=c(17,21), maxN=0, maxEE=c(2,5),
truncQ=2,compress=TRUE, verbose=TRUE)
}
derepFs_HC <- derepFastq(filtFs_HC, verbose=TRUE)
derepRs_HC <- derepFastq(filtRs_HC, verbose=TRUE)
errF_HC <- learnErrors(filtFs_HC, multithread=TRUE)
errR_HC <- learnErrors(filtRs_HC, multithread=TRUE)
plotErrors(errF_HC)
plotErrors(errR_HC)
dadaFs_HC<-dada(derepFs_HC, err=errF_HC, pool=TRUE, multithread=TRUE)
dadaRs_HC<-dada(derepRs_HC, err=errR_HC, pool=TRUE, multithread=TRUE)
mergers_HC<-mergePairs(dadaFs_HC, derepFs_HC, dadaRs_HC, derepRs_HC, verbose=TRUE)
seqtab_HC<- makeSequenceTable(mergers_HC, orderBy="abundance")

# Processing performed on ABpos sequencing run
fns_ABpos <- sort(list.files(miseq_path, full.names = TRUE))
fnFs_ABpos <- fns_ABpos[grepl("R1", fns_ABpos)]
fnRs_ABpos <- fns_ABpos[grepl("R2", fns_ABpos)]
plotQualityProfile(fnFs_ABpos[1:3])
plotQualityProfile(fnRs_ABpos[1:3])
if(!file_test("-d", filt_path)) dir.create(filt_path)
filtFs_ABpos <- file.path(filt_path, basename(fnFs_ABpos))
filtRs_ABpos <- file.path(filt_path, basename(fnRs_ABpos))
for(i in seq_along(fnFs_ABpos)) {
  fastqPairedFilter(c(fnFs_ABpos[[i]], fnRs_ABpos[[i]]),
                   c(filtFs_ABpos[[i]], filtRs_ABpos[[i]]),
                   truncLen=c(290,220), trimLeft=c(17,21), maxN=0, maxEE=c(2,5),
truncQ=2,compress=TRUE, verbose=TRUE)
}
derepFs_ABpos <- derepFastq(filtFs_ABpos, verbose=TRUE)
derepRs_ABpos <- derepFastq(filtRs_ABpos, verbose=TRUE)
errF_ABpos <- learnErrors(filtFs_ABpos, multithread=TRUE)
errR_ABpos <- learnErrors(filtRs_ABpos, multithread=TRUE)
plotErrors(errF_ABpos)
plotErrors(errR_ABpos)
dadaFs_ABpos<-dada(derepFs_ABpos, err=errF_ABpos, pool=TRUE, multithread=TRUE)
dadaRs_ABpos<-dada(derepRs_ABpos, err=errR_ABpos, pool=TRUE, multithread=TRUE)
mergers_ABpos<-mergePairs(dadaFs_ABpos, derepFs_ABpos, dadaRs_ABpos, derepRs_ABpos,
verbose=TRUE)

```

```

seqtab_ABpos<- makeSequenceTable(mergers_ABpos, orderBy="abundance")

# Merging results
seqtab.all<- mergeSequenceTables(seqtab_HC, seqtab_ABpos)
seqtabNoC<- removeBimeraDenovo(seqtab.all, verbose=TRUE)
ref_fasta<-"/silva_nr_v132_train_set.fa.gz"
taxtab<- assignTaxonomy(seqtabNoC, refFasta = ref_fasta, multithread=TRUE, verbose=TRUE)
colnames(taxtab)<-c("Kingdom", "Phylum", "Class", "Order", "Family", "Genus")
write.table(taxtab, "seqtabNoC_w_taxonomy.txt", sep='\t', row.names=FALSE, quote=FALSE)
seqs <- getSequences(seqtabNoC)
names(seqs) <- seqs
alignment <- AlignSeqs(DNAStringSet(seqs), anchor=NA)
phang.align <- phyDat(as(alignment, "matrix"), type="DNA")
dm <- dist.ml(phang.align)
treeNJ <- NJ(dm) # Note, tip order != sequence order
fit = pml(treeNJ, data=phang.align)
fitGTR <- update(fit, k=4, inv=0.2)
fitGTR <- optim.pml(fitGTR, model="GTR", optInv=TRUE, optGamma=TRUE,
  rearrangement = "stochastic", control = pml.control(trace = 0))
samdf <- read.csv("metadata.csv", header=TRUE)
samdf <- samdf[!duplicated(samdf$SampleID),]
all(rownames(seqtabNoC) %in% samdf$SampleID)
rownames(samdf) <- samdf$SampleID
ps <- phyloseq(tax_table(taxtab), sample_data(samdf), otu_table(seqtabNoC, taxa_are_rows =
  FALSE), phy_tree(fitGTR$tree))

```

**Supplementary Methods 3. UPARSE and UNOISE command line.** The same version (11.0.667) and the same commands were used on Linux and Mac OS.

```

usearch -fastq_mergepairs *R1*.fastq -relabel @ -fastq_minmergelen 400 -fastq_maxmergelen 480 -
fastqout ../output/merged.fq -fastq_maxdiffs 10
usearch -fastx_truncate merged.fq -stripleft 17 -stripright 21 -fastqout stripped.fq
usearch -fastq_filter stripped.fq -fastq_maxee 1.0 -fastaout filtered.fa
usearch -fastx_uniques filtered.fa -fastaout uniques.fa -relabel Uniq -sizeout
#Clustering step using UPARSE
usearch -cluster_otus uniques.fa -minsize 2 -otus otu.fa -relabel Otu
usearch -usearch_global merged.fq -db otu.fa -strand plus -id 0.97 -otutabout otutable.txt
#Taxonomy assignation using mothur
classify.seqs(fasta=otu.fasta, count=otu.count_table, template= /silva.v34.fasta, taxonomy=/
silva.seed_v132.tax, cutoff=80)
remove.lineage(fasta=otu.fasta, count=otu.count_table, taxonomy=otu.seed_v132.wang.taxonomy,
taxon=unknown;-Archaea;-Eukaryota;)
summary.tax(taxonomy=otu.seed_v132.wang.pick.taxonomy, count=otu.pick.count_table)
phylotype(taxonomy=otu.seed_v132.wang.pick.taxonomy)
classify.otu(list=otu.seed_v132.wang.pick.tx.list, count=otu.pick.count_table,
taxonomy=otu.seed_v132.wang.pick.taxonomy, label=0.03, cutoff=80, probs=F)
#Clustering step using UNOISE
usearch -unoise3 uniques.fa -zotus otus100.fa -tabbedout unoise3.txt

```

```

usearch -cluster_smallmem otus100.fa -id 0.99 -centroids otus99.fa -sortedby other
#Taxonomy assignation using mothur
classify.seqs(fasta=otus99.fa, count=otus99.count_table, template= /silva.v34.fasta, taxonomy=/
silva.seed_v132.tax, cutoff=80)
remove.lineage(fasta=otus99.fa, count=otus99.count_table,
taxonomy=otus99.seed_v132.wang.taxonomy, taxon=unknown;-Archaea;-Eukaryota;)
summary.tax(taxonomy=otus99.seed_v132.wang.pick.taxonomy, count=otus99.pick.count_table)
phyloptype(taxonomy=otu.seed_v132.wang.pick.taxonomy)
classify.otu(list=otus99.seed_v132.wang.pick.tx.list, count=otus99.pick.count_table,
taxonomy=otus99.seed_v132.wang.pick.taxonomy, label=0.01, cutoff=80, probs=F)

```

**Supplementary Methods 4. Mothur command line.** The same version (1.43.0) and the same commands were used on Linux and Mac OS.

```

make.file(inputdir='/input/', type=fastq, prefix=stability)
make.contigs(file=stability.files)
summary.seqs(fasta=stability.trim.contigs.fasta)
trim.seqs(fasta=stability.trim.contigs.fasta, oligos=v34.oligos)
screen.seqs(fasta=stability.trim.contigs.trim.fasta, group=stability.contigs.groups, maxambig=0)
summary.seqs(fasta=stability.trim.contigs.trim.good.fasta)
unique.seqs(fasta=stability.trim.contigs.trim.good.fasta)
count.seqs(name=stability.trim.contigs.trim.good.names, group=stability.contigs.good.groups)
summary.seqs(count=stability.trim.contigs.trim.good.count_table)
align.seqs(fasta=stability.trim.contigs.trim.good.unique.fasta, reference=/silva.v34.fasta, flip=T)
summary.seqs(fasta=stability.trim.contigs.trim.good.unique.align,
count=stability.trim.contigs.trim.good.count_table)
screen.seqs(fasta=stability.trim.contigs.trim.good.unique.align,
count=stability.trim.contigs.trim.good.count_table,
summary=stability.trim.contigs.trim.good.unique.summary, start=40, end=17052, maxhomop=8)
filter.seqs(fasta=stability.trim.contigs.trim.good.unique.good.align, vertical=T, trump=.)
unique.seqs(fasta=stability.trim.contigs.trim.good.unique.good.filter.fasta,
count=stability.trim.contigs.trim.good.good.count_table)
pre.cluster(fasta=stability.trim.contigs.trim.good.unique.good.filter.unique.fasta,
count=stability.trim.contigs.trim.good.unique.good.filter.count_table, diffs=4)
chimera.vsearch(fasta=stability.trim.contigs.trim.good.unique.good.filter.unique.precluster.fasta,
count=stability.trim.contigs.trim.good.unique.good.filter.unique.precluster.count_table, dereplicate=t,
processors=8)
remove.seqs(fasta=stability.trim.contigs.trim.good.unique.good.filter.unique.precluster.fasta,
accnos=stability.trim.contigs.trim.good.unique.good.filter.unique.precluster.denovo.vsearch.accnos)
classify.seqs(fasta=stability.trim.contigs.trim.good.unique.good.filter.unique.precluster.pick.fasta,
count=stability.trim.contigs.trim.good.unique.good.filter.unique.precluster.denovo.vsearch.pick.coun
t_table, reference=silva.v34.fasta, taxonomy=silva.seed_v132.tax, cutoff=80)
remove.lineage(fasta=stability.trim.contigs.trim.good.unique.good.filter.unique.precluster.pick.fasta,
count=stability.trim.contigs.trim.good.unique.good.filter.unique.precluster.denovo.vsearch.pick.coun
t_table,
taxonomy=stability.trim.contigs.trim.good.unique.good.filter.unique.precluster.pick.seed_v132.wang
.taxonomy, taxon=taxon=unknown;-Archaea;-Eukaryota;)
summary.tax(taxonomy=current, count=current)
#Clustering step: 97% identity threshold

```

```

cluster.split(fasta=stability.trim.contigs.trim.good.unique.good.filter.unique.precluster.pick.pick.fasta
,
count=stability.trim.contigs.trim.good.unique.good.filter.unique.precluster.denovo.vsearch.pick.pick.
count_table,
taxonomy=stability.trim.contigs.trim.good.unique.good.filter.unique.precluster.pick.seed_v132.wang
.pick.taxonomy, splitmethod=classify, taxlevel=4, cutoff=0.03)
make.shared(list=stability.trim.contigs.trim.good.unique.good.filter.unique.precluster.pick.pick.opti_
mcc.list,
count=stability.trim.contigs.trim.good.unique.good.filter.unique.precluster.denovo.vsearch.pick.pick.
count_table, label=0.03)
classify.otu(list=stability.trim.contigs.trim.good.unique.good.filter.unique.precluster.pick.pick.opti_
mcc.list,
count=stability.trim.contigs.trim.good.unique.good.filter.unique.precluster.denovo.vsearch.pick.pick.
count_table,
taxonomy=stability.trim.contigs.trim.good.unique.good.filter.unique.precluster.pick.seed_v132.wang
.pick.taxonomy, label=0.03, cutoff=80, probs=F)
phylo.type(taxonomy=stability.trim.contigs.trim.good.unique.good.filter.unique.precluster.pick.seed_
v132.wang.pick.taxonomy)
#Clustering step: 99% identity threshold
cluster.split(fasta=stability.trim.contigs.trim.good.unique.good.filter.unique.precluster.pick.pick.fasta
,
count=stability.trim.contigs.trim.good.unique.good.filter.unique.precluster.denovo.vsearch.pick.pick.
count_table,
taxonomy=stability.trim.contigs.trim.good.unique.good.filter.unique.precluster.pick.seed_v132.wang
.pick.taxonomy, splitmethod=classify, taxlevel=4, cutoff=0.01)
make.shared(list=stability.trim.contigs.trim.good.unique.good.filter.unique.precluster.pick.pick.opti_
mcc.list,
count=stability.trim.contigs.trim.good.unique.good.filter.unique.precluster.denovo.vsearch.pick.pick.
count_table, label=0.01)
classify.otu(list=stability.trim.contigs.trim.good.unique.good.filter.unique.precluster.pick.pick.opti_
mcc.list,
count=stability.trim.contigs.trim.good.unique.good.filter.unique.precluster.denovo.vsearch.pick.pick.
count_table,
taxonomy=stability.trim.contigs.trim.good.unique.good.filter.unique.precluster.pick.seed_v132.wang
.pick.taxonomy, label=0.01, cutoff=80, probs=F)

```

**Supplementary Methods 5. Command line used to customize the SILVA (version 132) and RDP (version 16) reference databases in QIIME2 (<https://docs.qiime2.org/2018.8/tutorials/feature-classifier/>).** The same version (2018.8) and the same commands were used on Linux and Mac OS.

```

#SILVA
qiime feature-classifier extract-reads --i-sequences 99-otus.qza --p-f-primer
CCTACGGGNGGCWGCAG --p-r-primer GGATTAGATACCCVHGTAGTC --o-reads ref-
seqs.qza
qiime feature-classifier fit-classifier-naive-bayes --i-reference-reads ref-seqs.qza --i-reference-
taxonomy 7_level_taxonomy.qza --o-classifier silva-V3V4-classifier.qza
#RDP

```

```
#RDP database download and conversion for QIIME2 feature-classifier as in https://vdtreis.com/rdp-database/  
qiime feature-classifier extract-reads --i-sequences RDP.qza --p-f-primer  
CCTACGGGNGGCWGCAG --p-r-primer GGATTAGATACCCVHGTAGTC --o-reads ref-  
seqs.qza  
qiime feature-classifier fit-classifier-naive-bayes --i-reference-reads ref-seqs.qza --i-reference-  
taxonomy ref-RDP_tax_new.qza --o-classifier RDP16-V3V4-classifier.qza
```

**Supplementary Methods 6. Command line used to customize the SILVA (version 132) (<https://blog.mothur.org/2016/07/07/Customization-for-your-region/>) and RDP (version 16) reference databases ([https://mothur.org/blog/2017/RDP-v16-reference\\_files/](https://mothur.org/blog/2017/RDP-v16-reference_files/)) in mothur.** The same version (1.43.0) and the same commands were used on Linux and Mac OS.

```
#SILVA  
wget -N https://www.arb-  
silva.de/fileadmin/arb_web_db/release_132/ARB_files/SILVA_132_SSURef_NR99_13_12_17_opt.  
arb.gz  
align.seqs(fasta=ecoli_v3v4.fasta, reference=silva.seed_v132.align)  
summary.seqs(fasta=ecoli_v3v4.align)  
pcr.seqs(fasta= /silva.seed_v132.align, start=6388, end=25316, keepdots=FALSE)  
rename.file(input=silva.seed_v132.pcr.align, new=silva.v34.fasta)  
summary.seqs(fasta=silva.v34.fasta)
```

**Supplementary Figure 1. Comparison of the relative abundance of phyla obtained by using QIIME2, Bioconductor, UPARSE, or mothur after clustering OTUs at 99%.**

P values were calculated using Friedman test followed by Dunn's multiple comparisons test. Wilcoxon signed rank test was applied when only 2 pipelines were compared.

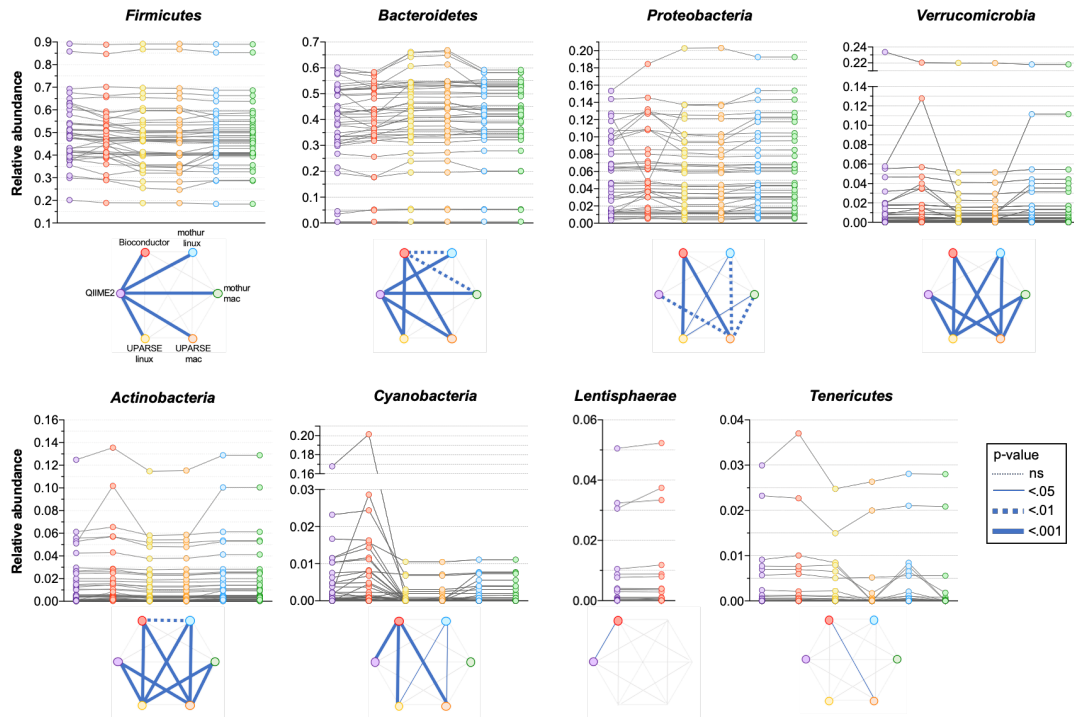



**Supplementary Figure 2. Comparison of the relative abundance of genera obtained by using QIIME2, Bioconductor, UPARSE, or mothur after clustering OTUs at 99%.**

P values were calculated using Friedman test followed by Dunn's multiple comparisons test. Wilcoxon signed rank test was applied when only 2 pipelines were compared.

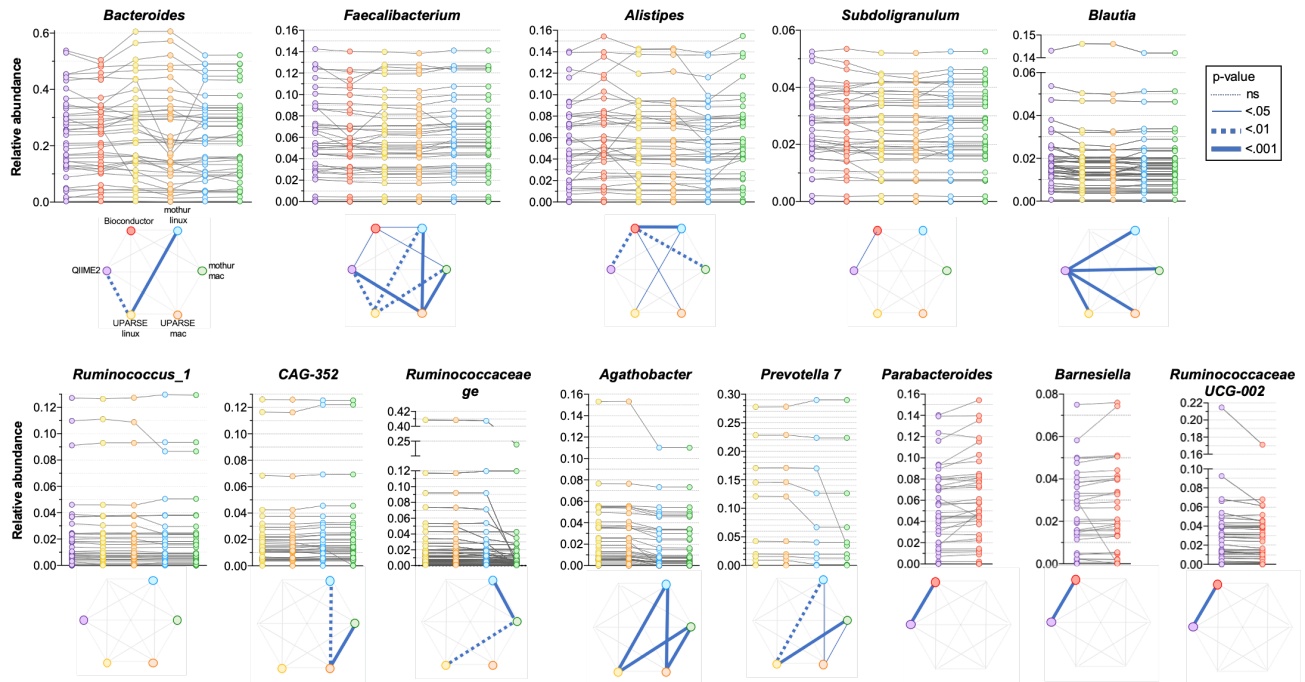

**Supplementary Figure 3. Comparison of the relative abundance of genera obtained by using QIIME2, Bioconductor, UPARSE, or mothur after clustering OTUs at 97% and by applying the RDP database (version 16).**

P values were calculated using Friedman test followed by Dunn's multiple comparisons test. Wilcoxon signed rank test was applied when only 2 pipelines were compared.

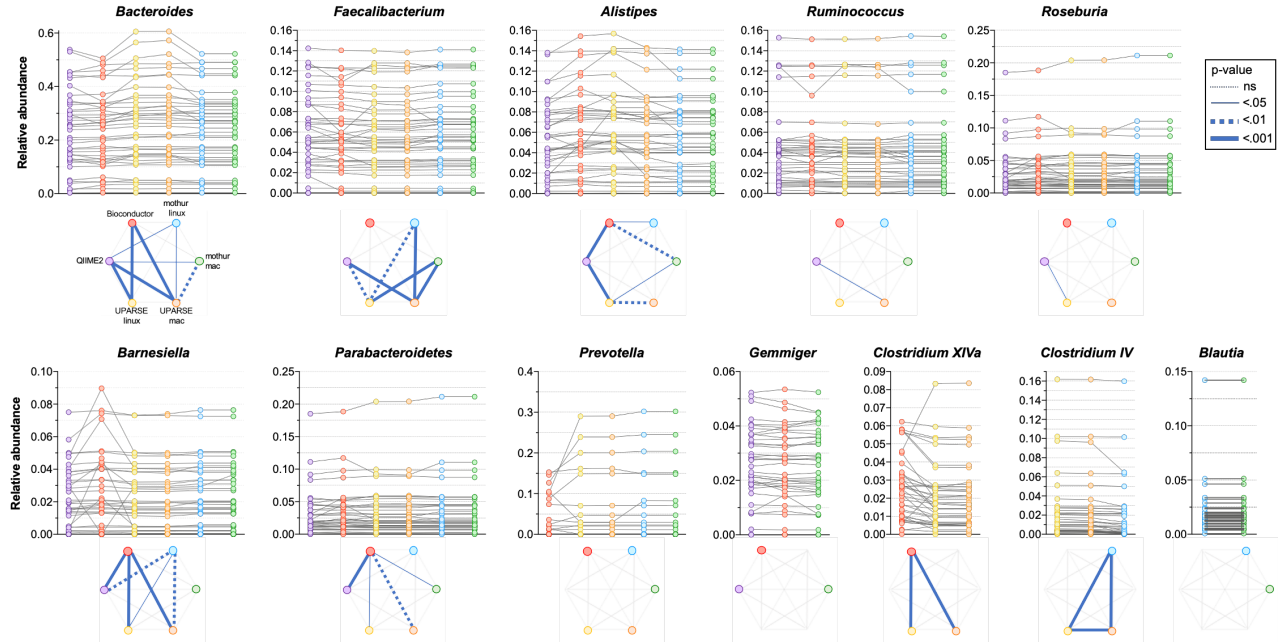

**Supplementary Figure 4. Alpha (A) and beta diversity (B-C) measures in QIIME2, Bioconductor, UPARSE or mothur.** Beta diversity metrics were computed using normalized data except for UPARSE, where they have not been calculated as the free 32-bit version of USEARCH did not allocate enough memory for the analysis. Only one mothur workflow is shown for beta diversity.

P values for Shannon index analysis were calculated using Friedman test followed by Dunn's multiple comparisons test.

**A** Alpha diversity: Shannon index

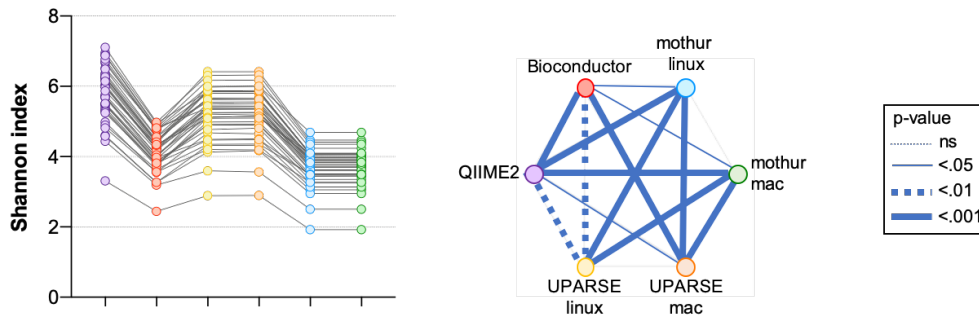

**B** Beta diversity: Principal coordinate analysis (PCoA) plots on the unweighted Unifrac

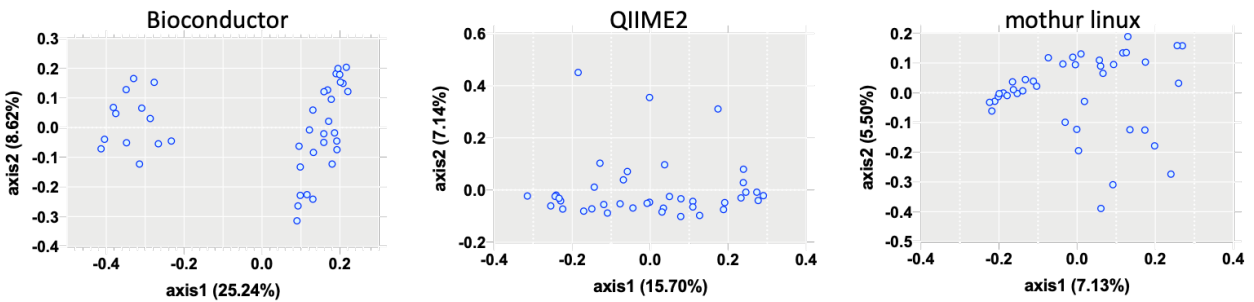

**C** Beta diversity: PCoA plots on the weighted Unifrac

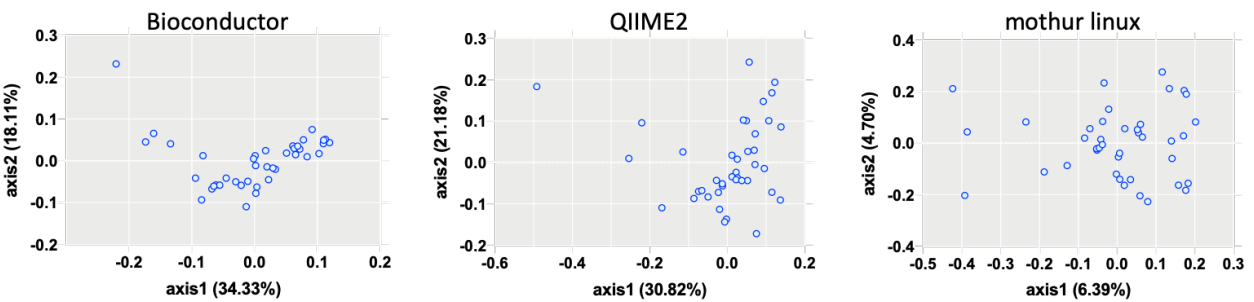

Supplement: Data_Sheet_1.pdf [file Data_Sheet_1.pdf]
