# Supplementary material for: Comparison of Bioinformatics Pipelines and Operating Systems for the Analyses of 16S rRNA Gene Amplicon Sequences in Human Fecal Samples
Source: Front Microbiol. 2020 Jun 17;11:1262. doi: 10.3389/fmicb.2020.01262 (PMC7318847; doi:10.3389/fmicb.2020.01262)
Supplement: Supplementary file 2 [file Table_1.xlsx]

## Sheet: ASVs-QIIME2
index	total	A003	A014	A018	A036	A042	A056	A063	A070	A080	A081	A093	A131	A139	A140	A147	A157	A160	A167	A169	A174	A181	A190	A215	A224	A235	A239	A243	A244	A258	A260	A262	C023	C035	C059	C072	C089	C114	C145	C146	C209
Root	2943852	124142	106262	124761	152392	46653	75608	86730	119999	22025	88126	97100	56583	34922	47813	69971	27464	46650	83104	87738	122452	99411	90362	103778	96517	25587	115829	113683	66235	77321	34257	136656	145098	18719	29874	43311	20641	24556	21737	25657	34128
D_0__Archaea;D_1__Euryarchaeota;D_2__Methanobacteria;D_3__Methanobacteriales;D_4__Methanobacteriaceae;D_5__Methanobacterium	13	0	4	0	0	0	0	0	0	0	0	0	0	0	0	0	0	0	0	0	0	0	0	0	0	0	0	9	0	0	0	0	0	0	0	0	0	0	0	0	0
D_0__Archaea;D_1__Euryarchaeota;D_2__Thermoplasmata;D_3__SG8-5;D_4__uncultured archaeon;D_5__uncultured archaeon	25	0	0	0	0	0	0	0	0	0	0	0	0	0	0	0	0	0	0	0	0	0	0	25	0	0	0	0	0	0	0	0	0	0	0	0	0	0	0	0	0
D_0__Archaea;D_1__Euryarchaeota;D_2__Thermoplasmata;__;__;__	24	0	0	0	0	0	0	0	0	0	0	0	0	0	0	8	0	0	0	0	0	0	0	2	0	0	0	0	0	0	0	0	14	0	0	0	0	0	0	0	0
D_0__Archaea;D_1__Euryarchaeota;__;__;__;__	2018	11	9	110	0	23	1774	20	6	0	0	0	0	0	0	0	0	0	0	0	22	0	0	0	17	0	0	3	4	0	0	0	0	0	19	0	0	0	0	0	0
D_0__Bacteria;D_1__Bacteroidetes;D_2__Bacteroidia;D_3__Bacteroidales;D_4__Bacteroidaceae;D_5__Bacteroides	659584	4821	5336	26061	41608	13722	1018	1544	30900	5257	39948	15176	14436	106	6843	11699	7752	15491	12183	32254	15581	33824	27674	9157	11344	4297	23355	28527	20597	35149	11922	59044	27402	882	3754	5666	11106	9911	11525	7587	15125
D_0__Bacteria;D_1__Bacteroidetes;D_2__Bacteroidia;D_3__Bacteroidales;D_4__Rikenellaceae;D_5__Alistipes	165098	11108	755	17468	17687	6487	0	186	9612	977	4	7099	5298	17	1345	2691	2227	588	905	3783	10018	6908	6430	7527	4654	1463	10770	6430	2689	0	1900	2342	4914	2313	1852	1948	415	348	440	796	2704
D_0__Bacteria;D_1__Firmicutes;D_2__Clostridia;D_3__Clostridiales;D_4__Ruminococcaceae;D_5__Faecalibacterium	160782	6671	2962	2842	4653	3395	0	412	5350	2745	13	2727	3938	1547	4145	3831	744	4046	5588	2898	6158	10011	10454	7392	4299	3166	213	10452	3457	11011	2281	14616	7057	388	1061	5557	1025	0	1393	2284	0
D_0__Bacteria;D_1__Firmicutes;D_2__Clostridia;D_3__Clostridiales;D_4__Ruminococcaceae;D_5__[Eubacterium] coprostanoligenes group	91949	1377	2290	2635	1313	920	0	34237	1135	662	1357	8490	897	1449	247	489	170	170	9512	1156	6817	1251	1012	651	6702	427	1187	600	173	126	240	529	253	594	1367	323	119	371	25	642	34
D_0__Bacteria;D_1__Firmicutes;D_2__Clostridia;D_3__Clostridiales;D_4__Ruminococcaceae;D_5__Ruminococcaceae UCG-002	75470	3919	1180	3611	1616	1310	0	1353	5855	0	0	4005	1410	0	1826	2301	174	76	1071	711	6188	3887	173	4122	6383	1108	3583	1560	2632	22	2340	871	2121	4018	2760	2337	30	509	68	340	0
D_0__Bacteria;D_1__Firmicutes;D_2__Clostridia;D_3__Clostridiales;D_4__Ruminococcaceae;D_5__Subdoligranulum	71953	2121	825	5311	0	1323	0	3393	2307	45	0	3941	861	1038	1023	2365	1016	993	2400	691	4528	2748	3155	1554	3206	1344	3794	2863	1452	3114	376	2639	5381	0	1521	997	377	455	597	520	1679
D_0__Bacteria;D_1__Bacteroidetes;D_2__Bacteroidia;D_3__Bacteroidales;D_4__Tannerellaceae;D_5__Parabacteroides	68087	1358	3512	4129	8589	1031	1257	137	3051	540	0	1396	1741	30	440	1136	962	987	626	1192	2478	1562	5775	2021	499	335	4866	1374	1575	2527	988	3381	4825	223	344	283	0	1034	166	882	835
D_0__Bacteria;D_1__Bacteroidetes;D_2__Bacteroidia;D_3__Bacteroidales;D_4__Barnesiellaceae;D_5__Barnesiella	63811	3630	72	5066	7635	647	171	177	2298	730	0	4171	1117	0	6	1834	2060	0	373	0	1931	4935	3467	3991	224	127	1813	3620	867	1622	0	3874	2306	556	1738	0	303	1168	784	108	390
D_0__Bacteria;D_1__Firmicutes;D_2__Clostridia;D_3__Clostridiales;D_4__Ruminococcaceae;D_5__Ruminococcus 1	56934	222	1850	11363	2119	833	0	34	435	0	3436	904	428	0	399	2576	3493	1012	3076	1602	2998	880	505	469	2328	123	704	2698	483	0	244	0	6692	198	945	460	3	484	13	2816	109
D_0__Bacteria;D_1__Firmicutes;D_2__Clostridia;D_3__Clostridiales;D_4__Lachnospiraceae;D_5__Blautia	55409	2081	492	2616	2839	207	48	4097	512	357	1197	1484	697	4997	648	419	696	867	1481	480	2411	2055	1802	1378	1352	276	3726	1211	955	4154	554	3400	1050	215	737	727	538	931	360	215	1147
D_0__Bacteria;D_1__Proteobacteria;D_2__Alphaproteobacteria;D_3__Rhodospirillales;D_4__uncultured;D_5__uncultured bacterium	53085	6163	180	323	0	0	0	5	3820	1826	0	305	790	14	918	4130	0	0	4	2246	0	0	176	8508	110	11	193	3785	2070	0	1472	0	13304	25	0	21	0	128	0	0	2558
D_0__Bacteria;D_1__Firmicutes;D_2__Clostridia;D_3__Clostridiales;D_4__Lachnospiraceae;D_5__Lachnospiraceae NK4A136 group	52199	1515	1415	1059	0	448	0	173	3133	710	462	841	1264	12	1878	1909	0	41	1531	7514	697	598	3109	2109	1021	737	262	6257	3955	0	507	1512	2803	480	1035	407	1287	140	669	100	609
D_0__Bacteria;D_1__Firmicutes;D_2__Clostridia;D_3__Clostridiales;D_4__Christensenellaceae;D_5__Christensenellaceae R-7 group	51128	1668	531	5069	331	1937	31	128	2124	50	0	910	2662	0	1019	2632	57	29	4178	848	3381	1652	3	1050	7934	654	327	5099	481	0	22	87	4751	933	432	66	0	0	10	3	39
D_0__Bacteria;D_1__Bacteroidetes;D_2__Bacteroidia;D_3__Bacteroidales;D_4__Prevotellaceae;D_5__Prevotella 9	48779	15872	20570	0	0	0	0	109	0	0	0	0	0	0	0	0	0	0	0	0	6448	0	0	0	1493	129	0	0	0	0	0	0	0	0	0	4158	0	0	0	0	0
D_0__Bacteria;D_1__Firmicutes;D_2__Clostridia;D_3__Clostridiales;D_4__Lachnospiraceae;D_5__[Eubacterium] eligens group	48703	854	1605	550	211	1305	0	52	2218	1303	5659	2567	1647	0	1854	1551	0	1169	0	6110	908	150	1135	1833	2189	56	0	707	0	0	0	4650	2269	0	617	1047	1579	0	510	744	1654
D_0__Bacteria;D_1__Verrucomicrobia;D_2__Verrucomicrobiae;D_3__Verrucomicrobiales;D_4__Akkermansiaceae;D_5__Akkermansia	47521	771	18	124	7089	9	17244	0	2200	0	0	832	267	149	38	646	0	197	2647	200	648	0	2	32	1676	71	6414	7	944	48	42	0	2927	0	579	0	0	1417	0	0	283
D_0__Bacteria;D_1__Firmicutes;D_2__Clostridia;D_3__Clostridiales;D_4__Lachnospiraceae;D_5__Agathobacter	45726	2967	718	0	140	1632	0	408	505	350	0	1051	2745	2199	248	879	0	4637	6033	131	1028	4954	454	357	345	94	3871	1004	3036	0	112	0	921	219	546	1342	0	867	1062	871	0
D_0__Bacteria;D_1__Firmicutes;D_2__Clostridia;D_3__Clostridiales;D_4__Ruminococcaceae;__	40833	434	1160	478	6022	171	5	10884	229	368	49	268	97	431	80	1297	115	189	96	543	514	242	135	4320	258	414	2221	355	126	5483	1562	444	857	582	186	41	20	60	38	14	45
D_0__Bacteria;D_1__Firmicutes;D_2__Clostridia;D_3__Clostridiales;D_4__Lachnospiraceae;D_5__Roseburia	39233	840	738	416	406	181	0	290	1116	64	4917	1336	391	75	369	673	237	4010	1118	2126	415	1026	712	551	679	316	1259	2459	3150	0	1435	2504	1512	131	198	989	584	319	1397	221	73
D_0__Bacteria;D_1__Firmicutes;D_2__Clostridia;D_3__Clostridiales;D_4__Lachnospiraceae;__	38466	664	1870	567	726	581	5	365	447	470	1060	600	263	771	2206	803	95	524	951	2890	417	244	1327	4719	618	112	2038	669	918	166	727	7478	1009	49	174	1010	158	278	113	153	231
D_0__Bacteria;D_1__Firmicutes;D_2__Clostridia;D_3__Clostridiales;D_4__Ruminococcaceae;D_5__Ruminococcus 2	37748	542	62	2882	0	589	0	33	594	0	1015	2796	289	0	0	0	702	739	556	2040	2217	1311	448	0	1952	150	13748	502	1966	0	0	0	894	211	337	226	0	411	147	389	0
D_0__Bacteria;D_1__Bacteroidetes;D_2__Bacteroidia;D_3__Bacteroidales;D_4__Prevotellaceae;__	37557	11081	6072	0	0	0	13	1148	0	0	33	0	0	0	5262	0	0	0	0	0	6483	0	0	3326	2243	217	2	1500	0	0	0	0	0	0	177	0	0	0	0	0	0
D_0__Bacteria;D_1__Firmicutes;D_2__Clostridia;D_3__Clostridiales;D_4__Ruminococcaceae;D_5__Ruminococcaceae UCG-014	36814	2884	2218	4328	74	17	0	1070	2710	78	0	3596	379	0	512	1878	0	29	169	0	2491	47	1606	2598	4417	1039	1907	1130	773	6	207	0	0	33	607	0	0	11	0	0	0
D_0__Bacteria;D_1__Firmicutes;D_2__Negativicutes;D_3__Selenomonadales;D_4__Veillonellaceae;D_5__Anaerospora	33292	879	298	2291	0	0	3230	0	0	126	13	9447	2460	0	0	87	10	0	2334	6000	394	30	0	302	1276	0	0	0	0	0	309	0	2157	182	117	0	0	0	470	0	880
D_0__Bacteria;D_1__Cyanobacteria;D_2__Melainabacteria;D_3__Gastranaerophilales;D_4__Candidatus Melainabacteria bacterium RIFOXYA2_FULL_32_9;D_5__Candidatus Melainabacteria bacterium RIFOXYA2_FULL_32_9	31097	1282	883	94	0	0	0	0	0	361	0	368	0	0	77	210	9	0	20	2	0	0	111	664	0	12	731	1821	0	0	0	0	24353	0	0	0	99	0	0	0	0
D_0__Bacteria;D_1__Proteobacteria;D_2__Gammaproteobacteria;D_3__Betaproteobacteriales;D_4__Burkholderiaceae;D_5__Sutterella	30256	4982	1864	64	0	0	0	96	2631	530	0	0	1346	200	1195	13	0	0	176	80	917	2908	4421	3178	118	138	811	0	0	0	647	0	3793	47	71	0	0	0	0	30	0
D_0__Bacteria;D_1__Proteobacteria;D_2__Gammaproteobacteria;D_3__Betaproteobacteriales;D_4__Burkholderiaceae;D_5__Parasutterella	29138	0	0	28	11856	462	3	0	0	0	0	2243	31	0	0	743	691	1958	554	0	89	0	692	7	0	0	0	724	701	967	0	5333	0	23	126	722	271	0	0	86	828
D_0__Bacteria;D_1__Synergistetes;D_2__Synergistia;D_3__Synergistales;D_4__Synergistaceae;D_5__Pyramidobacter	28492	2	0	0	0	12	27800	0	0	0	177	0	0	0	0	2	0	0	0	0	18	379	0	0	0	0	0	0	69	0	0	0	0	0	0	0	0	0	0	0	33
D_0__Bacteria;D_1__Bacteroidetes;D_2__Bacteroidia;D_3__Bacteroidales;__;__	26759	946	197	2240	2805	368	0	15	328	168	0	1593	369	0	346	687	157	0	35	0	573	2710	645	797	267	212	2835	966	1054	573	362	4301	134	13	26	52	0	152	166	494	173
D_0__Bacteria;D_1__Firmicutes;D_2__Clostridia;D_3__Clostridiales;D_4__Ruminococcaceae;D_5__Ruminiclostridium 6	25915	5656	809	123	1146	280	11	10	2628	0	235	836	887	0	297	0	0	555	67	0	189	0	0	6348	126	270	0	0	293	0	774	17	3052	527	50	19	0	0	0	0	710
D_0__Bacteria;D_1__Firmicutes;D_2__Erysipelotrichia;D_3__Erysipelotrichales;D_4__Erysipelotrichaceae;D_5__Erysipelotrichaceae UCG-003	23004	145	14	835	151	23	0	7374	38	0	0	1472	507	3856	521	0	0	123	1566	1023	10	65	509	204	384	64	1295	186	92	354	48	1429	277	26	47	104	243	0	0	19	0
D_0__Bacteria;D_1__Firmicutes;D_2__Clostridia;D_3__Clostridiales;D_4__Lachnospiraceae;D_5__Lachnospira	22585	905	247	105	1772	350	0	56	353	235	387	964	645	80	250	556	318	570	1925	627	1302	129	64	7	668	42	274	256	814	2529	0	2145	2322	0	238	615	17	551	0	267	0
D_0__Bacteria;D_1__Actinobacteria;D_2__Actinobacteria;D_3__Bifidobacteriales;D_4__Bifidobacteriaceae;D_5__Bifidobacterium	22549	74	125	1188	481	615	9	2042	41	0	2539	1593	8	1064	19	421	858	154	4078	0	1322	1934	126	9	949	0	1504	118	87	0	4	324	15	800	10	0	0	0	0	20	18
D_0__Bacteria;D_1__Proteobacteria;D_2__Gammaproteobacteria;D_3__Enterobacteriales;D_4__Enterobacteriaceae;D_5__Escherichia-Shigella	21761	0	0	162	128	16	1702	92	25	750	334	1475	1225	29	8	21	0	11	19	0	6723	251	0	30	531	41	17	220	1669	3994	1123	0	0	0	0	0	0	0	0	1165	0
D_0__Bacteria;D_1__Firmicutes;D_2__Negativicutes;D_3__Selenomonadales;D_4__Veillonellaceae;D_5__Dialister	20231	1283	15	0	5382	127	533	23	292	0	212	0	0	0	492	0	4	0	0	0	2318	607	135	324	0	830	5764	158	302	63	0	1268	0	0	0	0	0	99	0	0	0
D_0__Bacteria;D_1__Firmicutes;D_2__Clostridia;D_3__Clostridiales;D_4__Lachnospiraceae;D_5__Fusicatenibacter	19880	403	115	368	2386	178	0	178	264	99	1182	416	347	686	95	643	0	629	1924	301	521	1486	1854	333	373	253	260	72	235	0	208	1115	696	0	169	671	412	0	95	154	759
D_0__Bacteria;D_1__Firmicutes;D_2__Clostridia;D_3__Clostridiales;D_4__Lachnospiraceae;D_5__Anaerostipes	18674	155	40	1234	846	34	0	1601	0	20	1085	1330	35	1003	66	267	492	596	1282	642	123	151	447	49	147	109	266	4454	58	223	73	615	297	42	0	423	0	299	104	0	66
D_0__Bacteria;D_1__Firmicutes;D_2__Clostridia;D_3__Clostridiales;D_4__Lachnospiraceae;D_5__[Ruminococcus] torques group	16699	1051	198	1344	983	101	0	1461	829	91	402	186	88	1298	189	893	82	394	379	53	226	124	22	264	1379	142	2071	148	365	689	145	24	503	0	135	105	94	88	90	63	0
D_0__Bacteria;D_1__Firmicutes;D_2__Bacilli;D_3__Lactobacillales;D_4__Streptococcaceae;D_5__Streptococcus	16684	87	110	80	34	30	9674	146	78	20	629	17	42	48	2194	700	16	390	552	95	22	231	38	0	80	9	46	663	0	33	44	36	27	165	0	0	0	26	0	300	22
D_0__Bacteria;D_1__Firmicutes;D_2__Negativicutes;D_3__Selenomonadales;D_4__Veillonellaceae;D_5__Veillonella	16594	0	0	11	10	365	34	110	36	19	13836	17	12	31	379	31	0	298	16	36	0	22	45	21	39	0	0	82	8	54	0	596	28	163	0	0	0	0	0	273	22
D_0__Bacteria;D_1__Firmicutes;D_2__Clostridia;D_3__Clostridiales;D_4__Ruminococcaceae;D_5__Ruminococcaceae UCG-005	16498	1320	869	319	192	815	13	95	1327	0	0	406	426	12	330	828	7	15	54	297	1574	151	27	1997	1671	339	18	572	265	35	557	171	513	141	728	302	0	0	8	67	37
D_0__Bacteria;D_1__Proteobacteria;D_2__Deltaproteobacteria;D_3__Desulfovibrionales;D_4__Desulfovibrionaceae;D_5__Desulfovibrio	16493	494	382	705	3719	204	188	267	469	51	0	163	168	9	316	780	130	133	232	360	728	181	549	859	184	0	574	319	870	247	253	0	196	1794	171	390	80	89	79	107	53
D_0__Bacteria;D_1__Firmicutes;D_2__Clostridia;D_3__Clostridiales;D_4__Lachnospiraceae;D_5__Dorea	16377	838	224	282	64	250	0	2359	312	170	739	125	127	2172	592	201	0	0	497	286	1591	858	122	131	571	100	335	134	259	810	169	631	375	275	195	198	73	55	11	115	131
D_0__Bacteria;D_1__Bacteroidetes;D_2__Bacteroidia;D_3__Bacteroidales;D_4__Marinifilaceae;D_5__Odoribacter	15066	812	181	1383	710	197	0	66	1083	0	0	1437	735	0	213	306	170	0	104	428	1288	864	731	316	365	180	246	1286	545	0	144	0	299	9	28	162	216	241	0	196	125
D_0__Bacteria;D_1__Bacteroidetes;D_2__Bacteroidia;D_3__Bacteroidales;D_4__Prevotellaceae;D_5__Prevotellaceae UCG-003	14415	1038	336	0	0	212	0	40	3667	0	0	0	0	0	655	1243	369	0	1803	0	729	0	2438	1211	330	344	0	0	0	0	0	0	0	0	0	0	0	0	0	0	0
D_0__Bacteria;D_1__Firmicutes;D_2__Clostridia;D_3__Clostridiales;D_4__Ruminococcaceae;D_5__uncultured	14124	835	694	461	707	492	47	100	773	50	14	501	240	38	330	597	152	83	45	211	1735	690	185	883	1166	138	683	405	214	33	64	275	235	187	575	37	18	46	77	98	10
D_0__Bacteria;D_1__Actinobacteria;D_2__Coriobacteriia;D_3__Coriobacteriales;D_4__Coriobacteriaceae;D_5__Collinsella	13772	1022	203	132	35	136	0	1609	88	0	0	103	0	1562	253	92	115	491	624	0	1517	606	264	103	3035	55	1208	145	148	0	12	59	87	42	17	0	0	0	9	0	0
D_0__Bacteria;D_1__Bacteroidetes;D_2__Bacteroidia;D_3__Bacteroidales;D_4__Muribaculaceae;D_5__uncultured bacterium	13597	981	319	3878	0	0	0	0	0	0	3	0	0	13	0	2767	0	0	0	0	0	0	0	64	4321	394	0	0	0	0	0	7	0	0	0	0	0	850	0	0	0
D_0__Bacteria;D_1__Proteobacteria;D_2__Gammaproteobacteria;D_3__Enterobacteriales;D_4__Enterobacteriaceae;D_5__Serratia	12766	150	8	0	68	0	9381	0	22	0	187	0	0	0	595	0	0	17	0	0	0	0	0	433	55	0	11	107	0	0	561	0	165	0	0	0	0	0	0	1006	0
D_0__Bacteria;D_1__Firmicutes;D_2__Clostridia;D_3__Clostridiales;D_4__Ruminococcaceae;D_5__Ruminococcaceae UCG-010	12410	622	1857	966	0	24	0	6	1976	0	0	213	224	0	154	88	0	36	0	70	1373	0	0	887	391	93	0	2970	0	0	21	0	389	44	6	0	0	0	0	0	0
D_0__Bacteria;D_1__Firmicutes;D_2__Clostridia;D_3__Clostridiales;D_4__Lachnospiraceae;D_5__Lachnospiraceae ND3007 group	12279	156	217	124	1795	143	0	18	168	230	0	615	170	493	175	1094	0	0	1254	541	219	125	217	304	487	148	318	257	223	0	83	702	459	27	549	366	172	159	87	43	141
D_0__Bacteria;D_1__Firmicutes;D_2__Clostridia;D_3__Clostridiales;D_4__Lachnospiraceae;D_5__Butyrivibrio	11180	0	5911	0	0	184	0	0	1590	0	0	0	0	0	0	0	0	0	0	0	0	0	0	0	283	3212	0	0	0	0	0	0	0	0	0	0	0	0	0	0	0
D_0__Bacteria;D_1__Firmicutes;D_2__Clostridia;D_3__Clostridiales;D_4__Ruminococcaceae;D_5__Oscillibacter	10924	299	116	153	1226	201	0	135	455	110	17	199	106	15	43	49	133	95	147	147	331	389	1453	111	41	70	462	232	131	463	319	376	172	457	293	332	61	1134	334	82	35
D_0__Bacteria;D_1__Firmicutes;D_2__Clostridia;D_3__Clostridiales;D_4__Lachnospiraceae;D_5__Lachnoclostridium	10888	57	58	10	1474	108	0	41	59	52	950	394	97	932	261	408	49	228	297	977	80	134	65	131	69	12	1190	36	254	342	314	288	150	0	79	584	145	199	0	0	364
D_0__Bacteria;D_1__Lentisphaerae;D_2__Lentisphaeria;D_3__Victivallales;D_4__Victivallaceae;D_5__Victivallis	10851	1141	2158	0	0	53	0	0	59	0	0	0	142	0	37	15	0	0	0	0	3966	0	0	127	28	0	48	465	14	0	0	0	547	0	0	2051	0	0	0	0	0
D_0__Bacteria;D_1__Bacteroidetes;D_2__Bacteroidia;D_3__Bacteroidales;D_4__Rikenellaceae;D_5__Rikenellaceae RC9 gut group	10846	0	7817	0	0	0	0	126	2707	0	0	0	0	0	62	0	0	0	0	0	0	0	0	5	9	120	0	0	0	0	0	0	0	0	0	0	0	0	0	0	0
D_0__Bacteria;D_1__Firmicutes;D_2__Clostridia;D_3__Clostridiales;D_4__Lachnospiraceae;D_5__Lachnospiraceae UCG-001	10804	0	97	20	0	0	0	0	78	0	894	443	205	0	85	25	0	0	456	1427	292	46	587	27	125	38	0	1247	566	0	51	1935	750	0	318	861	52	0	0	0	179
D_0__Bacteria;D_1__Firmicutes;D_2__Clostridia;D_3__Clostridiales;D_4__Clostridiales vadinBB60 group;D_5__uncultured bacterium	9837	1926	572	889	288	556	28	0	929	7	0	48	16	3	737	136	11	23	0	0	613	0	44	2169	0	9	0	613	7	8	0	0	55	34	10	45	0	0	11	0	50
D_0__Bacteria;D_1__Firmicutes;D_2__Clostridia;D_3__Clostridiales;D_4__Lachnospiraceae;D_5__Coprococcus 2	9753	1234	641	1740	363	0	0	0	356	0	0	680	610	0	122	194	0	252	0	0	347	0	0	255	670	32	778	0	0	0	0	0	969	0	412	0	0	0	98	0	0
D_0__Bacteria;D_1__Bacteroidetes;D_2__Bacteroidia;D_3__Bacteroidales;D_4__Prevotellaceae;D_5__Prevotellaceae NK3B31 group	9721	960	0	0	0	0	0	94	7145	2	0	0	0	0	0	0	0	0	0	0	566	0	0	954	0	0	0	0	0	0	0	0	0	0	0	0	0	0	0	0	0
D_0__Bacteria;D_1__Firmicutes;D_2__Clostridia;D_3__Clostridiales;D_4__Lachnospiraceae;D_5__[Eubacterium] hallii group	9022	226	39	532	812	57	0	1064	49	35	84	361	29	846	135	168	401	0	676	0	407	192	570	118	328	36	386	173	106	0	46	133	197	81	167	246	0	84	42	21	175
D_0__Bacteria;D_1__Bacteroidetes;D_2__Bacteroidia;D_3__Bacteroidales;D_4__Barnesiellaceae;D_5__uncultured	8941	228	0	516	0	95	0	0	150	0	0	67	77	0	0	0	373	0	26	0	0	123	446	619	23	0	139	2536	226	0	0	0	3091	0	0	57	0	149	0	0	0
D_0__Bacteria;D_1__Firmicutes;D_2__Negativicutes;D_3__Selenomonadales;D_4__Veillonellaceae;__	8337	0	721	0	0	0	0	113	0	0	0	0	0	0	0	3086	250	0	0	0	0	0	2157	0	0	0	0	0	156	0	0	0	0	199	270	922	0	0	0	463	0
D_0__Bacteria;D_1__Bacteroidetes;D_2__Bacteroidia;D_3__Bacteroidales;D_4__Prevotellaceae;D_5__Alloprevotella	8110	0	5948	0	0	0	0	0	0	0	0	0	0	0	0	0	0	0	0	0	0	0	0	2162	0	0	0	0	0	0	0	0	0	0	0	0	0	0	0	0	0
D_0__Bacteria;D_1__Firmicutes;D_2__Clostridia;D_3__Clostridiales;D_4__Lachnospiraceae;D_5__[Eubacterium] xylanophilum group	7955	92	275	322	357	444	0	53	136	25	577	191	462	0	258	135	223	0	669	320	136	31	0	720	321	99	0	346	469	0	89	315	260	114	92	63	0	0	111	127	123
D_0__Bacteria;D_1__Firmicutes;D_2__Clostridia;D_3__Clostridiales;D_4__Ruminococcaceae;D_5__Ruminococcaceae UCG-004	7607	221	17	155	734	38	0	114	67	55	1599	75	77	102	128	167	28	231	150	100	135	464	137	54	153	97	796	83	107	116	12	701	73	189	150	55	19	80	116	0	12
D_0__Bacteria;D_1__Firmicutes;D_2__Clostridia;D_3__Clostridiales;D_4__Lachnospiraceae;D_5__[Eubacterium] ventriosum group	7447	132	103	190	139	65	0	348	99	36	1091	355	220	403	11	101	0	45	739	189	369	142	23	67	230	8	1124	214	223	108	20	104	203	0	44	87	149	32	15	0	19
D_0__Bacteria;D_1__Firmicutes;D_2__Clostridia;D_3__Clostridiales;D_4__Ruminococcaceae;D_5__Ruminococcaceae NK4A214 group	6486	198	258	327	1120	121	0	135	172	6	0	245	16	0	137	165	3	0	19	6	157	103	0	383	448	32	725	248	111	0	27	0	153	0	254	883	0	0	0	0	34
D_0__Bacteria;D_1__Tenericutes;D_2__Mollicutes;D_3__Anaeroplasmatales;D_4__Anaeroplasmataceae;D_5__Anaeroplasma	5968	0	2984	0	307	0	0	0	2115	0	0	0	0	0	0	0	0	0	0	0	0	0	0	562	0	0	0	0	0	0	0	0	0	0	0	0	0	0	0	0	0
D_0__Bacteria;D_1__Firmicutes;D_2__Clostridia;D_3__Clostridiales;D_4__Ruminococcaceae;D_5__Ruminococcaceae UCG-003	5773	92	223	22	0	0	0	0	369	0	0	509	203	10	721	85	0	390	62	0	64	286	0	870	45	50	0	397	391	0	48	0	284	212	358	0	36	0	0	0	46
D_0__Bacteria;D_1__Firmicutes;D_2__Clostridia;D_3__Clostridiales;D_4__Lachnospiraceae;D_5__[Eubacterium] ruminantium group	5611	0	274	0	0	0	0	75	0	0	5	0	157	0	463	0	0	0	427	0	67	0	0	0	30	489	0	0	379	0	0	0	0	0	389	2856	0	0	0	0	0
D_0__Bacteria;D_1__Firmicutes;D_2__Clostridia;D_3__Clostridiales;D_4__Ruminococcaceae;D_5__Ruminococcaceae UCG-013	5496	29	42	176	285	31	0	30	20	331	155	87	51	40	216	60	225	249	441	497	250	76	116	13	152	8	81	338	80	184	45	496	336	13	30	72	54	32	49	74	32
D_0__Bacteria;D_1__Firmicutes;D_2__Clostridia;D_3__Clostridiales;D_4__Lachnospiraceae;D_5__Coprococcus 3	5260	545	124	20	0	155	0	702	209	57	0	193	102	94	61	89	0	0	369	0	173	518	86	146	231	48	289	74	66	0	103	174	120	20	103	135	0	159	0	95	0
D_0__Bacteria;D_1__Firmicutes;D_2__Clostridia;D_3__Clostridiales;D_4__Ruminococcaceae;D_5__Butyricicoccus	4911	81	22	237	3	63	0	156	25	39	29	244	79	615	217	69	50	64	630	250	256	79	41	29	36	47	13	115	127	104	46	647	79	18	90	94	0	64	96	34	23
D_0__Bacteria;D_1__Firmicutes;D_2__Clostridia;D_3__Clostridiales;D_4__Lachnospiraceae;D_5__uncultured	4865	106	45	273	124	37	0	115	65	64	0	267	71	177	206	427	5	82	1026	336	243	115	86	111	60	56	215	26	96	28	29	12	111	27	0	50	148	0	0	0	26
D_0__Bacteria;D_1__Bacteroidetes;D_2__Bacteroidia;D_3__Bacteroidales;D_4__Barnesiellaceae;D_5__Coprobacter	4850	56	67	10	0	20	0	6	136	10	0	286	165	0	7	35	57	1089	28	0	129	66	49	360	25	0	215	147	473	0	0	369	145	29	13	35	117	272	0	34	400
D_0__Bacteria;D_1__Firmicutes;D_2__Clostridia;D_3__Clostridiales;D_4__Lachnospiraceae;D_5__Lachnospiraceae UCG-010	4572	142	21	41	0	12	0	0	31	4	0	371	2	0	214	280	0	6	292	906	21	48	46	552	0	95	71	395	202	0	88	10	217	0	43	65	83	241	0	0	73
D_0__Bacteria;D_1__Firmicutes;D_2__Clostridia;D_3__Clostridiales;D_4__Ruminococcaceae;D_5__Ruminiclostridium 9	4466	114	64	54	501	56	0	28	79	38	138	14	29	35	64	76	14	110	44	433	124	166	74	119	49	46	158	196	231	91	17	783	63	14	0	50	185	159	39	11	0
D_0__Bacteria;D_1__Firmicutes;D_2__Clostridia;D_3__Clostridiales;D_4__Lachnospiraceae;D_5__CAG-56	4315	292	80	0	0	81	0	99	13	63	0	109	84	536	145	52	0	25	209	95	121	289	112	106	189	27	0	17	349	0	125	0	438	0	52	560	0	0	0	47	0
D_0__Bacteria;D_1__Firmicutes;D_2__Clostridia;D_3__Clostridiales;D_4__Ruminococcaceae;D_5__CAG-352	4203	0	0	0	0	0	0	0	0	0	0	0	0	0	87	671	0	0	0	0	0	0	0	0	2775	0	0	619	0	0	0	0	51	0	0	0	0	0	0	0	0
D_0__Bacteria;D_1__Bacteroidetes;D_2__Bacteroidia;D_3__Bacteroidales;D_4__Muribaculaceae;D_5__metagenome	4062	0	2402	0	0	0	0	2	0	0	0	0	0	0	697	0	0	0	0	0	0	0	0	91	0	0	0	0	0	0	0	0	0	0	0	146	0	0	0	724	0
D_0__Bacteria;D_1__Firmicutes;__;__;__;__	4007	6	697	12	0	479	0	94	0	412	9	0	0	132	0	0	812	482	0	0	192	0	0	0	257	0	0	0	0	0	0	0	0	0	92	53	213	0	65	0	0
D_0__Bacteria;D_1__Firmicutes;D_2__Clostridia;D_3__Clostridiales;D_4__Lachnospiraceae;D_5__Lachnospiraceae UCG-004	3890	26	48	44	254	53	0	0	55	0	64	27	193	0	163	0	23	0	0	893	124	0	190	90	13	0	0	2	2	605	0	819	70	0	2	55	75	0	0	0	0
D_0__Bacteria;D_1__Firmicutes;D_2__Clostridia;D_3__Clostridiales;D_4__Lachnospiraceae;D_5__[Ruminococcus] gnavus group	3788	0	0	6	154	0	0	0	0	32	174	0	6	2088	0	57	90	16	7	22	0	16	0	0	50	0	0	0	0	138	0	19	0	0	0	0	0	58	14	656	185
D_0__Bacteria;D_1__Actinobacteria;D_2__Coriobacteriia;D_3__Coriobacteriales;D_4__Eggerthellaceae;D_5__Enterorhabdus	3737	461	74	266	17	9	0	1048	20	25	0	162	37	198	76	17	38	12	63	49	213	28	129	89	515	55	44	34	6	10	8	14	0	20	0	0	0	0	0	0	0
D_0__Bacteria;D_1__Firmicutes;D_2__Clostridia;D_3__Clostridiales;D_4__Family XIII;D_5__[Eubacterium] nodatum group	3700	79	41	156	76	60	766	257	67	6	0	100	40	0	18	27	85	29	50	48	98	54	61	12	116	15	1191	40	17	11	11	0	0	117	23	0	0	0	0	14	15
D_0__Bacteria;D_1__Cyanobacteria;D_2__Oxyphotobacteria;D_3__Chloroplast;D_4__Gossypium arboreum;D_5__Gossypium arboreum	3577	0	8	0	1747	0	0	0	0	7	6	0	0	0	9	23	0	106	606	6	36	0	0	48	0	0	0	814	0	0	0	0	0	44	66	36	0	15	0	0	0
D_0__Bacteria;__;__;__;__;__	3560	2	22	30	660	2	0	2	11	0	0	20	260	0	318	0	0	3	6	0	2	10	18	66	3	0	216	128	3	101	28	0	906	0	728	0	0	0	2	0	13
D_0__Bacteria;D_1__Firmicutes;D_2__Clostridia;D_3__Clostridiales;D_4__Clostridiaceae 1;D_5__Clostridium sensu stricto 1	3546	323	757	33	0	7	81	68	47	126	11	0	109	0	0	21	0	21	0	0	84	75	24	6	418	6	17	313	35	0	23	715	0	159	0	0	25	0	0	42	0
D_0__Bacteria;D_1__Bacteroidetes;D_2__Bacteroidia;D_3__Bacteroidales;D_4__Prevotellaceae;D_5__Prevotellaceae UCG-001	3532	0	1244	0	5	5	49	18	0	0	0	0	3	0	27	778	0	0	0	0	0	0	0	0	0	43	4	5	0	0	0	0	0	0	1351	0	0	0	0	0	0
D_0__Bacteria;D_1__Firmicutes;D_2__Clostridia;D_3__Clostridiales;D_4__Clostridiales vadinBB60 group;D_5__gut metagenome	3123	690	137	15	73	85	0	0	307	103	0	23	84	0	44	43	14	0	5	0	154	196	12	210	0	0	0	701	13	0	9	0	205	0	0	0	0	0	0	0	0
D_0__Bacteria;D_1__Firmicutes;D_2__Clostridia;D_3__Clostridiales;D_4__Peptostreptococcaceae;D_5__uncultured	2995	100	481	17	43	7	13	145	197	200	0	0	91	0	23	60	0	67	35	0	57	82	0	0	618	0	24	130	48	0	0	240	269	37	0	0	11	0	0	0	0
D_0__Bacteria;D_1__Firmicutes;D_2__Clostridia;D_3__Clostridiales;D_4__Peptostreptococcaceae;D_5__Intestinibacter	2991	173	119	0	73	36	0	17	24	0	122	4	33	0	0	0	11	0	17	69	76	150	0	0	436	9	147	0	11	0	0	1464	0	0	0	0	0	0	0	0	0
D_0__Bacteria;D_1__Tenericutes;D_2__Mollicutes;D_3__Izimaplasmatales;D_4__uncultured organism;D_5__uncultured organism	2838	1131	0	27	750	0	0	0	0	0	0	37	134	0	0	539	0	0	0	0	152	0	0	6	0	0	0	54	0	0	0	0	0	8	0	0	0	0	0	0	0
D_0__Bacteria;D_1__Firmicutes;D_2__Clostridia;D_3__Clostridiales;D_4__Lachnospiraceae;D_5__Lachnospiraceae UCG-003	2794	0	0	0	0	0	0	0	207	501	0	0	440	0	0	598	0	0	0	0	0	0	0	522	0	0	0	526	0	0	0	0	0	0	0	0	0	0	0	0	0
D_0__Bacteria;D_1__Firmicutes;D_2__Erysipelotrichia;D_3__Erysipelotrichales;D_4__Erysipelotrichaceae;D_5__Holdemanella	2588	736	231	0	0	0	0	1347	0	0	0	0	0	0	51	0	0	0	0	0	8	0	0	0	215	0	0	0	0	0	0	0	0	0	0	0	0	0	0	0	0
D_0__Bacteria;D_1__Firmicutes;D_2__Clostridia;D_3__Clostridiales;D_4__Lachnospiraceae;D_5__Coprococcus 1	2387	106	44	294	0	44	0	244	46	0	0	130	47	143	27	41	0	0	160	0	93	125	27	56	188	0	79	18	40	106	34	42	146	0	31	76	0	0	0	0	0
D_0__Bacteria;D_1__Firmicutes;D_2__Clostridia;D_3__Clostridiales;D_4__Ruminococcaceae;D_5__Ruminiclostridium 5	2167	51	35	73	116	42	0	79	48	0	124	73	32	132	26	41	75	15	224	119	129	182	70	30	54	9	95	50	47	23	24	19	22	48	0	0	0	0	0	37	23
D_0__Bacteria;D_1__Firmicutes;D_2__Clostridia;D_3__Clostridiales;D_4__Ruminococcaceae;D_5__DTU089	2154	76	30	10	214	6	13	18	30	3	0	43	0	0	4	30	71	48	13	23	150	89	42	7	64	34	325	84	13	0	21	23	7	101	0	0	0	0	39	0	523
D_0__Bacteria;D_1__Firmicutes;D_2__Erysipelotrichia;D_3__Erysipelotrichales;D_4__Erysipelotrichaceae;D_5__Erysipelotrichaceae UCG-004	1884	0	28	25	31	0	0	0	119	11	0	0	0	0	0	17	0	0	0	0	0	0	0	0	0	11	0	1642	0	0	0	0	0	0	0	0	0	0	0	0	0
D_0__Bacteria;D_1__Firmicutes;D_2__Clostridia;D_3__Clostridiales;D_4__Lachnospiraceae;D_5__[Ruminococcus] gauvreauii group	1757	96	25	0	0	21	0	610	35	26	0	118	0	0	26	0	0	0	358	0	49	59	0	24	64	0	0	25	0	0	14	0	82	0	0	0	0	0	0	0	125
D_0__Bacteria;D_1__Firmicutes;D_2__Clostridia;D_3__Clostridiales;D_4__Ruminococcaceae;D_5__Negativibacillus	1687	142	0	5	200	17	0	0	26	0	0	0	0	0	9	0	0	57	0	8	195	187	0	80	54	81	349	51	68	0	0	0	60	0	0	29	0	36	33	0	0
D_0__Bacteria;D_1__Proteobacteria;D_2__Gammaproteobacteria;D_3__Pasteurellales;D_4__Pasteurellaceae;__	1678	78	0	0	0	0	0	0	283	11	506	27	39	0	71	151	0	46	0	0	4	173	0	4	0	0	0	18	0	42	0	76	149	0	0	0	0	0	0	0	0
D_0__Bacteria;D_1__Firmicutes;D_2__Clostridia;D_3__Clostridiales;__;__	1580	338	62	188	198	79	0	6	17	0	0	57	33	7	9	112	0	0	0	0	159	0	0	115	63	12	9	4	13	0	0	0	0	30	36	0	0	0	0	8	25
D_0__Bacteria;D_1__Actinobacteria;D_2__Coriobacteriia;D_3__Coriobacteriales;D_4__Eggerthellaceae;__	1565	0	0	0	0	0	0	0	0	0	0	0	0	1533	0	0	0	0	0	0	0	0	3	0	0	0	0	0	0	0	0	29	0	0	0	0	0	0	0	0	0
D_0__Bacteria;D_1__Firmicutes;D_2__Clostridia;D_3__Clostridiales;D_4__Lachnospiraceae;D_5__Tyzzerella 3	1530	0	0	0	144	0	0	11	0	0	0	0	0	417	0	20	0	0	203	0	0	0	112	0	0	0	54	0	47	293	107	0	87	0	35	0	0	0	0	0	0
D_0__Bacteria;D_1__Lentisphaerae;D_2__Lentisphaeria;D_3__Victivallales;D_4__vadinBE97;D_5__uncultured bacterium	1506	163	358	0	0	0	0	0	37	0	0	0	0	0	68	226	0	0	0	0	0	0	0	654	0	0	0	0	0	0	0	0	0	0	0	0	0	0	0	0	0
D_0__Bacteria;D_1__Bacteroidetes;D_2__Bacteroidia;D_3__Bacteroidales;D_4__Muribaculaceae;__	1468	0	0	1023	0	0	0	0	0	0	0	0	0	0	0	0	0	0	0	0	0	0	0	445	0	0	0	0	0	0	0	0	0	0	0	0	0	0	0	0	0
D_0__Bacteria;D_1__Firmicutes;D_2__Clostridia;D_3__Clostridiales;D_4__Lachnospiraceae;D_5__Anaerosporobacter	1448	0	0	0	0	0	0	0	1448	0	0	0	0	0	0	0	0	0	0	0	0	0	0	0	0	0	0	0	0	0	0	0	0	0	0	0	0	0	0	0	0
D_0__Bacteria;D_1__Firmicutes;D_2__Erysipelotrichia;D_3__Erysipelotrichales;D_4__Erysipelotrichaceae;D_5__Erysipelatoclostridium	1331	2	0	105	50	0	0	42	0	24	50	238	22	0	0	77	47	59	36	7	0	294	13	0	0	0	7	42	35	32	5	77	19	0	0	0	0	28	0	0	20
D_0__Bacteria;D_1__Firmicutes;D_2__Bacilli;D_3__Lactobacillales;D_4__Lactobacillaceae;D_5__Lactobacillus	1291	0	6	21	12	583	66	0	18	0	4	3	8	0	12	9	7	30	8	0	65	7	0	37	6	0	22	345	8	0	3	11	0	0	0	0	0	0	0	0	0
D_0__Bacteria;D_1__Firmicutes;D_2__Clostridia;D_3__Clostridiales;D_4__Lachnospiraceae;D_5__Tyzzerella 4	1288	0	0	0	0	0	0	0	0	0	0	0	0	0	0	0	0	0	0	0	0	762	0	0	274	0	0	0	0	0	0	0	0	0	0	0	0	183	0	0	69
D_0__Bacteria;D_1__Bacteroidetes;D_2__Bacteroidia;D_3__Bacteroidales;D_4__Prevotellaceae;D_5__Paraprevotella	1261	0	0	0	0	0	0	0	0	0	0	0	0	0	0	0	0	0	0	0	0	0	0	1261	0	0	0	0	0	0	0	0	0	0	0	0	0	0	0	0	0
D_0__Bacteria;D_1__Firmicutes;D_2__Clostridia;D_3__Clostridiales;D_4__Lachnospiraceae;D_5__Eisenbergiella	1155	9	0	16	44	0	0	12	0	0	0	20	0	0	0	0	34	31	0	10	122	163	0	77	6	0	423	47	0	76	0	0	0	0	41	0	0	0	24	0	0
D_0__Bacteria;D_1__Firmicutes;D_2__Negativicutes;D_3__Selenomonadales;D_4__Veillonellaceae;D_5__Megamonas	1120	0	0	0	0	0	0	0	0	0	0	0	0	856	0	240	0	0	0	0	0	0	0	0	0	0	0	0	0	0	0	0	24	0	0	0	0	0	0	0	0
D_0__Bacteria;D_1__Bacteroidetes;D_2__Bacteroidia;D_3__Bacteroidales;D_4__ML635J-40 aquatic group;__	1078	0	0	4	0	182	0	0	422	0	0	0	0	0	0	146	0	0	0	0	0	141	0	0	0	0	0	0	0	0	0	0	97	0	52	34	0	0	0	0	0
D_0__Bacteria;D_1__Firmicutes;D_2__Clostridia;D_3__Clostridiales;D_4__Family XIII;D_5__Family XIII AD3011 group	1039	14	148	0	0	0	0	424	67	0	0	4	0	0	5	0	0	0	0	0	0	16	0	84	192	14	0	50	0	0	0	0	0	0	6	15	0	0	0	0	0
D_0__Bacteria;D_1__Firmicutes;D_2__Erysipelotrichia;D_3__Erysipelotrichales;D_4__Erysipelotrichaceae;D_5__Turicibacter	946	24	166	0	0	0	0	0	3	89	0	476	26	0	0	0	0	0	0	0	81	0	0	0	44	0	6	12	5	0	0	14	0	0	0	0	0	0	0	0	0
D_0__Bacteria;D_1__Actinobacteria;D_2__Coriobacteriia;D_3__Coriobacteriales;D_4__Eggerthellaceae;D_5__Slackia	943	0	0	0	0	0	0	26	23	0	0	0	0	0	86	35	0	0	0	0	44	13	0	121	491	0	0	8	65	0	0	0	0	18	0	13	0	0	0	0	0
D_0__Bacteria;D_1__Firmicutes;D_2__Clostridia;D_3__Clostridiales;D_4__Clostridiales vadinBB60 group;__	936	653	7	5	10	0	0	0	17	0	0	0	0	0	0	166	0	0	0	0	23	0	0	6	0	0	0	49	0	0	0	0	0	0	0	0	0	0	0	0	0
D_0__Bacteria;D_1__Bacteroidetes;D_2__Bacteroidia;D_3__Bacteroidales;D_4__Prevotellaceae;D_5__uncultured	906	0	0	0	0	0	0	264	0	0	0	0	0	0	0	63	0	0	0	0	0	0	0	86	0	30	0	0	0	0	0	0	0	0	0	463	0	0	0	0	0
D_0__Bacteria;D_1__Firmicutes;D_2__Clostridia;D_3__Clostridiales;D_4__Lachnospiraceae;D_5__Lachnospiraceae FCS020 group	904	67	56	17	0	23	0	110	25	0	0	30	16	43	11	8	0	0	46	33	113	89	0	28	77	0	0	50	30	0	0	0	32	0	0	0	0	0	0	0	0
D_0__Bacteria;D_1__Lentisphaerae;D_2__Lentisphaeria;D_3__Victivallales;D_4__Victivallaceae;D_5__uncultured bacterium	902	0	734	13	0	0	0	0	0	0	0	0	60	0	0	73	0	0	0	0	0	0	0	8	14	0	0	0	0	0	0	0	0	0	0	0	0	0	0	0	0
D_0__Bacteria;D_1__Tenericutes;D_2__Mollicutes;D_3__Izimaplasmatales;D_4__gut metagenome;D_5__gut metagenome	894	0	184	0	0	0	0	0	670	0	0	0	0	0	19	0	0	0	0	0	0	0	0	21	0	0	0	0	0	0	0	0	0	0	0	0	0	0	0	0	0
D_0__Bacteria;D_1__Firmicutes;D_2__Clostridia;D_3__Clostridiales;D_4__Lachnospiraceae;D_5__Marvinbryantia	862	45	14	66	0	32	0	43	0	0	0	22	0	70	0	0	0	0	11	0	75	4	7	82	186	12	0	15	57	0	24	46	0	0	0	51	0	0	0	0	0
D_0__Bacteria;D_1__Firmicutes;D_2__Clostridia;D_3__Clostridiales;D_4__Lachnospiraceae;D_5__GCA-900066575	802	13	34	10	89	9	0	5	25	0	0	26	0	0	293	23	0	22	30	0	28	25	3	42	19	0	0	14	39	0	9	14	30	0	0	0	0	0	0	0	0
D_0__Bacteria;D_1__Cyanobacteria;D_2__Melainabacteria;__;__;__	796	0	333	0	0	0	0	0	0	0	0	0	0	0	0	102	0	0	0	0	0	0	0	361	0	0	0	0	0	0	0	0	0	0	0	0	0	0	0	0	0
D_0__Bacteria;D_1__Actinobacteria;D_2__Coriobacteriia;D_3__Coriobacteriales;D_4__Eggerthellaceae;D_5__Eggerthella	790	0	0	37	104	17	0	0	0	3	73	30	0	5	0	18	22	26	7	54	6	15	0	0	0	0	94	0	14	92	0	157	0	0	0	0	0	16	0	0	0
D_0__Bacteria;D_1__Proteobacteria;D_2__Gammaproteobacteria;D_3__Enterobacteriales;D_4__Enterobacteriaceae;__	759	0	88	0	120	0	43	0	0	0	50	0	0	0	0	4	0	0	0	0	0	0	0	121	0	0	0	11	0	0	0	0	322	0	0	0	0	0	0	0	0
D_0__Bacteria;D_1__Firmicutes;D_2__Clostridia;D_3__Clostridiales;D_4__Lachnospiraceae;D_5__Syntrophococcus	751	71	76	0	0	10	0	8	68	0	0	0	0	0	13	0	0	0	25	111	0	0	0	114	8	0	0	0	102	0	0	45	100	0	0	0	0	0	0	0	0
D_0__Bacteria;D_1__Firmicutes;D_2__Clostridia;D_3__Clostridiales;D_4__Lachnospiraceae;D_5__[Bacteroides] pectinophilus group	745	0	745	0	0	0	0	0	0	0	0	0	0	0	0	0	0	0	0	0	0	0	0	0	0	0	0	0	0	0	0	0	0	0	0	0	0	0	0	0	0
D_0__Bacteria;D_1__Actinobacteria;D_2__Coriobacteriia;D_3__OPB41;D_4__uncultured bacterium;D_5__uncultured bacterium	743	0	0	149	0	0	0	3	0	0	0	43	20	0	0	95	25	0	0	8	0	0	0	0	0	0	0	212	10	0	0	0	91	77	0	0	0	10	0	0	0
D_0__Bacteria;D_1__Proteobacteria;D_2__Alphaproteobacteria;__;__;__	742	0	624	115	0	0	0	0	0	3	0	0	0	0	0	0	0	0	0	0	0	0	0	0	0	0	0	0	0	0	0	0	0	0	0	0	0	0	0	0	0
D_0__Bacteria;D_1__Firmicutes;D_2__Clostridia;D_3__Clostridiales;D_4__Lachnospiraceae;D_5__Moryella	699	10	0	83	69	10	0	5	12	0	0	24	11	0	7	0	0	72	34	0	0	0	0	6	18	0	106	7	15	19	11	0	43	0	0	19	12	91	15	0	0
D_0__Bacteria;D_1__Firmicutes;D_2__Clostridia;D_3__Clostridiales;D_4__Lachnospiraceae;D_5__Tyzzerella	620	6	6	6	0	0	0	9	0	0	0	0	0	11	0	0	0	94	0	0	21	0	203	0	20	0	124	12	0	91	0	0	0	0	0	0	0	17	0	0	0
D_0__Bacteria;D_1__Firmicutes;D_2__Erysipelotrichia;D_3__Erysipelotrichales;D_4__Erysipelotrichaceae;D_5__Faecalitalea	619	78	4	7	35	0	0	0	0	9	0	0	61	3	0	9	0	7	0	33	122	42	4	0	94	0	13	62	29	0	0	7	0	0	0	0	0	0	0	0	0
D_0__Bacteria;D_1__Lentisphaerae;D_2__Lentisphaeria;D_3__Victivallales;D_4__GWF2-44-16;D_5__uncultured bacterium	577	0	0	100	0	0	0	0	0	0	0	0	0	0	38	295	0	0	0	0	0	0	0	6	0	0	0	0	0	0	0	0	0	0	0	138	0	0	0	0	0
D_0__Bacteria;D_1__Verrucomicrobia;D_2__Verrucomicrobiae;D_3__Opitutales;D_4__Puniceicoccaceae;D_5__uncultured	520	189	179	0	0	0	0	0	0	0	0	0	0	0	0	65	0	0	0	0	0	0	0	8	0	0	0	79	0	0	0	0	0	0	0	0	0	0	0	0	0
D_0__Bacteria;D_1__Proteobacteria;D_2__Gammaproteobacteria;D_3__Betaproteobacteriales;D_4__Burkholderiaceae;D_5__Oxalobacter	491	0	8	40	272	16	0	0	0	0	0	0	0	0	12	15	0	0	0	0	0	50	0	52	26	0	0	0	0	0	0	0	0	0	0	0	0	0	0	0	0
D_0__Bacteria;D_1__Firmicutes;D_2__Clostridia;D_3__Clostridiales;D_4__Peptococcaceae;D_5__Peptococcus	464	50	70	20	43	0	0	0	114	0	0	28	0	0	0	0	0	0	0	0	22	0	0	25	0	3	0	70	0	0	0	0	0	0	0	19	0	0	0	0	0
D_0__Bacteria;D_1__Firmicutes;D_2__Erysipelotrichia;D_3__Erysipelotrichales;D_4__Erysipelotrichaceae;D_5__Catenibacterium	446	0	0	0	0	0	0	0	174	0	0	0	0	0	0	0	0	0	0	0	251	0	0	0	21	0	0	0	0	0	0	0	0	0	0	0	0	0	0	0	0
D_0__Bacteria;D_1__Actinobacteria;D_2__Coriobacteriia;__;__;__	435	0	0	0	0	51	0	0	21	0	0	11	0	0	0	0	0	0	303	0	0	0	0	8	41	0	0	0	0	0	0	0	0	0	0	0	0	0	0	0	0
D_0__Bacteria;D_1__Firmicutes;D_2__Negativicutes;D_3__Selenomonadales;D_4__Veillonellaceae;D_5__Megasphaera	387	0	0	0	0	140	130	0	0	0	0	0	0	0	0	0	0	0	0	0	0	0	0	0	0	0	0	0	0	0	0	0	0	0	0	0	0	0	117	0	0
D_0__Bacteria;D_1__Firmicutes;D_2__Erysipelotrichia;D_3__Erysipelotrichales;D_4__Erysipelotrichaceae;__	382	38	0	17	5	0	4	0	0	0	0	19	0	0	14	14	0	0	0	22	18	48	4	3	20	0	61	57	0	16	4	11	7	0	0	0	0	0	0	0	0
D_0__Bacteria;D_1__Firmicutes;D_2__Bacilli;D_3__Lactobacillales;D_4__Enterococcaceae;D_5__Enterococcus	347	0	0	0	30	0	132	0	0	0	0	0	12	0	23	0	59	0	0	0	0	17	11	0	0	0	4	17	42	0	0	0	0	0	0	0	0	0	0	0	0
D_0__Bacteria;D_1__Synergistetes;D_2__Synergistia;D_3__Synergistales;D_4__Synergistaceae;D_5__Synergistes	323	5	0	0	215	0	0	6	0	0	0	0	0	0	0	0	0	0	0	0	0	0	0	32	65	0	0	0	0	0	0	0	0	0	0	0	0	0	0	0	0
D_0__Bacteria;D_1__Firmicutes;D_2__Clostridia;D_3__Clostridiales;D_4__Lachnospiraceae;D_5__Sellimonas	314	0	0	65	88	0	0	0	0	0	0	0	0	0	0	8	36	68	0	0	0	41	0	0	0	0	8	0	0	0	0	0	0	0	0	0	0	0	0	0	0
D_0__Bacteria;D_1__Firmicutes;D_2__Clostridia;D_3__Clostridiales;D_4__Lachnospiraceae;D_5__Hungatella	308	0	0	0	22	7	0	0	0	0	14	0	0	0	0	0	0	0	0	12	0	15	0	0	134	20	2	0	0	82	0	0	0	0	0	0	0	0	0	0	0
D_0__Bacteria;D_1__Firmicutes;D_2__Erysipelotrichia;D_3__Erysipelotrichales;D_4__Erysipelotrichaceae;D_5__[Anaerorhabdus] furcosa group	305	0	0	15	37	6	0	12	0	7	0	11	4	0	0	0	0	0	10	0	0	0	15	13	25	0	55	8	15	55	0	0	0	0	0	0	17	0	0	0	0
D_0__Bacteria;D_1__Firmicutes;D_2__Clostridia;D_3__Clostridiales;D_4__Defluviitaleaceae;D_5__Defluviitaleaceae UCG-011	287	22	6	20	0	4	0	0	15	3	0	0	0	0	0	0	0	0	0	33	65	4	0	6	7	0	35	39	14	0	0	0	0	14	0	0	0	0	0	0	0
D_0__Bacteria;D_1__Proteobacteria;D_2__Alphaproteobacteria;D_3__Rickettsiales;D_4__Mitochondria;__	281	2	4	2	157	0	0	0	0	0	0	0	0	0	0	0	0	0	54	0	0	0	2	0	0	0	0	60	0	0	0	0	0	0	0	0	0	0	0	0	0
D_0__Bacteria;D_1__Actinobacteria;D_2__Coriobacteriia;D_3__Coriobacteriales;D_4__Atopobiaceae;D_5__Coriobacteriaceae UCG-003	260	0	5	0	0	0	0	0	0	0	0	0	0	0	46	0	0	0	0	0	136	0	0	9	41	7	0	0	16	0	0	0	0	0	0	0	0	0	0	0	0
D_0__Bacteria;D_1__Firmicutes;D_2__Clostridia;D_3__Clostridiales;D_4__Peptococcaceae;D_5__uncultured	257	8	0	67	11	14	0	11	14	0	0	33	4	0	4	0	0	0	0	0	20	9	0	8	22	0	10	4	0	0	0	0	0	18	0	0	0	0	0	0	0
D_0__Bacteria;D_1__Proteobacteria;D_2__Gammaproteobacteria;D_3__Pasteurellales;D_4__Pasteurellaceae;D_5__Aggregatibacter	252	0	0	0	0	0	0	0	66	0	18	0	0	0	0	0	0	22	12	0	0	0	0	0	0	0	0	0	0	16	0	0	118	0	0	0	0	0	0	0	0
D_0__Bacteria;D_1__Firmicutes;D_2__Clostridia;D_3__Clostridiales;D_4__Ruminococcaceae;D_5__Intestinimonas	244	17	16	0	0	0	0	0	32	0	0	0	0	0	0	0	0	0	0	0	0	15	72	9	21	0	3	15	0	0	0	0	16	24	0	0	0	0	4	0	0
D_0__Bacteria;D_1__Firmicutes;D_2__Clostridia;D_3__Clostridiales;D_4__Ruminococcaceae;D_5__Ruminiclostridium 1	236	111	0	0	34	0	0	0	0	0	0	0	0	0	0	50	0	0	0	0	0	0	0	13	22	0	0	0	0	0	0	0	0	0	0	6	0	0	0	0	0
D_0__Bacteria;D_1__Firmicutes;D_2__Clostridia;D_3__Clostridiales;D_4__Lachnospiraceae;D_5__Lachnospiraceae NK3A20 group	230	0	230	0	0	0	0	0	0	0	0	0	0	0	0	0	0	0	0	0	0	0	0	0	0	0	0	0	0	0	0	0	0	0	0	0	0	0	0	0	0
D_0__Bacteria;D_1__Bacteroidetes;D_2__Bacteroidia;D_3__Bacteroidales;D_4__Prevotellaceae;D_5__Prevotella 2	225	0	0	0	0	0	0	16	0	0	0	0	0	0	0	0	0	0	0	0	4	0	0	6	48	0	0	0	0	0	0	0	0	0	0	151	0	0	0	0	0
D_0__Bacteria;D_1__Firmicutes;D_2__Clostridia;D_3__Clostridiales;D_4__Clostridiales vadinBB60 group;D_5__uncultured organism	222	6	0	77	0	0	0	0	6	0	0	0	0	0	0	0	0	0	0	0	0	0	0	0	0	0	0	0	0	0	0	0	0	0	0	133	0	0	0	0	0
D_0__Bacteria;D_1__Firmicutes;D_2__Clostridia;D_3__Clostridiales;D_4__Lachnospiraceae;D_5__Lachnospiraceae UCG-008	215	22	19	12	0	0	0	9	8	0	0	0	0	0	0	0	0	0	0	0	35	0	0	14	24	0	0	33	0	0	6	0	33	0	0	0	0	0	0	0	0
D_0__Bacteria;D_1__Firmicutes;D_2__Clostridia;D_3__Clostridiales;D_4__Lachnospiraceae;D_5__UC5-1-2E3	188	0	0	67	19	0	0	14	0	0	0	9	0	0	0	16	0	23	0	0	0	0	0	0	0	0	40	0	0	0	0	0	0	0	0	0	0	0	0	0	0
D_0__Bacteria;D_1__Firmicutes;D_2__Clostridia;D_3__Clostridiales;D_4__Lachnospiraceae;D_5__Lachnospiraceae UCG-006	186	0	0	0	0	0	0	0	0	0	0	0	0	0	0	0	0	0	0	0	0	0	0	0	0	0	0	186	0	0	0	0	0	0	0	0	0	0	0	0	0
D_0__Bacteria;D_1__Fusobacteria;D_2__Fusobacteriia;D_3__Fusobacteriales;D_4__Fusobacteriaceae;D_5__Fusobacterium	183	0	0	0	5	0	42	0	0	0	81	0	0	7	0	0	0	0	0	0	0	9	0	0	23	0	0	0	0	0	0	0	0	0	0	0	0	0	0	0	16
D_0__Bacteria;D_1__Firmicutes;D_2__Clostridia;D_3__Clostridiales;D_4__Ruminococcaceae;D_5__Oscillospira	182	0	16	8	0	0	0	0	0	7	0	0	8	0	8	17	0	22	2	0	0	0	0	0	3	0	0	50	0	0	0	0	26	15	0	0	0	0	0	0	0
D_0__Bacteria;D_1__Tenericutes;D_2__Mollicutes;D_3__Mollicutes RF39;D_4__uncultured bacterium;D_5__uncultured bacterium	174	0	14	95	0	0	0	0	6	0	0	11	0	0	0	0	0	0	18	0	0	0	0	0	14	0	0	16	0	0	0	0	0	0	0	0	0	0	0	0	0
D_0__Bacteria;D_1__Patescibacteria;D_2__Saccharimonadia;D_3__Saccharimonadales;D_4__uncultured bacterium SBR2096;D_5__uncultured bacterium SBR2096	168	0	0	0	21	0	0	35	30	0	0	8	10	15	0	3	0	6	0	0	0	5	0	13	9	0	0	0	9	4	0	0	0	0	0	0	0	0	0	0	0
D_0__Bacteria;D_1__Bacteroidetes;D_2__Bacteroidia;__;__;__	156	0	0	0	0	0	0	0	0	0	0	0	0	0	0	0	0	0	0	0	0	0	0	156	0	0	0	0	0	0	0	0	0	0	0	0	0	0	0	0	0
D_0__Bacteria;D_1__Firmicutes;D_2__Clostridia;D_3__Clostridiales;D_4__Ruminococcaceae;D_5__Fournierella	150	0	0	23	0	0	0	0	0	0	0	0	0	0	0	0	0	82	0	0	0	6	0	5	9	0	0	0	0	0	0	0	0	25	0	0	0	0	0	0	0
D_0__Bacteria;D_1__Firmicutes;D_2__Erysipelotrichia;D_3__Erysipelotrichales;D_4__Erysipelotrichaceae;D_5__[Clostridium] innocuum group	137	0	0	27	8	0	9	0	0	4	16	5	0	0	0	6	0	6	0	11	0	7	0	0	0	0	5	0	0	19	0	14	0	0	0	0	0	0	0	0	0
D_0__Bacteria;D_1__Epsilonbacteraeota;D_2__Campylobacteria;D_3__Campylobacterales;D_4__Campylobacteraceae;D_5__Campylobacter	135	0	0	0	0	0	0	0	0	0	113	0	0	0	0	0	0	0	0	0	0	5	0	0	0	0	0	0	6	4	0	4	3	0	0	0	0	0	0	0	0
D_0__Bacteria;D_1__Proteobacteria;D_2__Gammaproteobacteria;D_3__Enterobacteriales;D_4__Enterobacteriaceae;D_5__Enterobacter	133	0	133	0	0	0	0	0	0	0	0	0	0	0	0	0	0	0	0	0	0	0	0	0	0	0	0	0	0	0	0	0	0	0	0	0	0	0	0	0	0
D_0__Bacteria;D_1__Firmicutes;D_2__Clostridia;D_3__Clostridiales;D_4__Clostridiaceae 1;D_5__Clostridium sensu stricto 3	121	20	4	0	0	6	0	0	0	8	0	0	12	0	0	0	0	0	0	0	7	19	0	0	45	0	0	0	0	0	0	0	0	0	0	0	0	0	0	0	0
D_0__Bacteria;D_1__Firmicutes;D_2__Clostridia;D_3__Clostridiales;D_4__Ruminococcaceae;D_5__Ruminococcaceae UCG-009	116	0	8	0	0	0	0	0	0	0	0	0	0	0	0	0	0	0	0	0	0	0	0	108	0	0	0	0	0	0	0	0	0	0	0	0	0	0	0	0	0
D_0__Bacteria;D_1__Firmicutes;D_2__Clostridia;D_3__Clostridiales;D_4__Ruminococcaceae;D_5__Anaerofilum	113	0	3	13	0	0	0	9	0	0	0	17	9	0	5	0	0	0	0	0	11	0	7	0	23	3	0	0	13	0	0	0	0	0	0	0	0	0	0	0	0
D_0__Bacteria;D_1__Actinobacteria;D_2__Coriobacteriia;D_3__Coriobacteriales;D_4__Atopobiaceae;D_5__uncultured	105	9	0	0	0	0	0	37	0	0	0	0	3	0	0	7	0	0	13	0	0	0	0	13	16	4	0	3	0	0	0	0	0	0	0	0	0	0	0	0	0
D_0__Bacteria;D_1__Firmicutes;D_2__Erysipelotrichia;D_3__Erysipelotrichales;D_4__Erysipelotrichaceae;D_5__Solobacterium	96	0	96	0	0	0	0	0	0	0	0	0	0	0	0	0	0	0	0	0	0	0	0	0	0	0	0	0	0	0	0	0	0	0	0	0	0	0	0	0	0
D_0__Bacteria;D_1__Actinobacteria;D_2__Coriobacteriia;D_3__Coriobacteriales;D_4__Atopobiaceae;__	87	0	0	0	0	0	0	0	0	0	0	0	0	0	0	0	85	0	0	0	0	0	0	0	0	0	0	0	0	0	0	2	0	0	0	0	0	0	0	0	0
D_0__Bacteria;D_1__Actinobacteria;D_2__Coriobacteriia;D_3__Coriobacteriales;D_4__Atopobiaceae;D_5__Coriobacteriaceae UCG-002	84	0	0	0	0	0	0	36	0	0	0	0	0	0	0	0	28	0	0	0	12	0	0	0	0	0	0	8	0	0	0	0	0	0	0	0	0	0	0	0	0
D_0__Bacteria;D_1__Firmicutes;D_2__Clostridia;D_3__Clostridiales;D_4__Ruminococcaceae;D_5__Ruminococcaceae UCG-008	84	0	0	0	0	0	0	73	0	0	0	0	0	0	0	0	0	0	0	0	0	0	0	0	0	0	0	11	0	0	0	0	0	0	0	0	0	0	0	0	0
D_0__Bacteria;D_1__Firmicutes;D_2__Clostridia;D_3__Clostridiales;D_4__Family XIII;D_5__Family XIII UCG-001	80	0	17	0	0	0	0	0	0	0	0	0	0	0	0	0	0	0	0	0	0	0	0	17	23	0	0	0	0	0	0	0	23	0	0	0	0	0	0	0	0
D_0__Bacteria;D_1__Actinobacteria;D_2__Actinobacteria;D_3__Actinomycetales;D_4__Actinomycetaceae;D_5__Actinomyces	75	0	0	0	0	0	0	31	0	0	0	12	0	0	6	4	0	0	0	0	0	12	0	0	7	0	3	0	0	0	0	0	0	0	0	0	0	0	0	0	0
D_0__Bacteria;D_1__Actinobacteria;D_2__Actinobacteria;D_3__Micrococcales;__;__	70	0	0	0	7	0	8	0	0	0	0	0	0	0	19	13	0	5	0	0	0	5	0	0	0	0	0	13	0	0	0	0	0	0	0	0	0	0	0	0	0
D_0__Bacteria;D_1__Firmicutes;D_2__Clostridia;D_3__Clostridiales;D_4__Lachnospiraceae;D_5__Epulopiscium	67	0	13	0	0	0	0	0	0	0	0	0	0	0	0	0	0	0	0	0	21	0	0	0	28	0	0	0	5	0	0	0	0	0	0	0	0	0	0	0	0
D_0__Bacteria;D_1__Firmicutes;D_2__Bacilli;D_3__Lactobacillales;__;__	64	0	0	8	0	0	0	0	0	0	9	0	0	0	13	10	0	14	0	0	0	0	0	0	3	0	0	0	0	0	0	7	0	0	0	0	0	0	0	0	0
D_0__Bacteria;D_1__Firmicutes;D_2__Clostridia;D_3__Clostridiales;D_4__Lachnospiraceae;D_5__Acetitomaculum	63	0	11	0	0	0	0	0	0	7	0	0	0	0	20	0	0	0	0	0	0	0	0	25	0	0	0	0	0	0	0	0	0	0	0	0	0	0	0	0	0
D_0__Bacteria;D_1__Firmicutes;D_2__Erysipelotrichia;D_3__Erysipelotrichales;D_4__Erysipelotrichaceae;D_5__Coprobacillus	63	0	0	0	0	0	0	0	0	0	0	0	0	15	0	6	0	0	0	0	0	10	0	10	19	3	0	0	0	0	0	0	0	0	0	0	0	0	0	0	0
D_0__Bacteria;D_1__Firmicutes;D_2__Bacilli;D_3__Lactobacillales;D_4__Streptococcaceae;D_5__Lactococcus	52	0	0	0	0	0	8	15	0	0	0	0	7	0	0	0	0	0	0	0	9	0	4	4	0	0	0	5	0	0	0	0	0	0	0	0	0	0	0	0	0
D_0__Bacteria;D_1__Firmicutes;D_2__Clostridia;D_3__Clostridiales;D_4__Lachnospiraceae;D_5__Shuttleworthia	51	11	0	0	0	4	0	0	0	0	0	36	0	0	0	0	0	0	0	0	0	0	0	0	0	0	0	0	0	0	0	0	0	0	0	0	0	0	0	0	0
D_0__Bacteria;D_1__Bacteroidetes;D_2__Bacteroidia;D_3__Bacteroidales;D_4__Rikenellaceae;D_5__Rikenella	49	0	4	22	0	0	0	0	15	0	0	0	0	0	0	0	0	0	0	0	0	0	0	8	0	0	0	0	0	0	0	0	0	0	0	0	0	0	0	0	0
D_0__Bacteria;D_1__Firmicutes;D_2__Clostridia;D_3__Clostridiales;D_4__Family XIII;D_5__[Eubacterium] brachy group	48	0	0	0	7	0	0	0	0	0	0	0	0	0	0	0	0	4	0	0	5	18	0	0	0	0	0	0	0	0	0	14	0	0	0	0	0	0	0	0	0
D_0__Bacteria;D_1__Firmicutes;D_2__Erysipelotrichia;D_3__Erysipelotrichales;D_4__Erysipelotrichaceae;D_5__Dielma	46	0	0	34	0	0	0	4	0	8	0	0	0	0	0	0	0	0	0	0	0	0	0	0	0	0	0	0	0	0	0	0	0	0	0	0	0	0	0	0	0
D_0__Bacteria;D_1__Firmicutes;D_2__Clostridia;D_3__Clostridiales;D_4__Ruminococcaceae;D_5__GCA-900066225	40	0	0	0	0	0	0	17	0	0	0	5	0	0	0	0	0	0	0	0	0	18	0	0	0	0	0	0	0	0	0	0	0	0	0	0	0	0	0	0	0
D_0__Bacteria;D_1__Proteobacteria;D_2__Gammaproteobacteria;D_3__Betaproteobacteriales;D_4__Nitrosomonadaceae;D_5__Nitrosomonas	38	0	0	0	0	0	0	0	0	0	0	0	0	0	0	0	0	0	0	0	0	0	0	0	0	0	38	0	0	0	0	0	0	0	0	0	0	0	0	0	0
D_0__Bacteria;D_1__Proteobacteria;D_2__Gammaproteobacteria;D_3__Pseudomonadales;D_4__Pseudomonadaceae;D_5__Pseudomonas	31	0	0	0	0	0	0	0	0	0	0	0	0	0	0	8	0	0	0	0	0	16	0	7	0	0	0	0	0	0	0	0	0	0	0	0	0	0	0	0	0
D_0__Bacteria;D_1__Proteobacteria;D_2__Gammaproteobacteria;__;__;__	28	0	0	0	0	0	0	0	0	0	0	0	0	0	0	28	0	0	0	0	0	0	0	0	0	0	0	0	0	0	0	0	0	0	0	0	0	0	0	0	0
D_0__Bacteria;D_1__Firmicutes;D_2__Bacilli;D_3__Bacillales;D_4__Family XI;D_5__Gemella	27	0	0	0	0	0	7	0	0	0	0	0	0	0	10	0	0	4	0	0	0	0	0	0	6	0	0	0	0	0	0	0	0	0	0	0	0	0	0	0	0
D_0__Bacteria;D_1__Firmicutes;D_2__Clostridia;D_3__Clostridiales;D_4__Family XIII;D_5__Anaerovorax	25	0	0	0	25	0	0	0	0	0	0	0	0	0	0	0	0	0	0	0	0	0	0	0	0	0	0	0	0	0	0	0	0	0	0	0	0	0	0	0	0
D_0__Bacteria;D_1__Firmicutes;D_2__Clostridia;D_3__Clostridiales;D_4__Clostridiaceae 1;__	24	0	5	0	0	0	0	0	0	2	0	0	0	0	0	0	0	0	0	0	10	0	0	0	0	0	0	0	2	0	0	5	0	0	0	0	0	0	0	0	0
D_0__Bacteria;D_1__Firmicutes;D_2__Clostridia;D_3__Clostridiales;D_4__Lachnospiraceae;D_5__Lachnoclostridium 5	24	0	0	0	17	0	0	0	0	0	0	0	0	0	0	0	0	0	0	0	0	0	0	0	0	0	0	0	0	7	0	0	0	0	0	0	0	0	0	0	0
D_0__Bacteria;D_1__Firmicutes;D_2__Clostridia;D_3__Clostridiales;D_4__Lachnospiraceae;D_5__GCA-900066755	22	0	0	0	0	0	0	0	0	0	0	0	0	0	0	0	0	0	0	6	0	8	8	0	0	0	0	0	0	0	0	0	0	0	0	0	0	0	0	0	0
D_0__Bacteria;D_1__Firmicutes;D_2__Clostridia;D_3__Clostridiales;D_4__Peptococcaceae;D_5__Desulfotomaculum	22	0	0	0	0	0	0	0	0	0	0	0	0	0	0	0	0	15	0	7	0	0	0	0	0	0	0	0	0	0	0	0	0	0	0	0	0	0	0	0	0
D_0__Bacteria;D_1__Firmicutes;D_2__Clostridia;D_3__Clostridiales;D_4__Clostridiales vadinBB60 group;D_5__metagenome	21	0	0	0	0	0	0	0	0	0	0	0	0	0	0	0	0	0	0	0	21	0	0	0	0	0	0	0	0	0	0	0	0	0	0	0	0	0	0	0	0
D_0__Bacteria;D_1__Actinobacteria;D_2__Actinobacteria;D_3__Corynebacteriales;D_4__Corynebacteriaceae;__	19	0	0	0	0	0	0	0	0	0	0	0	0	0	0	0	0	0	0	0	0	0	0	0	0	0	0	19	0	0	0	0	0	0	0	0	0	0	0	0	0
D_0__Bacteria;D_1__Bacteroidetes;D_2__Bacteroidia;D_3__Bacteroidales;D_4__Prevotellaceae;D_5__Prevotella 7	19	0	0	0	0	0	0	19	0	0	0	0	0	0	0	0	0	0	0	0	0	0	0	0	0	0	0	0	0	0	0	0	0	0	0	0	0	0	0	0	0
D_0__Bacteria;D_1__Firmicutes;D_2__Clostridia;D_3__Clostridiales;D_4__Eubacteriaceae;D_5__Anaerofustis	19	0	0	12	0	0	0	0	0	0	4	0	0	0	0	0	0	0	0	0	0	0	0	3	0	0	0	0	0	0	0	0	0	0	0	0	0	0	0	0	0
D_0__Bacteria;D_1__Firmicutes;D_2__Clostridia;D_3__Clostridiales;D_4__Lachnospiraceae;D_5__[Eubacterium] fissicatena group	19	0	0	0	0	0	0	0	0	0	0	0	0	0	0	0	0	0	0	0	0	10	5	0	0	0	0	0	0	0	0	4	0	0	0	0	0	0	0	0	0
D_0__Bacteria;D_1__Cyanobacteria;D_2__Oxyphotobacteria;D_3__Chloroplast;D_4__Dioscorea alata;D_5__Dioscorea alata	18	0	0	0	0	0	0	0	0	0	0	0	0	6	0	0	0	0	0	0	0	0	12	0	0	0	0	0	0	0	0	0	0	0	0	0	0	0	0	0	0
D_0__Bacteria;D_1__Firmicutes;D_2__Bacilli;D_3__Lactobacillales;D_4__Leuconostocaceae;D_5__Leuconostoc	18	0	0	0	0	0	0	0	0	0	0	0	0	0	16	0	0	0	0	0	0	0	2	0	0	0	0	0	0	0	0	0	0	0	0	0	0	0	0	0	0
D_0__Bacteria;D_1__Proteobacteria;D_2__Gammaproteobacteria;D_3__Betaproteobacteriales;D_4__Burkholderiaceae;D_5__Comamonas	17	0	0	0	0	0	0	0	17	0	0	0	0	0	0	0	0	0	0	0	0	0	0	0	0	0	0	0	0	0	0	0	0	0	0	0	0	0	0	0	0
D_0__Bacteria;D_1__Patescibacteria;D_2__Saccharimonadia;D_3__Saccharimonadales;D_4__Saccharimonadaceae;__	16	0	0	0	0	0	0	0	0	0	0	3	0	0	0	0	0	0	0	0	0	0	0	0	0	0	0	0	0	0	0	0	13	0	0	0	0	0	0	0	0
D_0__Bacteria;D_1__Bacteroidetes;D_2__Bacteroidia;D_3__Bacteroidales;D_4__Porphyromonadaceae;D_5__Porphyromonas	15	0	0	0	0	0	0	0	0	0	0	0	0	0	0	15	0	0	0	0	0	0	0	0	0	0	0	0	0	0	0	0	0	0	0	0	0	0	0	0	0
D_0__Bacteria;D_1__Firmicutes;D_2__Clostridia;D_3__Clostridiales;D_4__Peptococcaceae;__	15	0	0	4	0	0	0	0	0	0	0	0	0	0	0	5	0	0	0	0	0	0	0	0	0	6	0	0	0	0	0	0	0	0	0	0	0	0	0	0	0
D_0__Bacteria;D_1__Firmicutes;D_2__Bacilli;D_3__Lactobacillales;D_4__Streptococcaceae;D_5__Anthococcus	14	0	0	0	0	0	14	0	0	0	0	0	0	0	0	0	0	0	0	0	0	0	0	0	0	0	0	0	0	0	0	0	0	0	0	0	0	0	0	0	0
D_0__Bacteria;D_1__Firmicutes;D_2__Clostridia;D_3__Clostridiales;D_4__Lachnospiraceae;D_5__[Eubacterium] oxidoreducens group	14	0	0	0	0	0	0	0	2	0	0	0	0	0	0	0	0	0	0	4	0	0	0	0	0	0	6	0	0	0	0	2	0	0	0	0	0	0	0	0	0
D_0__Bacteria;D_1__Firmicutes;D_2__Clostridia;D_3__Clostridiales;D_4__Syntrophomonadaceae;D_5__Pelospora	13	0	0	8	0	0	0	0	5	0	0	0	0	0	0	0	0	0	0	0	0	0	0	0	0	0	0	0	0	0	0	0	0	0	0	0	0	0	0	0	0
D_0__Bacteria;D_1__Firmicutes;D_2__Bacilli;D_3__Lactobacillales;D_4__Leuconostocaceae;D_5__Weissella	12	0	0	0	0	0	0	0	0	0	0	0	0	0	0	0	0	0	0	0	0	0	7	0	0	0	0	0	0	0	5	0	0	0	0	0	0	0	0	0	0
D_0__Bacteria;D_1__Firmicutes;D_2__Clostridia;D_3__Clostridiales;D_4__Clostridiaceae 1;D_5__Sarcina	12	0	0	0	0	8	0	0	0	0	0	0	0	0	0	4	0	0	0	0	0	0	0	0	0	0	0	0	0	0	0	0	0	0	0	0	0	0	0	0	0
D_0__Bacteria;D_1__Cyanobacteria;D_2__Oxyphotobacteria;D_3__Chloroplast;__;__	10	0	0	0	10	0	0	0	0	0	0	0	0	0	0	0	0	0	0	0	0	0	0	0	0	0	0	0	0	0	0	0	0	0	0	0	0	0	0	0	0
D_0__Bacteria;D_1__Firmicutes;D_2__Clostridia;D_3__Clostridiales;D_4__Christensenellaceae;D_5__uncultured	10	0	3	0	0	0	0	0	0	0	0	0	0	0	0	0	0	0	0	0	0	7	0	0	0	0	0	0	0	0	0	0	0	0	0	0	0	0	0	0	0
D_0__Bacteria;D_1__Firmicutes;D_2__Negativicutes;D_3__Selenomonadales;D_4__Veillonellaceae;D_5__Selenomonas 3	10	0	0	0	0	0	0	0	0	0	10	0	0	0	0	0	0	0	0	0	0	0	0	0	0	0	0	0	0	0	0	0	0	0	0	0	0	0	0	0	0
D_0__Bacteria;D_1__Firmicutes;D_2__Bacilli;D_3__Bacillales;D_4__Staphylococcaceae;D_5__Staphylococcus	9	0	0	0	0	0	0	0	0	0	0	0	0	0	0	0	0	0	0	0	0	0	0	0	0	0	0	9	0	0	0	0	0	0	0	0	0	0	0	0	0
D_0__Bacteria;D_1__Firmicutes;D_2__Clostridia;D_3__Clostridiales;D_4__Family XI;D_5__Parvimonas	9	0	0	0	0	0	0	0	0	0	0	0	0	0	0	3	0	0	0	0	0	6	0	0	0	0	0	0	0	0	0	0	0	0	0	0	0	0	0	0	0
D_0__Bacteria;D_1__Firmicutes;D_2__Clostridia;D_3__Clostridiales;D_4__Family XIII;__	8	0	0	0	0	0	0	0	0	0	0	0	0	0	0	0	0	0	0	0	0	0	0	0	5	0	0	0	3	0	0	0	0	0	0	0	0	0	0	0	0
D_0__Bacteria;D_1__Firmicutes;D_2__Negativicutes;D_3__Selenomonadales;D_4__Veillonellaceae;D_5__uncultured	8	0	0	0	8	0	0	0	0	0	0	0	0	0	0	0	0	0	0	0	0	0	0	0	0	0	0	0	0	0	0	0	0	0	0	0	0	0	0	0	0
D_0__Bacteria;D_1__Bacteroidetes;D_2__Bacteroidia;D_3__Flavobacteriales;D_4__Flavobacteriaceae;D_5__Flavobacterium	7	0	0	0	0	0	0	7	0	0	0	0	0	0	0	0	0	0	0	0	0	0	0	0	0	0	0	0	0	0	0	0	0	0	0	0	0	0	0	0	0
D_0__Bacteria;D_1__Bacteroidetes;D_2__Bacteroidia;D_3__Flavobacteriales;D_4__Flavobacteriaceae;D_5__NS2b marine group	7	0	0	7	0	0	0	0	0	0	0	0	0	0	0	0	0	0	0	0	0	0	0	0	0	0	0	0	0	0	0	0	0	0	0	0	0	0	0	0	0
D_0__Bacteria;D_1__Firmicutes;D_2__Clostridia;D_3__Clostridiales;D_4__Family XI;D_5__Finegoldia	7	0	0	0	0	0	0	0	0	0	0	0	0	4	0	0	0	0	0	0	0	0	0	0	3	0	0	0	0	0	0	0	0	0	0	0	0	0	0	0	0
D_0__Bacteria;D_1__Firmicutes;D_2__Clostridia;D_3__Clostridiales;D_4__Lachnospiraceae;D_5__Lachnospiraceae NC2004 group	7	0	0	0	0	0	0	0	0	0	0	0	0	0	0	0	0	0	3	0	0	0	0	0	4	0	0	0	0	0	0	0	0	0	0	0	0	0	0	0	0
Unassigned;__;__;__;__;__	7	0	0	0	0	0	0	0	0	0	0	0	0	0	0	0	0	0	0	0	0	0	7	0	0	0	0	0	0	0	0	0	0	0	0	0	0	0	0	0	0
D_0__Bacteria;D_1__Actinobacteria;D_2__Coriobacteriia;D_3__Coriobacteriales;__;__	5	0	0	0	0	0	0	0	0	0	0	0	0	0	0	0	0	0	0	0	2	0	0	0	3	0	0	0	0	0	0	0	0	0	0	0	0	0	0	0	0
D_0__Bacteria;D_1__Bacteroidetes;D_2__Bacteroidia;D_3__Bacteroidales;D_4__Marinilabiliaceae;__	5	0	0	0	0	0	0	0	0	0	0	0	0	0	0	0	0	0	0	0	0	0	0	0	0	0	0	5	0	0	0	0	0	0	0	0	0	0	0	0	0
D_0__Bacteria;D_1__Firmicutes;D_2__Erysipelotrichia;D_3__Erysipelotrichales;D_4__Erysipelotrichaceae;D_5__Erysipelotrichaceae UCG-007	5	0	0	3	0	0	0	0	0	0	0	0	0	0	0	0	0	0	0	0	0	0	0	0	2	0	0	0	0	0	0	0	0	0	0	0	0	0	0	0	0
D_0__Bacteria;D_1__Patescibacteria;D_2__Saccharimonadia;D_3__Saccharimonadales;D_4__Saccharimonadaceae;D_5__Candidatus Saccharimonas	5	0	0	5	0	0	0	0	0	0	0	0	0	0	0	0	0	0	0	0	0	0	0	0	0	0	0	0	0	0	0	0	0	0	0	0	0	0	0	0	0
D_0__Bacteria;D_1__Proteobacteria;D_2__Gammaproteobacteria;D_3__Betaproteobacteriales;D_4__Neisseriaceae;D_5__Neisseria	5	0	0	0	0	0	2	0	0	0	0	0	0	0	0	0	0	0	0	0	0	0	0	0	0	0	0	0	0	3	0	0	0	0	0	0	0	0	0	0	0
D_0__Bacteria;D_1__Actinobacteria;D_2__Actinobacteria;D_3__Micrococcales;D_4__Micrococcaceae;D_5__Rothia	4	0	0	0	0	0	0	4	0	0	0	0	0	0	0	0	0	0	0	0	0	0	0	0	0	0	0	0	0	0	0	0	0	0	0	0	0	0	0	0	0
D_0__Bacteria;D_1__Firmicutes;D_2__Clostridia;D_3__Clostridiales;D_4__Peptostreptococcaceae;__	4	0	4	0	0	0	0	0	0	0	0	0	0	0	0	0	0	0	0	0	0	0	0	0	0	0	0	0	0	0	0	0	0	0	0	0	0	0	0	0	0
D_0__Bacteria;D_1__Actinobacteria;D_2__Actinobacteria;D_3__Corynebacteriales;D_4__Corynebacteriaceae;D_5__Corynebacterium 1	3	0	0	0	0	0	0	0	0	0	3	0	0	0	0	0	0	0	0	0	0	0	0	0	0	0	0	0	0	0	0	0	0	0	0	0	0	0	0	0	0
D_0__Bacteria;D_1__Firmicutes;D_2__Clostridia;D_3__Clostridiales;D_4__Lachnospiraceae;D_5__Pseudobutyrivibrio	3	0	0	0	0	0	0	0	0	0	0	0	0	0	0	0	0	0	0	0	3	0	0	0	0	0	0	0	0	0	0	0	0	0	0	0	0	0	0	0	0
D_0__Bacteria;D_1__Fusobacteria;D_2__Fusobacteriia;D_3__Fusobacteriales;D_4__Leptotrichiaceae;D_5__Leptotrichia	3	0	0	0	0	0	0	0	0	0	0	0	0	0	3	0	0	0	0	0	0	0	0	0	0	0	0	0	0	0	0	0	0	0	0	0	0	0	0	0	0
D_0__Bacteria;D_1__Proteobacteria;D_2__Alphaproteobacteria;D_3__Caulobacterales;D_4__Caulobacteraceae;D_5__Brevundimonas	3	0	0	0	0	0	0	3	0	0	0	0	0	0	0	0	0	0	0	0	0	0	0	0	0	0	0	0	0	0	0	0	0	0	0	0	0	0	0	0	0
D_0__Bacteria;D_1__Bacteroidetes;D_2__Bacteroidia;D_3__Cytophagales;D_4__Spirosomaceae;D_5__Pseudarcicella	2	0	0	0	0	0	0	0	0	2	0	0	0	0	0	0	0	0	0	0	0	0	0	0	0	0	0	0	0	0	0	0	0	0	0	0	0	0	0	0	0
D_0__Bacteria;D_1__Firmicutes;D_2__Bacilli;D_3__Bacillales;D_4__Paenibacillaceae;D_5__uncultured bacterium	2	0	0	0	0	0	2	0	0	0	0	0	0	0	0	0	0	0	0	0	0	0	0	0	0	0	0	0	0	0	0	0	0	0	0	0	0	0	0	0	0
D_0__Bacteria;D_1__Firmicutes;D_2__Clostridia;D_3__Clostridiales;D_4__Family XI;D_5__Ezakiella	2	0	0	0	0	0	0	0	0	0	0	0	0	0	0	0	0	0	0	0	0	0	0	0	2	0	0	0	0	0	0	0	0	0	0	0	0	0	0	0	0
D_0__Bacteria;D_1__Proteobacteria;D_2__Alphaproteobacteria;D_3__Rhizobiales;D_4__Beijerinckiaceae;__	2	0	0	0	0	0	0	2	0	0	0	0	0	0	0	0	0	0	0	0	0	0	0	0	0	0	0	0	0	0	0	0	0	0	0	0	0	0	0	0	0
D_0__Bacteria;D_1__Proteobacteria;D_2__Gammaproteobacteria;D_3__Betaproteobacteriales;D_4__Burkholderiaceae;__	2	0	0	0	0	0	0	0	0	0	0	2	0	0	0	0	0	0	0	0	0	0	0	0	0	0	0	0	0	0	0	0	0	0	0	0	0	0	0	0	0
D_0__Bacteria;D_1__Proteobacteria;D_2__Gammaproteobacteria;D_3__Betaproteobacteriales;__;__	2	0	0	0	2	0	0	0	0	0	0	0	0	0	0	0	0	0	0	0	0	0	0	0	0	0	0	0	0	0	0	0	0	0	0	0	0	0	0	0	0
D_0__Bacteria;D_1__Proteobacteria;D_2__Gammaproteobacteria;D_3__Pseudomonadales;D_4__Moraxellaceae;D_5__Acinetobacter	2	0	0	0	0	0	0	0	2	0	0	0	0	0	0	0	0	0	0	0	0	0	0	0	0	0	0	0	0	0	0	0	0	0	0	0	0	0	0	0	0
D_0__Bacteria;D_1__Proteobacteria;D_2__Gammaproteobacteria;D_3__Pseudomonadales;D_4__Moraxellaceae;D_5__Psychrobacter	2	0	0	0	0	0	0	0	0	0	2	0	0	0	0	0	0	0	0	0	0	0	0	0	0	0	0	0	0	0	0	0	0	0	0	0	0	0	0	0	0

## Sheet: ASVs-bioconductor
Root	tot	A003	A014	A018	A036	A042	A056	A063	A070	A080	A081	A093	A131	A139	A140	A147	A157	A160	A167	A169	A174	A181	A190	A215	A224	A235	A239	A243	A244	A258	A260	A262	C023	C035	C059	C072	C089	C114	C145	C146	C209
Bacteria_p-Bacteroidetes_c-Bacteroidia_o-Bacteroidales_f-Bacteroidaceae_g-Bacteroides	723485	4900	5343	26158	42151	14015	2636	1575	32719	5233	43962	15288	14891	110	7022	11604	7796	15653	10124	32576	15466	33400	27979	10441	11059	4338	23790	28193	21105	35733	12947	60234	36695	1235	7918	8379	19684	15510	18106	15545	21972
Bacteria_p-Bacteroidetes_c-Bacteroidia_o-Bacteroidales_f-Rikenellaceae_g-Alistipes	190750	11238	777	19209	20794	6644	0	189	9638	966	4	7840	5378	14	1352	2787	2213	576	903	3845	10050	7618	6488	7544	4649	1497	13448	6444	3419	1	2347	6670	6953	3487	3277	3241	860	649	888	2650	4203
Bacteria_p-Firmicutes_c-Clostridia_o-Clostridiales_f-Ruminococcaceae_g-Faecalibacterium	166175	6397	2846	2734	4784	3327	2	393	5172	2631	12	2550	3754	1542	4090	3749	688	3969	5434	2833	6094	9873	10275	7239	4155	3014	207	10287	3426	10921	2332	14414	9134	552	2114	7731	2030	0	1877	3593	0
Bacteria_p-Firmicutes_c-Clostridia_o-Clostridiales_f-Lachnospiraceae_g-Agathobacter	58168	3053	1011	1	139	1634	0	474	587	333	2185	1320	2581	2169	296	888	1	5624	6070	125	1114	5484	480	567	561	98	4241	1712	3071	3	149	887	1476	313	1338	2349	268	1407	1943	2119	97
Bacteria_p-Verrucomicrobia_c-Verrucomicrobiae_o-Verrucomicrobiales_f-Akkermansiaceae_g-Akkermansia	59256	770	17	124	7227	9	17601	0	2206	6	2	831	258	161	38	655	0	193	2756	202	654	2	2	33	1689	75	6637	6	940	48	51	3	6551	9	2954	12	11	5764	4	10	745
Bacteria_p-Firmicutes_c-Negativicutes_o-Selenomonadales_f-Acidaminococcaceae_g-Phascolarctobacterium	54799	895	1746	2310	0	0	3317	117	2	541	1	9769	2561	1	0	3251	253	0	2378	6425	393	28	2194	306	1547	0	2	1	156	0	560	0	3873	908	1976	2718	677	0	1410	2665	1818
Bacteria_p-Firmicutes_c-Clostridia_o-Clostridiales_f-Ruminococcaceae_g-Subdoligranulum	77132	1973	761	5163	4	1324	0	3363	2209	40	1	3896	779	1032	967	2251	964	921	2336	646	4494	2721	3164	1474	3086	1310	3725	2737	1357	3063	431	2549	7321	0	3590	1573	785	781	1037	963	2341
Bacteria_p-Bacteroidetes_c-Bacteroidia_o-Bacteroidales_f-Barnesiellaceae_g-Barnesiella	71693	3708	67	5158	7846	652	174	174	2319	723	0	4259	1144	2	6	1829	2075	0	362	2	1947	5016	3633	4051	4	127	1818	3679	870	1634	1	3976	3491	1	5489	9	698	2279	1483	327	660
Bacteria_p-Firmicutes_c-Clostridia_o-Clostridiales_f-Ruminococcaceae_g-Ruminococcus_1	61958	214	1842	11415	2083	842	0	32	423	1	3447	859	409	1	386	2498	3450	973	3111	1598	2988	867	471	437	2310	122	679	2664	458	2	257	2	8555	291	1903	629	4	670	25	4906	134
Bacteria_p-Firmicutes_c-Clostridia_o-Clostridiales_f-Ruminococcaceae_g-Ruminococcus_2	68906	531	81	2884	5052	582	2	10949	676	250	1006	2971	278	373	0	1031	681	722	549	2049	2213	1283	429	3883	1919	499	13864	487	1932	5422	2034	1	1158	291	738	334	0	657	219	876	0
Bacteria_p-Bacteroidetes_c-Bacteroidia_o-Bacteroidales_f-Tannerellaceae_g-Parabacteroides	77991	1380	3669	4146	8741	1225	1281	157	3012	654	0	1627	1747	32	446	1233	977	1024	630	1473	2611	2015	5900	2035	573	344	4925	1384	1633	2601	1337	3463	7067	321	866	537	0	2028	485	2597	1815
Bacteria_p-Firmicutes_c-Erysipelotrichia_o-Erysipelotrichales_f-Erysipelotrichaceae_g-Erysipelotrichaceae_UCG-003	24128	145	11	826	145	22	0	7461	38	1	0	1473	512	4146	520	2	0	111	960	1087	11	62	487	205	372	63	1280	179	88	353	98	1442	505	79	225	274	876	0	0	69	0
Bacteria_p-Firmicutes_c-Clostridia_o-Clostridiales_f-Lachnospiraceae_g-Lachnospira	72530	1558	1804	606	1888	1623	0	101	2422	1359	5872	3281	2104	80	1977	1945	293	1700	1863	6530	1849	261	1119	1784	2633	91	256	828	704	2476	1	5911	5884	73	1699	2332	2591	831	836	1706	1659
Bacteria_p-Proteobacteria_c-Gammaproteobacteria_o-Enterobacteriales_f-Enterobacteriaceae_g-Escherichia/Shigella	24587	1	0	164	131	15	1780	91	24	755	151	1478	1236	29	8	21	2	10	18	1	6845	252	0	26	184	39	18	219	1691	4007	1569	3	18	9	2	1	7	17	23	3731	11
Bacteria_p-Firmicutes_c-Clostridia_o-Clostridiales_f-Lachnospiraceae_g-Fusicatenibacter	20062	361	99	341	2287	177	0	171	240	75	1083	374	286	672	88	584	51	545	1849	244	453	1433	1766	300	321	231	242	66	187	1	259	1012	846	0	331	960	700	0	149	291	987
Bacteria_p-Firmicutes_c-Clostridia_o-Clostridiales_f-Ruminococcaceae_g-Ruminococcaceae_UCG-002	78455	3385	1127	3537	1609	1296	0	1330	5701	1	0	3932	1340	2	1804	2301	158	71	961	694	6143	3791	168	3997	6347	1061	3595	1298	2595	22	2479	760	2637	5030	4582	3209	41	749	91	611	0
Bacteria_p-Firmicutes_c-Clostridia_o-Clostridiales_f-Lachnospiraceae_g-Blautia	56386	1912	476	2430	2754	211	48	4065	452	310	1102	1314	561	5009	598	384	649	751	1380	446	2270	1980	1689	1279	1208	259	3636	1122	845	4036	652	3150	1361	328	1610	1104	1008	1457	624	414	1502
Bacteria_p-Synergistetes_c-Synergistia_o-Synergistales_f-Synergistaceae_g-Pyramidobacter	28916	2	0	0	0	12	28202	0	2	1	175	3	0	0	0	2	0	1	0	0	17	364	0	0	0	0	0	0	63	1	0	0	0	0	0	0	0	3	0	15	53
Bacteria_p-Firmicutes_c-Clostridia_o-Clostridiales_f-Lachnospiraceae_g-Lachnospiraceae_NK4A136_group	67305	1451	2794	1003	7	463	3	184	3003	641	393	749	1053	15	2784	1739	14	37	1398	7375	668	644	3091	5191	920	712	662	6315	3780	3	766	7888	3522	868	2054	794	2000	248	1031	312	730
Bacteria_p-Proteobacteria_c-Gammaproteobacteria_o-Betaproteobacteriales_f-Burkholderiaceae_g-Parasutterella	32963	0	3	29	12148	621	3	1	0	0	0	2269	32	1	4	753	694	2025	502	0	84	0	753	7	14	0	2	716	676	1107	0	5430	0	44	528	1700	870	0	0	293	1654
Bacteria_p-Firmicutes_c-Clostridia_o-Clostridiales_f-Lachnospiraceae_g-Dorea	16767	824	213	256	62	246	0	2435	285	149	718	146	114	2176	522	183	0	1	419	260	1503	885	117	116	592	101	329	118	238	795	203	594	462	396	415	297	141	77	20	185	174
Bacteria_p-Firmicutes_c-Negativicutes_o-Selenomonadales_f-Veillonellaceae_g-Dialister	19810	1266	0	0	5436	129	88	0	281	0	207	0	0	0	487	0	4	0	0	0	2286	597	136	321	5	840	5800	158	288	62	6	1236	1	2	0	0	0	167	5	2	0
Bacteria_p-Actinobacteria_c-Coriobacteriia_o-Coriobacteriales_f-Coriobacteriaceae_g-Collinsella	15117	1066	215	137	0	137	0	1682	87	4	0	74	0	1787	254	72	11	526	676	0	1571	597	271	101	3233	65	1280	149	101	0	30	61	327	214	210	0	0	0	89	90	0
Bacteria_p-Firmicutes_c-Clostridia_o-Clostridiales_f-Christensenellaceae_g-Christensenellaceae_R-7_group	50632	1164	580	4768	210	1697	1	82	1996	42	0	843	2562	0	995	2268	35	8	4111	823	3195	1510	2	895	7716	623	279	4981	414	0	28	82	6590	321	1488	177	0	1	37	53	55
Bacteria_p-Firmicutes_c-Clostridia_o-Clostridiales_f-Lachnospiraceae_g-Roseburia	32636	623	434	424	291	155	0	259	820	60	2542	901	354	82	291	573	196	3103	1048	1947	271	247	609	279	478	322	677	1646	2982	1	1757	1417	1956	173	292	884	946	531	2395	609	61
Bacteria_p-Lentisphaerae_c-Lentisphaeria_o-Victivallales_f-Victivallaceae_g-Victivallis	12542	1132	2165	2	0	53	0	0	58	0	0	0	195	0	37	15	0	0	2	0	3953	0	0	151	30	0	46	452	14	0	0	0	732	9	6	3490	0	0	0	0	0
Bacteria_p-Firmicutes_c-Clostridia_o-Clostridiales_f-Lachnospiraceae_g-Lachnospiraceae_ND3007_group	13153	144	202	117	1783	145	0	16	156	203	0	556	134	476	158	1075	0	0	1305	474	203	114	203	291	455	149	295	234	203	0	97	625	572	44	1179	556	297	261	151	87	193
Bacteria_p-Firmicutes_c-Clostridia_o-Clostridiales_f-Ruminococcaceae_g-Ruminiclostridium_6	26659	5625	773	111	1114	273	11	10	2574	0	214	794	866	1	273	0	0	524	60	0	169	0	0	6264	112	262	0	0	278	0	756	17	3780	719	95	24	0	4	4	6	946
Bacteria_p-Firmicutes_c-Bacilli_o-Lactobacillales_f-Streptococcaceae_g-Streptococcus	18122	84	110	83	33	30	9819	151	78	20	618	18	42	65	2174	686	16	372	532	100	24	228	38	10	78	12	49	658	9	31	87	36	44	389	6	34	18	70	3	1160	107
Bacteria_p-Actinobacteria_c-Actinobacteria_o-Bifidobacteriales_f-Bifidobacteriaceae_g-Bifidobacterium	24558	71	122	1177	470	629	15	2046	39	0	2557	1587	16	1118	20	427	846	160	4140	0	1318	1889	121	12	943	0	1508	133	82	2	5	308	100	2430	158	0	0	1	0	60	48
Bacteria_p-Firmicutes_c-Negativicutes_o-Selenomonadales_f-Veillonellaceae_g-Veillonella	17804	19	3	11	9	361	28	48	78	45	14023	23	11	28	402	71	0	311	14	34	1	40	40	17	36	0	16	74	8	56	1	593	20	246	4	4	0	24	0	1050	55
Bacteria_p-Firmicutes_c-Clostridia_o-Clostridiales_f-Lachnospiraceae_g-Butyrivibrio	10389	0	5963	1	0	181	1	0	1586	0	0	0	0	0	0	0	0	0	0	0	0	0	0	0	254	2403	0	0	0	0	0	0	0	0	0	0	0	0	0	0	0
Bacteria_p-Firmicutes_c-Clostridia_o-Clostridiales_f-Ruminococcaceae_g-Oscillibacter	10514	212	126	111	1217	217	0	149	357	42	0	194	119	15	43	39	130	94	115	144	323	399	227	129	57	148	454	361	100	450	328	108	149	620	720	335	53	1532	421	212	64
Bacteria_p-Firmicutes_c-Clostridia_o-Clostridiales_f-Lachnospiraceae_g-Anaerostipes	19067	133	35	1174	789	30	0	1570	47	18	1009	1195	63	1052	58	253	480	499	1207	588	107	171	416	72	133	107	247	4484	42	245	89	564	481	64	97	636	124	385	164	64	175
Bacteria_p-Bacteroidetes_c-Bacteroidia_o-Bacteroidales_f-Marinifilaceae_g-Odoribacter	16163	816	171	1405	728	197	0	67	1096	0	0	1461	748	0	214	314	168	0	102	430	1300	778	736	311	360	183	295	1309	539	2	170	0	426	0	74	275	452	382	0	471	183
Bacteria_p-Bacteroidetes_c-Bacteroidia_o-Bacteroidales_f-Prevotellaceae_g-Prevotella_9	47421	12858	7568	2	2	1	0	587	0	0	0	0	2	2	7141	3	0	0	0	1	6879	0	1	1057	1768	127	0	0	0	0	0	0	0	0	2	9418	0	1	0	0	1
Bacteria_p-Bacteroidetes_c-Bacteroidia_o-Bacteroidales_f-Prevotellaceae_g-Paraprevotella	15804	1791	425	0	1	254	0	41	3906	0	0	1	0	0	711	1287	359	1	1870	2	752	0	2542	1266	342	253	0	0	0	0	0	0	0	0	0	0	0	0	0	0	0
Bacteria_p-Firmicutes_c-Clostridia_o-Clostridiales_f-Lachnospiraceae_g-Lachnospiraceae_UCG-001	13147	80	96	403	1	289	1	12	133	155	848	450	218	1	80	108	0	0	434	1389	386	47	566	72	154	35	2	1197	533	0	328	1872	949	0	707	1335	6	0	0	1	259
Bacteria_p-Proteobacteria_c-Deltaproteobacteria_o-Desulfovibrionales_f-Desulfovibrionaceae_g-Bilophila	9293	365	43	92	2645	29	138	6	410	40	0	0	60	9	134	322	127	137	25	358	254	66	547	146	1	3	266	139	239	244	317	0	296	53	581	356	292	127	210	131	85
Bacteria_p-Bacteroidetes_c-Bacteroidia_o-Bacteroidales_f-Prevotellaceae_g-Prevotellaceae_UCG-001	9472	2	1280	3	3	3	1	20	0	4	2	0	2	6	26	774	1	2	2	2	0	2	1	3	4	47	3	6	0	2	1	3	0	0	7266	1	0	0	0	0	0
Bacteria_p-Bacteroidetes_c-Bacteroidia_o-Bacteroidales_f-Muribaculaceae_g-CAG-873	7726	1	2	3381	1	0	0	0	0	0	0	0	0	0	0	0	0	0	0	0	0	0	0	0	4341	0	0	0	0	0	0	0	0	0	0	0	0	0	0	0	0
Bacteria_p-Firmicutes_c-Clostridia_o-Clostridiales_f-Ruminococcaceae_g-Ruminococcaceae_UCG-014	37583	2858	2185	4287	75	15	2	1053	2629	72	1	3598	339	2	499	1824	1	27	172	0	2477	45	1570	2512	4320	1033	1921	1118	760	1	240	0	781	47	1118	0	1	0	0	0	0
Bacteria_p-Firmicutes_c-Clostridia_o-Clostridiales_f-Ruminococcaceae_g-Ruminococcaceae_UCG-005	18315	1326	899	368	190	834	12	105	1294	5	1	351	370	14	346	812	7	20	53	304	1611	167	45	2134	1621	336	28	615	286	35	654	165	733	125	1668	510	4	12	12	197	46
Bacteria_p-Proteobacteria_c-Gammaproteobacteria_o-Betaproteobacteriales_f-Burkholderiaceae_g-Sutterella	35030	4984	1906	62	0	0	0	90	3035	529	0	0	1360	198	1191	12	0	1	176	88	892	2924	4496	2912	103	136	802	0	0	0	906	0	6762	80	41	0	0	1151	0	193	0
Bacteria_p-Firmicutes_c-Clostridia_o-Clostridiales_f-Lachnospiraceae_g-Lachnoclostridium	21227	251	107	103	1518	256	9	80	102	90	1332	542	158	1624	730	472	50	346	649	1918	168	198	260	377	157	49	2999	115	349	463	454	623	612	75	440	1337	378	695	177	296	668
Bacteria_p-Firmicutes_c-Clostridia_o-Clostridiales_f-Ruminococcaceae_g-Ruminococcaceae_UCG-013	6359	44	47	194	309	31	1	29	32	313	150	82	42	41	210	79	223	240	404	836	316	76	112	30	146	9	119	333	73	182	44	484	446	44	78	127	97	45	73	166	52
Bacteria_p-Bacteroidetes_c-Bacteroidia_o-Bacteroidales_f-Prevotellaceae_g-Prevotellaceae_NK3B31_group	14616	991	0	0	1	0	2	96	9100	2	1	0	0	1	0	0	0	0	0	0	3492	0	0	930	0	0	0	0	0	0	0	0	0	0	0	0	0	0	0	0	0
Bacteria_p-Firmicutes_c-Clostridia_o-Clostridiales_f-Ruminococcaceae_g-Ruminococcaceae_UCG-003	9514	202	351	34	0	3	0	0	614	78	0	503	186	10	711	92	2	358	138	0	60	275	1201	1013	49	49	0	533	397	0	68	299	647	277	762	143	94	213	89	0	63
Bacteria_p-Firmicutes_c-Clostridia_o-Clostridiales_f-Lachnospiraceae_g-Coprococcus_3	5337	498	107	6	0	155	1	673	190	49	0	129	82	92	52	104	0	0	336	11	191	491	74	131	194	45	270	58	58	0	147	143	153	29	232	193	17	237	0	189	0
Bacteria_p-Proteobacteria_c-Gammaproteobacteria_o-Enterobacteriales_f-Enterobacteriaceae_g-Klebsiella	13319	141	8	0	0	0	12639	1	1	2	185	1	0	0	1	0	0	15	0	0	0	0	0	273	0	0	0	0	0	0	0	0	52	0	0	0	0	0	0	0	0
Bacteria_p-Tenericutes_c-Mollicutes_o-Anaeroplasmatales_f-Anaeroplasmataceae_g-Anaeroplasma	6060	0	3045	0	303	0	0	0	2119	0	0	1	1	0	0	1	1	2	0	0	0	1	0	581	0	0	0	1	0	2	1	1	0	0	0	0	0	0	0	0	0
Bacteria_p-Firmicutes_c-Clostridia_o-Clostridiales_f-Lachnospiraceae_g-Lachnospiraceae_UCG-004	9107	70	79	39	222	48	0	2	96	124	549	100	215	1	491	265	19	185	175	2545	127	26	407	132	56	14	90	88	261	564	155	979	328	4	13	255	212	0	54	29	88
Bacteria_p-Firmicutes_c-Clostridia_o-Clostridiales_f-Lachnospiraceae_g-CAG-56	4698	262	82	0	0	84	0	95	10	56	0	98	70	527	170	48	0	21	146	94	112	284	102	102	176	24	1	43	314	0	161	0	528	7	109	870	0	1	0	101	0
Bacteria_p-Firmicutes_c-Clostridia_o-Clostridiales_f-Ruminococcaceae_g-CAG-352	4117	0	0	0	0	0	0	0	0	0	0	0	0	0	83	637	0	0	0	0	0	0	0	0	2742	1	1	580	0	0	0	0	73	0	0	0	0	0	0	0	0
Bacteria_p-Firmicutes_c-Clostridia_o-Clostridiales_f-Lachnospiraceae_g-Coprococcus_2	9994	1204	609	1695	347	3	0	0	341	0	2	591	536	0	110	188	0	215	0	0	322	0	0	232	625	32	778	0	1	0	0	0	1227	0	781	0	0	0	155	0	0
Bacteria_p-Firmicutes_c-Clostridia_o-Clostridiales_f-Ruminococcaceae_g-Ruminococcaceae_NK4A214_group	7566	219	222	357	1265	78	15	113	170	6	0	241	15	0	138	171	13	0	19	0	158	100	0	346	443	32	702	236	120	0	55	0	221	171	542	1303	0	0	13	26	56
Bacteria_p-Firmicutes_c-Clostridia_o-Clostridiales_f-Lachnospiraceae_g-Lachnospiraceae_UCG-010	5135	153	34	90	2	12	0	10	50	14	0	397	24	3	213	269	2	37	289	89	75	94	175	565	47	122	188	397	208	21	128	28	327	18	144	109	189	515	0	0	97
Bacteria_p-Firmicutes_c-Clostridia_o-Clostridiales_f-Peptostreptococcaceae_g-Intestinibacter	2996	174	116	2	69	34	0	17	20	3	120	2	31	0	0	5	11	12	16	72	73	143	0	1	431	7	147	5	10	0	3	1472	0	0	0	0	0	0	0	0	0
Bacteria_p-Bacteroidetes_c-Bacteroidia_o-Bacteroidales_f-Prevotellaceae_g-Alloprevotella	8537	2	6059	1	4	0	1	270	1	1	1	0	0	2	0	1	0	0	1	0	2	2	0	2177	4	0	3	1	0	1	2	1	0	0	0	0	0	0	0	0	0
Bacteria_p-Firmicutes_c-Clostridia_o-Clostridiales_f-Ruminococcaceae_g-Flavonifractor	4520	40	38	83	265	18	1	54	56	30	1581	11	28	61	24	30	20	156	38	83	109	294	107	29	41	40	99	27	22	116	14	321	23	198	58	41	34	105	178	30	17
Bacteria_p-Bacteroidetes_c-Bacteroidia_o-Bacteroidales_f-Rikenellaceae_g-Rikenellaceae_RC9_gut_group	11139	0	8042	1	0	1	0	127	2767	0	0	0	0	0	62	0	0	0	0	0	0	0	0	5	10	124	0	0	0	0	0	0	0	0	0	0	0	0	0	0	0
Bacteria_p-Firmicutes_c-Clostridia_o-Clostridiales_f-Ruminococcaceae_g-Ruminococcaceae_UCG-010	13373	745	1873	1010	31	41	0	12	1948	0	0	285	213	0	181	113	12	36	1	69	1473	98	0	902	428	98	0	3000	2	0	27	0	551	78	115	7	0	0	0	24	0
Bacteria_p-Firmicutes_c-Clostridia_o-Clostridiales_f-Ruminococcaceae_g-Intestinimonas	4970	214	26	219	384	38	0	59	83	44	0	80	89	1	124	210	16	59	105	52	135	100	64	124	176	54	591	89	119	33	44	318	131	456	272	33	26	103	209	46	44
Bacteria_p-Proteobacteria_c-Deltaproteobacteria_o-Desulfovibrionales_f-Desulfovibrionaceae_g-Desulfovibrio	8773	31	301	518	449	144	3	253	32	0	0	0	0	0	155	394	0	0	216	0	410	8	0	655	124	0	263	1	623	0	11	1	0	3642	0	512	0	0	0	27	0
Bacteria_p-Firmicutes_c-Clostridia_o-Clostridiales_f-Lachnospiraceae_g-Coprococcus_1	2395	100	42	287	0	42	0	205	42	0	0	126	39	141	25	32	0	0	144	0	85	120	27	55	186	4	78	18	32	108	41	43	167	0	61	107	0	29	0	9	0
Bacteria_p-Firmicutes_c-Clostridia_o-Clostridiales_f-Peptostreptococcaceae_g-Romboutsia	2518	100	395	14	43	6	8	114	128	179	3	2	74	2	21	60	0	66	17	1	54	61	0	4	520	0	23	126	47	1	1	55	297	57	4	1	31	1	1	1	0
Bacteria_p-Firmicutes_c-Clostridia_o-Clostridiales_f-Family_XIII_g-Family_XIII_AD3011_group	4284	83	188	83	8	28	769	589	132	4	0	62	29	5	17	30	65	19	17	29	37	57	43	89	294	22	1161	81	10	11	12	3	5	61	67	83	0	15	9	41	26
Archaea_p-Euryarchaeota_c-Methanobacteria_o-Methanobacteriales_f-Methanobacteriaceae_g-Methanobrevibacter	2075	10	9	111	0	23	1806	20	6	0	0	0	0	0	1	0	0	0	0	0	22	0	0	1	17	0	0	3	4	0	0	0	0	0	39	0	0	0	0	3	0
Bacteria_p-Firmicutes_c-Negativicutes_o-Selenomonadales_f-Acidaminococcaceae_g-Acidaminococcus	2395	0	1	0	0	482	0	89	0	0	0	0	0	142	2	1	831	474	0	0	188	0	0	0	0	0	0	0	0	0	0	0	0	0	0	0	0	0	185	0	0
Bacteria_p-Firmicutes_c-Clostridia_o-Clostridiales_f-Clostridiaceae_1_g-Clostridium_sensu_stricto_1	3816	335	757	33	4	14	81	68	48	134	10	1	118	0	3	20	0	22	1	5	87	93	25	6	454	5	16	313	47	0	26	708	0	217	13	1	51	0	2	98	0
Bacteria_p-Firmicutes_c-Clostridia_o-Clostridiales_f-Ruminococcaceae_g-Butyricicoccus	5634	77	25	233	261	92	0	153	23	35	54	238	76	626	216	74	50	105	645	275	260	72	39	27	34	47	70	104	120	105	79	648	57	20	157	116	65	72	186	73	25
Bacteria_p-Bacteroidetes_c-Bacteroidia_o-Bacteroidales_f-Marinifilaceae_g-Butyricimonas	15009	1051	181	413	1	332	0	33	560	164	0	882	313	1	359	622	161	0	33	0	607	2136	760	819	196	157	243	955	596	595	427	0	0	147	103	265	203	321	481	736	156
Bacteria_p-Firmicutes_c-Clostridia_o-Clostridiales_f-Ruminococcaceae_g-UBA1819	3241	25	5	46	97	38	3	22	4	0	21	5	9	61	9	31	66	12	52	22	53	145	6	34	69	13	2042	9	51	19	6	40	9	131	14	7	3	16	20	18	8
Bacteria_p-Bacteroidetes_c-Bacteroidia_o-Bacteroidales_f-Barnesiellaceae_g-Coprobacter	5294	53	66	10	0	19	0	6	116	10	0	286	164	0	6	36	67	1105	28	0	129	68	50	360	25	1	219	148	468	0	0	356	185	36	55	53	195	381	0	60	533
Bacteria_p-Firmicutes_c-Erysipelotrichia_o-Erysipelotrichales_f-Erysipelotrichaceae_g-Asteroleplasma	1590	0	25	0	0	0	0	0	0	0	0	0	0	0	0	17	0	0	0	0	0	0	0	0	0	0	0	1548	0	0	0	0	0	0	0	0	0	0	0	0	0
Bacteria_p-Firmicutes_c-Clostridia_o-Clostridiales_f-Lachnospiraceae_g-Tyzzerella_3	1571	0	0	0	141	0	0	11	0	0	0	0	0	427	0	19	0	0	192	0	0	0	112	0	0	0	54	0	46	288	124	0	91	0	66	0	0	0	0	0	0
Bacteria_p-Actinobacteria_c-Coriobacteriia_o-Coriobacteriales_f-Eggerthellaceae_g-Senegalimassilia	2564	0	4	0	0	0	0	0	23	0	0	0	0	1743	42	33	0	0	0	0	47	13	0	30	233	1	0	8	69	0	0	0	10	74	193	30	0	0	0	11	0
Bacteria_p-Firmicutes_c-Clostridia_o-Clostridiales_f-Ruminococcaceae_g-Ruminiclostridium_9	5668	196	88	119	660	113	0	46	112	46	49	44	25	14	70	114	17	86	38	430	280	175	51	250	94	47	163	230	221	90	16	726	67	25	78	116	364	221	126	6	55
Bacteria_p-Actinobacteria_c-Coriobacteriia_o-Coriobacteriales_f-Eggerthellaceae_g-Enterorhabdus	1467	118	14	0	0	0	0	813	22	1	0	118	24	0	37	0	0	0	0	0	29	0	0	24	232	35	0	0	0	0	0	0	0	0	0	0	0	0	0	0	0
Bacteria_p-Firmicutes_c-Clostridia_o-Clostridiales_f-Lachnospiraceae_g-Lachnospiraceae_UCG-003	2984	0	0	0	0	0	0	0	195	714	0	0	502	0	0	578	0	0	0	0	0	0	0	492	0	0	0	503	0	0	0	0	0	0	0	0	0	0	0	0	0
Bacteria_p-Firmicutes_c-Erysipelotrichia_o-Erysipelotrichales_f-Erysipelotrichaceae_g-Holdemanella	2638	762	245	0	0	0	0	1351	0	0	0	0	0	0	50	0	0	0	0	0	9	0	0	0	221	0	0	0	0	0	0	0	0	0	0	0	0	0	0	0	0
Bacteria_p-Proteobacteria_c-Gammaproteobacteria_o-Pasteurellales_f-Pasteurellaceae_g-Haemophilus	2090	76	1	0	0	0	0	0	321	11	499	25	37	1	81	150	0	68	11	0	4	174	2	4	5	0	1	18	5	56	7	25	448	4	1	1	1	0	1	45	7
Bacteria_p-Firmicutes_c-Clostridia_o-Clostridiales_f-Lachnospiraceae_g-Lachnospiraceae_AC2044_group	1277	5	51	0	0	19	0	59	8	0	0	0	0	0	61	0	0	0	0	0	19	0	0	677	52	4	0	18	0	0	233	0	1	20	10	39	1	0	0	0	0
Bacteria_p-Firmicutes_c-Clostridia_o-Clostridiales_f-Lachnospiraceae_g-Tyzzerella_4	1424	0	0	0	0	1	0	0	0	1	1	0	0	0	3	3	2	2	1	0	0	763	0	1	268	0	0	0	4	0	0	0	0	0	0	1	2	277	0	2	92
Bacteria_p-Firmicutes_c-Clostridia_o-Clostridiales_f-Ruminococcaceae_g-Oscillospira	1702	118	3	59	117	6	0	1	17	33	0	18	20	0	10	22	9	75	10	28	44	15	39	10	7	7	5	127	0	0	0	430	118	49	3	115	29	10	55	79	14
Bacteria_p-Firmicutes_c-Negativicutes_o-Selenomonadales_f-Veillonellaceae_g-Megamonas	1152	0	0	0	0	0	0	0	0	0	0	0	0	882	0	237	0	0	0	0	0	0	0	0	0	0	0	0	0	0	0	0	33	0	0	0	0	0	0	0	0
Bacteria_p-Firmicutes_c-Clostridia_o-Clostridiales_f-Ruminococcaceae_g-Fournierella	1199	19	530	1	0	7	0	0	5	0	0	0	0	0	0	0	0	75	0	0	0	0	0	228	0	0	0	141	9	0	0	0	0	0	184	0	0	0	0	0	0
Bacteria_p-Firmicutes_c-Clostridia_o-Clostridiales_f-Ruminococcaceae_g-Negativibacillus	1976	135	1	4	190	17	0	2	23	0	0	4	0	2	25	4	39	60	0	8	253	235	0	78	50	79	347	48	62	0	0	0	85	5	5	45	0	82	53	25	10
Bacteria_p-Firmicutes_c-Clostridia_o-Clostridiales_f-Lachnospiraceae_g-Tyzzerella	1454	9	0	1	0	0	0	2	0	1	0	0	2	13	1	2	0	92	2	909	4	2	202	3	0	1	99	4	3	83	0	0	0	0	0	0	0	19	0	0	0
Bacteria_p-Firmicutes_c-Clostridia_o-Clostridiales_f-Ruminococcaceae_g-Ruminiclostridium_5	2525	70	28	79	132	36	1	70	49	2	103	84	33	139	27	34	63	19	224	124	109	180	67	33	58	13	100	96	54	23	50	19	56	53	53	8	5	14	50	116	51
Bacteria_p-Firmicutes_c-Clostridia_o-Clostridiales_f-Lachnospiraceae_g-Lachnospiraceae_FCS020_group	1565	83	70	18	17	31	0	108	35	12	0	47	16	64	63	7	1	3	48	36	130	116	0	48	110	5	0	64	35	7	13	42	94	0	43	119	22	24	13	20	1
Bacteria_p-Firmicutes_c-Erysipelotrichia_o-Erysipelotrichales_f-Erysipelotrichaceae_g-Turicibacter	952	25	166	0	0	1	1	1	3	88	0	470	28	0	0	1	4	0	0	1	77	3	0	1	43	0	6	12	5	0	2	14	0	0	0	0	0	0	0	0	0
Bacteria_p-Firmicutes_c-Clostridia_o-Clostridiales_f-Ruminococcaceae_g-Ruminococcaceae_UCG-004	831	0	0	0	40	13	0	0	0	9	0	25	0	42	0	34	4	22	37	34	0	74	20	0	0	22	152	20	0	23	11	52	0	43	78	21	8	28	4	0	15
Bacteria_p-Actinobacteria_c-Coriobacteriia_o-Coriobacteriales_f-Eggerthellaceae_g-Eggerthella	1023	2	0	39	106	19	0	3	1	4	60	34	2	4	0	18	23	29	9	59	7	14	2	0	1	0	100	0	13	73	3	158	22	90	1	23	22	56	4	4	18
Bacteria_p-Firmicutes_c-Clostridia_o-Clostridiales_f-Lachnospiraceae_g-GCA-900066575	828	9	29	7	60	10	0	5	26	2	0	23	6	1	279	14	3	10	19	0	28	35	0	36	16	1	3	12	36	0	11	14	34	1	35	14	25	0	7	17	0
Bacteria_p-Firmicutes_c-Clostridia_o-Clostridiales_f-Peptostreptococcaceae_g-Terrisporobacter	595	22	74	0	0	3	0	28	60	16	0	0	30	0	1	0	0	5	13	0	3	21	0	2	74	0	0	4	6	0	0	176	55	1	0	1	0	0	0	0	0
Bacteria_p-Firmicutes_c-Clostridia_o-Clostridiales_f-Ruminococcaceae_g-Anaerotruncus	1077	10	10	6	267	30	0	1	13	0	14	21	2	0	7	27	24	3	2	58	18	22	6	5	12	47	263	5	19	6	48	8	33	21	17	14	0	11	19	5	3
Bacteria_p-Firmicutes_c-Clostridia_o-Clostridiales_f-Ruminococcaceae_g-DTU089	1267	31	26	10	124	9	0	12	24	2	0	22	2	0	5	17	48	12	0	5	76	78	23	2	21	13	285	16	2	0	22	9	13	164	74	11	1	3	85	17	3
Bacteria_p-Firmicutes_c-Bacilli_o-Lactobacillales_f-Lactobacillaceae_g-Lactobacillus	1313	1	6	24	15	591	51	6	17	0	4	8	9	2	6	17	10	28	6	0	65	4	2	46	5	4	24	332	8	3	7	12	0	0	0	0	0	0	0	0	0
Bacteria_p-Proteobacteria_c-Gammaproteobacteria_o-Enterobacteriales_f-Enterobacteriaceae_g-Citrobacter	1081	0	0	0	0	0	25	0	21	0	0	0	3	0	192	0	0	0	0	0	0	0	0	0	0	1	10	93	0	0	679	0	57	0	0	0	0	0	0	0	0
Bacteria_p-Firmicutes_c-Negativicutes_o-Selenomonadales_f-Veillonellaceae_g-Anaeroglobus	440	0	0	0	0	0	439	0	0	0	0	0	0	0	0	0	0	0	0	0	0	0	0	0	1	0	0	0	0	0	0	0	0	0	0	0	0	0	0	0	0
Bacteria_p-Actinobacteria_c-Coriobacteriia_o-Coriobacteriales_f-Eggerthellaceae_g-Slackia	445	0	0	0	0	0	0	26	0	0	0	0	0	0	44	5	0	0	0	0	0	0	0	93	277	0	0	0	0	0	0	0	0	0	0	0	0	0	0	0	0
Bacteria_p-Firmicutes_c-Erysipelotrichia_o-Erysipelotrichales_f-Erysipelotrichaceae_g-Erysipelatoclostridium	1483	0	0	121	58	2	4	43	0	24	50	236	23	5	0	76	47	64	37	18	1	300	12	1	0	4	7	44	38	32	9	76	23	19	0	0	1	66	2	2	38
Bacteria_p-Proteobacteria_c-Gammaproteobacteria_o-Enterobacteriales_f-Enterobacteriaceae_g-Hafnia-Obesumbacterium	709	0	0	0	178	0	0	0	0	0	2	0	0	0	0	4	0	0	0	0	0	0	0	0	0	0	0	9	0	0	2	0	514	0	0	0	0	0	0	0	0
Bacteria_p-Proteobacteria_c-Gammaproteobacteria_o-Betaproteobacteriales_f-Burkholderiaceae_g-Oxalobacter	490	2	9	37	274	14	0	0	0	0	0	0	0	0	12	14	0	0	0	0	0	51	0	52	25	0	0	0	0	0	0	0	0	0	0	0	0	0	0	0	0
Bacteria_p-Firmicutes_c-Erysipelotrichia_o-Erysipelotrichales_f-Erysipelotrichaceae_g-Catenibacterium	430	0	0	0	0	0	0	0	165	0	0	0	0	0	0	0	0	0	0	0	243	0	0	0	22	0	0	0	0	0	0	0	0	0	0	0	0	0	0	0	0
Bacteria_p-Firmicutes_c-Erysipelotrichia_o-Erysipelotrichales_f-Erysipelotrichaceae_g-Merdibacter	550	72	6	8	0	0	0	1	0	0	0	2	1	3	16	0	1	0	0	0	122	53	3	0	106	0	3	116	28	0	4	5	0	0	0	0	0	0	0	0	0
Bacteria_p-Firmicutes_c-Clostridia_o-Clostridiales_f-Lachnospiraceae_g-Marvinbryantia	1111	51	20	75	5	34	0	41	14	4	0	21	0	72	24	0	0	0	11	0	73	12	7	82	181	12	11	18	56	0	41	44	31	9	55	94	2	8	0	3	0
Bacteria_p-Firmicutes_c-Clostridia_o-Clostridiales_f-Family_XIII_g-Family_XIII_UCG-001	547	8	16	38	18	9	0	87	4	1	0	23	3	0	8	21	10	10	31	15	18	14	15	17	23	7	21	13	5	3	0	0	35	5	51	0	3	0	9	3	3
Bacteria_p-Firmicutes_c-Clostridia_o-Clostridiales_f-Ruminococcaceae_g-Ruminiclostridium	404	96	2	19	9	5	0	0	0	0	0	4	0	1	0	3	0	0	0	0	30	0	0	0	4	3	1	7	4	1	2	1	23	146	37	0	0	0	0	6	0
Bacteria_p-Firmicutes_c-Clostridia_o-Clostridiales_f-Ruminococcaceae_g-GCA-900066225	1105	56	3	39	38	201	0	40	101	18	0	11	20	1	17	10	2	15	4	22	13	138	3	49	89	5	50	5	19	2	5	0	84	0	41	1	0	2	0	0	1
Bacteria_p-Firmicutes_c-Erysipelotrichia_o-Erysipelotrichales_f-Erysipelotrichaceae_g-Holdemania	442	6	0	14	35	6	0	12	2	7	0	21	3	3	2	8	1	7	10	18	17	14	12	13	25	2	58	8	16	55	4	0	1	0	0	4	39	0	0	19	0
Bacteria_p-Firmicutes_c-Clostridia_o-Clostridiales_f-Lachnospiraceae_g-Eisenbergiella	685	1	0	8	39	2	0	12	1	0	0	20	2	0	1	3	20	24	0	24	100	159	2	77	6	1	8	45	2	74	5	5	1	0	2	5	0	0	36	0	0
Bacteria_p-Synergistetes_c-Synergistia_o-Synergistales_f-Synergistaceae_g-Cloacibacillus	320	5	0	0	206	0	0	6	0	2	0	0	0	0	1	2	0	0	1	0	0	0	0	30	67	0	0	0	0	0	0	0	0	0	0	0	0	0	0	0	0
Bacteria_p-Firmicutes_c-Clostridia_o-Clostridiales_f-Lachnospiraceae_g-Lachnospiraceae_UCG-008	286	21	18	13	0	2	0	8	8	0	0	0	0	0	0	0	0	0	0	1	36	0	0	14	20	0	0	33	0	0	7	0	31	0	30	40	0	0	0	4	0
Bacteria_p-Firmicutes_c-Clostridia_o-Clostridiales_f-Lachnospiraceae_g-Anaerosporobacter	1429	0	0	0	0	0	0	0	1428	0	0	0	0	0	0	0	0	0	0	0	0	0	0	0	0	0	0	0	0	0	0	1	0	0	0	0	0	0	0	0	0
Bacteria_p-Bacteroidetes_c-Bacteroidia_o-Bacteroidales_f-Marinifilaceae_g-Sanguibacteroides	343	0	13	197	0	0	0	0	0	4	0	0	0	0	0	0	0	0	0	0	0	0	0	26	0	0	48	55	0	0	0	0	0	0	0	0	0	0	0	0	0
Bacteria_p-Firmicutes_c-Clostridia_o-Clostridiales_f-Lachnospiraceae_g-Lachnospiraceae_NK3A20_group	227	0	227	0	0	0	0	0	0	0	0	0	0	0	0	0	0	0	0	0	0	0	0	0	0	0	0	0	0	0	0	0	0	0	0	0	0	0	0	0	0
Bacteria_p-Firmicutes_c-Clostridia_o-Clostridiales_f-Lachnospiraceae_g-Hungatella	352	1	0	3	20	7	0	3	0	1	13	2	1	3	1	8	7	3	0	13	2	15	0	2	134	20	6	1	2	80	0	4	0	0	0	0	0	0	0	0	0
Bacteria_p-Proteobacteria_c-Gammaproteobacteria_o-Enterobacteriales_f-Enterobacteriaceae_g-Raoultella	447	0	0	0	0	0	0	0	0	0	0	0	0	0	337	0	0	0	0	0	0	0	0	0	29	0	1	8	0	0	72	0	0	0	0	0	0	0	0	0	0
Bacteria_p-Firmicutes_c-Clostridia_o-Clostridiales_f-Lachnospiraceae_g-UC5-1-2E3	215	0	0	65	33	2	0	14	0	0	0	8	0	0	1	16	2	21	4	1	1	1	0	0	0	2	40	2	0	0	2	0	0	0	0	0	0	0	0	0	0
Bacteria_p-Firmicutes_c-Bacilli_o-Lactobacillales_f-Enterococcaceae_g-Enterococcus	313	1	0	0	23	0	119	0	0	0	5	0	12	0	4	2	59	1	0	0	0	12	12	0	0	1	3	15	43	1	0	0	0	0	0	0	0	0	0	0	0
Bacteria_p-Firmicutes_c-Clostridia_o-Clostridiales_f-Lachnospiraceae_g-Sellimonas	319	0	0	62	90	0	0	0	0	0	0	0	0	0	0	9	35	70	0	0	0	42	0	0	0	0	10	0	0	0	0	1	0	0	0	0	0	0	0	0	0
Bacteria_p-Proteobacteria_c-Gammaproteobacteria_o-Enterobacteriales_f-Enterobacteriaceae_g-Enterobacter	664	2	191	0	0	1	7	0	0	0	22	0	0	0	5	0	0	2	0	0	0	0	0	280	0	0	1	2	0	0	5	1	145	0	0	0	0	0	0	0	0
Bacteria_p-Actinobacteria_c-Coriobacteriia_o-Coriobacteriales_f-Eggerthellaceae_g-Gordonibacter	229	0	1	5	18	2	0	0	0	4	0	5	0	1	0	18	7	11	19	10	0	11	4	3	5	0	0	0	4	10	2	0	2	69	3	6	1	2	1	0	5
Bacteria_p-Firmicutes_c-Clostridia_o-Clostridiales_f-Ruminococcaceae_g-Hydrogenoanaerobacterium	205	17	2	49	21	9	0	0	8	0	0	3	0	0	8	2	1	0	0	0	43	6	0	1	14	2	13	6	0	0	0	0	0	0	0	0	0	0	0	0	0
Bacteria_p-Proteobacteria_c-Gammaproteobacteria_o-Enterobacteriales_f-Enterobacteriaceae_g-Proteus	210	0	0	0	0	0	5	0	0	0	203	0	0	0	0	0	0	0	0	0	0	2	0	0	0	0	0	0	0	0	0	0	0	0	0	0	0	0	0	0	0
Bacteria_p-Proteobacteria_c-Gammaproteobacteria_o-Enterobacteriales_f-Enterobacteriaceae_g-Cronobacter	172	0	0	0	0	0	0	0	0	0	0	0	0	0	0	0	0	0	0	0	0	0	0	0	171	0	1	0	0	0	0	0	0	0	0	0	0	0	0	0	0
Bacteria_p-Firmicutes_c-Clostridia_o-Clostridiales_f-Ruminococcaceae_g-Ruminococcaceae_UCG-011	272	2	0	24	0	18	5	0	0	0	0	0	0	0	0	41	0	0	0	0	6	0	0	1	31	3	21	1	0	0	0	0	15	40	62	0	0	0	0	2	0
Bacteria_p-Actinobacteria_c-Coriobacteriia_o-Coriobacteriales_f-Eggerthellaceae_g-Adlercreutzia	473	52	0	90	1	6	0	20	0	6	0	44	8	0	5	5	20	0	53	39	20	0	49	7	5	7	0	36	0	0	0	0	0	0	0	0	0	0	0	0	0
Bacteria_p-Actinobacteria_c-Coriobacteriia_o-Coriobacteriales_f-Coriobacteriaceae_g-Enorma	337	0	0	0	42	0	0	22	0	0	0	35	0	0	1	34	120	0	0	1	37	36	0	0	0	0	0	9	0	0	0	0	0	0	0	0	0	0	0	0	0
Bacteria_p-Firmicutes_c-Negativicutes_o-Selenomonadales_f-Veillonellaceae_g-Megasphaera	746	0	0	0	0	139	136	60	4	0	124	0	0	1	4	0	0	5	2	0	0	1	0	3	0	0	0	0	0	0	0	0	0	0	0	0	0	0	267	0	0
Bacteria_p-Firmicutes_c-Clostridia_o-Clostridiales_f-Lachnospiraceae_g-Shuttleworthia	199	2	0	0	0	4	0	0	1	0	0	35	0	0	0	0	2	0	113	0	4	0	0	0	2	0	0	36	0	0	0	0	0	0	0	0	0	0	0	0	0
Bacteria_p-Fusobacteria_c-Fusobacteriia_o-Fusobacteriales_f-Fusobacteriaceae_g-Fusobacterium	205	0	0	0	5	0	43	0	2	0	82	0	0	8	0	1	0	1	0	0	0	9	0	0	23	0	0	0	0	0	0	1	0	0	0	0	0	0	0	0	30
Bacteria_p-Actinobacteria_c-Coriobacteriia_o-Coriobacteriales_f-Eggerthellaceae_g-DNF00809	253	4	1	17	0	3	0	40	0	0	0	4	0	0	1	3	11	0	1	1	4	4	4	4	145	0	1	4	1	0	0	0	0	0	0	0	0	0	0	0	0
Bacteria_p-Firmicutes_c-Clostridia_o-Clostridiales_f-Ruminococcaceae_g-Caproiciproducens	426	15	19	5	48	45	0	13	11	0	0	8	6	0	4	20	25	6	9	46	1	0	27	2	34	8	41	12	3	0	3	0	4	4	1	3	0	2	0	1	0
Bacteria_p-Firmicutes_c-Clostridia_o-Clostridiales_f-Ruminococcaceae_g-Ruminiclostridium_1	217	96	0	0	34	0	0	0	0	0	0	0	0	0	0	44	0	0	0	0	0	0	0	13	22	0	0	0	0	0	0	0	0	1	0	7	0	0	0	0	0
Bacteria_p-Actinobacteria_c-Coriobacteriia_o-Coriobacteriales_f-Atopobiaceae_g-Olsenella	410	0	5	0	1	0	0	37	0	0	1	0	0	0	47	1	106	0	0	0	129	0	0	11	41	7	0	6	16	0	0	2	0	0	0	0	0	0	0	0	0
Bacteria_p-Firmicutes_c-Clostridia_o-Clostridiales_f-Caldicoprobacteraceae_g-Caldicoprobacter	161	3	4	23	1	0	0	0	0	0	0	0	0	0	0	19	0	0	0	0	0	0	0	111	0	0	0	0	0	0	0	0	0	0	0	0	0	0	0	0	0
Bacteria_p-Firmicutes_c-Clostridia_o-Clostridiales_f-Ruminococcaceae_g-Papillibacter	123	2	1	77	4	0	0	0	0	0	0	1	0	0	0	0	0	0	0	0	0	0	0	29	2	0	0	7	0	0	0	0	0	0	0	0	0	0	0	0	0
Bacteria_p-Firmicutes_c-Erysipelotrichia_o-Erysipelotrichales_f-Erysipelotrichaceae_g-Dielma	169	2	0	34	5	0	0	2	0	8	0	7	1	0	1	6	0	0	0	4	0	8	4	3	0	1	63	0	0	9	0	11	0	0	0	0	0	0	0	0	0
Bacteria_p-Firmicutes_c-Erysipelotrichia_o-Erysipelotrichales_f-Erysipelotrichaceae_g-Erysipelotrichaceae_UCG-004	300	0	0	25	35	0	0	0	117	0	0	0	0	0	0	0	0	0	0	0	0	0	0	0	0	11	0	112	0	0	0	0	0	0	0	0	0	0	0	0	0
Bacteria_p-Firmicutes_c-Clostridia_o-Clostridiales_f-Ruminococcaceae_g-Ruminococcaceae_UCG-009	296	21	13	1	2	1	0	1	2	0	0	3	1	0	0	1	2	0	0	0	28	7	0	135	27	0	2	41	5	0	3	0	0	0	0	0	0	0	0	0	0
Bacteria_p-Firmicutes_c-Clostridia_o-Clostridiales_f-Lachnospiraceae_g-Howardella	137	0	24	0	0	0	0	0	0	0	1	0	0	0	0	0	0	0	0	0	0	0	0	0	99	0	0	13	0	0	0	0	0	0	0	0	0	0	0	0	0
Bacteria_p-Bacteroidetes_c-Bacteroidia_o-Bacteroidales_f-Prevotellaceae_g-Prevotellaceae_UCG-003	104	0	0	0	0	0	0	0	0	0	0	0	0	0	0	0	0	0	0	0	0	0	0	0	0	104	0	0	0	0	0	0	0	0	0	0	0	0	0	0	0
Bacteria_p-Epsilonbacteraeota_c-Campylobacteria_o-Campylobacterales_f-Campylobacteraceae_g-Campylobacter	134	0	0	0	0	0	0	0	1	0	112	0	1	0	0	0	0	1	0	1	0	0	0	1	1	0	0	0	5	3	0	4	4	0	0	0	0	0	0	0	0
Bacteria_p-Firmicutes_c-Clostridia_o-Clostridiales_f-Defluviitaleaceae_g-Defluviitaleaceae_UCG-011	315	22	6	17	2	4	0	2	13	3	0	15	1	0	3	19	0	0	0	18	54	4	0	7	9	5	33	39	12	0	0	0	12	15	0	0	0	0	0	0	0
Bacteria_p-Firmicutes_c-Erysipelotrichia_o-Erysipelotrichales_f-Erysipelotrichaceae_g-Solobacterium	113	0	100	3	1	0	0	2	2	0	0	1	0	0	0	0	0	1	0	0	1	0	0	0	2	0	0	0	0	0	0	0	0	0	0	0	0	0	0	0	0
Bacteria_p-Firmicutes_c-Negativicutes_o-Selenomonadales_f-Veillonellaceae_g-Allisonella	98	0	13	0	0	0	0	24	4	0	0	0	0	0	0	0	0	0	0	0	56	0	0	1	0	0	0	0	0	0	0	0	0	0	0	0	0	0	0	0	0
Bacteria_p-Firmicutes_c-Clostridia_o-Clostridiales_f-Ruminococcaceae_g-Candidatus_Soleaferrea	404	21	53	24	15	10	0	14	17	3	0	33	6	1	6	25	6	5	7	6	19	31	5	14	18	8	44	2	5	1	2	3	0	0	0	0	0	0	0	0	0
Bacteria_p-Firmicutes_c-Clostridia_o-Clostridiales_f-Ruminococcaceae_g-Ruminococcaceae_UCG-008	104	0	2	1	0	0	0	76	0	0	0	0	0	0	0	0	0	0	0	3	0	0	0	3	3	0	0	11	2	0	0	3	0	0	0	0	0	0	0	0	0
Bacteria_p-Firmicutes_c-Clostridia_o-Clostridiales_f-Lachnospiraceae_g-FD2005	79	0	4	0	0	0	0	0	2	9	0	0	0	0	45	0	0	0	0	0	0	0	0	0	0	0	0	0	0	0	19	0	0	0	0	0	0	0	0	0	0
Bacteria_p-Firmicutes_c-Erysipelotrichia_o-Erysipelotrichales_f-Erysipelotrichaceae_g-Coprobacillus	79	0	0	0	0	0	0	0	0	0	0	0	0	18	0	6	1	0	0	0	0	11	2	9	19	3	0	0	2	0	7	1	0	0	0	0	0	0	0	0	0
Bacteria_p-Firmicutes_c-Clostridia_o-Clostridiales_f-Ruminococcaceae_g-Pseudoflavonifractor	116	0	0	1	0	0	0	0	0	0	0	4	0	0	0	0	4	10	1	0	6	13	0	0	0	0	0	2	8	0	0	0	20	40	0	0	0	0	7	0	0
Bacteria_p-Firmicutes_c-Clostridia_o-Clostridiales_f-Ruminococcaceae_g-Anaerofilum	150	9	2	9	1	3	0	10	4	0	0	15	9	0	5	3	0	0	3	0	19	0	7	0	24	3	0	6	17	0	1	0	0	0	0	0	0	0	0	0	0
Bacteria_p-Firmicutes_c-Clostridia_o-Clostridiales_f-Ruminococcaceae_g-Phocea	83	1	0	0	5	6	0	1	1	2	0	1	1	0	11	6	0	2	5	8	0	7	0	1	2	0	13	0	5	0	5	0	0	0	0	0	0	0	0	0	0
Bacteria_p-Firmicutes_c-Erysipelotrichia_o-Erysipelotrichales_f-Erysipelotrichaceae_g-Faecalitalea	189	0	0	0	36	0	0	0	0	4	0	0	63	0	0	8	0	13	0	34	0	14	0	0	2	0	13	0	2	0	0	0	0	0	0	0	0	0	0	0	0
Bacteria_p-Firmicutes_c-Clostridia_o-Clostridiales_f-Peptococcaceae_g-Peptococcus	147	19	1	20	43	0	0	0	0	0	0	29	0	0	0	0	0	2	0	0	0	0	0	0	0	3	0	0	0	0	0	0	1	2	0	27	0	0	0	0	0
Bacteria_p-Firmicutes_c-Bacilli_o-Lactobacillales_f-Carnobacteriaceae_g-Granulicatella	68	0	0	2	1	0	2	3	1	0	8	0	0	2	8	8	0	14	3	0	1	6	0	0	2	0	1	2	0	0	0	4	0	0	0	0	0	0	0	0	0
Bacteria_p-Proteobacteria_c-Gammaproteobacteria_o-Enterobacteriales_f-Enterobacteriaceae_g-Lelliottia	65	0	0	0	0	0	4	0	0	0	0	0	1	0	58	0	0	0	0	0	0	0	0	0	0	0	0	2	0	0	0	0	0	0	0	0	0	0	0	0	0
Bacteria_p-Firmicutes_c-Clostridia_o-Clostridiales_f-Lachnospiraceae_g-Epulopiscium	62	0	11	0	0	0	0	0	0	0	0	0	0	0	0	0	0	0	0	0	20	0	0	0	26	0	0	0	5	0	0	0	0	0	0	0	0	0	0	0	0
Bacteria_p-Firmicutes_c-Clostridia_o-Clostridiales_f-Ruminococcaceae_g-Acetanaerobacterium	84	6	0	3	4	12	0	0	4	0	0	7	1	2	0	0	1	3	0	12	2	1	0	1	0	2	17	1	0	4	1	0	0	0	0	0	0	0	0	0	0
Bacteria_p-Firmicutes_c-Bacilli_o-Lactobacillales_f-Streptococcaceae_g-Lactococcus	75	0	0	0	0	0	21	12	0	0	1	0	7	0	0	2	0	0	0	0	9	3	4	4	0	0	0	12	0	0	0	0	0	0	0	0	0	0	0	0	0
Bacteria_p-Firmicutes_c-Clostridia_o-Clostridiales_f-Ruminococcaceae_g-Pygmaiobacter	213	10	2	40	37	18	0	4	0	3	0	2	3	6	0	5	0	7	1	0	9	6	0	3	12	2	7	0	4	0	0	0	0	29	0	0	0	0	0	3	0
Bacteria_p-Firmicutes_c-Clostridia_o-Clostridiales_f-Lachnospiraceae_g-GCA-900066755	84	5	0	2	5	0	0	13	6	0	0	3	4	0	1	2	0	5	1	6	0	8	8	5	2	1	5	0	2	0	0	0	0	0	0	0	0	0	0	0	0
Bacteria_p-Bacteroidetes_c-Bacteroidia_o-Bacteroidales_f-Prevotellaceae_g-Prevotella_7	89	0	0	0	0	0	61	19	0	0	0	0	0	0	0	0	0	0	0	0	0	0	0	0	9	0	0	0	0	0	0	0	0	0	0	0	0	0	0	0	0
Bacteria_p-Actinobacteria_c-Actinobacteria_o-Micrococcales_f-Micrococcaceae_g-Rothia	79	0	0	2	3	0	8	4	1	0	1	0	1	0	19	14	0	4	0	0	4	4	1	0	0	0	0	13	0	0	0	0	0	0	0	0	0	0	0	0	0
Bacteria_p-Bacteroidetes_c-Bacteroidia_o-Bacteroidales_f-Prevotellaceae_g-Prevotella	77	0	0	0	0	0	0	0	0	0	31	1	0	2	1	0	0	0	0	0	0	0	0	5	37	0	0	0	0	0	0	0	0	0	0	0	0	0	0	0	0
Bacteria_p-Firmicutes_c-Clostridia_o-Clostridiales_f-Ruminococcaceae_g-Angelakisella	136	22	6	9	1	4	0	1	20	0	0	3	5	0	0	15	0	1	0	1	20	0	0	2	8	11	0	1	3	0	3	0	0	0	0	0	0	0	0	0	0
Bacteria_p-Firmicutes_c-Clostridia_o-Clostridiales_f-Lachnospiraceae_g-Lactonifactor	73	1	2	0	0	0	0	0	0	1	4	0	0	0	4	0	0	13	9	1	1	6	0	0	1	0	2	0	3	1	0	6	8	0	2	2	3	0	0	3	0
Bacteria_p-Firmicutes_c-Clostridia_o-Clostridiales_f-Ruminococcaceae_g-Ruminococcaceae_V9D2013_group	52	9	0	4	0	0	0	0	0	0	0	0	0	0	0	1	0	0	0	0	18	15	0	0	2	0	0	3	0	0	0	0	0	0	0	0	0	0	0	0	0
Bacteria_p-Actinobacteria_c-Actinobacteria_o-Actinomycetales_f-Actinomycetaceae_g-Actinomyces	104	2	2	3	3	0	0	34	0	1	4	11	0	5	3	4	0	8	0	0	2	11	0	3	5	0	1	0	1	0	0	1	0	0	0	0	0	0	0	0	0
Bacteria_p-Proteobacteria_c-Gammaproteobacteria_o-Pseudomonadales_f-Pseudomonadaceae_g-Pseudomonas	38	0	0	0	0	0	0	0	2	0	0	0	0	0	0	9	0	0	2	0	0	17	0	8	0	0	0	0	0	0	0	0	0	0	0	0	0	0	0	0	0
Bacteria_p-Actinobacteria_c-Coriobacteriia_o-Coriobacteriales_f-Eggerthellaceae_g-CHKCI002	46	0	0	0	0	0	0	0	0	0	0	0	0	0	0	0	0	0	0	0	0	15	0	0	0	0	0	0	0	1	0	30	0	0	0	0	0	0	0	0	0
Bacteria_p-Firmicutes_c-Clostridia_o-Clostridiales_f-Lachnospiraceae_g-Lachnospiraceae_UCG-006	31	0	4	0	0	0	0	0	0	0	0	0	0	0	0	0	0	0	0	0	0	0	0	3	0	0	0	0	0	0	0	24	0	0	0	0	0	0	0	0	0
Bacteria_p-Firmicutes_c-Clostridia_o-Clostridiales_f-Ruminococcaceae_g-Ruminococcaceae_UCG-007	70	13	3	5	0	0	0	0	0	0	0	0	1	0	0	5	0	0	0	0	10	0	0	11	5	3	0	13	0	0	1	0	0	0	0	0	0	0	0	0	0
Bacteria_p-Proteobacteria_c-Gammaproteobacteria_o-Aeromonadales_f-Succinivibrionaceae_g-Succinatimonas	28	0	0	0	0	0	0	0	0	0	0	0	0	0	0	28	0	0	0	0	0	0	0	0	0	0	0	0	0	0	0	0	0	0	0	0	0	0	0	0	0
Bacteria_p-Bacteroidetes_c-Bacteroidia_o-Bacteroidales_f-Rikenellaceae_g-Rikenella	48	0	4	21	0	0	0	0	14	0	0	0	0	0	0	0	0	0	0	0	0	0	0	9	0	0	0	0	0	0	0	0	0	0	0	0	0	0	0	0	0
Bacteria_p-Firmicutes_c-Bacilli_o-Bacillales_f-Family_XI_g-Gemella	26	0	1	0	0	0	2	1	0	0	1	0	0	0	9	1	0	4	0	0	0	0	0	0	5	0	0	0	2	0	0	0	0	0	0	0	0	0	0	0	0
Bacteria_p-Firmicutes_c-Clostridia_o-Clostridiales_f-Family_XIII_g-Anaerovorax	26	0	0	0	25	1	0	0	0	0	0	0	0	0	0	0	0	0	0	0	0	0	0	0	0	0	0	0	0	0	0	0	0	0	0	0	0	0	0	0	0
Bacteria_p-Actinobacteria_c-Coriobacteriia_o-Coriobacteriales_f-Atopobiaceae_g-Coriobacteriaceae_UCG-002	26	0	0	0	0	0	0	3	0	0	0	0	0	0	0	0	7	0	0	0	12	0	0	0	3	0	1	0	0	0	0	0	0	0	0	0	0	0	0	0	0
Bacteria_p-Firmicutes_c-Clostridia_o-Clostridiales_f-Peptococcaceae_g-Dehalobacterium	39	2	1	4	1	0	0	0	6	0	0	6	2	0	0	5	0	0	0	0	2	0	0	2	3	1	0	1	0	0	3	0	0	0	0	0	0	0	0	0	0
Bacteria_p-Firmicutes_c-Clostridia_o-Clostridiales_f-Ruminococcaceae_g-Harryflintia	48	3	0	7	4	1	0	0	4	0	0	3	0	0	0	2	0	13	0	0	0	0	0	2	4	0	0	4	1	0	0	0	0	0	0	0	0	0	0	0	0
Bacteria_p-Actinobacteria_c-Coriobacteriia_o-Coriobacteriales_f-Atopobiaceae_g-Atopobium	21	0	0	0	1	0	0	4	1	0	2	0	0	0	3	2	0	1	0	2	1	1	0	1	0	0	0	2	0	0	0	0	0	0	0	0	0	0	0	0	0
Bacteria_p-Firmicutes_c-Bacilli_o-Lactobacillales_f-Leuconostocaceae_g-Leuconostoc	21	0	0	0	0	0	0	1	0	0	0	0	0	0	16	0	1	0	0	0	0	0	0	0	1	0	0	2	0	0	0	0	0	0	0	0	0	0	0	0	0
Bacteria_p-Actinobacteria_c-Actinobacteria_o-Corynebacteriales_f-Corynebacteriaceae_g-Corynebacterium_1	20	0	0	0	0	0	0	0	0	0	0	0	1	1	0	0	0	0	0	0	0	1	0	0	0	0	0	17	0	0	0	0	0	0	0	0	0	0	0	0	0
Archaea_p-Euryarchaeota_c-Methanobacteria_o-Methanobacteriales_f-Methanobacteriaceae_g-Methanosphaera	19	0	4	0	0	0	0	0	0	0	0	0	0	0	0	0	0	0	0	0	0	0	0	0	5	0	0	10	0	0	0	0	0	0	0	0	0	0	0	0	0
Bacteria_p-Firmicutes_c-Clostridia_o-Clostridiales_f-Eubacteriaceae_g-Anaerofustis	32	0	0	12	0	0	0	6	0	0	1	0	0	3	0	0	0	0	0	1	1	1	2	2	0	0	1	0	0	1	0	1	0	0	0	0	0	0	0	0	0
Bacteria_p-Firmicutes_c-Clostridia_o-Clostridiales_f-Peptostreptococcaceae_g-Peptostreptococcus	18	0	0	0	0	0	0	0	1	0	2	0	0	0	0	0	0	0	0	0	0	1	0	0	14	0	0	0	0	0	0	0	0	0	0	0	0	0	0	0	0
Bacteria_p-Firmicutes_c-Clostridia_o-Clostridiales_f-Lachnospiraceae_g-Cuneatibacter	20	0	0	6	3	0	0	0	0	1	0	3	0	0	1	0	0	3	0	0	0	0	0	0	0	0	0	0	0	1	0	0	0	0	0	0	0	0	0	2	0
Bacteria_p-Firmicutes_c-Clostridia_o-Clostridiales_f-Lachnospiraceae_g-Lachnospiraceae_NC2004_group	18	0	0	0	0	0	0	0	0	0	0	1	11	0	1	0	0	0	0	0	0	0	0	0	0	0	0	4	1	0	0	0	0	0	0	0	0	0	0	0	0
Bacteria_p-Firmicutes_c-Clostridia_o-Clostridiales_f-Eubacteriaceae_g-Eubacterium	27	0	0	0	0	3	0	0	0	0	0	0	0	0	0	0	0	15	0	6	0	0	0	1	0	0	0	0	2	0	0	0	0	0	0	0	0	0	0	0	0
Bacteria_p-Firmicutes_c-Clostridia_o-Clostridiales_f-Christensenellaceae_g-Christensenella	18	1	0	6	0	0	0	1	2	0	0	0	1	0	0	2	1	0	0	0	1	3	0	0	0	0	0	0	0	0	0	0	0	0	0	0	0	0	0	0	0
Bacteria_p-Firmicutes_c-Clostridia_o-Clostridiales_f-Lachnospiraceae_g-Lachnospiraceae_NK4B4_group	15	0	8	0	0	0	0	0	0	0	0	0	0	0	0	0	0	0	0	0	0	0	0	7	0	0	0	0	0	0	0	0	0	0	0	0	0	0	0	0	0
Bacteria_p-Proteobacteria_c-Gammaproteobacteria_o-Enterobacteriales_f-Enterobacteriaceae_g-Morganella	15	0	0	0	0	0	5	0	4	0	0	0	0	0	0	4	0	0	0	0	0	2	0	0	0	0	0	0	0	0	0	0	0	0	0	0	0	0	0	0	0
Bacteria_p-Proteobacteria_c-Gammaproteobacteria_o-Betaproteobacteriales_f-Burkholderiaceae_g-Comamonas	15	0	0	0	0	0	0	1	14	0	0	0	0	0	0	0	0	0	0	0	0	0	0	0	0	0	0	0	0	0	0	0	0	0	0	0	0	0	0	0	0
Bacteria_p-Firmicutes_c-Clostridia_o-Clostridiales_f-Family_XI_g-Parvimonas	15	0	0	0	0	0	0	0	0	0	0	0	0	1	0	3	0	0	1	0	0	5	0	0	4	0	0	1	0	0	0	0	0	0	0	0	0	0	0	0	0
Bacteria_p-Bacteroidetes_c-Bacteroidia_o-Bacteroidales_f-Porphyromonadaceae_g-Porphyromonas	15	0	0	0	0	0	0	0	0	0	0	0	0	0	0	15	0	0	0	0	0	0	0	0	0	0	0	0	0	0	0	0	0	0	0	0	0	0	0	0	0
Bacteria_p-Firmicutes_c-Clostridia_o-Clostridiales_f-Clostridiaceae_1_g-Sarcina	14	0	1	0	0	8	0	0	0	0	0	0	0	0	0	4	0	0	0	0	0	0	0	0	0	1	0	0	0	0	0	0	0	0	0	0	0	0	0	0	0
Bacteria_p-Bacteroidetes_c-Bacteroidia_o-Bacteroidales_f-Rikenellaceae_g-hoa5-07d05_gut_group	34	0	0	4	23	0	0	0	0	1	0	0	0	0	0	1	0	0	0	0	0	1	3	0	0	0	0	1	0	0	0	0	0	0	0	0	0	0	0	0	0
Bacteria_p-Firmicutes_c-Clostridia_o-Clostridiales_f-Christensenellaceae_g-Catabacter	40	0	0	2	2	7	0	11	0	0	0	1	0	0	0	2	0	0	2	0	0	0	2	0	6	0	4	1	0	0	0	0	0	0	0	0	0	0	0	0	0
Bacteria_p-Firmicutes_c-Negativicutes_o-Selenomonadales_f-Veillonellaceae_g-Selenomonas_3	36	0	0	0	0	0	0	0	0	0	31	0	0	0	0	0	0	0	0	0	0	0	0	0	0	0	0	0	0	1	0	4	0	0	0	0	0	0	0	0	0
Bacteria_p-Firmicutes_c-Clostridia_o-Clostridiales_f-Clostridiaceae_1_g-Clostridium_sensu_stricto_13	13	0	0	0	0	0	0	0	0	0	0	0	0	0	0	0	0	0	0	0	11	0	0	0	0	0	0	0	2	0	0	0	0	0	0	0	0	0	0	0	0
Bacteria_p-Firmicutes_c-Clostridia_o-Clostridiales_f-Lachnospiraceae_g-43583	13	1	0	1	0	0	0	0	1	1	0	1	1	0	0	0	0	0	0	0	0	0	0	0	0	0	0	6	1	0	0	0	0	0	0	0	0	0	0	0	0
Bacteria_p-Firmicutes_c-Clostridia_o-Clostridiales_f-Peptostreptococcaceae_g-Asaccharospora	15	1	3	0	1	0	0	0	0	0	2	0	0	0	0	0	0	0	0	2	0	0	0	0	0	0	1	0	0	0	0	5	0	0	0	0	0	0	0	0	0
Bacteria_p-Proteobacteria_c-Gammaproteobacteria_o-Enterobacteriales_f-Enterobacteriaceae_g-Pseudocitrobacter	12	0	0	1	0	0	0	0	0	0	0	4	0	0	0	0	0	0	0	0	7	0	0	0	0	0	0	0	0	0	0	0	0	0	0	0	0	0	0	0	0
Bacteria_p-Bacteroidetes_c-Bacteroidia_o-Bacteroidales_f-Prevotellaceae_g-Prevotella_6	15	1	0	0	0	0	0	0	0	0	0	0	0	0	0	0	0	0	0	0	0	0	0	2	12	0	0	0	0	0	0	0	0	0	0	0	0	0	0	0	0
Bacteria_p-Proteobacteria_c-Gammaproteobacteria_o-Betaproteobacteriales_f-Neisseriaceae_g-Neisseria	11	1	0	0	0	0	2	0	0	0	0	0	0	0	0	0	0	4	0	0	0	1	0	0	0	0	0	0	0	3	0	0	0	0	0	0	0	0	0	0	0
Bacteria_p-Firmicutes_c-Bacilli_o-Lactobacillales_f-Leuconostocaceae_g-Weissella	19	0	0	0	1	0	0	0	0	0	0	0	1	0	0	0	0	3	0	0	0	1	7	0	0	0	1	0	0	0	5	0	0	0	0	0	0	0	0	0	0
Bacteria_p-Firmicutes_c-Clostridia_o-Clostridiales_f-Family_XI_g-Ezakiella	12	0	0	0	0	2	0	0	0	0	1	0	0	3	0	0	0	0	0	0	0	0	0	0	6	0	0	0	0	0	0	0	0	0	0	0	0	0	0	0	0
Bacteria_p-Proteobacteria_c-Deltaproteobacteria_o-Desulfovibrionales_f-Desulfovibrionaceae_g-Mailhella	10	0	0	0	0	0	10	0	0	0	0	0	0	0	0	0	0	0	0	0	0	0	0	0	0	0	0	0	0	0	0	0	0	0	0	0	0	0	0	0	0
Bacteria_p-Firmicutes_c-Erysipelotrichia_o-Erysipelotrichales_f-Erysipelotrichaceae_g-Faecalicoccus	10	0	0	0	0	0	0	0	0	0	0	0	0	0	0	5	0	0	0	0	0	0	1	0	4	0	0	0	0	0	0	0	0	0	0	0	0	0	0	0	0
Bacteria_p-Actinobacteria_c-Coriobacteriia_o-Coriobacteriales_f-Coriobacteriales_Incertae_Sedis_g-Raoultibacter	9	0	0	0	0	0	0	2	0	0	0	0	0	0	0	1	0	0	0	1	1	0	0	0	3	0	0	1	0	0	0	0	0	0	0	0	0	0	0	0	0
Bacteria_p-Firmicutes_c-Bacilli_o-Bacillales_f-Staphylococcaceae_g-Staphylococcus	9	0	0	0	0	0	0	0	0	0	0	0	0	0	0	1	0	0	0	0	0	0	0	0	0	0	0	8	0	0	0	0	0	0	0	0	0	0	0	0	0
Bacteria_p-Bacteroidetes_c-Bacteroidia_o-Flavobacteriales_f-Flavobacteriaceae_g-Flavobacterium	8	1	0	0	0	0	0	7	0	0	0	0	0	0	0	0	0	0	0	0	0	0	0	0	0	0	0	0	0	0	0	0	0	0	0	0	0	0	0	0	0
Bacteria_p-Firmicutes_c-Clostridia_o-Clostridiales_f-Syntrophomonadaceae_g-Pelospora	8	0	0	1	0	0	0	0	5	0	0	0	0	0	0	0	0	0	0	0	0	0	0	0	0	0	0	2	0	0	0	0	0	0	0	0	0	0	0	0	0
Bacteria_p-Firmicutes_c-Clostridia_o-Clostridiales_f-Clostridiaceae_1_g-Clostridium_sensu_stricto_4	13	2	5	0	0	0	0	0	1	2	0	0	0	0	0	0	0	0	0	0	0	0	0	0	0	0	0	0	0	0	1	2	0	0	0	0	0	0	0	0	0
Bacteria_p-Firmicutes_c-Clostridia_o-Clostridiales_f-Syntrophomonadaceae_g-Syntrophomonas	7	0	0	7	0	0	0	0	0	0	0	0	0	0	0	0	0	0	0	0	0	0	0	0	0	0	0	0	0	0	0	0	0	0	0	0	0	0	0	0	0
Bacteria_p-Firmicutes_c-Erysipelotrichia_o-Erysipelotrichales_f-Erysipelotrichaceae_g-Candidatus_Stoquefichus	7	0	0	0	2	0	0	0	2	0	0	0	0	0	0	0	0	0	0	0	0	0	0	3	0	0	0	0	0	0	0	0	0	0	0	0	0	0	0	0	0
Bacteria_p-Proteobacteria_c-Gammaproteobacteria_o-Pseudomonadales_f-Moraxellaceae_g-Acinetobacter	7	0	0	0	0	0	0	0	2	0	1	0	0	0	0	0	0	0	0	0	0	0	0	0	0	0	0	4	0	0	0	0	0	0	0	0	0	0	0	0	0
Bacteria_p-Firmicutes_c-Clostridia_o-Clostridiales_f-Family_XI_g-Finegoldia	7	0	0	0	0	0	0	0	0	0	0	0	0	4	0	0	0	0	0	0	0	0	0	0	3	0	0	0	0	0	0	0	0	0	0	0	0	0	0	0	0
Bacteria_p-Fusobacteria_c-Fusobacteriia_o-Fusobacteriales_f-Leptotrichiaceae_g-Leptotrichia	6	0	0	0	0	0	0	0	0	0	3	0	0	0	3	0	0	0	0	0	0	0	0	0	0	0	0	0	0	0	0	0	0	0	0	0	0	0	0	0	0
Bacteria_p-Firmicutes_c-Clostridia_o-Clostridiales_f-Lachnospiraceae_g-Abyssivirga	5	0	0	5	0	0	0	0	0	0	0	0	0	0	0	0	0	0	0	0	0	0	0	0	0	0	0	0	0	0	0	0	0	0	0	0	0	0	0	0	0
Bacteria_p-Firmicutes_c-Clostridia_o-Clostridiales_f-Family_XI_g-Peptoniphilus	4	0	0	0	0	0	0	0	0	0	0	0	0	0	2	0	0	0	0	0	0	0	0	0	1	0	0	0	1	0	0	0	0	0	0	0	0	0	0	0	0
Bacteria_p-Firmicutes_c-Clostridia_o-Clostridiales_f-Lachnospiraceae_g-Oribacterium	4	0	0	0	0	0	0	0	0	0	0	0	0	0	0	0	0	0	0	0	0	0	0	0	4	0	0	0	0	0	0	0	0	0	0	0	0	0	0	0	0
Bacteria_p-Proteobacteria_c-Alphaproteobacteria_o-Caulobacterales_f-Caulobacteraceae_g-Brevundimonas	3	0	0	0	0	0	0	3	0	0	0	0	0	0	0	0	0	0	0	0	0	0	0	0	0	0	0	0	0	0	0	0	0	0	0	0	0	0	0	0	0
Bacteria_p-Bacteroidetes_c-Bacteroidia_o-Cytophagales_f-Spirosomaceae_g-Arcicella	3	0	0	0	0	0	0	0	0	2	0	0	0	0	0	0	0	0	0	0	0	0	0	0	0	0	0	0	0	0	1	0	0	0	0	0	0	0	0	0	0
Bacteria_p-Proteobacteria_c-Gammaproteobacteria_o-Enterobacteriales_f-Enterobacteriaceae_g-Trabulsiella	3	0	3	0	0	0	0	0	0	0	0	0	0	0	0	0	0	0	0	0	0	0	0	0	0	0	0	0	0	0	0	0	0	0	0	0	0	0	0	0	0
Bacteria_p-Proteobacteria_c-Alphaproteobacteria_o-Rhizobiales_f-Beijerinckiaceae_g-Bosea	2	0	0	0	0	0	0	2	0	0	0	0	0	0	0	0	0	0	0	0	0	0	0	0	0	0	0	0	0	0	0	0	0	0	0	0	0	0	0	0	0
Bacteria_p-Proteobacteria_c-Gammaproteobacteria_o-Pasteurellales_f-Pasteurellaceae_g-Cricetibacter	2	0	0	0	0	0	0	0	2	0	0	0	0	0	0	0	0	0	0	0	0	0	0	0	0	0	0	0	0	0	0	0	0	0	0	0	0	0	0	0	0
Bacteria_p-Firmicutes_c-Clostridia_o-Clostridiales_f-Lachnospiraceae_g-Parasporobacterium	3	0	0	0	0	0	0	0	2	0	0	1	0	0	0	0	0	0	0	0	0	0	0	0	0	0	0	0	0	0	0	0	0	0	0	0	0	0	0	0	0
Bacteria_p-Proteobacteria_c-Gammaproteobacteria_o-Pseudomonadales_f-Moraxellaceae_g-Psychrobacter	2	0	0	0	0	0	0	0	0	0	2	0	0	0	0	0	0	0	0	0	0	0	0	0	0	0	0	0	0	0	0	0	0	0	0	0	0	0	0	0	0
Bacteria_p-Proteobacteria_c-Gammaproteobacteria_o-Enterobacteriales_f-Enterobacteriaceae_g-Atlantibacter	1	0	0	0	0	0	0	0	0	0	0	0	0	0	0	0	0	0	0	0	0	0	0	1	0	0	0	0	0	0	0	0	0	0	0	0	0	0	0	0	0
																	A147
																	A147

## Sheet: otus97-mothur_linux
taxonomy	total	A003	A014	A018	A036	A042	A056	A063	A070	A080	A081	A093	A131	A139	A140	A147	A157	A160	A167	A169	A174	A181	A190	A215	A224	A235	A239	A243	A244	A258	A260	A262	C023	C035	C059	C072	C089	C114	C145	C146	C209
Root	2812333	116830	99722	115750	144954	44387	72487	82417	116006	19870	88772	89043	50889	31503	47287	61639	24805	43874	75981	81120	116073	92851	84754	95657	86319	22537	106660	102228	63060	72102	29782	126742	122337	22290	52914	50597	27241	30704	25611	37112	37426
Bacteria;Bacteroidetes;Bacteroidia;Bacteroidales;Bacteroidaceae;Bacteroides;	613044	4702	3951	25008	41543	13317	2470	1311	11576	4290	43485	13807	13835	81	6300	9905	7385	14588	10837	30682	8785	27945	26457	8921	9383	3516	22159	23612	20534	33665	9999	55716	27986	833	5602	4861	14206	10528	12575	9963	16725
Bacteria;Firmicutes;Clostridia;Clostridiales;Lachnospiraceae;Lachnospiraceae_unclassified;	233469	5478	4257	5088	7113	3594	19	4925	9693	2817	9984	7472	4480	3617	6183	6673	1229	3231	8493	20135	4369	3489	6336	9518	6893	997	4571	13586	6933	4122	1891	18657	10569	1092	5838	6057	4254	2461	2014	2236	3105
Bacteria;Bacteroidetes;Bacteroidia;Bacteroidales;Rikenellaceae;Alistipes;	154901	10373	691	16001	16824	6067	1	170	9028	891	3	5954	4767	16	1235	2368	1921	523	822	3432	9197	6059	5953	7079	4185	1307	10073	5972	2528	1	1609	2184	4862	2208	2819	2266	576	364	562	1047	2963
Bacteria;Firmicutes;Clostridia;Clostridiales;Ruminococcaceae;Faecalibacterium;	153786	6416	2715	2658	4601	3246	1	370	5042	2498	11	2547	3573	1392	3765	3436	641	3725	5142	2715	5911	9237	10522	6919	3941	2855	193	9742	3266	10176	2012	13631	7050	393	1685	6225	1425	0	1615	2494	0
Bacteria;Bacteroidetes;Bacteroidia;Bacteroidales;Bacteroidales_unclassified;Bacteroidales_unclassified;	147748	5845	3476	10017	8900	1068	168	501	23041	1411	21	6367	1582	23	1079	3601	2516	999	1069	10	8298	11581	4525	6868	5264	1027	2627	6662	1977	1994	308	4161	5744	1186	4349	1744	766	2202	1438	2254	1079
Bacteria;Firmicutes;Clostridia;Clostridiales;Ruminococcaceae;Ruminococcaceae_ge;	88195	1261	2067	2446	1221	875	19	33621	984	578	1332	8226	758	1345	235	441	159	155	9098	1033	6279	1194	915	502	6184	381	1134	545	162	108	207	503	217	600	1790	327	135	387	24	702	45
Bacteria;Bacteroidetes;Bacteroidia;Bacteroidales;Prevotellaceae;Prevotella_7;	85133	26261	28877	1	2	2	14	732	0	0	0	0	2	2	8273	2	0	1	0	1	8980	1	1	1894	3657	282	1	0	0	0	0	0	0	0	1	6145	0	1	0	0	0
Bacteria;Firmicutes;Clostridia;Clostridiales;Ruminococcaceae;Ruminococcaceae_unclassified;	74621	2662	1887	2275	2633	863	23	669	3681	453	230	4301	1141	158	1957	3060	544	891	1157	1260	3815	2897	442	5043	4369	588	3817	3462	1635	706	948	1442	2225	4680	4119	1686	333	1231	527	591	220
Bacteria;Firmicutes;Clostridia;Clostridiales;Ruminococcaceae;Subdoligranulum;	67986	1934	723	4858	4	1258	0	3170	2093	36	1	3720	756	922	926	2088	887	898	2197	596	4300	2579	3068	732	2879	1185	3711	2626	1328	2958	304	2433	5243	1	2445	1155	501	489	710	595	1677
Bacteria;Firmicutes;Clostridia;Clostridiales;Ruminococcaceae;CAG-352;	63550	509	357	2720	4737	566	14	10338	638	234	959	2768	264	338	0	956	620	663	519	1886	2045	1184	396	3590	1750	444	13026	458	1839	4993	1360	0	837	205	504	227	0	422	148	535	501
Bacteria;Firmicutes;Clostridia;Clostridiales;Ruminococcaceae;Ruminococcus_1;	53323	188	1645	10823	2000	814	1	29	391	1	3390	801	360	1	355	2333	3219	933	2247	1482	2692	804	453	412	2087	114	635	2542	446	3	210	2	6179	211	1253	450	4	482	20	3214	97
Bacteria;Firmicutes;Clostridia;Clostridiales;Lachnospiraceae;Agathobacter;	51385	2948	1064	2	1	1521	0	333	526	306	2221	1066	2571	1718	286	616	1	5151	5578	1	1071	5143	398	536	513	85	4277	1856	2945	2	72	860	932	173	985	1872	123	1048	1267	1252	65
Bacteria;Firmicutes;Clostridia;Clostridiales;Lachnospiraceae;Blautia;	50369	1837	418	2347	2596	200	46	3821	440	296	1093	1240	475	4476	552	351	613	727	1330	413	2081	1842	1621	1207	1103	230	3463	1024	806	3695	494	3010	958	276	1053	777	636	1040	437	264	1081
Bacteria;Proteobacteria;Alphaproteobacteria;Alphaproteobacteria_unclassified;Alphaproteobacteria_unclassified;Alphaproteobacteria_unclassified;	50349	5911	723	407	0	1	0	8	3510	1631	0	286	660	10	828	3701	1	0	4	2090	1	0	160	7972	98	10	173	3457	1943	0	1225	0	12598	29	0	37	0	153	0	2	2720
Bacteria;Verrucomicrobia;Verrucomicrobiae;Verrucomicrobiales;Verrucomicrobiaceae;uncultured;	48330	673	14	107	6416	9	15790	0	1958	4	2	739	230	133	37	562	0	164	2384	175	570	2	2	29	1455	61	5812	6	825	42	32	3	4262	6	1952	6	2	3360	2	6	498
Bacteria;Bacteria_unclassified;Bacteria_unclassified;Bacteria_unclassified;Bacteria_unclassified;Bacteria_unclassified;	46443	1828	3400	79	238	148	25444	3	413	108	156	45	257	0	734	380	13	2	24	4	3743	482	20	1581	76	10	236	1386	90	7	22	1	1848	36	1056	2384	18	20	4	38	109
Bacteria;Firmicutes;Clostridia;Clostridiales;Ruminococcaceae;Ruminococcaceae_UCG-002;	42929	2227	717	2228	1521	1062	0	1010	3151	1	0	930	636	2	944	370	140	65	423	634	3544	2117	155	1989	5220	704	3361	350	1761	18	1403	707	1130	288	1369	1970	27	507	61	187	0
Bacteria;Bacteroidetes;Bacteroidia;Bacteroidales;Tannerellaceae;Parabacteroides;	38064	1340	93	1675	17	669	1172	52	135	582	0	1423	814	9	307	828	552	897	224	1497	806	1920	5292	1568	230	49	2866	1190	432	2296	745	3069	1894	81	218	190	0	401	284	1047	1200
Bacteria;Firmicutes;Clostridia;Clostridiales;Christensenellaceae;Christensenellaceae_R-7_group;	35805	756	466	2212	180	890	3	51	1163	40	0	680	2258	0	837	1868	33	6	3815	749	907	1278	3	544	6056	347	210	4582	374	0	3	77	4241	234	763	113	0	0	13	18	35
Bacteria;Firmicutes;Negativicutes;Selenomonadales;Acidaminococcaceae;Phascolarctobacterium;	35527	765	1910	1967	0	398	2818	82	0	462	1	8167	2078	108	2	74	694	382	1969	4999	496	25	0	260	1286	0	2	1	141	0	297	0	2316	258	1338	67	328	0	806	11	1019
Bacteria;Bacteroidetes;Bacteroidia;Bacteroidales;Prevotellaceae;Prevotellaceae_unclassified;	34655	2345	1273	2	3	3	44	1221	8234	5	29	3	3	8	1403	732	0	2	1	2	8548	4	2	2402	391	234	3	1345	0	2	1	0	6	0	5060	1342	1	1	0	0	0
Bacteria;Firmicutes;Clostridia;Clostridiales;Ruminococcaceae;Ruminococcaceae_UCG-014;	34274	2737	2004	4069	75	14	2	980	2506	72	1	3400	286	3	475	1690	2	29	163	1	2311	41	1468	2434	3970	957	1815	1041	709	6	169	1	2	33	796	0	0	10	0	0	2
Bacteria;Firmicutes;Clostridia;Clostridiales;Lachnospiraceae;uncultured;	31864	540	348	417	1529	382	9	414	559	843	1829	1051	886	1861	1174	1389	25	269	2329	1953	695	362	433	1207	409	85	3157	947	975	176	405	811	937	64	466	1195	635	189	127	296	486
Bacteria;Proteobacteria;Gammaproteobacteria;Betaproteobacteriales;Burkholderiaceae;Burkholderiaceae_unclassified;	31527	4575	1729	89	247	14	1	80	3129	481	1	0	1139	171	1084	23	0	1	166	67	866	2683	4114	2922	125	121	725	0	0	2	578	1	4992	64	186	0	0	947	11	193	0
Bacteria;Bacteroidetes;Bacteroidia;Bacteroidales;Tannerellaceae;Tannerellaceae_unclassified;	29917	4	3458	2140	8257	446	0	100	3016	0	0	0	759	19	95	325	312	2	333	0	1624	2	12	375	273	258	1561	0	1053	0	147	1	3179	158	429	199	1	922	0	457	0
Bacteria;Firmicutes;Clostridia;Clostridiales;Lachnospiraceae;Roseburia;	29301	630	282	355	284	151	0	245	893	64	2523	838	346	73	253	536	164	4111	1039	1116	192	185	639	215	321	295	512	1419	3310	1	1361	1332	1558	143	302	427	817	349	1621	366	33
Bacteria;Proteobacteria;Gammaproteobacteria;Betaproteobacteriales;Burkholderiaceae;Parasutterella;	27607	0	1	25	11000	590	3	0	0	0	0	2009	24	1	2	653	582	1705	477	0	75	0	661	5	11	1	0	632	607	962	0	4796	0	25	295	915	450	0	0	151	949
Bacteria;Firmicutes;Clostridia;Clostridiales;Ruminococcaceae;Ruminiclostridium_6;	23810	5374	697	115	1086	257	11	11	2428	0	191	786	806	1	263	0	0	470	53	0	158	0	0	5848	104	239	0	0	266	0	665	16	2634	529	66	16	0	2	2	4	712
Bacteria;Actinobacteria;Actinobacteria;Bifidobacteriales;Bifidobacteriaceae;Bifidobacterium;	22148	60	107	1121	437	581	11	1924	34	0	2441	1471	14	992	21	394	767	135	3762	0	1201	1798	110	12	848	0	1398	123	76	2	4	272	77	1778	103	0	0	1	0	38	35
Bacteria;Firmicutes;Erysipelotrichia;Erysipelotrichales;Erysipelotrichaceae;Erysipelotrichaceae_unclassified;	21290	161	96	771	153	21	0	6494	27	7	0	1300	406	3430	422	21	5	104	1325	890	26	286	415	181	331	57	1165	148	77	317	57	1297	341	54	156	177	516	16	8	32	0
Bacteria;Proteobacteria;Gammaproteobacteria;Enterobacteriales;Enterobacteriaceae;Escherichia-Shigella;	20823	1	1	152	115	15	1651	82	25	674	148	1378	1106	28	8	19	2	9	14	2	6323	224	0	24	169	34	17	200	1560	3627	1057	0	10	5	0	0	3	11	13	2111	5
Bacteria;Firmicutes;Clostridia;Clostridiales;Lachnospiraceae;Fusicatenibacter;	18060	342	96	318	2168	168	0	155	236	74	1085	357	278	621	85	537	0	538	1827	257	427	1378	1708	284	306	220	225	54	198	1	172	976	604	0	220	658	482	0	105	185	715
Bacteria;Firmicutes;Clostridia;Clostridiales;Lachnospiraceae;Lachnoclostridium;	17591	792	195	247	237	206	0	1979	249	139	846	107	106	3666	534	208	78	28	401	136	1370	816	91	102	457	89	417	82	163	804	127	501	321	329	262	195	82	80	22	836	291
Bacteria;Proteobacteria;Gammaproteobacteria;Enterobacteriales;Enterobacteriaceae;Enterobacteriaceae_unclassified;	17341	134	200	1	171	1	12076	1	21	3	204	4	9	0	534	7	0	16	0	0	16	1	1	512	335	1	12	105	6	12	540	1	562	0	2	0	0	0	3	1850	0
Bacteria;Firmicutes;Negativicutes;Selenomonadales;Veillonellaceae;Veillonella;	15934	27	3	8	8	367	2	41	74	50	12806	21	11	25	342	56	0	291	13	28	1	36	38	12	28	1	16	65	8	51	2	525	44	253	3	3	0	24	0	594	57
Bacteria;Firmicutes;Bacilli;Lactobacillales;Streptococcaceae;Streptococcus;	15212	69	91	72	26	22	8723	133	46	19	574	13	31	56	1856	587	10	312	466	77	23	196	35	9	61	9	40	572	5	23	50	29	31	229	4	23	11	42	2	572	63
Bacteria;Bacteroidetes;Bacteroidia;Bacteroidia_unclassified;Bacteroidia_unclassified;Bacteroidia_unclassified;	15192	1	37	1651	2733	255	0	0	424	1	0	698	89	0	0	224	0	0	1	0	1	756	2	161	72	0	2422	2	681	0	1	4007	246	3	97	47	2	39	0	465	74
Bacteria;Firmicutes;Negativicutes;Selenomonadales;Veillonellaceae;Dialister;	15066	1104	0	0	4757	104	73	0	253	0	179	0	0	0	410	0	3	0	0	0	0	492	117	262	3	715	5034	128	246	45	2	1022	1	2	0	0	0	109	4	1	0
Bacteria;Firmicutes;Clostridia;Clostridiales;Ruminococcaceae;Ruminococcaceae_UCG-005;	14581	1182	721	320	166	699	12	96	999	5	1	231	355	12	259	659	6	13	45	118	1312	155	38	1872	1389	248	23	419	269	31	450	60	516	156	1168	391	2	16	11	116	40
Bacteria;Bacteroidetes;Bacteroidia;Bacteroidales;Prevotellaceae;Prevotellaceae_UCG-003;	13808	1535	426	0	1	224	0	40	3295	0	0	1	0	1	576	1078	299	1	1842	2	618	0	2188	1094	278	309	0	0	0	0	0	0	0	0	0	0	0	0	0	0	0
Bacteria;Firmicutes;Clostridia;Clostridiales;Lachnospiraceae;Lachnospiraceae_ge;	13759	178	295	527	717	57	0	1023	44	24	77	325	167	761	489	148	323	2	932	0	406	196	515	97	306	442	361	151	401	1	40	114	256	122	738	3118	31	137	44	25	169
Bacteria;Actinobacteria;Coriobacteriia;Coriobacteriales;Coriobacteriaceae;Collinsella;	13218	917	188	110	29	120	0	1508	75	4	0	87	0	1485	219	87	103	451	574	1	1397	531	242	87	2766	52	1102	139	133	0	11	49	230	205	174	15	0	8	57	62	0
Bacteria;Bacteroidetes;Bacteroidia;Bacteroidales;Marinifilaceae;Odoribacter;	12926	736	151	1236	1	175	0	66	954	0	0	1286	626	0	192	269	142	0	89	364	1098	742	651	270	319	154	262	1115	471	1	105	0	296	7	41	188	282	244	0	259	134
Bacteria;Firmicutes;Clostridia;Clostridiales;Ruminococcaceae;Ruminococcaceae_UCG-010;	11119	663	1578	880	25	28	0	8	1755	0	0	218	174	0	151	88	12	27	1	56	1219	0	0	469	363	91	0	2676	3	0	23	0	377	54	92	13	0	0	0	75	0
Bacteria;Firmicutes;Clostridia;Clostridiales;Ruminococcaceae;Flavonifractor;	10282	285	63	302	880	35	1	126	125	62	1557	131	79	85	125	247	39	300	123	439	357	501	246	129	234	96	636	139	155	128	21	613	167	641	333	77	87	277	303	58	80
Bacteria;Bacteroidetes;Bacteroidia;Bacteroidales;Rikenellaceae;Rikenellaceae_RC9_gut_group;	9883	0	7230	1	0	1	0	1	2525	0	0	0	0	0	0	0	0	0	0	0	0	0	0	4	7	114	0	0	0	0	0	0	0	0	0	0	0	0	0	0	0
Bacteria;Firmicutes;Clostridia;Clostridiales;Clostridiales_unclassified;Clostridiales_unclassified;	9857	1500	657	445	120	361	45	62	540	11	8	125	58	5	23	438	17	12	31	27	459	173	5	1751	254	33	82	666	40	2	19	7	744	790	146	89	3	3	24	47	35
Bacteria;Firmicutes;Clostridia;Clostridiales;Lachnospiraceae;Butyrivibrio;	8826	0	5688	0	0	0	0	0	0	0	0	0	0	0	0	0	0	0	0	0	0	0	0	0	249	2889	0	0	0	0	0	0	0	0	0	0	0	0	0	0	0
Bacteria;Tenericutes;Mollicutes;Mollicutes_unclassified;Mollicutes_unclassified;Mollicutes_unclassified;	8641	985	2790	108	944	0	0	2	2435	0	0	30	105	0	16	473	1	2	0	0	135	1	0	533	0	0	0	66	0	1	0	1	1	10	0	0	0	1	0	0	1
Bacteria;Firmicutes;Clostridia;Clostridiales;Lachnospiraceae;Coprococcus_2;	8616	1100	578	1528	307	2	0	0	303	0	2	548	500	0	104	166	0	203	0	0	293	0	0	214	552	28	710	0	1	0	0	0	871	0	520	0	0	0	86	0	0
Bacteria;Proteobacteria;Deltaproteobacteria;Desulfovibrionales;Desulfovibrionaceae;Desulfovibrio;	8330	123	292	464	935	161	34	236	38	0	0	158	7	0	139	353	0	0	184	0	427	99	0	612	115	0	278	165	569	0	8	1	24	2450	46	372	0	0	0	22	18
Bacteria;Proteobacteria;Deltaproteobacteria;Desulfovibrionales;Desulfovibrionaceae;Bilophila;	8033	323	46	85	2526	28	120	6	377	40	0	0	53	9	120	258	110	112	23	335	237	67	483	138	49	3	246	125	224	222	209	0	216	39	401	219	183	148	129	71	53
Bacteria;Firmicutes;Clostridia;Clostridiales;Christensenellaceae;Christensenellaceae_unclassified;	7784	206	49	2136	7	697	0	12	678	0	0	63	51	0	67	189	0	0	0	0	1939	50	0	266	839	224	34	93	0	0	0	0	2	5	145	5	0	0	7	13	7
Bacteria;Bacteroidetes;Bacteroidia;Bacteroidales;Prevotellaceae;Alloprevotella;	7728	1	5647	0	2	0	1	5	2	0	2	1	0	0	0	1	0	0	1	0	2	3	1	2028	2	0	4	1	0	1	2	2	8	4	0	1	1	0	0	4	1
Bacteria;Firmicutes;Negativicutes;Selenomonadales;Acidaminococcaceae;Acidaminococcaceae_unclassified;	7644	0	0	0	0	0	0	101	0	0	0	0	0	0	0	2626	191	0	0	0	0	0	1845	0	0	0	0	0	0	0	0	0	0	250	0	1472	0	0	0	1159	0
Bacteria;Bacteroidetes;Bacteroidia;Bacteroidales;Muribaculaceae;Muribaculaceae_ge;	7356	3	100	417	4	3	0	1	6	3	2	1	3	10	1	1998	12	1	3	4	5	29	4	114	17	4	10	3369	0	8	5	9	9	2	48	2	1	1072	45	29	2
Bacteria;Actinobacteria;Coriobacteriia;Coriobacteriales;Eggerthellaceae;Eggerthella;	6180	373	65	277	112	24	0	896	37	24	63	174	30	1575	95	64	47	33	62	90	219	49	108	107	626	45	121	42	70	86	7	170	30	152	178	43	14	40	7	14	11
Bacteria;Firmicutes;Clostridia;Clostridiales;Lachnospiraceae;Tyzzerella;	5522	139	28	80	13	10	0	11	44	12	0	334	19	14	176	228	2	108	236	786	70	82	342	471	39	101	280	352	175	95	104	17	280	40	108	168	121	339	3	12	83
Bacteria;Firmicutes;Clostridia;Clostridiales;Ruminococcaceae;Butyricicoccus;	5064	73	22	222	240	83	0	152	24	34	55	206	70	552	195	64	39	84	578	233	239	60	36	30	36	42	64	105	105	100	50	587	66	22	130	99	34	69	149	93	22
Bacteria;Firmicutes;Clostridia;Clostridiales;Peptostreptococcaceae;Peptostreptococcaceae_unclassified;	4769	249	431	19	97	37	10	111	140	169	105	3	86	2	19	55	8	63	27	61	114	186	0	6	821	6	154	114	52	0	3	1331	210	43	4	2	17	1	4	9	0
Bacteria;Firmicutes;Clostridia;Clostridiales;Ruminococcaceae;Oscillospira;	4694	147	131	71	155	7	0	4	422	84	1	52	18	0	23	31	11	53	124	28	41	15	1162	152	20	71	7	343	37	0	16	626	158	34	115	185	38	110	106	82	14
Bacteria;Firmicutes;Firmicutes_unclassified;Firmicutes_unclassified;Firmicutes_unclassified;Firmicutes_unclassified;	4694	1172	85	849	173	439	5	17	575	6	0	69	12	3	10	126	11	22	7	4	522	64	36	39	25	4	10	114	3	5	12	0	46	114	62	19	0	2	15	10	7
Bacteria;Cyanobacteria;Oxyphotobacteria;Chloroplast;Chloroplast_fa;Chloroplast_ge;	3528	2	9	2	1610	0	5	0	5	7	4	1	0	6	8	23	1	90	557	6	32	0	10	39	2	0	2	746	1	2	4	1	1	67	210	43	4	23	1	3	1
Bacteria;Firmicutes;Erysipelotrichia;Erysipelotrichales;Erysipelotrichaceae;Faecalitalea;	3206	751	218	29	37	1	5	1158	0	11	12	6	54	4	55	15	2	11	3	36	116	61	4	1	294	0	18	101	25	14	1	21	16	2	20	23	3	64	8	4	2
Bacteria;Firmicutes;Clostridia;Clostridiales;Clostridiaceae_1;Clostridiaceae_1_unclassified;	3090	299	687	26	4	14	11	69	40	105	10	0	89	0	1	21	0	14	1	4	72	67	21	5	353	6	15	277	38	0	14	633	0	148	8	1	28	0	2	7	0
Bacteria;Firmicutes;Clostridia;Clostridiales;Family_XIII;Family_XIII_unclassified;	3012	67	30	69	54	27	692	151	63	4	0	40	21	0	13	37	56	22	36	29	40	51	48	22	78	7	1054	33	8	9	6	16	26	41	69	22	2	6	10	19	34
Bacteria;Firmicutes;Negativicutes;Selenomonadales;Veillonellaceae;Veillonellaceae_unclassified;	2985	0	15	0	6	1	23	20	3	0	1	0	0	734	0	201	0	0	0	0	1945	3	0	3	2	0	1	0	0	4	0	0	22	0	0	0	0	0	0	1	0
Bacteria;Firmicutes;Clostridia;Clostridiales;Lachnospiraceae;Dorea;	2183	38	10	28	55	32	0	426	22	30	12	46	10	387	59	32	0	0	75	105	76	33	18	23	144	6	0	28	93	69	28	80	31	5	30	40	20	53	13	0	26
Bacteria;Firmicutes;Clostridia;Clostridiales;Lachnospiraceae;Coprococcus_1;	1976	85	34	254	0	38	0	206	37	0	0	106	23	111	20	22	0	0	120	0	67	113	24	41	162	3	71	14	25	95	27	39	114	0	38	64	0	18	0	5	0
Bacteria;Actinobacteria;Coriobacteriia;Coriobacteriales;Coriobacteriales_unclassified;Coriobacteriales_unclassified;	1767	1	5	125	0	45	0	30	20	0	0	42	12	0	76	87	26	0	258	7	108	0	0	101	302	4	0	181	20	0	0	0	117	90	47	52	0	10	0	1	0
Bacteria;Proteobacteria;Gammaproteobacteria;Pasteurellales;Pasteurellaceae;Pasteurellaceae_unclassified;	1688	72	1	0	0	0	0	0	269	8	472	23	36	1	67	141	0	59	12	0	4	160	2	4	3	0	1	15	8	55	3	67	168	3	1	0	1	0	1	26	5
Bacteria;Firmicutes;Clostridia;Clostridiales;Ruminococcaceae;Ruminococcaceae_NK4A214_group;	1658	30	14	104	981	16	14	2	2	0	0	5	0	0	2	7	9	0	0	0	91	91	0	10	18	9	24	13	12	0	1	0	12	137	15	4	0	0	8	14	13
Bacteria;Cyanobacteria;Melainabacteria;Melainabacteria_unclassified;Melainabacteria_unclassified;Melainabacteria_unclassified;	1434	1	761	0	0	0	0	0	0	0	0	1	1	0	0	0	0	0	0	0	0	0	1	496	0	0	3	2	0	0	0	0	168	0	0	0	0	0	0	0	0
Bacteria;Firmicutes;Clostridia;Clostridiales;Lachnospiraceae;Tyzzerella_3;	1377	0	0	0	131	0	0	11	0	0	0	0	0	374	0	15	0	0	155	0	0	0	97	0	0	0	47	0	38	253	89	0	76	0	91	0	0	0	0	0	0
Bacteria;Firmicutes;Clostridia;Clostridia_unclassified;Clostridia_unclassified;Clostridia_unclassified;	1362	349	0	205	109	83	0	0	72	0	0	4	19	0	9	49	0	0	0	0	187	0	0	30	35	0	0	48	31	0	0	0	0	27	66	0	0	0	0	16	23
Bacteria;Firmicutes;Bacilli;Lactobacillales;Lactobacillaceae;Lactobacillus;	1292	0	6	26	15	565	67	6	14	0	4	8	7	2	9	15	11	25	5	0	63	5	2	40	9	4	26	312	8	4	5	11	6	3	0	3	2	2	0	2	0
Bacteria;Firmicutes;Erysipelotrichia;Erysipelotrichales;Erysipelotrichaceae;Erysipelatoclostridium;	914	0	0	95	47	1	3	34	0	19	46	194	21	3	0	46	35	42	31	13	0	25	8	1	0	4	6	36	29	25	4	28	17	16	10	1	10	38	2	0	24
Bacteria;Firmicutes;Negativicutes;Selenomonadales;Veillonellaceae;Megasphaera;	911	0	0	0	0	119	476	48	3	0	112	0	0	2	4	0	0	4	2	0	0	1	0	3	2	0	0	0	0	0	0	1	1	0	0	0	0	0	133	0	0
Bacteria;Firmicutes;Clostridia;Clostridiales;Family_XIII;Anaerovorax;	899	7	124	2	0	0	0	372	50	0	0	8	0	0	3	0	2	0	0	0	0	14	0	68	150	8	1	37	0	0	1	0	2	1	7	34	0	0	1	7	0
Bacteria;Firmicutes;Erysipelotrichia;Erysipelotrichales;Erysipelotrichaceae;Turicibacter;	804	23	138	0	0	1	0	1	2	77	0	392	21	0	1	1	3	0	0	0	62	3	1	0	39	0	5	12	5	0	2	13	0	0	0	0	0	0	0	2	0
Bacteria;Firmicutes;Clostridia;Clostridiales;Peptostreptococcaceae;Terrisporobacter;	527	20	60	0	0	6	0	26	56	14	0	0	24	0	1	0	0	4	12	0	3	20	0	2	64	0	0	2	6	0	0	162	38	1	0	2	0	0	0	4	0
Bacteria;Proteobacteria;Deltaproteobacteria;Desulfovibrionales;Desulfovibrionaceae;Desulfovibrionaceae_unclassified;	491	0	0	73	1	0	20	0	0	0	0	0	78	0	30	51	0	0	2	0	0	2	0	34	0	0	0	1	0	0	0	0	1	3	7	1	0	70	0	115	2
Bacteria;Verrucomicrobia;Verrucomicrobiae;Opitutales;Puniceicoccaceae;Puniceicoccaceae_ge;	467	175	158	2	0	0	0	0	0	0	0	0	0	0	0	54	0	0	0	0	0	0	0	6	1	0	0	66	0	0	0	0	0	2	3	0	0	0	0	0	0
Bacteria;Firmicutes;Clostridia;Clostridiales;Family_XIII;Family_XIII_ge;	427	20	15	43	55	22	0	1	1	4	0	17	5	0	0	6	20	5	1	0	31	14	0	6	14	0	14	2	4	0	0	0	4	103	10	2	0	0	6	1	1
Bacteria;Firmicutes;Clostridia;Clostridiales;Family_XIII;Family_XIII_AD3011_group;	353	7	2	25	0	6	0	74	5	0	0	28	5	3	5	2	2	10	8	6	18	16	0	2	32	5	6	1	7	2	1	0	4	19	12	23	0	8	3	3	3
Bacteria;Firmicutes;Erysipelotrichia;Erysipelotrichales;Erysipelotrichaceae;Catenibacterium;	346	0	0	0	0	0	0	0	133	0	0	0	0	0	0	0	0	0	0	0	196	0	0	0	17	0	0	0	0	0	0	0	0	0	0	0	0	0	0	0	0
Bacteria;Firmicutes;Clostridia;Clostridiales;Christensenellaceae;uncultured;	344	10	13	25	14	24	0	13	8	1	0	34	2	0	2	19	11	11	3	5	11	18	5	4	37	2	5	7	1	0	1	0	21	1	15	7	0	1	4	7	2
Bacteria;Firmicutes;Erysipelotrichia;Erysipelotrichales;Erysipelotrichaceae;Erysipelothrix;	333	1	0	11	35	5	0	9	2	6	0	18	2	1	2	4	0	5	7	12	0	0	11	14	23	2	51	7	13	45	4	0	4	0	3	0	19	8	0	9	0
Bacteria;Verrucomicrobia;Verrucomicrobiae;Verrucomicrobiae_unclassified;Verrucomicrobiae_unclassified;Verrucomicrobiae_unclassified;	319	1	0	1	13	1	14	0	3	0	0	1	2	1	0	3	0	0	10	1	1	0	0	0	8	0	8	0	3	0	0	1	44	0	140	0	1	54	0	1	7
Bacteria;Synergistetes;Synergistia;Synergistales;Synergistaceae;Synergistaceae_unclassified;	316	5	0	0	187	0	0	6	0	1	0	0	0	0	1	3	0	0	1	0	0	0	0	25	61	0	0	0	0	0	0	0	0	0	24	0	0	0	0	2	0
Bacteria;Firmicutes;Bacilli;Lactobacillales;Enterococcaceae;Enterococcus;	303	1	0	0	22	0	115	0	0	0	4	0	10	0	23	0	50	1	0	0	0	12	9	0	0	1	2	15	38	0	0	0	0	0	0	0	0	0	0	0	0
Bacteria;Proteobacteria;Alphaproteobacteria;Rickettsiales;Mitochondria;Mitochondria_ge;	285	2	4	2	147	0	0	0	2	0	0	0	0	0	1	1	1	4	45	0	3	0	2	2	3	0	0	50	0	0	0	0	0	1	4	8	0	2	1	0	0
Bacteria;Firmicutes;Clostridia;Clostridiales;Clostridiaceae_1;Clostridium_sensu_stricto_1;	249	16	22	0	0	6	64	0	0	12	0	0	10	0	1	0	0	0	0	0	6	14	0	1	43	0	1	3	3	0	0	1	0	0	0	0	0	0	0	46	0
Bacteria;Proteobacteria;Gammaproteobacteria;Pasteurellales;Pasteurellaceae;Haemophilus;	246	0	0	0	0	0	0	0	62	4	13	1	0	0	5	0	0	0	0	0	0	0	0	0	0	0	0	0	0	0	0	0	158	1	1	0	0	0	0	0	1
Bacteria;Proteobacteria;Gammaproteobacteria;Enterobacteriales;Enterobacteriaceae;Proteus;	203	0	0	0	0	0	5	0	0	0	196	0	0	0	0	0	0	0	0	0	0	1	0	0	0	0	0	0	0	0	0	0	0	1	0	0	0	0	0	0	0
Bacteria;Cyanobacteria;Melainabacteria;Gastranaerophilales;Gastranaerophilales_fa;Gastranaerophilales_ge;	202	0	1	1	0	0	0	0	0	0	0	0	195	0	3	0	0	0	0	0	0	0	0	0	0	0	0	0	0	0	1	0	1	0	0	0	0	0	0	0	0
Bacteria;Fusobacteria;Fusobacteriia;Fusobacteriales;Fusobacteriaceae;Fusobacterium;	193	0	0	0	6	0	38	0	1	0	78	0	0	8	3	1	0	1	0	0	0	9	0	0	20	0	0	0	0	0	0	1	6	0	0	0	0	0	0	0	21
Bacteria;Proteobacteria;Gammaproteobacteria;Betaproteobacteriales;Betaproteobacteriales_unclassified;Betaproteobacteriales_unclassified;	161	12	1	2	1	0	0	0	15	0	0	0	3	0	5	0	0	0	0	0	2	2	2	1	0	2	34	0	0	0	1	0	55	0	0	0	0	23	0	0	0
Bacteria;Firmicutes;Clostridia;Clostridiales;Peptococcaceae;Peptococcaceae_unclassified;	158	27	0	9	56	2	1	1	1	0	2	5	0	0	0	2	0	2	0	0	17	0	0	1	0	5	0	2	0	0	0	0	0	1	0	20	0	0	0	4	0
Bacteria;Patescibacteria;Saccharimonadia;Saccharimonadales;Saccharimonadaceae;Saccharimonadaceae_ge;	156	1	1	2	20	1	0	24	25	0	0	8	7	13	0	2	0	2	3	2	2	5	0	8	5	0	0	0	6	3	0	0	8	0	3	2	0	2	0	0	1
Bacteria;Firmicutes;Clostridia;Clostridiales;Ruminococcaceae;uncultured;	152	84	0	0	33	0	0	0	0	0	0	0	0	0	0	35	0	0	0	0	0	0	0	0	0	0	0	0	0	0	0	0	0	0	0	0	0	0	0	0	0
Bacteria;Actinobacteria;Coriobacteriia;Coriobacteriales;Atopobiaceae;Atopobiaceae_unclassified;	148	0	0	0	1	0	0	34	1	0	2	0	0	0	2	3	82	1	0	0	1	0	0	1	3	0	1	8	0	0	0	2	1	0	2	0	0	3	0	0	0
Bacteria;Epsilonbacteraeota;Campylobacteria;Campylobacterales;Campylobacteraceae;Campylobacter;	142	2	0	0	0	0	0	0	1	0	111	0	1	0	0	0	0	1	0	1	0	5	0	0	1	0	0	0	5	3	0	4	4	0	0	0	0	0	0	3	0
Bacteria;Firmicutes;Clostridia;Clostridiales;Lachnospiraceae;Howardella;	118	0	21	0	0	0	0	0	0	0	0	0	0	0	0	0	0	0	0	0	0	0	0	0	85	0	0	12	0	0	0	0	0	0	0	0	0	0	0	0	0
Bacteria;Actinobacteria;Actinobacteria;Actinomycetales;Actinomycetaceae;Actinomyces;	98	1	1	4	2	0	0	31	0	1	1	8	0	5	4	3	0	6	1	0	1	8	0	4	6	0	2	0	2	0	0	0	0	5	0	0	0	0	0	2	0
Bacteria;Firmicutes;Bacilli;Lactobacillales;Lactobacillales_unclassified;Lactobacillales_unclassified;	86	1	1	4	1	0	1	3	1	0	11	0	0	2	11	7	0	13	3	0	2	5	0	0	3	0	1	2	0	0	0	7	1	0	1	0	2	0	1	0	2
Bacteria;Firmicutes;Bacilli;Lactobacillales;Streptococcaceae;Lactococcus;	81	0	0	1	0	0	22	14	0	0	1	0	5	0	0	3	0	0	0	0	9	1	4	3	0	0	1	9	0	0	0	0	7	0	0	0	0	1	0	0	0
Bacteria;Firmicutes;Clostridia;Clostridiales;Ruminococcaceae;Ruminococcaceae_UCG-008;	80	0	2	0	0	0	0	64	0	0	0	0	0	0	0	0	0	0	0	0	0	0	0	1	0	0	0	11	0	0	0	0	0	1	0	0	1	0	0	0	0
Bacteria;Actinobacteria;Actinobacteria;Micrococcales;Micrococcaceae;Rothia;	76	0	0	2	4	0	5	4	1	0	1	0	0	0	18	10	0	2	0	0	2	4	1	0	0	0	0	12	0	0	0	0	2	8	0	0	0	0	0	0	0
Bacteria;Patescibacteria;Saccharimonadia;Saccharimonadales;Saccharimonadales_fa;Saccharimonadales_ge;	70	4	2	5	1	1	0	5	2	0	1	2	0	1	0	1	0	0	2	0	10	2	1	3	0	0	2	0	3	0	0	1	15	0	1	2	0	1	0	2	0
Bacteria;Firmicutes;Erysipelotrichia;Erysipelotrichales;Erysipelotrichaceae;Coprobacillus;	66	0	0	0	2	0	0	0	2	0	0	0	0	12	0	6	0	0	0	0	0	8	2	7	14	2	0	0	2	0	3	0	0	1	0	0	0	0	0	5	0
Bacteria;Verrucomicrobia;Verrucomicrobiae;Verrucomicrobiales;Verrucomicrobiales_unclassified;Verrucomicrobiales_unclassified;	63	0	0	1	1	0	5	0	3	0	0	0	0	0	0	0	0	0	1	0	0	0	0	0	1	0	1	0	0	0	0	0	12	0	30	0	0	8	0	0	0
Bacteria;Firmicutes;Clostridia;Clostridiales;Lachnospiraceae;Epulopiscium;	57	0	10	0	0	0	0	0	0	0	0	0	0	0	0	0	0	0	0	0	20	0	0	0	23	0	0	0	4	0	0	0	0	0	0	0	0	0	0	0	0
Bacteria;Proteobacteria;Proteobacteria_unclassified;Proteobacteria_unclassified;Proteobacteria_unclassified;Proteobacteria_unclassified;	52	3	0	1	0	0	0	0	2	3	0	0	0	0	0	5	0	0	0	1	0	0	0	13	0	0	0	7	1	0	2	0	3	0	0	0	0	0	0	0	11
Bacteria;Firmicutes;Clostridia;Clostridiales;Lachnospiraceae;Anaerostipes;	47	0	0	0	0	0	0	2	0	0	6	0	0	2	0	0	0	3	2	12	0	0	1	0	0	0	1	0	0	5	0	4	1	0	1	0	0	0	0	0	7
Bacteria;Proteobacteria;Gammaproteobacteria;Enterobacteriales;Enterobacteriaceae;Raoultella;	46	0	0	0	0	0	0	0	0	0	0	0	0	0	10	0	0	0	0	0	0	0	0	0	35	0	1	0	0	0	0	0	0	0	0	0	0	0	0	0	0
Bacteria;Proteobacteria;Gammaproteobacteria;Enterobacteriales;Enterobacteriaceae;Klebsiella;	44	0	0	0	0	0	40	0	0	0	0	0	0	0	0	0	0	0	0	0	0	0	0	2	0	0	0	0	0	0	0	0	2	0	0	0	0	0	0	0	0
Bacteria;Firmicutes;Bacilli;Bacillales;Bacillales_unclassified;Bacillales_unclassified;	41	0	2	1	2	0	6	1	0	0	1	0	0	0	10	1	0	3	0	0	0	0	0	0	4	0	0	1	2	0	0	0	3	0	1	0	0	1	1	1	0
Bacteria;Firmicutes;Negativicutes;Selenomonadales;Veillonellaceae;Selenomonas_3;	34	0	0	0	0	0	0	0	0	0	28	0	0	0	0	0	0	0	0	0	0	0	0	0	0	0	0	0	0	1	0	4	0	0	0	0	0	1	0	0	0
Bacteria;Bacteroidetes;Bacteroidia;Bacteroidales;Prevotellaceae;Prevotella_6;	33	0	0	0	0	0	0	0	0	0	0	0	0	0	0	0	0	0	0	0	0	0	0	0	31	0	0	0	0	0	0	0	0	1	0	1	0	0	0	0	0
Bacteria;Proteobacteria;Gammaproteobacteria;Pseudomonadales;Pseudomonadaceae;Pseudomonas;	33	0	0	0	0	0	0	0	3	0	0	0	1	0	0	7	0	0	2	0	0	15	0	4	0	0	0	0	0	0	0	0	1	0	0	0	0	0	0	0	0
Bacteria;Cyanobacteria;Cyanobacteria_unclassified;Cyanobacteria_unclassified;Cyanobacteria_unclassified;Cyanobacteria_unclassified;	32	0	0	0	0	0	0	0	0	0	0	0	5	0	0	0	0	0	18	0	0	0	0	0	0	0	0	2	0	0	0	0	6	0	1	0	0	0	0	0	0
Bacteria;Proteobacteria;Gammaproteobacteria;Gammaproteobacteria_unclassified;Gammaproteobacteria_unclassified;Gammaproteobacteria_unclassified;	32	0	0	1	0	0	1	0	2	0	0	0	0	0	0	26	0	0	0	0	0	0	0	0	0	0	0	0	0	0	1	0	0	0	0	0	0	0	0	1	0
Bacteria;Tenericutes;Mollicutes;Mollicutes_RF39;Mollicutes_RF39_fa;Mollicutes_RF39_ge;	31	0	6	4	0	0	0	0	0	3	0	0	0	0	0	0	0	0	16	0	0	0	0	0	2	0	0	0	0	0	0	0	0	0	0	0	0	0	0	0	0
Bacteria;Proteobacteria;Gammaproteobacteria;Enterobacteriales;Enterobacteriaceae;Kluyvera;	27	0	0	0	0	0	0	0	0	0	0	0	0	0	2	0	0	0	0	0	0	0	0	0	0	0	0	0	0	0	1	0	0	0	0	0	0	0	0	24	0
Bacteria;Firmicutes;Bacilli;Lactobacillales;Leuconostocaceae;Leuconostoc;	25	0	0	1	0	0	0	1	0	0	0	0	0	0	14	0	1	0	1	0	0	1	2	0	1	0	0	2	0	0	0	0	0	0	0	0	0	0	1	0	0
Bacteria;Firmicutes;Clostridia;Clostridiales;Peptococcaceae;Peptococcus;	25	0	0	0	0	2	0	0	0	0	0	11	1	0	5	3	0	0	0	0	0	0	0	0	0	3	0	0	0	0	0	0	0	0	0	0	0	0	0	0	0
Bacteria;Firmicutes;Clostridia;Clostridiales;Eubacteriaceae;Eubacteriaceae_unclassified;	25	0	0	0	0	3	0	0	0	0	0	0	0	0	0	0	0	13	0	7	0	0	0	0	0	0	0	0	2	0	0	0	0	0	0	0	0	0	0	0	0
Bacteria;Firmicutes;Clostridia;Clostridiales;Peptostreptococcaceae;Peptostreptococcus;	21	0	0	0	0	0	0	0	0	0	2	0	0	0	0	0	0	0	0	0	0	1	0	0	15	0	0	0	0	0	0	0	3	0	0	0	0	0	0	0	0
Bacteria;Actinobacteria;Actinobacteria;Corynebacteriales;Corynebacteriaceae;Corynebacterium_1;	20	0	0	0	0	0	0	0	0	0	2	0	0	1	0	0	0	0	0	0	0	1	0	0	0	0	0	15	0	0	0	0	0	0	0	1	0	0	0	0	0
Bacteria;Firmicutes;Bacilli;Lactobacillales;Leuconostocaceae;Weissella;	18	0	0	0	1	0	0	0	0	0	0	0	1	0	0	0	0	2	0	0	0	1	7	0	0	0	0	0	0	0	5	0	0	0	0	0	0	0	0	0	1
Bacteria;Proteobacteria;Gammaproteobacteria;Betaproteobacteriales;Burkholderiaceae;Comamonas;	18	0	0	0	0	0	0	0	18	0	0	0	0	0	0	0	0	0	0	0	0	0	0	0	0	0	0	0	0	0	0	0	0	0	0	0	0	0	0	0	0
Bacteria;Bacteroidetes;Bacteroidia;Flavobacteriales;Flavobacteriaceae;Flavobacterium;	17	2	0	1	0	0	1	7	1	0	0	0	0	0	0	0	0	0	0	0	0	0	0	0	1	0	0	0	0	1	1	2	0	0	0	0	0	0	0	0	0
Bacteria;Proteobacteria;Gammaproteobacteria;Enterobacteriales;Enterobacteriaceae;Morganella;	17	0	0	0	0	0	5	0	4	0	0	0	0	0	0	4	0	0	0	0	0	2	0	0	0	0	0	0	0	0	0	0	0	0	0	0	0	2	0	0	0
Bacteria;Actinobacteria;Actinobacteria_unclassified;Actinobacteria_unclassified;Actinobacteria_unclassified;Actinobacteria_unclassified;	17	0	0	0	0	0	0	0	0	0	0	0	0	0	1	0	0	0	0	0	0	0	0	11	1	0	0	0	0	0	0	0	2	0	1	1	0	0	0	0	0
Bacteria;Firmicutes;Clostridia;Clostridiales;Syntrophomonadaceae;Syntrophomonas;	16	0	0	7	0	0	0	0	6	0	0	0	0	0	0	0	0	0	0	0	0	0	0	0	0	0	2	1	0	0	0	0	0	0	0	0	0	0	0	0	0
Bacteria;Firmicutes;Clostridia;Clostridiales;Family_XI;Parvimonas;	14	0	0	0	0	0	0	0	0	0	1	0	0	1	0	3	0	0	1	0	0	4	0	0	3	0	0	1	0	0	0	0	0	0	0	0	0	0	0	0	0
Bacteria;Firmicutes;Erysipelotrichia;Erysipelotrichales;Erysipelotrichaceae;Solobacterium;	14	0	0	2	1	0	0	2	2	0	0	1	0	1	0	0	0	1	0	0	1	0	0	0	2	0	0	0	0	0	0	0	1	0	0	0	0	0	0	0	0
Bacteria;Firmicutes;Clostridia;Clostridiales;Clostridiaceae_1;Clostridium_sensu_stricto_13;	12	0	0	0	0	0	0	0	0	0	0	0	0	0	0	0	0	0	0	0	12	0	0	0	0	0	0	0	0	0	0	0	0	0	0	0	0	0	0	0	0
Bacteria;Tenericutes;Mollicutes;Anaeroplasmatales;Anaeroplasmataceae;Anaeroplasma;	12	0	4	0	0	0	0	0	7	0	0	0	0	0	0	0	0	0	0	0	0	0	1	0	0	0	0	0	0	0	0	0	0	0	0	0	0	0	0	0	0
Bacteria;Firmicutes;Bacilli;Bacillales;Staphylococcaceae;Staphylococcus;	11	0	0	0	0	0	0	0	0	0	0	0	0	0	0	1	0	0	0	0	0	0	0	0	0	0	0	10	0	0	0	0	0	0	0	0	0	0	0	0	0
Bacteria;Firmicutes;Clostridia;Clostridiales;Lachnospiraceae;Oribacterium;	11	0	0	2	0	0	0	1	0	0	2	0	0	2	0	1	0	0	0	0	0	1	0	0	1	0	0	0	1	0	0	0	0	0	0	0	0	0	0	0	0
Bacteria;Proteobacteria;Gammaproteobacteria;Betaproteobacteriales;Neisseriaceae;Neisseria;	11	1	0	0	0	0	2	0	0	0	0	0	0	0	0	0	0	4	0	0	0	1	0	0	0	0	0	0	0	3	0	0	0	0	0	0	0	0	0	0	0
Bacteria;Firmicutes;Clostridia;Clostridiales;Lachnospiraceae;Stomatobaculum;	10	0	0	0	0	0	0	5	0	0	0	0	0	0	0	0	0	1	0	1	0	2	0	0	0	0	0	0	0	0	0	1	0	0	0	0	0	0	0	0	0
Bacteria;Verrucomicrobia;Verrucomicrobiae;Verrucomicrobiales;Rubritaleaceae;Luteolibacter;	9	1	0	0	0	0	0	0	2	1	0	0	0	0	0	0	0	0	0	0	0	0	0	0	0	0	0	0	0	3	2	0	0	0	0	0	0	0	0	0	0
Bacteria;Bacteroidetes;Bacteroidia;Bacteroidales;Rikenellaceae;Rikenellaceae_unclassified;	9	0	2	0	1	0	0	0	0	0	0	0	0	0	0	0	0	0	0	0	0	0	0	0	0	0	0	0	0	0	0	3	0	0	1	0	0	0	0	2	0
Bacteria;Proteobacteria;Alphaproteobacteria;Sphingomonadales;Sphingomonadaceae;Sphingomonadaceae_unclassified;	9	0	2	0	0	0	3	1	0	0	0	0	0	0	0	0	0	0	0	0	0	0	1	0	0	0	0	0	0	1	1	0	0	0	0	0	0	0	0	0	0
Bacteria;Actinobacteria;Actinobacteria;Actinobacteria_unclassified;Actinobacteria_unclassified;Actinobacteria_unclassified;	8	0	1	0	0	0	0	0	0	0	1	3	0	0	0	0	0	0	0	0	1	1	0	0	0	0	0	0	0	0	0	0	0	0	1	0	0	0	0	0	0
Bacteria;Firmicutes;Negativicutes;Selenomonadales;Selenomonadales_unclassified;Selenomonadales_unclassified;	8	0	0	1	0	0	0	0	0	0	0	0	0	0	0	0	0	0	0	0	0	0	0	0	0	0	0	0	0	0	0	0	0	0	0	3	0	0	0	4	0
Bacteria;Patescibacteria;Saccharimonadia;Saccharimonadales;Saccharimonadales_unclassified;Saccharimonadales_unclassified;	7	0	0	1	1	1	0	1	0	0	0	1	1	0	0	0	0	0	0	0	0	0	0	0	0	0	0	0	1	0	0	0	0	0	0	0	0	0	0	0	0
Bacteria;Planctomycetes;Planctomycetacia;Planctomycetacia_unclassified;Planctomycetacia_unclassified;Planctomycetacia_unclassified;	7	0	0	0	0	0	0	0	1	1	1	3	0	0	0	0	0	0	0	0	0	0	0	0	0	0	0	0	0	0	1	0	0	0	0	0	0	0	0	0	0
Bacteria;Firmicutes;Clostridia;Clostridiales;Lachnospiraceae;Coprococcus_3;	6	0	0	0	0	0	0	1	0	0	0	0	0	0	0	0	0	0	0	0	0	1	0	0	0	0	0	0	0	0	1	0	0	0	3	0	0	0	0	0	0
Bacteria;Firmicutes;Clostridia;Clostridiales;Lachnospiraceae;Lachnospiraceae_FCS020_group;	6	1	0	0	0	1	0	0	0	0	0	0	0	0	0	0	0	1	0	0	0	0	0	0	0	0	0	0	0	0	0	0	0	0	1	1	0	0	0	1	0
Bacteria;Proteobacteria;Gammaproteobacteria;Enterobacteriales;Enterobacteriaceae;Providencia;	6	0	0	0	0	2	0	0	0	0	0	0	3	0	0	0	0	0	0	0	0	0	0	0	0	0	0	0	0	0	0	1	0	0	0	0	0	0	0	0	0
Bacteria;Proteobacteria;Gammaproteobacteria;Pseudomonadales;Moraxellaceae;Acinetobacter;	6	0	0	0	0	0	0	0	2	0	0	0	0	0	0	0	0	0	0	0	0	0	0	0	0	0	0	4	0	0	0	0	0	0	0	0	0	0	0	0	0
Bacteria;Firmicutes;Clostridia;Clostridiales;Family_XI;Finegoldia;	5	0	0	0	0	0	0	0	0	0	0	0	0	2	0	0	0	0	0	0	0	0	0	0	3	0	0	0	0	0	0	0	0	0	0	0	0	0	0	0	0
Bacteria;Nitrospirae;Nitrospira;Nitrospirales;Nitrospiraceae;Nitrospira;	5	0	1	1	0	0	0	0	0	1	0	2	0	0	0	0	0	0	0	0	0	0	0	0	0	0	0	0	0	0	0	0	0	0	0	0	0	0	0	0	0
Bacteria;Proteobacteria;Gammaproteobacteria;Betaproteobacteriales;Nitrosomonadaceae;Ellin6067;	5	0	0	0	1	0	1	0	1	0	0	0	0	0	0	0	0	0	0	0	0	0	0	0	1	0	0	0	0	1	0	0	0	0	0	0	0	0	0	0	0
Bacteria;Proteobacteria;Gammaproteobacteria;Betaproteobacteriales;Neisseriaceae;Neisseriaceae_unclassified;	5	0	0	0	0	0	0	0	0	0	0	0	0	0	0	0	0	0	0	0	0	4	0	0	0	0	0	0	0	0	0	0	1	0	0	0	0	0	0	0	0
Bacteria;Actinobacteria;Actinobacteria;Bifidobacteriales;Bifidobacteriaceae;Scardovia;	4	0	0	0	0	0	0	0	0	1	0	0	0	0	0	0	0	0	0	0	0	0	0	0	0	0	1	0	0	0	0	0	0	2	0	0	0	0	0	0	0
Bacteria;Firmicutes;Clostridia;Clostridiales;Family_XI;Peptoniphilus;	4	0	0	0	0	0	0	0	0	0	0	0	0	0	2	0	0	0	0	0	0	0	0	0	1	0	0	0	1	0	0	0	0	0	0	0	0	0	0	0	0
Bacteria;Proteobacteria;Gammaproteobacteria;Enterobacteriales;Enterobacteriaceae;Hafnia-Obesumbacterium;	4	0	0	0	0	0	0	0	0	0	0	0	0	0	0	0	0	0	0	0	0	0	0	0	0	0	0	0	0	0	0	0	4	0	0	0	0	0	0	0	0
Bacteria;Bacteroidetes;Bacteroidia;Chitinophagales;Chitinophagaceae;Chitinophagaceae_unclassified;	4	0	0	0	0	0	1	0	0	0	1	0	0	0	0	0	0	0	0	0	0	0	0	0	1	0	0	0	0	1	0	0	0	0	0	0	0	0	0	0	0
Bacteria;Firmicutes;Clostridia;Clostridiales;Family_XI;Family_XI_unclassified;	4	0	0	0	0	0	0	0	0	0	0	0	0	0	0	0	0	0	0	0	0	1	0	0	2	0	0	0	0	0	0	0	0	0	0	0	0	0	0	0	1
Bacteria;Gemmatimonadetes;Gemmatimonadetes;Gemmatimonadales;Gemmatimonadaceae;uncultured;	4	0	0	0	0	0	0	0	1	1	1	0	0	0	0	0	0	0	0	0	0	0	0	0	0	0	0	0	0	0	0	1	0	0	0	0	0	0	0	0	0
Bacteria;Actinobacteria;Coriobacteriia;Coriobacteriales;Atopobiaceae;Olsenella;	3	0	0	0	1	0	0	0	0	0	1	0	0	0	0	0	0	0	0	0	1	0	0	0	0	0	0	0	0	0	0	0	0	0	0	0	0	0	0	0	0
Bacteria;Bacteroidetes;Bacteroidia;Cytophagales;Spirosomaceae;Arcicella;	3	0	0	0	0	0	0	0	0	2	0	0	0	0	0	0	0	0	0	0	0	0	0	0	0	0	0	0	0	0	1	0	0	0	0	0	0	0	0	0	0
Bacteria;Bacteroidetes;Bacteroidia;Sphingobacteriales;env.OPS_17;env.OPS_17_ge;	3	0	0	0	0	0	0	0	1	0	0	0	0	0	0	0	0	0	2	0	0	0	0	0	0	0	0	0	0	0	0	0	0	0	0	0	0	0	0	0	0
Bacteria;Firmicutes;Clostridia;Clostridiales;Clostridiaceae_1;Clostridium_sensu_stricto_12;	3	0	0	0	0	0	0	0	0	0	1	0	1	0	0	0	0	0	0	0	0	0	0	0	0	0	0	0	0	0	0	1	0	0	0	0	0	0	0	0	0
Bacteria;Firmicutes;Clostridia;Clostridiales;Lachnospiraceae;Lachnoanaerobaculum;	3	0	0	0	0	0	0	1	0	0	0	0	0	2	0	0	0	0	0	0	0	0	0	0	0	0	0	0	0	0	0	0	0	0	0	0	0	0	0	0	0
Bacteria;Firmicutes;Clostridia;Clostridiales;Ruminococcaceae;Hydrogenoanaerobacterium;	3	0	0	0	0	2	0	0	0	0	0	0	0	0	0	0	1	0	0	0	0	0	0	0	0	0	0	0	0	0	0	0	0	0	0	0	0	0	0	0	0
Bacteria;Planctomycetes;Planctomycetacia;Pirellulales;Pirellulaceae;Pirellula;	3	1	0	0	0	0	0	0	1	0	0	0	0	0	0	0	0	0	0	0	0	0	1	0	0	0	0	0	0	0	0	0	0	0	0	0	0	0	0	0	0
Bacteria;Proteobacteria;Alphaproteobacteria;Caulobacterales;Caulobacteraceae;Brevundimonas;	3	0	0	0	0	0	0	3	0	0	0	0	0	0	0	0	0	0	0	0	0	0	0	0	0	0	0	0	0	0	0	0	0	0	0	0	0	0	0	0	0
Bacteria;Proteobacteria;Alphaproteobacteria;Sphingomonadales;Sphingomonadaceae;Novosphingobium;	3	0	0	0	1	0	0	0	0	0	0	0	0	0	0	0	0	0	0	0	1	0	0	0	0	0	0	0	0	1	0	0	0	0	0	0	0	0	0	0	0
Bacteria;Proteobacteria;Gammaproteobacteria;Xanthomonadales;Xanthomonadaceae;Arenimonas;	3	1	1	0	0	0	0	0	0	0	0	1	0	0	0	0	0	0	0	0	0	0	0	0	0	0	0	0	0	0	0	0	0	0	0	0	0	0	0	0	0
Bacteria;Acidobacteria;Acidobacteria_unclassified;Acidobacteria_unclassified;Acidobacteria_unclassified;Acidobacteria_unclassified;	3	0	0	0	0	0	0	0	0	1	0	2	0	0	0	0	0	0	0	0	0	0	0	0	0	0	0	0	0	0	0	0	0	0	0	0	0	0	0	0	0
Bacteria;Actinobacteria;Actinobacteria;Bifidobacteriales;Bifidobacteriaceae;Bifidobacteriaceae_unclassified;	3	0	0	0	2	0	0	0	0	0	0	0	0	0	0	0	0	0	0	0	0	0	0	0	0	0	0	0	0	0	0	0	0	0	1	0	0	0	0	0	0
Bacteria;Planctomycetes;Planctomycetacia;Gemmatales;Gemmataceae;Gemmataceae_unclassified;	3	0	0	0	0	0	0	0	0	1	0	0	0	0	0	0	0	0	0	0	0	0	0	0	0	0	0	0	0	1	1	0	0	0	0	0	0	0	0	0	0
Bacteria;Proteobacteria;Alphaproteobacteria;Rhodobacterales;Rhodobacteraceae;Rhodobacteraceae_unclassified;	3	0	0	0	0	1	0	0	0	0	1	0	0	0	0	0	0	0	0	0	0	0	0	0	0	0	0	0	0	0	1	0	0	0	0	0	0	0	0	0	0
Bacteria;Proteobacteria;Gammaproteobacteria;Xanthomonadales;Xanthomonadaceae;Xanthomonadaceae_unclassified;	3	1	0	0	0	0	0	0	2	0	0	0	0	0	0	0	0	0	0	0	0	0	0	0	0	0	0	0	0	0	0	0	0	0	0	0	0	0	0	0	0
Bacteria;Verrucomicrobia;Verrucomicrobiae;Opitutales;Puniceicoccaceae;Puniceicoccaceae_unclassified;	3	0	2	0	0	0	0	0	0	0	0	0	0	0	0	0	0	0	0	0	0	0	0	0	0	0	0	1	0	0	0	0	0	0	0	0	0	0	0	0	0
Bacteria;Actinobacteria;Actinobacteria;Micrococcales;Micrococcaceae;Arthrobacter;	2	0	0	0	0	0	1	0	0	0	0	0	0	0	0	0	0	0	0	0	0	0	0	0	0	0	0	0	0	0	0	0	1	0	0	0	0	0	0	0	0
Bacteria;Bacteroidetes;Bacteroidia;Bacteroidales;Porphyromonadaceae;Porphyromonas;	2	0	0	0	0	0	0	0	0	0	0	0	1	0	0	0	0	0	0	0	0	0	0	0	1	0	0	0	0	0	0	0	0	0	0	0	0	0	0	0	0
Bacteria;Firmicutes;Clostridia;Clostridiales;Lachnospiraceae;Herbinix;	2	0	0	0	0	0	0	0	1	0	0	0	0	0	0	0	0	0	0	1	0	0	0	0	0	0	0	0	0	0	0	0	0	0	0	0	0	0	0	0	0
Bacteria;Firmicutes;Negativicutes;Selenomonadales;Veillonellaceae;Selenomonas_4;	2	0	0	0	0	1	0	0	0	0	1	0	0	0	0	0	0	0	0	0	0	0	0	0	0	0	0	0	0	0	0	0	0	0	0	0	0	0	0	0	0
Bacteria;Patescibacteria;Gracilibacteria;JGI_0000069-P22;JGI_0000069-P22_fa;JGI_0000069-P22_ge;	2	0	0	0	0	0	0	0	2	0	0	0	0	0	0	0	0	0	0	0	0	0	0	0	0	0	0	0	0	0	0	0	0	0	0	0	0	0	0	0	0
Bacteria;Patescibacteria;Saccharimonadia;Saccharimonadales;Saccharimonadaceae;Candidatus_Saccharimonas;	2	0	0	0	0	0	0	0	1	0	1	0	0	0	0	0	0	0	0	0	0	0	0	0	0	0	0	0	0	0	0	0	0	0	0	0	0	0	0	0	0
Bacteria;Proteobacteria;Alphaproteobacteria;Rhizobiales;Beijerinckiaceae;Bosea;	2	0	0	0	0	0	0	2	0	0	0	0	0	0	0	0	0	0	0	0	0	0	0	0	0	0	0	0	0	0	0	0	0	0	0	0	0	0	0	0	0
Bacteria;Proteobacteria;Alphaproteobacteria;Rhizobiales;Devosiaceae;Devosia;	2	1	0	0	0	0	0	0	0	0	0	0	0	1	0	0	0	0	0	0	0	0	0	0	0	0	0	0	0	0	0	0	0	0	0	0	0	0	0	0	0
Bacteria;Proteobacteria;Alphaproteobacteria;Rhodobacterales;Rhodobacteraceae;Rhodobacter;	2	0	0	0	0	0	0	0	2	0	0	0	0	0	0	0	0	0	0	0	0	0	0	0	0	0	0	0	0	0	0	0	0	0	0	0	0	0	0	0	0
Bacteria;Proteobacteria;Gammaproteobacteria;Aeromonadales;Aeromonadaceae;Aeromonas;	2	0	0	0	0	0	0	0	2	0	0	0	0	0	0	0	0	0	0	0	0	0	0	0	0	0	0	0	0	0	0	0	0	0	0	0	0	0	0	0	0
Bacteria;Proteobacteria;Gammaproteobacteria;Betaproteobacteriales;Burkholderiaceae;Delftia;	2	0	0	0	0	1	0	0	0	0	0	0	0	0	0	0	0	0	0	0	0	0	0	0	0	0	0	0	0	0	1	0	0	0	0	0	0	0	0	0	0
Bacteria;Proteobacteria;Gammaproteobacteria;Betaproteobacteriales;Burkholderiaceae;Rhodoferax;	2	0	1	0	0	0	1	0	0	0	0	0	0	0	0	0	0	0	0	0	0	0	0	0	0	0	0	0	0	0	0	0	0	0	0	0	0	0	0	0	0
Bacteria;Proteobacteria;Gammaproteobacteria;Betaproteobacteriales;Methylophilaceae;Methylotenera;	2	1	0	0	0	0	0	0	0	0	0	0	0	0	0	0	0	0	0	0	0	0	0	0	0	0	0	0	0	0	0	1	0	0	0	0	0	0	0	0	0
Bacteria;Proteobacteria;Gammaproteobacteria;Betaproteobacteriales;Nitrosomonadaceae;MND1;	2	0	0	0	0	0	0	0	0	0	0	1	0	0	1	0	0	0	0	0	0	0	0	0	0	0	0	0	0	0	0	0	0	0	0	0	0	0	0	0	0
Bacteria;Proteobacteria;Gammaproteobacteria;Betaproteobacteriales;TRA3-20;TRA3-20_ge;	2	0	0	0	0	0	0	1	0	0	0	0	0	0	0	0	1	0	0	0	0	0	0	0	0	0	0	0	0	0	0	0	0	0	0	0	0	0	0	0	0
Bacteria;Proteobacteria;Gammaproteobacteria;Pseudomonadales;Moraxellaceae;Psychrobacter;	2	0	0	0	0	0	0	0	0	0	2	0	0	0	0	0	0	0	0	0	0	0	0	0	0	0	0	0	0	0	0	0	0	0	0	0	0	0	0	0	0
Bacteria;Bacteroidetes;Bacteroidia;Cytophagales;Microscillaceae;uncultured;	2	0	1	0	1	0	0	0	0	0	0	0	0	0	0	0	0	0	0	0	0	0	0	0	0	0	0	0	0	0	0	0	0	0	0	0	0	0	0	0	0
Bacteria;Planctomycetes;Planctomycetacia;Planctomycetales;uncultured;uncultured_ge;	2	0	0	0	0	0	0	0	0	0	0	0	0	0	0	0	0	0	0	0	0	0	0	0	1	0	0	0	0	0	1	0	0	0	0	0	0	0	0	0	0
Bacteria;Actinobacteria;Actinobacteria;Micrococcales;Micrococcales_unclassified;Micrococcales_unclassified;	2	0	0	0	0	0	0	0	0	0	1	0	0	0	0	0	0	0	0	0	1	0	0	0	0	0	0	0	0	0	0	0	0	0	0	0	0	0	0	0	0
Bacteria;Bacteroidetes;Bacteroidia;Bacteroidales;Marinifilaceae;Marinifilaceae_unclassified;	2	0	0	0	0	0	0	0	0	0	0	0	1	0	0	0	0	0	0	0	1	0	0	0	0	0	0	0	0	0	0	0	0	0	0	0	0	0	0	0	0
Bacteria;Firmicutes;Bacilli;Bacilli_unclassified;Bacilli_unclassified;Bacilli_unclassified;	2	0	0	0	0	0	0	0	0	0	0	0	0	0	2	0	0	0	0	0	0	0	0	0	0	0	0	0	0	0	0	0	0	0	0	0	0	0	0	0	0
Bacteria;Firmicutes;Bacilli;Lactobacillales;Enterococcaceae;Enterococcaceae_unclassified;	2	0	0	0	0	0	1	0	0	0	1	0	0	0	0	0	0	0	0	0	0	0	0	0	0	0	0	0	0	0	0	0	0	0	0	0	0	0	0	0	0
Bacteria;Patescibacteria;Parcubacteria;Parcubacteria_unclassified;Parcubacteria_unclassified;Parcubacteria_unclassified;	2	0	0	0	0	0	0	0	0	0	0	0	0	0	0	0	0	0	0	0	0	0	0	0	2	0	0	0	0	0	0	0	0	0	0	0	0	0	0	0	0
Bacteria;Verrucomicrobia;Verrucomicrobiae;Pedosphaerales;Pedosphaeraceae;Pedosphaeraceae_unclassified;	2	0	1	0	0	0	0	0	0	0	0	0	0	0	0	0	0	0	0	0	0	0	0	0	1	0	0	0	0	0	0	0	0	0	0	0	0	0	0	0	0
Bacteria;Acidobacteria;Blastocatellia_(Subgroup_4);Blastocatellales;Blastocatellaceae;Blastocatellaceae_unclassified;	1	0	0	0	0	0	0	0	0	0	1	0	0	0	0	0	0	0	0	0	0	0	0	0	0	0	0	0	0	0	0	0	0	0	0	0	0	0	0	0	0
Bacteria;Acidobacteria;Subgroup_6;Subgroup_6_unclassified;Subgroup_6_unclassified;Subgroup_6_unclassified;	1	1	0	0	0	0	0	0	0	0	0	0	0	0	0	0	0	0	0	0	0	0	0	0	0	0	0	0	0	0	0	0	0	0	0	0	0	0	0	0	0
Bacteria;Acidobacteria;Subgroup_6;Unknown_Order;Unknown_Family;Unknown_Family_unclassified;	1	0	0	0	0	0	0	0	0	0	0	0	0	0	0	0	0	0	0	0	0	0	0	0	0	0	0	0	0	1	0	0	0	0	0	0	0	0	0	0	0
Bacteria;Actinobacteria;Acidimicrobiia;Acidimicrobiia_unclassified;Acidimicrobiia_unclassified;Acidimicrobiia_unclassified;	1	0	0	0	0	0	0	0	0	0	0	0	0	0	0	0	0	0	0	0	0	0	0	0	0	0	0	0	0	0	1	0	0	0	0	0	0	0	0	0	0
Bacteria;Actinobacteria;Actinobacteria;Micrococcales;Microbacteriaceae;Microbacteriaceae_unclassified;	1	0	0	0	0	0	0	0	0	0	0	0	1	0	0	0	0	0	0	0	0	0	0	0	0	0	0	0	0	0	0	0	0	0	0	0	0	0	0	0	0
Bacteria;Bacteroidetes;Bacteroidia;Bacteroidales;Prevotellaceae;uncultured;	1	0	0	0	0	0	0	0	0	0	0	0	0	0	0	0	0	0	0	0	0	0	0	0	0	0	0	0	0	0	0	0	0	0	0	1	0	0	0	0	0
Bacteria;Cyanobacteria;Oxyphotobacteria;Oxyphotobacteria_unclassified;Oxyphotobacteria_unclassified;Oxyphotobacteria_unclassified;	1	0	0	0	0	0	0	0	0	0	0	0	0	0	0	0	0	0	0	0	0	0	0	0	0	0	0	1	0	0	0	0	0	0	0	0	0	0	0	0	0
Bacteria;Firmicutes;Negativicutes;Selenomonadales;Acidaminococcaceae;uncultured;	1	0	0	0	0	0	0	0	0	0	0	0	0	0	0	0	0	0	0	0	0	0	0	0	0	0	0	0	0	0	0	0	0	0	0	1	0	0	0	0	0
Bacteria;Planctomycetes;Planctomycetes_unclassified;Planctomycetes_unclassified;Planctomycetes_unclassified;Planctomycetes_unclassified;	1	0	1	0	0	0	0	0	0	0	0	0	0	0	0	0	0	0	0	0	0	0	0	0	0	0	0	0	0	0	0	0	0	0	0	0	0	0	0	0	0
Bacteria;Proteobacteria;Alphaproteobacteria;Rhizobiales;Beijerinckiaceae;Beijerinckiaceae_unclassified;	1	0	0	0	0	0	0	0	0	0	0	0	0	0	0	0	0	0	0	0	0	0	0	0	0	0	0	0	0	0	0	1	0	0	0	0	0	0	0	0	0
Bacteria;Proteobacteria;Alphaproteobacteria;Rhizobiales;Rhizobiales_Incertae_Sedis;uncultured;	1	0	0	0	0	0	0	0	0	0	0	0	0	0	0	0	0	1	0	0	0	0	0	0	0	0	0	0	0	0	0	0	0	0	0	0	0	0	0	0	0
Bacteria;Proteobacteria;Alphaproteobacteria;Rhizobiales;Rhizobiales_unclassified;Rhizobiales_unclassified;	1	0	0	0	0	0	0	0	0	0	0	0	0	0	0	0	0	0	0	0	0	0	0	0	0	0	0	0	0	1	0	0	0	0	0	0	0	0	0	0	0
Bacteria;Proteobacteria;Alphaproteobacteria;Rhizobiales;Xanthobacteraceae;Xanthobacteraceae_unclassified;	1	0	0	0	1	0	0	0	0	0	0	0	0	0	0	0	0	0	0	0	0	0	0	0	0	0	0	0	0	0	0	0	0	0	0	0	0	0	0	0	0
Bacteria;Proteobacteria;Alphaproteobacteria;Rhizobiales;Xanthobacteraceae;uncultured;	1	0	0	0	0	0	0	0	1	0	0	0	0	0	0	0	0	0	0	0	0	0	0	0	0	0	0	0	0	0	0	0	0	0	0	0	0	0	0	0	0
Bacteria;Proteobacteria;Alphaproteobacteria;Sneathiellales;Sneathiellaceae;uncultured;	1	0	0	0	0	0	0	1	0	0	0	0	0	0	0	0	0	0	0	0	0	0	0	0	0	0	0	0	0	0	0	0	0	0	0	0	0	0	0	0	0
Bacteria;Proteobacteria;Deltaproteobacteria;Deltaproteobacteria_unclassified;Deltaproteobacteria_unclassified;Deltaproteobacteria_unclassified;	1	0	0	0	0	0	0	0	1	0	0	0	0	0	0	0	0	0	0	0	0	0	0	0	0	0	0	0	0	0	0	0	0	0	0	0	0	0	0	0	0
Bacteria;Proteobacteria;Deltaproteobacteria;Desulfarculales;Desulfarculaceae;uncultured;	1	0	0	0	1	0	0	0	0	0	0	0	0	0	0	0	0	0	0	0	0	0	0	0	0	0	0	0	0	0	0	0	0	0	0	0	0	0	0	0	0
Bacteria;Proteobacteria;Deltaproteobacteria;Desulfovibrionales;Desulfovibrionales_unclassified;Desulfovibrionales_unclassified;	1	0	0	0	0	0	0	0	0	0	0	0	1	0	0	0	0	0	0	0	0	0	0	0	0	0	0	0	0	0	0	0	0	0	0	0	0	0	0	0	0
Bacteria;Proteobacteria;Deltaproteobacteria;Myxococcales;Myxococcales_unclassified;Myxococcales_unclassified;	1	0	0	0	0	0	0	0	0	0	0	1	0	0	0	0	0	0	0	0	0	0	0	0	0	0	0	0	0	0	0	0	0	0	0	0	0	0	0	0	0
Bacteria;Proteobacteria;Gammaproteobacteria;Xanthomonadales;Xanthomonadales_unclassified;Xanthomonadales_unclassified;	1	0	0	0	0	0	0	0	0	0	0	0	0	0	0	0	0	0	0	0	0	0	0	0	0	0	1	0	0	0	0	0	0	0	0	0	0	0	0	0	0
unknown;unknown_unclassified;unknown_unclassified;unknown_unclassified;unknown_unclassified;unknown_unclassified;	1	0	0	0	0	0	0	0	0	0	0	0	0	0	0	0	0	0	0	0	0	0	0	0	0	0	0	0	0	0	0	0	0	0	0	0	0	0	0	1	0
Bacteria;Acidobacteria;Acidobacteriia;Solibacterales;Solibacteraceae_(Subgroup_3);Bryobacter;	1	0	0	0	0	0	0	0	0	0	0	0	0	0	0	0	0	0	0	0	0	0	0	0	0	0	0	0	0	0	1	0	0	0	0	0	0	0	0	0	0
Bacteria;Acidobacteria;Blastocatellia_(Subgroup_4);Blastocatellales;Blastocatellaceae;JGI_0001001-H03;	1	0	0	0	0	0	1	0	0	0	0	0	0	0	0	0	0	0	0	0	0	0	0	0	0	0	0	0	0	0	0	0	0	0	0	0	0	0	0	0	0
Bacteria;Acidobacteria;Blastocatellia_(Subgroup_4);Pyrinomonadales;Pyrinomonadaceae;RB41;	1	0	0	0	0	0	0	0	0	0	0	0	0	0	0	0	0	0	1	0	0	0	0	0	0	0	0	0	0	0	0	0	0	0	0	0	0	0	0	0	0
Bacteria;Acidobacteria;Subgroup_5;Subgroup_5_or;Subgroup_5_fa;Subgroup_5_ge;	1	0	0	0	1	0	0	0	0	0	0	0	0	0	0	0	0	0	0	0	0	0	0	0	0	0	0	0	0	0	0	0	0	0	0	0	0	0	0	0	0
Bacteria;Acidobacteria;Subgroup_6;Subgroup_6_or;Subgroup_6_fa;Subgroup_6_ge;	1	0	0	0	0	0	0	0	0	0	0	0	0	0	0	0	0	0	0	0	0	0	0	0	0	0	0	0	0	0	0	1	0	0	0	0	0	0	0	0	0
Bacteria;Actinobacteria;Actinobacteria;Micrococcales;Cellulomonadaceae;Tropheryma;	1	0	0	0	0	0	0	0	0	0	0	0	0	0	0	0	0	0	0	0	0	0	0	0	0	0	1	0	0	0	0	0	0	0	0	0	0	0	0	0	0
Bacteria;Actinobacteria;Actinobacteria;Micrococcales;Intrasporangiaceae;Tetrasphaera;	1	0	0	0	0	0	0	0	1	0	0	0	0	0	0	0	0	0	0	0	0	0	0	0	0	0	0	0	0	0	0	0	0	0	0	0	0	0	0	0	0
Bacteria;Actinobacteria;Coriobacteriia;Coriobacteriales;Atopobiaceae;Atopobium;	1	0	0	0	0	0	0	0	0	0	0	0	0	0	0	0	0	0	0	0	0	0	0	0	1	0	0	0	0	0	0	0	0	0	0	0	0	0	0	0	0
Bacteria;Bacteroidetes;Bacteroidia;Bacteroidales;Prevotellaceae;Prevotella_1;	1	0	0	0	0	0	0	0	0	0	0	0	0	0	0	0	0	0	0	0	1	0	0	0	0	0	0	0	0	0	0	0	0	0	0	0	0	0	0	0	0
Bacteria;Bacteroidetes;Bacteroidia;Chitinophagales;Chitinophagaceae;Ferruginibacter;	1	0	0	0	0	0	0	0	0	0	0	0	0	0	0	0	0	0	0	0	0	0	0	0	0	0	0	0	0	1	0	0	0	0	0	0	0	0	0	0	0
Bacteria;Bacteroidetes;Bacteroidia;Cytophagales;Spirosomaceae;Emticicia;	1	0	0	0	0	0	0	0	1	0	0	0	0	0	0	0	0	0	0	0	0	0	0	0	0	0	0	0	0	0	0	0	0	0	0	0	0	0	0	0	0
Bacteria;Bacteroidetes;Bacteroidia;Flavobacteriales;Weeksellaceae;Chryseobacterium;	1	0	0	0	0	0	0	0	0	0	1	0	0	0	0	0	0	0	0	0	0	0	0	0	0	0	0	0	0	0	0	0	0	0	0	0	0	0	0	0	0
Bacteria;Bacteroidetes;Bacteroidia;Sphingobacteriales;Sphingobacteriaceae;Pedobacter;	1	0	0	0	0	0	0	0	0	0	0	0	0	0	0	0	0	0	0	0	0	0	0	0	0	0	0	0	0	0	0	1	0	0	0	0	0	0	0	0	0
Bacteria;Chloroflexi;Anaerolineae;Anaerolineales;Anaerolineaceae;Flexilinea;	1	0	0	0	0	0	0	0	0	0	0	0	0	0	0	0	0	0	0	0	0	0	0	0	0	0	0	0	1	0	0	0	0	0	0	0	0	0	0	0	0
Bacteria;Firmicutes;Bacilli;Lactobacillales;Carnobacteriaceae;Trichococcus;	1	0	0	0	0	0	0	1	0	0	0	0	0	0	0	0	0	0	0	0	0	0	0	0	0	0	0	0	0	0	0	0	0	0	0	0	0	0	0	0	0
Bacteria;Firmicutes;Bacilli;Lactobacillales;Lactobacillaceae;Pediococcus;	1	0	0	0	0	0	0	0	0	0	0	0	0	0	0	0	0	0	0	0	0	0	0	1	0	0	0	0	0	0	0	0	0	0	0	0	0	0	0	0	0
Bacteria;Firmicutes;Clostridia;Clostridiales;Family_XI;Anaerococcus;	1	0	0	0	0	0	0	0	0	0	0	0	0	0	0	0	0	0	0	0	0	0	0	0	1	0	0	0	0	0	0	0	0	0	0	0	0	0	0	0	0
Bacteria;Firmicutes;Clostridia;Clostridiales;Lachnospiraceae;Cellulosilyticum;	1	0	0	0	0	0	0	0	0	1	0	0	0	0	0	0	0	0	0	0	0	0	0	0	0	0	0	0	0	0	0	0	0	0	0	0	0	0	0	0	0
Bacteria;Firmicutes;Clostridia;Clostridiales;Lachnospiraceae;FD2005;	1	0	0	0	0	0	0	0	0	0	0	0	0	0	1	0	0	0	0	0	0	0	0	0	0	0	0	0	0	0	0	0	0	0	0	0	0	0	0	0	0
Bacteria;Firmicutes;Clostridia;Clostridiales;Lachnospiraceae;Lachnospiraceae_NK4A136_group;	1	0	0	0	0	0	0	0	0	0	0	0	0	0	0	0	0	0	0	0	0	0	0	0	0	0	0	1	0	0	0	0	0	0	0	0	0	0	0	0	0
Bacteria;Firmicutes;Clostridia;Clostridiales;Peptostreptococcaceae;Clostridioides;	1	0	0	0	0	0	0	0	0	0	0	0	0	0	0	0	0	0	0	0	0	0	0	0	1	0	0	0	0	0	0	0	0	0	0	0	0	0	0	0	0
Bacteria;Firmicutes;Clostridia;Clostridiales;Peptostreptococcaceae;Paraclostridium;	1	0	0	0	0	0	0	0	0	1	0	0	0	0	0	0	0	0	0	0	0	0	0	0	0	0	0	0	0	0	0	0	0	0	0	0	0	0	0	0	0
Bacteria;Omnitrophicaeota;Omnitrophicaeota_cl;Omnitrophicaeota_or;Omnitrophicaeota_fa;Omnitrophicaeota_ge;	1	0	0	0	1	0	0	0	0	0	0	0	0	0	0	0	0	0	0	0	0	0	0	0	0	0	0	0	0	0	0	0	0	0	0	0	0	0	0	0	0
Bacteria;Planctomycetes;Phycisphaerae;Tepidisphaerales;WD2101_soil_group;WD2101_soil_group_ge;	1	0	0	0	0	0	0	1	0	0	0	0	0	0	0	0	0	0	0	0	0	0	0	0	0	0	0	0	0	0	0	0	0	0	0	0	0	0	0	0	0
Bacteria;Proteobacteria;Alphaproteobacteria;Rhizobiales;Hyphomicrobiaceae;Hyphomicrobium;	1	0	0	0	0	0	0	0	0	0	0	0	0	0	0	0	0	0	0	0	0	0	0	0	0	0	0	1	0	0	0	0	0	0	0	0	0	0	0	0	0
Bacteria;Proteobacteria;Alphaproteobacteria;Sphingomonadales;Sphingomonadaceae;Sphingopyxis;	1	0	0	0	0	0	0	1	0	0	0	0	0	0	0	0	0	0	0	0	0	0	0	0	0	0	0	0	0	0	0	0	0	0	0	0	0	0	0	0	0
Bacteria;Proteobacteria;Deltaproteobacteria;RCP2-54;RCP2-54_fa;RCP2-54_ge;	1	1	0	0	0	0	0	0	0	0	0	0	0	0	0	0	0	0	0	0	0	0	0	0	0	0	0	0	0	0	0	0	0	0	0	0	0	0	0	0	0
Bacteria;Proteobacteria;Gammaproteobacteria;Betaproteobacteriales;Burkholderiaceae;Aquabacterium;	1	0	0	0	0	0	0	0	0	0	0	0	0	0	0	0	0	0	0	0	0	0	1	0	0	0	0	0	0	0	0	0	0	0	0	0	0	0	0	0	0
Bacteria;Proteobacteria;Gammaproteobacteria;Betaproteobacteriales;Burkholderiaceae;Diaphorobacter;	1	0	0	0	0	0	0	0	1	0	0	0	0	0	0	0	0	0	0	0	0	0	0	0	0	0	0	0	0	0	0	0	0	0	0	0	0	0	0	0	0
Bacteria;Proteobacteria;Gammaproteobacteria;Betaproteobacteriales;Burkholderiaceae;Massilia;	1	0	0	0	0	0	0	1	0	0	0	0	0	0	0	0	0	0	0	0	0	0	0	0	0	0	0	0	0	0	0	0	0	0	0	0	0	0	0	0	0
Bacteria;Proteobacteria;Gammaproteobacteria;Betaproteobacteriales;Nitrosomonadaceae;IS-44;	1	0	0	0	0	0	0	0	0	0	0	1	0	0	0	0	0	0	0	0	0	0	0	0	0	0	0	0	0	0	0	0	0	0	0	0	0	0	0	0	0
Bacteria;Proteobacteria;Gammaproteobacteria;Betaproteobacteriales;Nitrosomonadaceae;Nitrosospira;	1	0	0	0	0	0	0	0	0	0	1	0	0	0	0	0	0	0	0	0	0	0	0	0	0	0	0	0	0	0	0	0	0	0	0	0	0	0	0	0	0
Bacteria;Proteobacteria;Gammaproteobacteria;Betaproteobacteriales;SC-I-84;SC-I-84_ge;	1	0	0	0	0	0	0	0	0	0	0	0	0	1	0	0	0	0	0	0	0	0	0	0	0	0	0	0	0	0	0	0	0	0	0	0	0	0	0	0	0
Bacteria;Proteobacteria;Gammaproteobacteria;Enterobacteriales;Enterobacteriaceae;Citrobacter;	1	0	0	0	0	0	0	0	0	0	0	0	0	0	0	0	0	0	0	0	0	0	0	0	1	0	0	0	0	0	0	0	0	0	0	0	0	0	0	0	0
Bacteria;Proteobacteria;Gammaproteobacteria;Enterobacteriales;Enterobacteriaceae;Enterobacter;	1	0	0	0	0	0	0	0	0	0	1	0	0	0	0	0	0	0	0	0	0	0	0	0	0	0	0	0	0	0	0	0	0	0	0	0	0	0	0	0	0
Bacteria;Proteobacteria;Gammaproteobacteria;Oceanospirillales;Halomonadaceae;Cobetia;	1	0	1	0	0	0	0	0	0	0	0	0	0	0	0	0	0	0	0	0	0	0	0	0	0	0	0	0	0	0	0	0	0	0	0	0	0	0	0	0	0
Bacteria;Proteobacteria;Gammaproteobacteria;Pasteurellales;Pasteurellaceae;Aggregatibacter;	1	0	0	0	0	0	0	0	0	0	0	0	0	0	0	0	0	0	0	0	0	0	0	0	0	0	0	0	0	0	0	0	1	0	0	0	0	0	0	0	0
Bacteria;Proteobacteria;Gammaproteobacteria;Xanthomonadales;Xanthomonadaceae;Stenotrophomonas;	1	0	0	0	0	0	0	0	0	0	0	0	0	0	0	0	0	0	0	0	0	0	0	0	0	0	0	0	0	0	0	0	1	0	0	0	0	0	0	0	0
Bacteria;Synergistetes;Synergistia;Synergistales;Synergistaceae;Fretibacterium;	1	0	0	0	0	0	0	0	0	0	0	0	0	0	0	0	0	0	0	0	0	0	0	0	0	0	0	0	0	0	0	0	1	0	0	0	0	0	0	0	0
Bacteria;Verrucomicrobia;Verrucomicrobiae;Pedosphaerales;Pedosphaeraceae;Pedosphaeraceae_ge;	1	0	0	0	0	0	0	0	0	0	0	0	0	0	0	0	0	0	0	0	0	0	0	0	0	0	0	0	0	0	0	1	0	0	0	0	0	0	0	0	0

## Sheet: otus97-mothur_mac
taxonomy	total	A003	A014	A018	A036	A042	A056	A063	A070	A080	A081	A093	A131	A139	A140	A147	A157	A160	A167	A169	A174	A181	A190	A215	A224	A235	A239	A243	A244	A258	A260	A262	C023	C035	C059	C072	C089	C114	C145	C146	C209
Root	2812474	116840	99732	115750	144982	44386	72489	82418	116055	19870	88765	89045	50891	31503	47285	61646	24811	43872	75979	81116	116078	92851	84755	95661	86335	22537	106664	102215	63064	72106	29782	126742	122337	22290	52913	50598	27243	30712	25612	37114	37430
Bacteria;Bacteroidetes;Bacteroidia;Bacteroidales;Bacteroidaceae;Bacteroides;	608159	4702	3951	25009	41537	13319	2470	1311	6667	4290	43486	13806	13834	81	6300	9906	7384	14586	10837	30683	8783	27945	26456	8925	9389	3517	22163	23606	20535	33663	9998	55718	27991	833	5602	4862	14211	10533	12576	9962	16732
Bacteria;Firmicutes;Clostridia;Clostridiales;Lachnospiraceae;Lachnospiraceae_unclassified;	206941	4186	4280	4552	7352	3372	19	4894	7595	2233	10005	7161	3636	3746	5054	6286	1246	3275	8230	17495	3994	3509	4388	8365	6250	1011	6096	8131	3481	4129	1725	18632	8647	1025	5238	5971	2961	2426	1422	2275	2648
Bacteria;Bacteroidetes;Bacteroidia;Bacteroidales;Rikenellaceae;Alistipes;	169787	10413	725	17920	19631	6152	1	171	9095	905	3	6900	4865	16	1239	2486	1944	523	822	3432	9197	6703	6001	7090	4255	1309	12494	6000	3210	1	1608	6175	4993	2214	2943	2268	576	412	562	1480	3053
Bacteria;Firmicutes;Clostridia;Clostridiales;Ruminococcaceae;Faecalibacterium;	153806	6416	2714	2658	4601	3246	1	371	5058	2498	11	2547	3573	1392	3766	3435	642	3726	5144	2715	5912	9237	10524	6921	3942	2855	192	9741	3266	10176	2012	13631	7047	393	1683	6225	1425	0	1615	2495	0
Bacteria;Bacteroidetes;Bacteroidia;Bacteroidales;Bacteroidales_unclassified;Bacteroidales_unclassified;	151248	5802	3480	9704	8807	1060	168	500	27904	1396	19	6108	1572	23	1076	3575	2494	1000	941	8	8302	11555	4474	6859	5267	1024	2608	6622	1971	1996	309	4135	5729	1149	4222	1741	762	2192	1437	2198	1059
Bacteria;Firmicutes;Clostridia;Clostridiales;Ruminococcaceae;Ruminococcaceae_unclassified;	99488	2819	1524	2267	2919	1104	25	13758	3065	1005	232	11745	1490	162	1274	2994	549	602	1093	1523	5951	2812	1375	4161	9582	772	3268	3170	1188	705	951	1306	1680	4467	3621	808	382	1326	559	584	670
Bacteria;Bacteroidetes;Bacteroidia;Bacteroidales;Prevotellaceae;Prevotella_7;	85315	26380	28890	1	2	2	14	734	0	0	0	0	2	2	8290	2	0	1	0	1	8998	1	1	1895	3662	282	1	0	0	0	0	0	0	0	1	6152	0	1	0	0	0
Bacteria;Firmicutes;Clostridia;Clostridiales;Ruminococcaceae;Subdoligranulum;	67992	1933	723	4858	4	1259	0	3170	2093	36	1	3720	756	922	926	2088	887	898	2197	596	4299	2585	3068	732	2879	1185	3711	2626	1328	2958	304	2433	5245	1	2445	1155	501	489	710	594	1677
Bacteria;Firmicutes;Clostridia;Clostridiales;Ruminococcaceae;CAG-352;	63149	512	359	2723	4743	569	14	10336	642	235	959	2769	264	338	0	960	619	663	519	1886	2066	1198	396	3589	1752	443	13034	460	1838	4994	1360	0	845	208	512	229	0	424	157	534	0
Bacteria;Firmicutes;Clostridia;Clostridiales;Lachnospiraceae;uncultured;	58275	1831	325	952	1293	604	9	435	2672	1428	1813	1341	1725	1733	2301	1756	15	224	2583	4578	1066	338	2381	2353	1050	67	1638	6394	4424	168	571	830	2851	130	1056	1276	1927	222	719	255	941
Bacteria;Firmicutes;Clostridia;Clostridiales;Ruminococcaceae;Ruminococcaceae_ge;	55204	919	2068	2411	1221	574	17	20480	982	1	1332	9	236	1345	235	441	160	155	9097	939	4077	1191	1	378	776	117	1132	152	162	108	128	503	217	600	1480	327	76	387	24	701	45
Bacteria;Firmicutes;Clostridia;Clostridiales;Ruminococcaceae;Ruminococcus_1;	53311	188	1646	10823	2000	814	1	29	391	1	3389	800	360	1	355	2331	3210	933	2247	1482	2692	802	452	412	2087	114	635	2541	446	3	210	2	6182	211	1254	450	4	482	20	3214	97
Bacteria;Firmicutes;Clostridia;Clostridiales;Lachnospiraceae;Agathobacter;	51389	2948	1064	2	1	1521	0	333	526	306	2221	1065	2574	1718	286	616	1	5152	5575	1	1071	5145	398	537	513	85	4278	1856	2945	2	72	860	931	173	983	1873	124	1049	1267	1252	65
Bacteria;Firmicutes;Clostridia;Clostridiales;Lachnospiraceae;Blautia;	50394	1835	418	2347	2608	200	46	3821	440	296	1093	1240	475	4476	552	351	614	727	1332	413	2081	1839	1621	1209	1103	230	3462	1025	807	3700	494	3011	960	276	1056	778	637	1040	437	263	1081
Bacteria;Proteobacteria;Alphaproteobacteria;Alphaproteobacteria_unclassified;Alphaproteobacteria_unclassified;Alphaproteobacteria_unclassified;	50369	5914	720	407	0	0	0	8	3509	1636	0	285	658	10	829	3697	1	0	4	2090	1	0	160	7979	98	10	173	3465	1945	0	1226	0	12597	29	0	37	0	153	0	2	2726
Bacteria;Bacteria_unclassified;Bacteria_unclassified;Bacteria_unclassified;Bacteria_unclassified;Bacteria_unclassified;	48770	2800	3400	95	944	147	25444	4	456	107	156	76	363	0	737	857	13	2	25	4	3881	483	30	1578	75	10	229	1403	89	8	30	1	1825	47	1045	2236	20	17	4	39	90
Bacteria;Verrucomicrobia;Verrucomicrobiae;Verrucomicrobiales;Verrucomicrobiaceae;uncultured;	48105	672	14	107	6405	9	15791	0	1957	4	2	739	230	133	37	561	0	163	2383	175	569	2	2	29	1453	61	5808	6	826	42	32	3	4222	6	1858	6	1	3298	2	6	491
Bacteria;Firmicutes;Clostridia;Clostridiales;Ruminococcaceae;Ruminococcaceae_UCG-002;	42927	2223	717	2228	1521	1062	0	1010	3151	1	0	930	636	2	944	370	140	65	423	634	3550	2121	155	1989	5220	704	3361	349	1759	18	1403	707	1128	287	1368	1969	27	507	61	187	0
Bacteria;Bacteroidetes;Bacteroidia;Bacteroidales;Tannerellaceae;Parabacteroides;	38061	1341	92	1675	20	669	1172	52	134	582	0	1423	814	9	307	828	552	898	223	1497	805	1920	5295	1567	230	49	2868	1190	431	2296	745	3069	1892	81	216	190	0	400	284	1046	1199
Bacteria;Firmicutes;Clostridia;Clostridiales;Christensenellaceae;Christensenellaceae_R-7_group;	35341	778	464	2097	162	876	0	36	1158	40	0	634	2257	0	833	1866	34	6	3809	748	880	1244	3	538	5942	347	165	4576	381	0	8	77	4238	204	762	111	0	0	17	17	33
Bacteria;Bacteroidetes;Bacteroidia;Bacteroidales;Prevotellaceae;Prevotellaceae_unclassified;	34505	2228	1270	2	3	3	44	1219	8250	5	29	3	3	8	1386	732	0	2	1	2	8531	4	4	2400	385	234	3	1344	0	2	1	0	6	0	5063	1336	1	1	0	0	0
Bacteria;Firmicutes;Clostridia;Clostridiales;Ruminococcaceae;Ruminococcaceae_UCG-014;	34275	2737	2004	4069	75	14	2	980	2506	72	1	3400	286	3	475	1690	2	29	163	1	2311	41	1468	2434	3971	957	1815	1041	709	6	169	1	2	33	796	0	0	10	0	0	2
Bacteria;Firmicutes;Negativicutes;Selenomonadales;Acidaminococcaceae;Phascolarctobacterium;	33939	765	1909	1967	0	78	2818	82	0	462	1	8166	2079	0	0	73	7	1	1969	4999	496	25	0	260	1286	0	2	1	141	0	297	0	2317	258	1338	67	328	0	715	11	1021
Bacteria;Proteobacteria;Gammaproteobacteria;Betaproteobacteriales;Burkholderiaceae;Burkholderiaceae_unclassified;	31519	4580	1728	89	247	14	2	80	3136	481	1	0	1138	171	1086	23	0	1	166	67	865	2681	4115	2923	125	123	725	0	0	2	575	1	4975	64	186	0	0	945	11	193	0
Bacteria;Bacteroidetes;Bacteroidia;Bacteroidales;Tannerellaceae;Tannerellaceae_unclassified;	29914	4	3449	2140	8254	446	0	100	3017	0	0	0	759	19	95	325	312	1	334	0	1625	2	12	376	273	258	1560	0	1054	0	147	1	3181	158	431	199	1	923	0	458	0
Bacteria;Firmicutes;Clostridia;Clostridiales;Lachnospiraceae;Roseburia;	29291	630	281	355	286	151	0	245	893	64	2524	840	345	73	251	536	164	4107	1036	1117	192	185	639	216	321	295	512	1418	3310	1	1361	1332	1556	143	303	427	816	349	1621	363	33
Bacteria;Proteobacteria;Gammaproteobacteria;Betaproteobacteriales;Burkholderiaceae;Parasutterella;	27607	0	1	25	10999	590	3	0	0	0	0	2009	24	1	2	653	582	1705	477	0	75	0	661	5	11	1	0	631	608	962	0	4797	0	25	295	915	450	0	0	151	949
Bacteria;Firmicutes;Clostridia;Clostridiales;Ruminococcaceae;Ruminiclostridium_6;	23810	5375	697	113	1086	257	11	11	2428	0	191	785	807	1	263	0	0	470	53	0	158	0	0	5848	104	239	0	0	266	0	665	16	2634	529	66	16	0	2	2	4	713
Bacteria;Actinobacteria;Actinobacteria;Bifidobacteriales;Bifidobacteriaceae;Bifidobacterium;	22149	60	107	1121	437	581	11	1924	34	0	2441	1471	14	992	21	394	767	135	3762	0	1201	1798	110	12	848	0	1398	123	76	2	4	272	77	1778	104	0	0	1	0	38	35
Bacteria;Firmicutes;Erysipelotrichia;Erysipelotrichales;Erysipelotrichaceae;Erysipelotrichaceae_unclassified;	21555	133	95	769	164	26	0	6504	29	13	0	1319	408	3431	424	25	5	109	1332	902	26	285	426	195	354	59	1215	155	90	362	61	1297	344	54	158	177	536	24	8	41	0
Bacteria;Proteobacteria;Gammaproteobacteria;Enterobacteriales;Enterobacteriaceae;Escherichia-Shigella;	20830	1	1	152	115	15	1651	82	25	673	148	1378	1106	28	8	19	2	9	14	2	6322	224	0	24	169	34	17	200	1562	3626	1059	0	10	5	1	0	3	11	15	2114	5
Bacteria;Firmicutes;Clostridia;Clostridiales;Lachnospiraceae;Fusicatenibacter;	18076	342	96	318	2168	168	0	155	237	74	1085	357	278	621	85	539	0	538	1829	260	426	1379	1708	284	307	220	225	54	199	1	172	979	606	0	223	658	480	0	105	185	715
Bacteria;Firmicutes;Clostridia;Clostridiales;Lachnospiraceae;Lachnoclostridium;	17594	792	195	247	237	206	0	1979	249	139	846	107	106	3666	534	208	78	28	401	136	1370	816	91	102	457	89	417	82	163	804	127	501	320	330	262	195	83	80	22	838	291
Bacteria;Proteobacteria;Gammaproteobacteria;Enterobacteriales;Enterobacteriaceae;Enterobacteriaceae_unclassified;	17315	134	200	1	171	1	12057	1	21	4	204	5	9	0	534	7	0	16	0	0	17	1	1	512	335	1	12	105	4	13	537	1	562	0	1	0	0	0	1	1847	0
Bacteria;Firmicutes;Negativicutes;Selenomonadales;Veillonellaceae;Veillonella;	15920	27	3	8	8	367	2	41	74	50	12793	21	11	25	342	56	0	291	13	28	1	36	38	12	28	1	16	65	8	51	2	525	44	253	3	3	0	24	0	594	56
Bacteria;Firmicutes;Clostridia;Clostridiales;Ruminococcaceae;Ruminococcaceae_UCG-005;	15599	1198	793	317	170	702	12	67	1186	6	1	344	349	12	289	718	6	15	41	285	1381	155	38	1860	1425	289	27	571	269	31	452	152	517	158	1173	398	2	12	11	127	40
Bacteria;Firmicutes;Bacilli;Lactobacillales;Streptococcaceae;Streptococcus;	15212	69	91	72	26	22	8723	133	46	19	574	13	31	56	1856	587	10	312	466	77	23	196	35	9	61	9	40	572	5	23	50	29	31	229	4	23	11	42	2	572	63
Bacteria;Firmicutes;Negativicutes;Selenomonadales;Veillonellaceae;Dialister;	15066	1104	0	0	4757	104	73	0	253	0	179	0	0	0	410	0	3	0	0	0	0	492	117	262	3	715	5034	128	246	45	2	1022	1	2	0	0	0	109	4	1	0
Bacteria;Bacteroidetes;Bacteroidia;Bacteroidales;Prevotellaceae;Prevotellaceae_UCG-003;	13804	1535	426	0	1	224	0	40	3291	0	0	1	0	1	575	1078	299	1	1843	2	618	0	2188	1094	278	309	0	0	0	0	0	0	0	0	0	0	0	0	0	0	0
Bacteria;Firmicutes;Clostridia;Clostridiales;Lachnospiraceae;Lachnospiraceae_ge;	13755	178	295	526	717	57	0	1023	44	23	77	325	166	761	485	149	324	2	938	0	406	196	514	96	306	442	361	151	401	0	40	113	257	122	736	3117	31	138	44	25	169
Bacteria;Actinobacteria;Coriobacteriia;Coriobacteriales;Coriobacteriaceae;Collinsella;	13144	909	188	110	29	120	0	1471	75	3	0	87	0	1485	219	82	103	451	574	1	1397	531	242	87	2753	48	1102	136	133	0	11	49	229	205	172	15	0	8	57	62	0
Bacteria;Bacteroidetes;Bacteroidia;Bacteroidales;Marinifilaceae;Odoribacter;	12924	737	151	1236	1	175	0	66	955	0	0	1286	626	0	191	269	142	0	89	365	1097	741	651	271	319	154	263	1115	471	1	105	0	295	7	41	187	281	244	0	258	134
Bacteria;Firmicutes;Clostridia;Clostridiales;Ruminococcaceae;Ruminococcaceae_UCG-010;	11115	663	1575	880	25	28	0	8	1757	0	0	218	174	0	151	88	12	27	1	56	1219	0	0	467	363	91	0	2676	3	0	23	0	377	54	91	13	0	0	0	75	0
Bacteria;Firmicutes;Clostridia;Clostridiales;Ruminococcaceae;Oscillospira;	10679	276	389	91	155	9	0	4	807	107	1	514	191	7	657	101	11	398	177	28	92	266	1163	1081	67	111	7	780	390	0	56	676	568	244	593	183	86	148	106	81	58
Bacteria;Bacteroidetes;Bacteroidia;Bacteroidales;Rikenellaceae;Rikenellaceae_RC9_gut_group;	9883	0	7229	1	0	1	0	1	2526	0	0	0	0	0	0	0	0	0	0	0	0	0	0	4	7	114	0	0	0	0	0	0	0	0	0	0	0	0	0	0	0
Bacteria;Firmicutes;Clostridia;Clostridiales;Clostridiales_unclassified;Clostridiales_unclassified;	9668	1213	577	548	140	327	49	71	444	12	8	188	55	5	19	455	17	10	30	36	316	174	5	1730	429	41	127	672	31	2	12	5	745	811	150	90	3	2	19	51	49
Bacteria;Firmicutes;Clostridia;Clostridiales;Ruminococcaceae;Flavonifractor;	9292	291	74	332	595	75	1	126	129	62	1557	131	79	74	126	213	38	243	121	102	371	401	227	148	239	93	617	153	152	128	21	613	149	641	327	73	49	148	265	57	51
Bacteria;Firmicutes;Negativicutes;Selenomonadales;Acidaminococcaceae;Acidaminococcaceae_unclassified;	9237	0	1	0	0	320	0	101	0	0	0	0	0	108	2	2627	878	381	0	0	0	0	1845	0	0	0	0	0	0	0	0	0	0	250	0	1471	0	0	92	1161	0
Bacteria;Firmicutes;Clostridia;Clostridiales;Lachnospiraceae;Butyrivibrio;	8826	0	5688	0	0	0	0	0	0	0	0	0	0	0	0	0	0	0	0	0	0	0	0	0	249	2889	0	0	0	0	0	0	0	0	0	0	0	0	0	0	0
Bacteria;Firmicutes;Clostridia;Clostridiales;Lachnospiraceae;Coprococcus_2;	8618	1100	579	1528	307	2	0	0	303	0	2	548	500	0	104	166	0	204	0	0	293	0	0	214	552	28	710	0	1	0	0	0	871	0	520	0	0	0	86	0	0
Bacteria;Proteobacteria;Deltaproteobacteria;Desulfovibrionales;Desulfovibrionaceae;Desulfovibrio;	8328	123	292	464	935	161	34	236	38	0	0	158	7	0	139	353	0	0	184	0	427	99	0	612	115	0	278	165	569	0	8	1	24	2448	46	372	0	0	0	22	18
Bacteria;Proteobacteria;Deltaproteobacteria;Desulfovibrionales;Desulfovibrionaceae;Bilophila;	7999	323	46	78	2526	28	120	6	377	40	0	0	54	9	120	258	110	112	23	335	237	67	483	134	49	3	246	125	224	222	209	0	193	39	401	219	183	148	129	70	53
Bacteria;Bacteroidetes;Bacteroidia;Bacteroidales;Prevotellaceae;Alloprevotella;	7727	1	5647	0	2	0	1	5	2	0	2	1	0	0	0	1	0	0	1	0	2	3	0	2028	2	0	4	1	0	1	2	2	8	4	0	1	1	0	0	4	1
Bacteria;Bacteroidetes;Bacteroidia;Bacteroidales;Muribaculaceae;Muribaculaceae_ge;	7526	2	100	417	4	4	0	1	6	3	2	1	3	10	1	1998	12	1	130	4	5	30	4	112	17	4	10	3379	0	8	5	10	12	33	48	2	1	1072	45	29	1
Bacteria;Firmicutes;Clostridia;Clostridiales;Christensenellaceae;Christensenellaceae_unclassified;	6711	203	50	1159	2	693	0	11	681	0	0	64	51	0	67	190	1	1	3	1	1932	50	0	260	769	224	30	87	1	0	2	0	2	3	145	2	0	0	8	12	7
Bacteria;Actinobacteria;Coriobacteriia;Coriobacteriales;Eggerthellaceae;Eggerthella;	6575	373	65	277	112	24	0	896	37	24	63	174	30	1575	134	64	47	33	62	90	219	49	108	192	859	45	121	42	70	86	7	170	29	153	177	82	14	40	7	14	11
Bacteria;Tenericutes;Mollicutes;Mollicutes_unclassified;Mollicutes_unclassified;Mollicutes_unclassified;	6123	8	2786	87	261	0	0	1	2414	0	0	1	0	0	16	3	1	2	0	0	0	1	0	534	2	0	0	1	0	1	0	1	1	0	0	0	0	1	0	0	1
Bacteria;Firmicutes;Clostridia;Clostridiales;Lachnospiraceae;Tyzzerella;	5522	139	28	80	13	10	0	11	44	12	0	334	19	14	176	228	2	108	236	786	70	82	342	471	39	101	280	352	175	95	104	17	280	40	108	168	121	339	3	12	83
Bacteria;Firmicutes;Firmicutes_unclassified;Firmicutes_unclassified;Firmicutes_unclassified;Firmicutes_unclassified;	5220	1469	73	856	170	442	4	16	654	6	0	22	16	3	8	126	10	22	7	5	551	12	25	57	29	3	16	161	4	5	3	0	60	111	66	173	1	2	15	10	7
Bacteria;Firmicutes;Clostridia;Clostridiales;Ruminococcaceae;Butyricicoccus;	5027	73	22	220	237	85	0	152	23	33	54	201	66	552	195	64	39	84	578	233	239	59	36	25	36	42	64	105	102	100	50	583	66	21	126	99	34	68	146	93	22
Bacteria;Firmicutes;Clostridia;Clostridiales;Peptostreptococcaceae;Peptostreptococcaceae_unclassified;	4768	249	431	19	97	37	10	111	140	169	105	3	86	2	19	55	8	63	27	61	114	186	0	6	821	6	154	114	52	0	3	1331	209	43	4	2	17	1	4	9	0
Bacteria;Firmicutes;Clostridia;Clostridiales;Ruminococcaceae;Ruminococcaceae_NK4A214_group;	4624	57	90	104	981	69	14	87	40	0	0	208	11	0	30	7	9	0	18	0	142	92	0	105	124	12	581	96	115	0	36	0	157	137	348	884	0	0	8	14	48
Bacteria;Cyanobacteria;Oxyphotobacteria;Chloroplast;Chloroplast_fa;Chloroplast_ge;	3528	2	9	2	1610	0	5	0	5	7	4	1	0	6	8	23	1	90	557	6	32	0	10	39	2	0	2	746	1	2	4	1	1	67	210	43	4	23	1	3	1
Bacteria;Firmicutes;Erysipelotrichia;Erysipelotrichales;Erysipelotrichaceae;Faecalitalea;	3205	750	218	29	37	1	5	1158	0	11	12	6	54	4	55	15	2	11	3	36	116	61	4	1	294	0	18	101	25	14	1	21	16	2	20	23	3	64	8	4	2
Bacteria;Firmicutes;Clostridia;Clostridiales;Clostridiaceae_1;Clostridiaceae_1_unclassified;	3095	299	687	26	4	14	11	69	40	105	10	0	91	0	1	21	0	14	1	4	72	67	21	5	355	6	15	277	38	0	14	634	0	148	8	1	28	0	2	7	0
Bacteria;Firmicutes;Negativicutes;Selenomonadales;Veillonellaceae;Veillonellaceae_unclassified;	2986	0	15	1	6	1	23	20	3	0	1	0	0	734	0	201	0	0	0	0	1945	3	0	3	2	0	1	0	0	4	0	0	22	0	0	0	0	0	0	1	0
Bacteria;Firmicutes;Clostridia;Clostridiales;Family_XIII;Family_XIII_ge;	2332	23	0	33	37	31	692	40	0	7	0	37	7	0	1	17	51	14	7	9	21	26	22	1	5	0	1042	3	1	5	5	0	4	119	21	6	0	3	9	1	32
Bacteria;Firmicutes;Clostridia;Clostridiales;Lachnospiraceae;Dorea;	2183	38	10	28	55	32	0	426	22	30	12	46	10	387	59	32	0	0	75	105	76	33	18	23	144	6	0	28	93	69	28	80	31	5	30	40	20	53	13	0	26
Bacteria;Firmicutes;Clostridia;Clostridiales;Lachnospiraceae;Coprococcus_1;	1978	85	34	254	0	38	0	206	37	0	0	106	23	111	20	22	0	0	120	0	67	113	24	41	162	3	71	14	25	96	27	39	114	0	39	64	0	18	0	5	0
Bacteria;Proteobacteria;Gammaproteobacteria;Pasteurellales;Pasteurellaceae;Pasteurellaceae_unclassified;	1688	72	1	0	0	0	0	0	269	8	472	23	36	1	67	141	0	59	12	0	4	160	2	4	3	0	1	15	8	55	3	67	168	3	1	0	1	0	1	26	5
Bacteria;Bacteroidetes;Bacteroidia;Bacteroidia_unclassified;Bacteroidia_unclassified;Bacteroidia_unclassified;	1538	2	8	45	24	174	0	0	406	2	0	9	3	0	0	131	0	0	1	0	1	140	2	157	0	0	19	2	5	0	1	39	122	3	99	47	2	1	0	90	3
Bacteria;Firmicutes;Clostridia;Clostridia_unclassified;Clostridia_unclassified;Clostridia_unclassified;	1452	351	43	204	110	83	0	0	72	0	0	45	19	0	9	49	0	0	0	0	187	0	0	29	36	0	0	49	31	0	0	0	2	27	67	0	0	0	0	16	23
Bacteria;Cyanobacteria;Melainabacteria;Melainabacteria_unclassified;Melainabacteria_unclassified;Melainabacteria_unclassified;	1440	1	762	0	0	0	0	0	0	0	0	1	2	0	0	0	0	0	0	0	0	0	1	495	0	0	3	1	0	0	1	0	173	0	0	0	0	0	0	0	0
Bacteria;Actinobacteria;Coriobacteriia;Coriobacteriales;Coriobacteriales_unclassified;Coriobacteriales_unclassified;	1425	9	5	125	0	45	0	64	20	1	0	42	12	0	37	92	20	0	258	7	100	0	0	16	79	8	1	184	20	0	0	0	118	88	50	14	0	10	0	0	0
Bacteria;Firmicutes;Clostridia;Clostridiales;Lachnospiraceae;Tyzzerella_3;	1377	0	0	0	131	0	0	11	0	0	0	0	0	374	0	15	0	0	155	0	0	0	97	0	0	0	47	0	38	253	89	0	76	0	91	0	0	0	0	0	0
Bacteria;Firmicutes;Clostridia;Clostridiales;Christensenellaceae;uncultured;	1374	13	13	1009	19	30	0	16	8	1	0	34	3	0	2	21	11	11	3	5	12	19	5	8	39	2	9	8	1	0	1	0	22	14	14	7	0	1	4	7	2
Bacteria;Firmicutes;Bacilli;Lactobacillales;Lactobacillaceae;Lactobacillus;	1292	0	6	26	15	565	67	6	14	0	4	8	7	2	9	15	11	25	5	0	63	5	2	40	9	4	26	312	8	4	5	11	6	3	0	3	2	2	0	2	0
Bacteria;Firmicutes;Clostridia;Clostridiales;Family_XIII;Family_XIII_unclassified;	1107	64	45	79	72	18	0	112	64	1	0	20	19	0	12	26	25	13	30	20	50	39	26	27	87	7	26	32	11	4	1	16	26	25	58	18	2	3	7	19	3
Bacteria;Firmicutes;Erysipelotrichia;Erysipelotrichales;Erysipelotrichaceae;Erysipelatoclostridium;	914	0	0	95	47	1	3	34	0	19	46	193	21	3	0	46	35	42	31	13	0	25	8	1	0	4	7	36	29	25	4	28	18	16	11	1	8	38	2	0	24
Bacteria;Firmicutes;Negativicutes;Selenomonadales;Veillonellaceae;Megasphaera;	911	0	0	0	0	119	476	48	3	0	112	0	0	2	4	0	0	4	2	0	0	1	0	3	2	0	0	0	0	0	0	1	1	0	0	0	0	0	133	0	0
Bacteria;Firmicutes;Clostridia;Clostridiales;Family_XIII;Anaerovorax;	901	7	124	2	0	0	0	374	50	0	0	8	0	0	3	0	2	0	0	0	0	14	0	68	150	8	1	37	0	0	1	0	2	1	7	34	0	0	1	7	0
Bacteria;Firmicutes;Erysipelotrichia;Erysipelotrichales;Erysipelotrichaceae;Turicibacter;	805	23	139	0	0	1	0	1	2	77	0	392	21	0	1	1	3	0	0	0	62	3	1	0	39	0	5	12	5	0	2	13	0	0	0	0	0	0	0	2	0
Bacteria;Verrucomicrobia;Verrucomicrobiae;Verrucomicrobiae_unclassified;Verrucomicrobiae_unclassified;Verrucomicrobiae_unclassified;	533	2	0	1	27	1	15	0	4	0	0	1	2	1	0	4	0	1	10	1	2	0	0	0	9	0	6	0	1	0	0	1	80	0	230	0	2	117	0	1	14
Bacteria;Firmicutes;Clostridia;Clostridiales;Peptostreptococcaceae;Terrisporobacter;	527	20	60	0	0	6	0	26	56	14	0	0	24	0	1	0	0	4	12	0	3	20	0	2	64	0	0	2	6	0	0	162	38	1	0	2	0	0	0	4	0
Bacteria;Proteobacteria;Deltaproteobacteria;Desulfovibrionales;Desulfovibrionaceae;Desulfovibrionaceae_unclassified;	527	0	0	80	1	0	20	0	0	0	0	0	78	0	30	51	0	0	2	0	0	2	0	38	0	0	0	1	0	0	0	0	24	5	7	1	0	69	0	116	2
Bacteria;Verrucomicrobia;Verrucomicrobiae;Opitutales;Puniceicoccaceae;Puniceicoccaceae_ge;	469	175	160	2	0	0	0	0	0	0	0	0	0	0	0	54	0	0	0	0	0	0	0	6	1	0	0	66	0	0	0	0	0	2	3	0	0	0	0	0	0
Bacteria;Firmicutes;Clostridia;Clostridiales;Family_XIII;Family_XIII_AD3011_group;	353	7	2	25	0	6	0	74	5	0	0	28	5	3	5	2	2	10	8	6	18	16	0	2	32	5	6	1	7	2	1	0	4	19	12	23	0	8	3	3	3
Bacteria;Firmicutes;Erysipelotrichia;Erysipelotrichales;Erysipelotrichaceae;Catenibacterium;	346	0	0	0	0	0	0	0	133	0	0	0	0	0	0	0	0	0	0	0	196	0	0	0	17	0	0	0	0	0	0	0	0	0	0	0	0	0	0	0	0
Bacteria;Synergistetes;Synergistia;Synergistales;Synergistaceae;Synergistaceae_unclassified;	316	5	0	0	187	0	0	6	0	1	0	0	0	0	1	3	0	0	1	0	0	0	0	25	61	0	0	0	0	0	0	0	0	0	24	0	0	0	0	2	0
Bacteria;Firmicutes;Bacilli;Lactobacillales;Enterococcaceae;Enterococcus;	303	1	0	0	22	0	115	0	0	0	4	0	10	0	23	0	50	1	0	0	0	12	9	0	0	1	2	15	38	0	0	0	0	0	0	0	0	0	0	0	0
Bacteria;Proteobacteria;Alphaproteobacteria;Rickettsiales;Mitochondria;Mitochondria_ge;	285	2	4	2	147	0	0	0	2	0	0	0	0	0	1	1	1	4	45	0	3	0	2	2	3	0	0	50	0	0	0	0	0	1	4	8	0	2	1	0	0
Bacteria;Proteobacteria;Gammaproteobacteria;Pasteurellales;Pasteurellaceae;Haemophilus;	246	0	0	0	0	0	0	0	62	4	13	1	0	0	5	0	0	0	0	0	0	0	0	0	0	0	0	0	0	0	0	0	158	1	1	0	0	0	0	0	1
Bacteria;Firmicutes;Clostridia;Clostridiales;Clostridiaceae_1;Clostridium_sensu_stricto_1;	245	16	22	0	0	6	64	0	0	12	0	0	8	0	1	0	0	0	0	0	6	14	0	1	41	0	1	3	3	0	0	1	0	0	0	0	0	0	0	46	0
Bacteria;Cyanobacteria;Melainabacteria;Gastranaerophilales;Gastranaerophilales_fa;Gastranaerophilales_ge;	222	0	1	0	0	0	0	0	0	0	0	0	197	0	0	0	0	0	18	0	0	0	0	0	0	0	0	0	0	0	1	0	5	0	0	0	0	0	0	0	0
Bacteria;Proteobacteria;Gammaproteobacteria;Enterobacteriales;Enterobacteriaceae;Proteus;	203	0	0	0	0	0	5	0	0	0	196	0	0	0	0	0	0	0	0	0	0	1	0	0	0	0	0	0	0	0	0	0	0	1	0	0	0	0	0	0	0
Bacteria;Fusobacteria;Fusobacteriia;Fusobacteriales;Fusobacteriaceae;Fusobacterium;	193	0	0	0	6	0	38	0	1	0	78	0	0	8	3	1	0	1	0	0	0	9	0	0	20	0	0	0	0	0	0	1	6	0	0	0	0	0	0	0	21
Bacteria;Proteobacteria;Gammaproteobacteria;Betaproteobacteriales;Betaproteobacteriales_unclassified;Betaproteobacteriales_unclassified;	170	7	2	2	1	0	0	0	8	0	0	0	4	0	3	0	0	0	0	0	3	4	1	0	0	0	34	1	0	0	4	0	71	0	0	0	0	25	0	0	0
Bacteria;Actinobacteria;Coriobacteriia;Coriobacteriales;Atopobiaceae;Atopobiaceae_unclassified;	168	0	0	0	1	0	0	37	1	0	2	0	0	0	2	3	88	1	0	0	10	0	0	1	6	0	0	8	0	0	0	2	1	0	1	0	0	3	0	1	0
Bacteria;Patescibacteria;Saccharimonadia;Saccharimonadales;Saccharimonadaceae;Saccharimonadaceae_ge;	156	1	1	2	20	1	0	24	25	0	0	8	7	13	0	2	0	2	3	2	2	5	0	8	5	0	0	0	6	3	0	0	8	0	3	2	0	2	0	0	1
Bacteria;Epsilonbacteraeota;Campylobacteria;Campylobacterales;Campylobacteraceae;Campylobacter;	142	2	0	0	0	0	0	0	1	0	111	0	1	0	0	0	0	1	0	1	0	5	0	0	1	0	0	0	5	3	0	4	4	0	0	0	0	0	0	3	0
Bacteria;Firmicutes;Clostridia;Clostridiales;Ruminococcaceae;uncultured;	132	94	0	0	33	0	0	0	0	0	0	0	0	0	0	5	0	0	0	0	0	0	0	0	0	0	0	0	0	0	0	0	0	0	0	0	0	0	0	0	0
Bacteria;Firmicutes;Clostridia;Clostridiales;Peptococcaceae;Peptococcaceae_unclassified;	120	11	0	10	56	1	1	1	1	0	2	0	0	0	0	0	0	2	0	0	7	0	0	1	0	2	0	2	0	0	0	0	0	1	0	20	0	0	0	2	0
Bacteria;Firmicutes;Clostridia;Clostridiales;Lachnospiraceae;Howardella;	118	0	21	0	0	0	0	0	0	0	0	0	0	0	0	0	0	0	0	0	0	0	0	0	85	0	0	12	0	0	0	0	0	0	0	0	0	0	0	0	0
Bacteria;Actinobacteria;Actinobacteria;Actinomycetales;Actinomycetaceae;Actinomyces;	100	1	1	4	2	0	0	31	0	1	1	9	0	5	4	3	0	6	1	0	1	9	0	4	6	0	2	0	2	0	0	0	0	5	0	0	0	0	0	2	0
Bacteria;Firmicutes;Bacilli;Lactobacillales;Lactobacillales_unclassified;Lactobacillales_unclassified;	86	1	1	4	1	0	1	3	1	0	11	0	0	2	11	7	0	13	3	0	2	5	0	0	3	0	1	2	0	0	0	7	1	0	1	0	2	0	1	0	2
Bacteria;Firmicutes;Bacilli;Lactobacillales;Streptococcaceae;Lactococcus;	81	0	0	1	0	0	22	14	0	0	1	0	5	0	0	3	0	0	0	0	9	1	4	3	0	0	1	9	0	0	0	0	7	0	0	0	0	1	0	0	0
Bacteria;Firmicutes;Clostridia;Clostridiales;Ruminococcaceae;Ruminococcaceae_UCG-008;	80	0	2	0	0	0	0	64	0	0	0	0	0	0	0	0	0	0	0	0	0	0	0	1	0	0	0	11	0	0	0	0	0	1	0	0	1	0	0	0	0
Bacteria;Firmicutes;Clostridia;Clostridiales;Lachnospiraceae;Lachnospiraceae_FCS020_group;	79	8	1	0	2	1	0	9	2	0	0	9	0	0	2	6	0	1	4	0	5	1	0	2	8	0	0	5	3	0	0	3	1	0	3	1	0	1	0	1	0
Bacteria;Firmicutes;Erysipelotrichia;Erysipelotrichales;Erysipelotrichaceae;Coprobacillus;	79	0	0	13	2	0	0	0	2	0	0	0	0	12	0	6	0	0	0	0	0	8	2	7	14	2	0	0	2	0	3	0	0	1	0	0	0	0	0	5	0
Bacteria;Actinobacteria;Actinobacteria;Micrococcales;Micrococcaceae;Rothia;	76	0	0	2	4	0	5	4	1	0	1	0	0	0	18	10	0	2	0	0	2	4	1	0	0	0	0	12	0	0	0	0	2	8	0	0	0	0	0	0	0
Bacteria;Verrucomicrobia;Verrucomicrobiae;Verrucomicrobiales;Verrucomicrobiales_unclassified;Verrucomicrobiales_unclassified;	75	0	0	1	2	0	3	0	2	0	0	0	0	0	0	0	0	0	2	0	0	0	0	0	2	0	2	0	1	0	0	0	16	0	34	0	0	10	0	0	0
Bacteria;Patescibacteria;Saccharimonadia;Saccharimonadales;Saccharimonadales_fa;Saccharimonadales_ge;	70	4	2	5	1	1	0	5	2	0	1	2	0	1	0	1	0	0	2	0	10	2	1	3	0	0	2	0	3	0	0	1	15	0	1	2	0	1	0	2	0
Bacteria;Proteobacteria;Gammaproteobacteria;Enterobacteriales;Enterobacteriaceae;Klebsiella;	65	0	0	0	0	0	61	0	0	0	0	0	0	0	0	0	0	0	0	0	0	0	0	2	0	0	0	0	0	0	0	0	2	0	0	0	0	0	0	0	0
Bacteria;Firmicutes;Clostridia;Clostridiales;Peptococcaceae;Peptococcus;	61	16	0	0	0	3	0	0	0	0	0	16	1	0	5	5	0	0	0	0	10	0	0	0	0	3	0	0	0	0	0	0	0	0	0	0	0	0	0	2	0
Bacteria;Firmicutes;Clostridia;Clostridiales;Lachnospiraceae;Epulopiscium;	57	0	10	0	0	0	0	0	0	0	0	0	0	0	0	0	0	0	0	0	20	0	0	0	23	0	0	0	4	0	0	0	0	0	0	0	0	0	0	0	0
Bacteria;Firmicutes;Clostridia;Clostridiales;Lachnospiraceae;Anaerostipes;	56	0	0	1	0	0	0	2	0	0	7	0	0	1	0	0	0	4	2	12	1	0	2	0	0	0	1	0	0	5	0	4	3	0	1	0	1	0	0	1	8
Bacteria;Proteobacteria;Gammaproteobacteria;Enterobacteriales;Enterobacteriaceae;Raoultella;	47	0	0	0	0	0	0	0	0	0	0	0	0	0	10	0	0	0	0	0	0	0	0	0	35	0	1	0	0	0	0	0	0	0	0	0	0	0	0	1	0
Bacteria;Proteobacteria;Proteobacteria_unclassified;Proteobacteria_unclassified;Proteobacteria_unclassified;Proteobacteria_unclassified;	45	3	3	2	0	1	0	0	1	0	0	0	4	0	0	2	0	0	0	0	0	0	0	6	0	0	0	4	0	0	1	0	5	0	0	0	0	1	0	0	12
Bacteria;Firmicutes;Bacilli;Bacillales;Bacillales_unclassified;Bacillales_unclassified;	41	0	2	1	2	0	6	1	0	0	1	0	0	0	10	1	0	3	0	0	0	0	0	0	4	0	0	1	2	0	0	0	3	0	1	0	0	1	1	1	0
Bacteria;Firmicutes;Negativicutes;Selenomonadales;Veillonellaceae;Selenomonas_3;	34	0	0	0	0	0	0	0	0	0	28	0	0	0	0	0	0	0	0	0	0	0	0	0	0	0	0	0	0	1	0	4	0	0	0	0	0	1	0	0	0
Bacteria;Bacteroidetes;Bacteroidia;Bacteroidales;Prevotellaceae;Prevotella_6;	33	0	0	0	0	0	0	0	0	0	0	0	0	0	0	0	0	0	0	0	0	0	0	0	31	0	0	0	0	0	0	0	0	1	0	1	0	0	0	0	0
Bacteria;Proteobacteria;Gammaproteobacteria;Gammaproteobacteria_unclassified;Gammaproteobacteria_unclassified;Gammaproteobacteria_unclassified;	33	0	0	0	0	0	1	0	2	0	0	0	0	0	0	26	0	0	0	0	0	0	0	0	0	0	0	0	0	0	1	0	2	0	0	0	0	0	0	1	0
Bacteria;Proteobacteria;Gammaproteobacteria;Pseudomonadales;Pseudomonadaceae;Pseudomonas;	33	0	0	0	0	0	0	0	3	0	0	0	1	0	0	7	0	0	2	0	0	15	0	4	0	0	0	0	0	0	0	0	1	0	0	0	0	0	0	0	0
Bacteria;Tenericutes;Mollicutes;Mollicutes_RF39;Mollicutes_RF39_fa;Mollicutes_RF39_ge;	30	0	6	5	0	0	0	0	0	3	0	0	0	0	0	0	0	0	16	0	0	0	0	0	0	0	0	0	0	0	0	0	0	0	0	0	0	0	0	0	0
Bacteria;Proteobacteria;Gammaproteobacteria;Enterobacteriales;Enterobacteriaceae;Kluyvera;	28	0	0	0	0	0	0	0	0	0	0	0	0	0	2	0	0	0	0	0	0	0	0	0	0	0	0	0	0	0	2	0	0	0	0	0	0	0	0	24	0
Bacteria;Firmicutes;Bacilli;Lactobacillales;Leuconostocaceae;Leuconostoc;	25	0	0	1	0	0	0	1	0	0	0	0	0	0	14	0	1	0	1	0	0	1	2	0	1	0	0	2	0	0	0	0	0	0	0	0	0	0	1	0	0
Bacteria;Firmicutes;Clostridia;Clostridiales;Eubacteriaceae;Eubacteriaceae_unclassified;	25	0	0	0	0	3	0	0	0	0	0	0	0	0	0	0	0	13	0	7	0	0	0	0	0	0	0	0	2	0	0	0	0	0	0	0	0	0	0	0	0
Bacteria;Firmicutes;Clostridia;Clostridiales;Peptostreptococcaceae;Peptostreptococcus;	21	0	0	0	0	0	0	0	0	0	2	0	0	0	0	0	0	0	0	0	0	1	0	0	15	0	0	0	0	0	0	0	3	0	0	0	0	0	0	0	0
Bacteria;Actinobacteria;Actinobacteria;Corynebacteriales;Corynebacteriaceae;Corynebacterium_1;	20	0	0	0	0	0	0	0	0	0	2	0	0	1	0	0	0	0	0	0	0	1	0	0	0	0	0	15	0	0	0	0	0	0	0	1	0	0	0	0	0
Bacteria;Actinobacteria;Actinobacteria_unclassified;Actinobacteria_unclassified;Actinobacteria_unclassified;Actinobacteria_unclassified;	19	0	0	0	0	0	0	0	0	0	0	0	0	0	0	0	0	0	0	0	0	0	0	11	4	0	0	0	0	0	0	0	2	1	1	0	0	0	0	0	0
Bacteria;Firmicutes;Bacilli;Lactobacillales;Leuconostocaceae;Weissella;	18	0	0	0	1	0	0	0	0	0	0	0	1	0	0	0	0	2	0	0	0	1	7	0	0	0	0	0	0	0	5	0	0	0	0	0	0	0	0	0	1
Bacteria;Proteobacteria;Gammaproteobacteria;Betaproteobacteriales;Burkholderiaceae;Comamonas;	18	0	0	0	0	0	0	0	18	0	0	0	0	0	0	0	0	0	0	0	0	0	0	0	0	0	0	0	0	0	0	0	0	0	0	0	0	0	0	0	0
Bacteria;Bacteroidetes;Bacteroidia;Flavobacteriales;Flavobacteriaceae;Flavobacterium;	17	2	0	1	0	0	1	7	1	0	0	0	0	0	0	0	0	0	0	0	0	0	0	0	1	0	0	0	0	1	1	2	0	0	0	0	0	0	0	0	0
Bacteria;Proteobacteria;Gammaproteobacteria;Enterobacteriales;Enterobacteriaceae;Morganella;	17	0	0	0	0	0	5	0	4	0	0	0	0	0	0	4	0	0	0	0	0	2	0	0	0	0	0	0	0	0	0	0	0	0	0	0	0	2	0	0	0
Bacteria;Firmicutes;Clostridia;Clostridiales;Syntrophomonadaceae;Syntrophomonas;	16	0	0	7	0	0	0	0	6	0	0	0	0	0	0	0	0	0	0	0	0	0	0	0	0	0	2	1	0	0	0	0	0	0	0	0	0	0	0	0	0
Bacteria;Cyanobacteria;Cyanobacteria_unclassified;Cyanobacteria_unclassified;Cyanobacteria_unclassified;Cyanobacteria_unclassified;	15	1	0	0	0	0	0	0	0	0	0	1	0	0	3	0	0	0	0	0	0	0	0	1	0	0	0	2	0	0	0	0	6	0	1	0	0	0	0	0	0
Bacteria;Firmicutes;Clostridia;Clostridiales;Family_XI;Parvimonas;	14	0	0	0	0	0	0	0	0	0	1	0	0	1	0	3	0	0	1	0	0	4	0	0	3	0	0	1	0	0	0	0	0	0	0	0	0	0	0	0	0
Bacteria;Firmicutes;Erysipelotrichia;Erysipelotrichales;Erysipelotrichaceae;Solobacterium;	14	0	0	2	1	0	0	2	2	0	0	1	0	1	0	0	0	1	0	0	1	0	0	0	2	0	0	0	0	0	0	0	1	0	0	0	0	0	0	0	0
Bacteria;Bacteroidetes;Bacteroidia;Bacteroidales;Rikenellaceae;Rikenellaceae_unclassified;	12	0	3	0	0	0	0	0	0	0	0	3	0	0	0	0	0	0	0	0	0	0	0	0	1	0	1	0	0	0	0	2	0	0	1	0	0	0	0	1	0
Bacteria;Firmicutes;Clostridia;Clostridiales;Clostridiaceae_1;Clostridium_sensu_stricto_13;	12	0	0	0	0	0	0	0	0	0	0	0	0	0	0	0	0	0	0	0	12	0	0	0	0	0	0	0	0	0	0	0	0	0	0	0	0	0	0	0	0
Bacteria;Firmicutes;Bacilli;Bacillales;Staphylococcaceae;Staphylococcus;	11	0	0	0	0	0	0	0	0	0	0	0	0	0	0	1	0	0	0	0	0	0	0	0	0	0	0	10	0	0	0	0	0	0	0	0	0	0	0	0	0
Bacteria;Firmicutes;Clostridia;Clostridiales;Lachnospiraceae;Oribacterium;	11	0	0	2	0	0	0	1	0	0	2	0	0	2	0	1	0	0	0	0	0	1	0	0	1	0	0	0	1	0	0	0	0	0	0	0	0	0	0	0	0
Bacteria;Firmicutes;Clostridia;Clostridiales;Lachnospiraceae;Stomatobaculum;	11	0	0	0	0	0	0	5	0	0	0	0	0	0	0	0	0	1	0	1	0	2	0	0	0	0	0	0	0	0	0	1	0	0	1	0	0	0	0	0	0
Bacteria;Proteobacteria;Gammaproteobacteria;Betaproteobacteriales;Neisseriaceae;Neisseria;	11	1	0	0	0	0	2	0	0	0	0	0	0	0	0	0	0	4	0	0	0	1	0	0	0	0	0	0	0	3	0	0	0	0	0	0	0	0	0	0	0
Bacteria;Tenericutes;Mollicutes;Anaeroplasmatales;Anaeroplasmataceae;Anaeroplasma;	10	0	3	0	1	0	0	0	4	0	0	0	0	0	0	0	0	0	0	0	0	0	1	1	0	0	0	0	0	0	0	0	0	0	0	0	0	0	0	0	0
Bacteria;Proteobacteria;Alphaproteobacteria;Sphingomonadales;Sphingomonadaceae;Sphingomonadaceae_unclassified;	9	0	2	0	0	0	3	1	0	0	0	0	0	0	0	0	0	0	0	0	0	0	1	0	0	0	0	0	0	1	1	0	0	0	0	0	0	0	0	0	0
Bacteria;Verrucomicrobia;Verrucomicrobiae;Verrucomicrobiales;Rubritaleaceae;Luteolibacter;	9	1	0	0	0	0	0	0	2	1	0	0	0	0	0	0	0	0	0	0	0	0	0	0	0	0	0	0	0	3	2	0	0	0	0	0	0	0	0	0	0
Bacteria;Firmicutes;Clostridia;Clostridiales;Lachnospiraceae;Coprococcus_3;	8	0	0	0	0	0	0	2	0	0	0	0	0	0	0	0	0	0	0	0	0	1	0	0	0	0	0	0	0	0	1	0	0	0	4	0	0	0	0	0	0
Bacteria;Firmicutes;Negativicutes;Selenomonadales;Selenomonadales_unclassified;Selenomonadales_unclassified;	7	0	0	0	0	0	0	0	0	0	0	0	0	0	0	0	0	0	0	0	0	0	0	0	0	0	0	0	0	0	0	0	0	0	0	5	0	0	0	2	0
Bacteria;Patescibacteria;Saccharimonadia;Saccharimonadales;Saccharimonadales_unclassified;Saccharimonadales_unclassified;	7	0	0	1	1	1	0	1	0	0	0	1	1	0	0	0	0	0	0	0	0	0	0	0	0	0	0	0	1	0	0	0	0	0	0	0	0	0	0	0	0
Bacteria;Planctomycetes;Planctomycetacia;Planctomycetacia_unclassified;Planctomycetacia_unclassified;Planctomycetacia_unclassified;	6	0	0	0	0	0	0	0	1	0	1	3	0	0	0	0	0	0	0	0	0	0	0	0	0	0	0	0	0	0	1	0	0	0	0	0	0	0	0	0	0
Bacteria;Proteobacteria;Gammaproteobacteria;Enterobacteriales;Enterobacteriaceae;Providencia;	6	0	0	0	0	2	0	0	0	0	0	0	3	0	0	0	0	0	0	0	0	0	0	0	0	0	0	0	0	0	0	1	0	0	0	0	0	0	0	0	0
Bacteria;Proteobacteria;Gammaproteobacteria;Pseudomonadales;Moraxellaceae;Acinetobacter;	6	0	0	0	0	0	0	0	2	0	0	0	0	0	0	0	0	0	0	0	0	0	0	0	0	0	0	4	0	0	0	0	0	0	0	0	0	0	0	0	0
Bacteria;Actinobacteria;Actinobacteria;Actinobacteria_unclassified;Actinobacteria_unclassified;Actinobacteria_unclassified;	5	0	1	0	0	0	0	0	0	0	1	2	0	0	0	0	0	0	0	0	1	0	0	0	0	0	0	0	0	0	0	0	0	0	0	0	0	0	0	0	0
Bacteria;Firmicutes;Clostridia;Clostridiales;Family_XI;Finegoldia;	5	0	0	0	0	0	0	0	0	0	0	0	0	2	0	0	0	0	0	0	0	0	0	0	3	0	0	0	0	0	0	0	0	0	0	0	0	0	0	0	0
Bacteria;Nitrospirae;Nitrospira;Nitrospirales;Nitrospiraceae;Nitrospira;	5	0	1	1	0	0	0	0	0	1	0	2	0	0	0	0	0	0	0	0	0	0	0	0	0	0	0	0	0	0	0	0	0	0	0	0	0	0	0	0	0
Bacteria;Proteobacteria;Gammaproteobacteria;Betaproteobacteriales;Neisseriaceae;Neisseriaceae_unclassified;	5	0	0	0	0	0	0	0	0	0	0	0	0	0	0	0	0	0	0	0	0	4	0	0	0	0	0	0	0	0	0	0	1	0	0	0	0	0	0	0	0
Bacteria;Proteobacteria;Gammaproteobacteria;Betaproteobacteriales;Nitrosomonadaceae;Ellin6067;	5	0	0	0	1	0	1	0	1	0	0	0	0	0	0	0	0	0	0	0	0	0	0	0	1	0	0	0	0	1	0	0	0	0	0	0	0	0	0	0	0
Bacteria;Actinobacteria;Actinobacteria;Bifidobacteriales;Bifidobacteriaceae;Scardovia;	4	0	0	0	0	0	0	0	0	1	0	0	0	0	0	0	0	0	0	0	0	0	0	0	0	0	1	0	0	0	0	0	0	2	0	0	0	0	0	0	0
Bacteria;Bacteroidetes;Bacteroidia;Chitinophagales;Chitinophagaceae;Chitinophagaceae_unclassified;	4	0	0	0	0	0	1	0	0	0	1	0	0	0	0	0	0	0	0	0	0	0	0	0	1	0	0	0	0	1	0	0	0	0	0	0	0	0	0	0	0
Bacteria;Firmicutes;Clostridia;Clostridiales;Family_XI;Peptoniphilus;	4	0	0	0	0	0	0	0	0	0	0	0	0	0	2	0	0	0	0	0	0	0	0	0	1	0	0	0	1	0	0	0	0	0	0	0	0	0	0	0	0
Bacteria;Gemmatimonadetes;Gemmatimonadetes;Gemmatimonadales;Gemmatimonadaceae;uncultured;	4	0	0	0	0	0	0	0	1	1	1	0	0	0	0	0	0	0	0	0	0	0	0	0	0	0	0	0	0	0	0	1	0	0	0	0	0	0	0	0	0
Bacteria;Proteobacteria;Gammaproteobacteria;Enterobacteriales;Enterobacteriaceae;Hafnia-Obesumbacterium;	4	0	0	0	0	0	0	0	0	0	0	0	0	0	0	0	0	0	0	0	0	0	0	0	0	0	0	0	0	0	0	0	4	0	0	0	0	0	0	0	0
unknown;unknown_unclassified;unknown_unclassified;unknown_unclassified;unknown_unclassified;unknown_unclassified;	4	0	0	0	0	0	0	0	0	0	0	0	0	0	0	0	0	0	0	0	0	0	0	0	0	0	0	0	0	0	0	0	1	0	0	0	0	1	0	2	0
Bacteria;Acidobacteria;Acidobacteria_unclassified;Acidobacteria_unclassified;Acidobacteria_unclassified;Acidobacteria_unclassified;	3	1	0	0	0	0	0	0	0	0	0	2	0	0	0	0	0	0	0	0	0	0	0	0	0	0	0	0	0	0	0	0	0	0	0	0	0	0	0	0	0
Bacteria;Actinobacteria;Actinobacteria;Bifidobacteriales;Bifidobacteriaceae;Bifidobacteriaceae_unclassified;	3	0	0	0	2	0	0	0	0	0	0	0	0	0	0	0	0	0	0	0	0	0	0	0	0	0	0	0	0	0	0	0	0	0	1	0	0	0	0	0	0
Bacteria;Bacteroidetes;Bacteroidia;Cytophagales;Spirosomaceae;Arcicella;	3	0	0	0	0	0	0	0	0	2	0	0	0	0	0	0	0	0	0	0	0	0	0	0	0	0	0	0	0	0	1	0	0	0	0	0	0	0	0	0	0
Bacteria;Bacteroidetes;Bacteroidia;Sphingobacteriales;env.OPS_17;env.OPS_17_ge;	3	0	0	0	0	0	0	0	1	0	0	0	0	0	0	0	0	0	2	0	0	0	0	0	0	0	0	0	0	0	0	0	0	0	0	0	0	0	0	0	0
Bacteria;Firmicutes;Clostridia;Clostridiales;Lachnospiraceae;Lachnoanaerobaculum;	3	0	0	0	0	0	0	1	0	0	0	0	0	2	0	0	0	0	0	0	0	0	0	0	0	0	0	0	0	0	0	0	0	0	0	0	0	0	0	0	0
Bacteria;Firmicutes;Clostridia;Clostridiales;Ruminococcaceae;Hydrogenoanaerobacterium;	3	0	0	0	0	2	0	0	0	0	0	0	0	0	0	0	1	0	0	0	0	0	0	0	0	0	0	0	0	0	0	0	0	0	0	0	0	0	0	0	0
Bacteria;Planctomycetes;Planctomycetacia;Pirellulales;Pirellulaceae;Pirellula;	3	1	0	0	0	0	0	0	1	0	0	0	0	0	0	0	0	0	0	0	0	0	1	0	0	0	0	0	0	0	0	0	0	0	0	0	0	0	0	0	0
Bacteria;Proteobacteria;Alphaproteobacteria;Caulobacterales;Caulobacteraceae;Brevundimonas;	3	0	0	0	0	0	0	3	0	0	0	0	0	0	0	0	0	0	0	0	0	0	0	0	0	0	0	0	0	0	0	0	0	0	0	0	0	0	0	0	0
Bacteria;Proteobacteria;Alphaproteobacteria;Sphingomonadales;Sphingomonadaceae;Novosphingobium;	3	0	0	0	1	0	0	0	0	0	0	0	0	0	0	0	0	0	0	0	1	0	0	0	0	0	0	0	0	1	0	0	0	0	0	0	0	0	0	0	0
Bacteria;Proteobacteria;Gammaproteobacteria;Xanthomonadales;Xanthomonadaceae;Arenimonas;	3	1	1	0	0	0	0	0	0	0	0	1	0	0	0	0	0	0	0	0	0	0	0	0	0	0	0	0	0	0	0	0	0	0	0	0	0	0	0	0	0
Bacteria;Proteobacteria;Gammaproteobacteria;Xanthomonadales;Xanthomonadaceae;Xanthomonadaceae_unclassified;	3	1	0	0	0	0	0	0	2	0	0	0	0	0	0	0	0	0	0	0	0	0	0	0	0	0	0	0	0	0	0	0	0	0	0	0	0	0	0	0	0
Bacteria;Actinobacteria;Actinobacteria;Micrococcales;Micrococcaceae;Arthrobacter;	2	0	0	0	0	0	1	0	0	0	0	0	0	0	0	0	0	0	0	0	0	0	0	0	0	0	0	0	0	0	0	0	1	0	0	0	0	0	0	0	0
Bacteria;Actinobacteria;Actinobacteria;Micrococcales;Micrococcales_unclassified;Micrococcales_unclassified;	2	0	0	0	0	0	0	0	0	0	1	0	0	0	0	0	0	0	0	0	1	0	0	0	0	0	0	0	0	0	0	0	0	0	0	0	0	0	0	0	0
Bacteria;Actinobacteria;Coriobacteriia;Coriobacteriales;Atopobiaceae;Olsenella;	2	0	0	0	1	0	0	0	0	0	1	0	0	0	0	0	0	0	0	0	0	0	0	0	0	0	0	0	0	0	0	0	0	0	0	0	0	0	0	0	0
Bacteria;Bacteroidetes;Bacteroidia;Bacteroidales;Porphyromonadaceae;Porphyromonas;	2	0	0	0	0	0	0	0	0	0	0	0	1	0	0	0	0	0	0	0	0	0	0	0	1	0	0	0	0	0	0	0	0	0	0	0	0	0	0	0	0
Bacteria;Bacteroidetes;Bacteroidia;Bacteroidales;Prevotellaceae;Prevotella;	2	0	0	0	0	0	0	0	0	0	0	0	0	0	0	0	0	0	0	0	0	0	0	0	1	0	0	0	0	0	0	0	0	0	1	0	0	0	0	0	0
Bacteria;Bacteroidetes;Bacteroidia;Cytophagales;Microscillaceae;uncultured;	2	0	1	0	1	0	0	0	0	0	0	0	0	0	0	0	0	0	0	0	0	0	0	0	0	0	0	0	0	0	0	0	0	0	0	0	0	0	0	0	0
Bacteria;Firmicutes;Bacilli;Bacilli_unclassified;Bacilli_unclassified;Bacilli_unclassified;	2	0	0	0	0	0	0	0	0	0	0	0	0	0	2	0	0	0	0	0	0	0	0	0	0	0	0	0	0	0	0	0	0	0	0	0	0	0	0	0	0
Bacteria;Firmicutes;Bacilli;Lactobacillales;Enterococcaceae;Enterococcaceae_unclassified;	2	0	0	0	0	0	1	0	0	0	1	0	0	0	0	0	0	0	0	0	0	0	0	0	0	0	0	0	0	0	0	0	0	0	0	0	0	0	0	0	0
Bacteria;Firmicutes;Clostridia;Clostridiales;Clostridiaceae_1;Clostridium_sensu_stricto_12;	2	0	0	0	0	0	0	0	0	0	1	0	1	0	0	0	0	0	0	0	0	0	0	0	0	0	0	0	0	0	0	0	0	0	0	0	0	0	0	0	0
Bacteria;Firmicutes;Clostridia;Clostridiales;Family_XI;Family_XI_unclassified;	2	0	0	0	0	0	0	0	0	0	0	0	0	0	0	0	0	0	0	0	0	1	0	0	0	0	0	0	0	0	0	0	0	0	0	0	0	0	0	0	1
Bacteria;Firmicutes;Negativicutes;Selenomonadales;Veillonellaceae;Selenomonas_4;	2	0	0	0	0	1	0	0	0	0	1	0	0	0	0	0	0	0	0	0	0	0	0	0	0	0	0	0	0	0	0	0	0	0	0	0	0	0	0	0	0
Bacteria;Patescibacteria;Gracilibacteria;JGI_0000069-P22;JGI_0000069-P22_fa;JGI_0000069-P22_ge;	2	0	0	0	0	0	0	0	2	0	0	0	0	0	0	0	0	0	0	0	0	0	0	0	0	0	0	0	0	0	0	0	0	0	0	0	0	0	0	0	0
Bacteria;Patescibacteria;Parcubacteria;Parcubacteria_unclassified;Parcubacteria_unclassified;Parcubacteria_unclassified;	2	0	0	0	0	0	0	0	0	0	0	0	0	0	0	0	0	0	0	0	0	0	0	0	2	0	0	0	0	0	0	0	0	0	0	0	0	0	0	0	0
Bacteria;Patescibacteria;Saccharimonadia;Saccharimonadales;Saccharimonadaceae;Candidatus_Saccharimonas;	2	0	0	0	0	0	0	0	1	0	1	0	0	0	0	0	0	0	0	0	0	0	0	0	0	0	0	0	0	0	0	0	0	0	0	0	0	0	0	0	0
Bacteria;Planctomycetes;Planctomycetacia;Gemmatales;Gemmataceae;Gemmata;	2	0	0	0	0	0	0	0	0	0	0	0	0	0	0	0	0	0	0	0	0	0	0	0	0	0	0	0	0	1	1	0	0	0	0	0	0	0	0	0	0
Bacteria;Planctomycetes;Planctomycetacia;Planctomycetales;uncultured;uncultured_ge;	2	0	0	0	0	0	0	0	0	0	0	0	0	0	0	0	0	0	0	0	0	0	0	0	1	0	0	0	0	0	1	0	0	0	0	0	0	0	0	0	0
Bacteria;Proteobacteria;Alphaproteobacteria;Rhizobiales;Beijerinckiaceae;Bosea;	2	0	0	0	0	0	0	2	0	0	0	0	0	0	0	0	0	0	0	0	0	0	0	0	0	0	0	0	0	0	0	0	0	0	0	0	0	0	0	0	0
Bacteria;Proteobacteria;Alphaproteobacteria;Rhizobiales;Devosiaceae;Devosia;	2	1	0	0	0	0	0	0	0	0	0	0	0	1	0	0	0	0	0	0	0	0	0	0	0	0	0	0	0	0	0	0	0	0	0	0	0	0	0	0	0
Bacteria;Proteobacteria;Alphaproteobacteria;Rhodobacterales;Rhodobacteraceae;Rhodobacter;	2	0	0	0	0	0	0	0	2	0	0	0	0	0	0	0	0	0	0	0	0	0	0	0	0	0	0	0	0	0	0	0	0	0	0	0	0	0	0	0	0
Bacteria;Proteobacteria;Alphaproteobacteria;Rhodobacterales;Rhodobacteraceae;Rhodobacteraceae_unclassified;	2	0	0	0	0	0	0	0	0	0	1	0	0	0	0	0	0	0	0	0	0	0	0	0	0	0	0	0	0	0	1	0	0	0	0	0	0	0	0	0	0
Bacteria;Proteobacteria;Deltaproteobacteria;Deltaproteobacteria_unclassified;Deltaproteobacteria_unclassified;Deltaproteobacteria_unclassified;	2	0	0	0	0	0	0	0	1	0	0	0	0	0	0	0	0	0	0	0	0	0	0	0	0	0	0	0	0	0	0	0	0	0	0	0	0	1	0	0	0
Bacteria;Proteobacteria;Gammaproteobacteria;Aeromonadales;Aeromonadaceae;Aeromonas;	2	0	0	0	0	0	0	0	2	0	0	0	0	0	0	0	0	0	0	0	0	0	0	0	0	0	0	0	0	0	0	0	0	0	0	0	0	0	0	0	0
Bacteria;Proteobacteria;Gammaproteobacteria;Betaproteobacteriales;Burkholderiaceae;Delftia;	2	0	0	0	0	1	0	0	0	0	0	0	0	0	0	0	0	0	0	0	0	0	0	0	0	0	0	0	0	0	1	0	0	0	0	0	0	0	0	0	0
Bacteria;Proteobacteria;Gammaproteobacteria;Betaproteobacteriales;Methylophilaceae;Methylotenera;	2	1	0	0	0	0	0	0	0	0	0	0	0	0	0	0	0	0	0	0	0	0	0	0	0	0	0	0	0	0	0	1	0	0	0	0	0	0	0	0	0
Bacteria;Proteobacteria;Gammaproteobacteria;Betaproteobacteriales;Nitrosomonadaceae;MND1;	2	0	0	0	0	0	0	0	0	0	0	1	0	0	1	0	0	0	0	0	0	0	0	0	0	0	0	0	0	0	0	0	0	0	0	0	0	0	0	0	0
Bacteria;Proteobacteria;Gammaproteobacteria;Betaproteobacteriales;TRA3-20;TRA3-20_ge;	2	0	0	0	0	0	0	1	0	0	0	0	0	0	0	0	1	0	0	0	0	0	0	0	0	0	0	0	0	0	0	0	0	0	0	0	0	0	0	0	0
Bacteria;Proteobacteria;Gammaproteobacteria;Pseudomonadales;Moraxellaceae;Psychrobacter;	2	0	0	0	0	0	0	0	0	0	2	0	0	0	0	0	0	0	0	0	0	0	0	0	0	0	0	0	0	0	0	0	0	0	0	0	0	0	0	0	0
Bacteria;Verrucomicrobia;Verrucomicrobiae;Pedosphaerales;Pedosphaeraceae;Pedosphaeraceae_unclassified;	2	0	1	0	0	0	0	0	0	0	0	0	0	0	0	0	0	0	0	0	0	0	0	0	1	0	0	0	0	0	0	0	0	0	0	0	0	0	0	0	0
Bacteria;Acidobacteria;Acidobacteriia;Solibacterales;Solibacteraceae_(Subgroup_3);Bryobacter;	1	0	0	0	0	0	0	0	0	0	0	0	0	0	0	0	0	0	0	0	0	0	0	0	0	0	0	0	0	0	1	0	0	0	0	0	0	0	0	0	0
Bacteria;Acidobacteria;Blastocatellia_(Subgroup_4);Blastocatellales;Blastocatellaceae;Blastocatellaceae_unclassified;	1	0	0	0	0	0	0	0	0	0	1	0	0	0	0	0	0	0	0	0	0	0	0	0	0	0	0	0	0	0	0	0	0	0	0	0	0	0	0	0	0
Bacteria;Acidobacteria;Blastocatellia_(Subgroup_4);Blastocatellales;Blastocatellaceae;JGI_0001001-H03;	1	0	0	0	0	0	1	0	0	0	0	0	0	0	0	0	0	0	0	0	0	0	0	0	0	0	0	0	0	0	0	0	0	0	0	0	0	0	0	0	0
Bacteria;Acidobacteria;Blastocatellia_(Subgroup_4);Pyrinomonadales;Pyrinomonadaceae;RB41;	1	0	0	0	0	0	0	0	0	0	0	0	0	0	0	0	0	0	1	0	0	0	0	0	0	0	0	0	0	0	0	0	0	0	0	0	0	0	0	0	0
Bacteria;Acidobacteria;Subgroup_5;Subgroup_5_or;Subgroup_5_fa;Subgroup_5_ge;	1	0	0	0	1	0	0	0	0	0	0	0	0	0	0	0	0	0	0	0	0	0	0	0	0	0	0	0	0	0	0	0	0	0	0	0	0	0	0	0	0
Bacteria;Acidobacteria;Subgroup_6;Subgroup_6_or;Subgroup_6_fa;Subgroup_6_ge;	1	0	0	0	0	0	0	0	0	0	0	0	0	0	0	0	0	0	0	0	0	0	0	0	0	0	0	0	0	0	0	1	0	0	0	0	0	0	0	0	0
Bacteria;Actinobacteria;Acidimicrobiia;Acidimicrobiia_unclassified;Acidimicrobiia_unclassified;Acidimicrobiia_unclassified;	1	0	0	0	0	0	0	0	0	0	0	0	0	0	0	0	0	0	0	0	0	0	0	0	0	0	0	0	0	0	1	0	0	0	0	0	0	0	0	0	0
Bacteria;Actinobacteria;Actinobacteria;Micrococcales;Cellulomonadaceae;Tropheryma;	1	0	0	0	0	0	0	0	0	0	0	0	0	0	0	0	0	0	0	0	0	0	0	0	0	0	1	0	0	0	0	0	0	0	0	0	0	0	0	0	0
Bacteria;Actinobacteria;Actinobacteria;Micrococcales;Intrasporangiaceae;Tetrasphaera;	1	0	0	0	0	0	0	0	1	0	0	0	0	0	0	0	0	0	0	0	0	0	0	0	0	0	0	0	0	0	0	0	0	0	0	0	0	0	0	0	0
Bacteria;Actinobacteria;Actinobacteria;Micrococcales;Microbacteriaceae;Microbacteriaceae_unclassified;	1	0	0	0	0	0	0	0	0	0	0	0	1	0	0	0	0	0	0	0	0	0	0	0	0	0	0	0	0	0	0	0	0	0	0	0	0	0	0	0	0
Bacteria;Actinobacteria;Coriobacteriia;Coriobacteriales;Atopobiaceae;Atopobium;	1	0	0	0	0	0	0	0	0	0	0	0	0	0	0	0	0	0	0	0	0	0	0	0	1	0	0	0	0	0	0	0	0	0	0	0	0	0	0	0	0
Bacteria;Bacteroidetes;Bacteroidia;Bacteroidales;Dysgonomonadaceae;Dysgonomonadaceae_unclassified;	1	0	0	0	0	0	0	0	0	0	0	0	0	0	0	0	0	0	0	0	0	0	0	0	0	0	0	0	0	0	0	0	0	0	0	0	0	0	0	1	0
Bacteria;Bacteroidetes;Bacteroidia;Bacteroidales;Marinifilaceae;Marinifilaceae_unclassified;	1	0	0	0	0	0	0	0	0	0	0	0	0	0	0	0	0	0	0	0	1	0	0	0	0	0	0	0	0	0	0	0	0	0	0	0	0	0	0	0	0
Bacteria;Bacteroidetes;Bacteroidia;Chitinophagales;Chitinophagaceae;Ferruginibacter;	1	0	0	0	0	0	0	0	0	0	0	0	0	0	0	0	0	0	0	0	0	0	0	0	0	0	0	0	0	1	0	0	0	0	0	0	0	0	0	0	0
Bacteria;Bacteroidetes;Bacteroidia;Cytophagales;Spirosomaceae;Emticicia;	1	0	0	0	0	0	0	0	1	0	0	0	0	0	0	0	0	0	0	0	0	0	0	0	0	0	0	0	0	0	0	0	0	0	0	0	0	0	0	0	0
Bacteria;Bacteroidetes;Bacteroidia;Flavobacteriales;Weeksellaceae;Chryseobacterium;	1	0	0	0	0	0	0	0	0	0	1	0	0	0	0	0	0	0	0	0	0	0	0	0	0	0	0	0	0	0	0	0	0	0	0	0	0	0	0	0	0
Bacteria;Bacteroidetes;Bacteroidia;Sphingobacteriales;Sphingobacteriaceae;Pedobacter;	1	0	0	0	0	0	0	0	0	0	0	0	0	0	0	0	0	0	0	0	0	0	0	0	0	0	0	0	0	0	0	1	0	0	0	0	0	0	0	0	0
Bacteria;Chloroflexi;Anaerolineae;Anaerolineales;Anaerolineaceae;Flexilinea;	1	0	0	0	0	0	0	0	0	0	0	0	0	0	0	0	0	0	0	0	0	0	0	0	0	0	0	0	1	0	0	0	0	0	0	0	0	0	0	0	0
Bacteria;Chloroflexi;Chloroflexi_unclassified;Chloroflexi_unclassified;Chloroflexi_unclassified;Chloroflexi_unclassified;	1	0	0	0	0	0	0	0	0	0	0	0	0	0	1	0	0	0	0	0	0	0	0	0	0	0	0	0	0	0	0	0	0	0	0	0	0	0	0	0	0
Bacteria;Cyanobacteria;Oxyphotobacteria;Oxyphotobacteria_unclassified;Oxyphotobacteria_unclassified;Oxyphotobacteria_unclassified;	1	0	0	0	0	0	0	0	0	0	0	0	0	0	0	0	0	0	0	0	0	0	0	0	0	0	0	1	0	0	0	0	0	0	0	0	0	0	0	0	0
Bacteria;Firmicutes;Bacilli;Lactobacillales;Carnobacteriaceae;Trichococcus;	1	0	0	0	0	0	0	1	0	0	0	0	0	0	0	0	0	0	0	0	0	0	0	0	0	0	0	0	0	0	0	0	0	0	0	0	0	0	0	0	0
Bacteria;Firmicutes;Bacilli;Lactobacillales;Lactobacillaceae;Pediococcus;	1	0	0	0	0	0	0	0	0	0	0	0	0	0	0	0	0	0	0	0	0	0	0	1	0	0	0	0	0	0	0	0	0	0	0	0	0	0	0	0	0
Bacteria;Firmicutes;Clostridia;Clostridiales;Family_XI;Anaerococcus;	1	0	0	0	0	0	0	0	0	0	0	0	0	0	0	0	0	0	0	0	0	0	0	0	1	0	0	0	0	0	0	0	0	0	0	0	0	0	0	0	0
Bacteria;Firmicutes;Clostridia;Clostridiales;Lachnospiraceae;Cellulosilyticum;	1	0	0	0	0	0	0	0	0	1	0	0	0	0	0	0	0	0	0	0	0	0	0	0	0	0	0	0	0	0	0	0	0	0	0	0	0	0	0	0	0
Bacteria;Firmicutes;Clostridia;Clostridiales;Lachnospiraceae;FD2005;	1	0	0	0	0	0	0	0	0	0	0	0	0	0	1	0	0	0	0	0	0	0	0	0	0	0	0	0	0	0	0	0	0	0	0	0	0	0	0	0	0
Bacteria;Firmicutes;Clostridia;Clostridiales;Lachnospiraceae;Herbinix;	1	0	0	0	0	0	0	0	1	0	0	0	0	0	0	0	0	0	0	0	0	0	0	0	0	0	0	0	0	0	0	0	0	0	0	0	0	0	0	0	0
Bacteria;Firmicutes;Clostridia;Clostridiales;Lachnospiraceae;Lachnospiraceae_NK4A136_group;	1	0	0	0	0	0	0	0	0	0	0	0	0	0	0	0	0	0	0	0	0	0	0	0	0	0	0	1	0	0	0	0	0	0	0	0	0	0	0	0	0
Bacteria;Firmicutes;Clostridia;Clostridiales;Peptostreptococcaceae;Clostridioides;	1	0	0	0	0	0	0	0	0	0	0	0	0	0	0	0	0	0	0	0	0	0	0	0	1	0	0	0	0	0	0	0	0	0	0	0	0	0	0	0	0
Bacteria;Firmicutes;Clostridia;Clostridiales;Peptostreptococcaceae;Paraclostridium;	1	0	0	0	0	0	0	0	0	1	0	0	0	0	0	0	0	0	0	0	0	0	0	0	0	0	0	0	0	0	0	0	0	0	0	0	0	0	0	0	0
Bacteria;Firmicutes;Clostridia;Clostridiales;Ruminococcaceae;Caproiciproducens;	1	0	0	0	0	0	0	0	0	0	0	0	0	0	0	0	0	0	0	0	1	0	0	0	0	0	0	0	0	0	0	0	0	0	0	0	0	0	0	0	0
Bacteria;Firmicutes;Clostridia;Clostridiales;Ruminococcaceae;Ethanoligenens;	1	0	0	0	0	0	0	0	0	0	0	0	0	0	0	0	0	0	0	0	0	0	0	0	0	0	0	0	0	0	0	0	1	0	0	0	0	0	0	0	0
Bacteria;Omnitrophicaeota;Omnitrophicaeota_cl;Omnitrophicaeota_or;Omnitrophicaeota_fa;Omnitrophicaeota_ge;	1	0	0	0	1	0	0	0	0	0	0	0	0	0	0	0	0	0	0	0	0	0	0	0	0	0	0	0	0	0	0	0	0	0	0	0	0	0	0	0	0
Bacteria;Planctomycetes;Phycisphaerae;Tepidisphaerales;WD2101_soil_group;WD2101_soil_group_ge;	1	0	0	0	0	0	0	1	0	0	0	0	0	0	0	0	0	0	0	0	0	0	0	0	0	0	0	0	0	0	0	0	0	0	0	0	0	0	0	0	0
Bacteria;Planctomycetes;Planctomycetacia;Gemmatales;Gemmataceae;Gemmataceae_unclassified;	1	0	0	0	0	0	0	0	0	1	0	0	0	0	0	0	0	0	0	0	0	0	0	0	0	0	0	0	0	0	0	0	0	0	0	0	0	0	0	0	0
Bacteria;Planctomycetes;Planctomycetacia;Pirellulales;Pirellulaceae;Pirellulaceae_unclassified;	1	0	0	0	0	0	0	0	0	1	0	0	0	0	0	0	0	0	0	0	0	0	0	0	0	0	0	0	0	0	0	0	0	0	0	0	0	0	0	0	0
Bacteria;Planctomycetes;Planctomycetes_unclassified;Planctomycetes_unclassified;Planctomycetes_unclassified;Planctomycetes_unclassified;	1	0	1	0	0	0	0	0	0	0	0	0	0	0	0	0	0	0	0	0	0	0	0	0	0	0	0	0	0	0	0	0	0	0	0	0	0	0	0	0	0
Bacteria;Proteobacteria;Alphaproteobacteria;Rhizobiales;Beijerinckiaceae;Beijerinckiaceae_unclassified;	1	0	0	0	0	0	0	0	0	0	0	0	0	0	0	0	0	0	0	0	0	0	0	0	0	0	0	0	0	0	0	1	0	0	0	0	0	0	0	0	0
Bacteria;Proteobacteria;Alphaproteobacteria;Rhizobiales;Hyphomicrobiaceae;Hyphomicrobium;	1	0	0	0	0	0	0	0	0	0	0	0	0	0	0	0	0	0	0	0	0	0	0	0	0	0	0	1	0	0	0	0	0	0	0	0	0	0	0	0	0
Bacteria;Proteobacteria;Alphaproteobacteria;Rhizobiales;Rhizobiales_Incertae_Sedis;uncultured;	1	0	0	0	0	0	0	0	0	0	0	0	0	0	0	0	0	1	0	0	0	0	0	0	0	0	0	0	0	0	0	0	0	0	0	0	0	0	0	0	0
Bacteria;Proteobacteria;Alphaproteobacteria;Rhizobiales;Rhizobiales_unclassified;Rhizobiales_unclassified;	1	0	0	0	0	0	0	0	0	0	0	0	0	0	0	0	0	0	0	0	0	0	0	0	0	0	0	0	0	1	0	0	0	0	0	0	0	0	0	0	0
Bacteria;Proteobacteria;Alphaproteobacteria;Rhizobiales;Xanthobacteraceae;Xanthobacteraceae_unclassified;	1	0	0	0	1	0	0	0	0	0	0	0	0	0	0	0	0	0	0	0	0	0	0	0	0	0	0	0	0	0	0	0	0	0	0	0	0	0	0	0	0
Bacteria;Proteobacteria;Alphaproteobacteria;Rhizobiales;Xanthobacteraceae;uncultured;	1	0	0	0	0	0	0	0	1	0	0	0	0	0	0	0	0	0	0	0	0	0	0	0	0	0	0	0	0	0	0	0	0	0	0	0	0	0	0	0	0
Bacteria;Proteobacteria;Alphaproteobacteria;Rhodobacterales;Rhodobacteraceae;uncultured;	1	0	0	0	0	1	0	0	0	0	0	0	0	0	0	0	0	0	0	0	0	0	0	0	0	0	0	0	0	0	0	0	0	0	0	0	0	0	0	0	0
Bacteria;Proteobacteria;Alphaproteobacteria;Sneathiellales;Sneathiellaceae;uncultured;	1	0	0	0	0	0	0	1	0	0	0	0	0	0	0	0	0	0	0	0	0	0	0	0	0	0	0	0	0	0	0	0	0	0	0	0	0	0	0	0	0
Bacteria;Proteobacteria;Alphaproteobacteria;Sphingomonadales;Sphingomonadaceae;Sphingopyxis;	1	0	0	0	0	0	0	1	0	0	0	0	0	0	0	0	0	0	0	0	0	0	0	0	0	0	0	0	0	0	0	0	0	0	0	0	0	0	0	0	0
Bacteria;Proteobacteria;Deltaproteobacteria;Desulfarculales;Desulfarculaceae;uncultured;	1	0	0	0	1	0	0	0	0	0	0	0	0	0	0	0	0	0	0	0	0	0	0	0	0	0	0	0	0	0	0	0	0	0	0	0	0	0	0	0	0
Bacteria;Proteobacteria;Deltaproteobacteria;Desulfovibrionales;Desulfovibrionales_unclassified;Desulfovibrionales_unclassified;	1	0	0	0	0	0	0	0	0	0	0	0	1	0	0	0	0	0	0	0	0	0	0	0	0	0	0	0	0	0	0	0	0	0	0	0	0	0	0	0	0
Bacteria;Proteobacteria;Deltaproteobacteria;Myxococcales;Myxococcales_unclassified;Myxococcales_unclassified;	1	0	0	0	0	0	0	0	0	0	0	1	0	0	0	0	0	0	0	0	0	0	0	0	0	0	0	0	0	0	0	0	0	0	0	0	0	0	0	0	0
Bacteria;Proteobacteria;Deltaproteobacteria;RCP2-54;RCP2-54_fa;RCP2-54_ge;	1	1	0	0	0	0	0	0	0	0	0	0	0	0	0	0	0	0	0	0	0	0	0	0	0	0	0	0	0	0	0	0	0	0	0	0	0	0	0	0	0
Bacteria;Proteobacteria;Gammaproteobacteria;Betaproteobacteriales;Burkholderiaceae;Aquabacterium;	1	0	0	0	0	0	0	0	0	0	0	0	0	0	0	0	0	0	0	0	0	0	1	0	0	0	0	0	0	0	0	0	0	0	0	0	0	0	0	0	0
Bacteria;Proteobacteria;Gammaproteobacteria;Betaproteobacteriales;Burkholderiaceae;Diaphorobacter;	1	0	0	0	0	0	0	0	1	0	0	0	0	0	0	0	0	0	0	0	0	0	0	0	0	0	0	0	0	0	0	0	0	0	0	0	0	0	0	0	0
Bacteria;Proteobacteria;Gammaproteobacteria;Betaproteobacteriales;Burkholderiaceae;Massilia;	1	0	0	0	0	0	0	1	0	0	0	0	0	0	0	0	0	0	0	0	0	0	0	0	0	0	0	0	0	0	0	0	0	0	0	0	0	0	0	0	0
Bacteria;Proteobacteria;Gammaproteobacteria;Betaproteobacteriales;Burkholderiaceae;Rhodoferax;	1	0	1	0	0	0	0	0	0	0	0	0	0	0	0	0	0	0	0	0	0	0	0	0	0	0	0	0	0	0	0	0	0	0	0	0	0	0	0	0	0
Bacteria;Proteobacteria;Gammaproteobacteria;Betaproteobacteriales;Nitrosomonadaceae;IS-44;	1	0	0	0	0	0	0	0	0	0	0	1	0	0	0	0	0	0	0	0	0	0	0	0	0	0	0	0	0	0	0	0	0	0	0	0	0	0	0	0	0
Bacteria;Proteobacteria;Gammaproteobacteria;Betaproteobacteriales;Nitrosomonadaceae;Nitrosospira;	1	0	0	0	0	0	0	0	0	0	1	0	0	0	0	0	0	0	0	0	0	0	0	0	0	0	0	0	0	0	0	0	0	0	0	0	0	0	0	0	0
Bacteria;Proteobacteria;Gammaproteobacteria;Betaproteobacteriales;SC-I-84;SC-I-84_ge;	1	0	0	0	0	0	0	0	0	0	0	0	0	1	0	0	0	0	0	0	0	0	0	0	0	0	0	0	0	0	0	0	0	0	0	0	0	0	0	0	0
Bacteria;Proteobacteria;Gammaproteobacteria;Enterobacteriales;Enterobacteriaceae;Citrobacter;	1	0	0	0	0	0	0	0	0	0	0	0	0	0	0	0	0	0	0	0	0	0	0	0	1	0	0	0	0	0	0	0	0	0	0	0	0	0	0	0	0
Bacteria;Proteobacteria;Gammaproteobacteria;Enterobacteriales;Enterobacteriaceae;Enterobacter;	1	0	0	0	0	0	0	0	0	0	1	0	0	0	0	0	0	0	0	0	0	0	0	0	0	0	0	0	0	0	0	0	0	0	0	0	0	0	0	0	0
Bacteria;Proteobacteria;Gammaproteobacteria;Oceanospirillales;Halomonadaceae;Cobetia;	1	0	1	0	0	0	0	0	0	0	0	0	0	0	0	0	0	0	0	0	0	0	0	0	0	0	0	0	0	0	0	0	0	0	0	0	0	0	0	0	0
Bacteria;Proteobacteria;Gammaproteobacteria;Pasteurellales;Pasteurellaceae;Aggregatibacter;	1	0	0	0	0	0	0	0	0	0	0	0	0	0	0	0	0	0	0	0	0	0	0	0	0	0	0	0	0	0	0	0	1	0	0	0	0	0	0	0	0
Bacteria;Proteobacteria;Gammaproteobacteria;Xanthomonadales;Xanthomonadaceae;Stenotrophomonas;	1	0	0	0	0	0	0	0	0	0	0	0	0	0	0	0	0	0	0	0	0	0	0	0	0	0	0	0	0	0	0	0	1	0	0	0	0	0	0	0	0
Bacteria;Proteobacteria;Gammaproteobacteria;Xanthomonadales;Xanthomonadales_unclassified;Xanthomonadales_unclassified;	1	0	0	0	0	0	0	0	0	0	0	0	0	0	0	0	0	0	0	0	0	0	0	0	0	0	1	0	0	0	0	0	0	0	0	0	0	0	0	0	0
Bacteria;Synergistetes;Synergistia;Synergistales;Synergistaceae;Fretibacterium;	1	0	0	0	0	0	0	0	0	0	0	0	0	0	0	0	0	0	0	0	0	0	0	0	0	0	0	0	0	0	0	0	1	0	0	0	0	0	0	0	0
Bacteria;Verrucomicrobia;Verrucomicrobiae;Opitutales;Puniceicoccaceae;Puniceicoccaceae_unclassified;	1	0	0	0	0	0	0	0	0	0	0	0	0	0	0	0	0	0	0	0	0	0	0	0	0	0	0	1	0	0	0	0	0	0	0	0	0	0	0	0	0
Bacteria;Verrucomicrobia;Verrucomicrobiae;Pedosphaerales;Pedosphaeraceae;Pedosphaeraceae_ge;	1	0	0	0	0	0	0	0	0	0	0	0	0	0	0	0	0	0	0	0	0	0	0	0	0	0	0	0	0	0	0	1	0	0	0	0	0	0	0	0	0

## Sheet: otus97-uparse_linux
taxonomy_linux	total	A003	A014	A018	A036	A042	A056	A063	A070	A080	A081	A093	A131	A139	A140	A147	A157	A160	A167	A169	A174	A181	A190	A215	A224	A235	A239	A243	A244	A258	A260	A262	C023	C035	C059	C072	C089	C114	C145	C146	C209	SUM
Root	3123028	140318	121455	137465	175434	51804	82166	96024	140904	24395	105027	106905	63670	35975	57178	74556	30474	54314	91075	99754	139484	110493	97042	113867	102898	27434	125959	125684	74648	85627	36410	151319	103339	12969	17076	28825	13260	15250	14133	14505	23913
Bacteria;Bacteroidetes;Bacteroidia;Bacteroidales;Bacteroidaceae;Bacteroides;	693576	5824	6067	30395	51553	15498	2885	1705	10677	6120	51032	17603	17640	123	7801	12060	9426	18487	13535	39736	15199	33674	28156	10669	11617	4537	26651	32965	24042	40020	13415	66170	21666	608	2461	4225	8029	6633	7988	4577	12107	693576
Bacteria;Firmicutes;Clostridia;Clostridiales;Lachnospiraceae;Lachnospiraceae_unclassified;	215343	5161	6478	4781	8557	3812	19	5592	8422	2688	12108	8619	4469	5067	6388	6178	1473	4196	9145	16603	4841	3492	4325	9854	7400	954	7165	9400	4193	4826	1702	21464	5524	273	1429	3299	1190	1089	630	897	1640	215343
Bacteria;Bacteroidetes;Bacteroidia;Bacteroidales;Rikenellaceae;Alistipes;	180157	12620	831	19630	20973	7128	5	205	10925	1069	4	7859	6000	17	1488	2952	2444	605	970	4245	11169	7601	7171	8375	5104	1585	11877	6993	2988	3	2059	2567	4206	1841	1435	1504	312	270	345	525	2257	180157
Bacteria;Firmicutes;Clostridia;Clostridiales;Ruminococcaceae;Faecalibacterium;	167458	7399	3172	3100	5359	3692	2	441	5820	2910	12	3037	4293	1596	4438	4108	778	4431	5941	3221	6980	10740	12203	8062	4656	3362	233	11301	3850	11970	2297	15810	5020	224	549	3683	607	0	884	1277	0	167458
Bacteria;Bacteroidetes;Bacteroidia;Bacteroidales;Bacteroidales_unclassified;Bacteroidales_unclassified;	165636	6539	2825	12875	12802	1254	179	378	32894	954	31	6688	1973	4	1216	4182	2880	1222	516	15	4883	14123	5279	7942	4832	809	5480	7789	3089	2294	297	9557	4596	485	1283	166	318	1141	635	544	667	165636
Bacteria;Bacteroidetes;Bacteroidia;Bacteroidales;Prevotellaceae;Prevotella_7;	104644	32051	33754	4	3	3	19	872	0	0	0	0	3	3	9763	3	0	1	1	2	16903	2	1	2251	4382	427	2	0	1	0	0	0	0	0	1	4191	0	1	0	0	0	104644
Bacteria;Firmicutes;Clostridia;Clostridiales;Ruminococcaceae;Ruminococcaceae_ge;	101286	1539	2377	2770	1367	1002	27	39224	1150	691	1566	9828	947	1541	276	538	182	179	10674	1215	7471	1376	1107	582	7606	460	1350	644	183	133	240	591	192	443	848	236	74	251	20	361	25	101286
Bacteria;Firmicutes;Clostridia;Clostridiales;Ruminococcaceae;Ruminococcaceae_unclassified;	84293	3427	2826	2780	3195	1135	16	680	4494	582	558	4640	2340	210	1756	3885	735	1489	1415	1633	6135	3513	699	5352	6107	759	4420	3483	2038	798	1020	2257	3409	3119	1432	483	144	638	313	272	106	84293
Bacteria;Bacteria_unclassified;Bacteria_unclassified;Bacteria_unclassified;Bacteria_unclassified;Bacteria_unclassified;	77395	3613	5244	332	970	178	27398	2	1230	509	190	442	569	0	1282	1079	33	10	33	8	4569	532	155	2813	91	25	1080	5139	97	112	56	23	17770	7	345	1354	63	1	0	4	37	77395
Bacteria;Firmicutes;Clostridia;Clostridiales;Ruminococcaceae;Subdoligranulum;	73505	2354	881	5723	4	1454	0	3709	2530	48	1	4482	950	1078	1062	2511	1075	1147	2684	734	5256	3059	3776	886	3461	1428	4360	3140	1575	3610	372	2914	3735	0	765	616	193	253	336	283	1060	73505
Bacteria;Firmicutes;Clostridia;Clostridiales;Ruminococcaceae;CAG-352;	71206	575	426	3055	5594	634	15	12104	720	290	1060	3096	297	386	0	1142	722	738	581	2122	2341	1354	463	4283	2009	544	14670	541	2060	5862	1543	2	628	142	185	155	0	276	95	212	284	71206
Bacteria;Firmicutes;Clostridia;Clostridiales;Lachnospiraceae;uncultured;	62384	2106	1707	1132	1617	570	2	481	3187	1730	2223	1538	2100	1415	2416	2061	23	332	2768	4951	991	341	2667	2957	1141	573	1766	7580	4871	208	623	901	2137	84	402	677	843	208	384	71	600	62384
Bacteria;Firmicutes;Clostridia;Clostridiales;Lachnospiraceae;Agathobacter;	61817	3636	1207	21	296	1816	1	458	785	408	2383	1339	3463	2004	507	986	165	8318	6974	344	1259	6090	830	696	641	125	5155	2358	4033	4	197	981	798	150	433	1039	89	574	702	518	34	61817
Bacteria;Firmicutes;Clostridia;Clostridiales;Ruminococcaceae;Ruminococcus_1;	57525	234	1938	12780	2365	921	0	34	469	1	3921	942	430	3	424	2796	3853	1153	3429	1783	3253	966	454	491	2543	131	774	3029	526	2	252	3	4752	142	519	273	3	313	11	1612	0	57525
Bacteria;Firmicutes;Clostridia;Clostridiales;Lachnospiraceae;Blautia;	55939	2264	519	2842	3173	222	51	4494	511	378	1301	1632	643	5257	677	429	720	997	1724	513	2496	2190	1932	1397	1348	284	4042	1216	994	4311	474	3687	646	155	347	395	248	505	190	106	629	55939
Bacteria;Proteobacteria;Alphaproteobacteria;Alphaproteobacteria_unclassified;Alphaproteobacteria_unclassified;Alphaproteobacteria_unclassified;	53025	6843	860	457	0	0	0	9	4072	1910	0	336	793	15	974	4458	1	0	4	2515	1	0	184	9327	118	13	207	4047	2277	0	1464	0	10494	12	0	21	0	83	0	0	1530	53025
Bacteria;Firmicutes;Clostridia;Clostridiales;Ruminococcaceae;Ruminococcaceae_UCG-002;	46747	2551	805	2585	1750	1227	0	1147	3722	1	0	1104	749	2	1120	429	179	77	503	755	4194	2419	179	2313	6231	829	3883	413	2015	23	1781	823	772	175	494	1124	15	256	33	69	0	46747
Bacteria;Verrucomicrobia;Verrucomicrobiae;Verrucomicrobiales;Verrucomicrobiaceae;uncultured;	44839	777	19	129	7209	10	18071	0	2211	4	2	825	257	140	38	634	0	187	2693	178	617	2	2	32	1629	70	6496	8	930	49	36	3	983	1	164	2	0	350	0	0	81	44839
Bacteria;Firmicutes;Clostridia;Clostridiales;Christensenellaceae;Christensenellaceae_R-7_group;	39143	1006	557	2592	213	1011	0	70	1388	48	0	839	2830	0	1010	2260	35	7	4483	888	1089	1458	3	651	7302	418	209	5441	445	0	16	90	2400	122	178	48	0	0	7	6	23	39143
Bacteria;Firmicutes;Clostridia;Clostridiales;Ruminococcaceae;Ruminococcaceae_UCG-014;	39128	3103	2348	4789	79	18	2	1120	2898	83	1	4114	365	2	547	2018	2	30	183	0	2667	45	1729	2837	4273	1132	2077	1215	850	7	205	2	2	22	354	0	0	8	0	0	1	39128
Bacteria;Bacteroidetes;Bacteroidia;Bacteroidales;Tannerellaceae;Tannerellaceae_unclassified;	37843	6	4157	2614	10204	636	0	133	3646	51	0	0	1255	21	143	479	404	1	400	0	1939	710	2548	575	330	296	1894	2	1289	0	184	1	2642	113	190	105	0	630	0	245	0	37843
Bacteria;Bacteroidetes;Bacteroidia;Bacteroidales;Tannerellaceae;Parabacteroides;	37354	1631	111	1959	1	682	1351	65	172	602	0	1656	645	8	333	907	653	1066	264	1796	914	1579	3782	1667	271	60	3261	1450	509	2767	945	3791	1080	50	70	69	0	161	111	285	630	37354
Bacteria;Firmicutes;Clostridia;Clostridiales;Lachnospiraceae;Fusicatenibacter;	35564	462	176	859	2633	356	2	345	1075	127	1357	856	626	731	149	2053	0	685	3512	5147	657	2259	3016	483	559	506	262	615	587	1	265	2451	812	324	341	376	253	1	139	136	370	35564
Bacteria;Firmicutes;Negativicutes;Selenomonadales;Acidaminococcaceae;Phascolarctobacterium;	32362	863	2147	2237	0	95	3176	90	1	514	0	9071	2374	0	0	84	13	0	2230	5513	574	28	0	291	1489	0	2	1	150	0	210	0	634	66	108	18	56	0	114	1	212	32362
Bacteria;Proteobacteria;Gammaproteobacteria;Betaproteobacteriales;Burkholderiaceae;Parasutterella;	30901	0	3	30	13192	740	3	0	0	0	0	2396	31	1	3	795	725	2065	580	0	93	0	793	4	12	0	1	756	699	1170	0	5876	0	13	59	319	120	0	0	35	387	30901
Bacteria;Proteobacteria;Gammaproteobacteria;Betaproteobacteriales;Burkholderiaceae;Burkholderiaceae_unclassified;	27833	5500	1998	75	300	15	0	9	3371	0	0	0	1423	205	1002	26	0	1	184	78	1038	3177	4868	3327	146	135	690	0	0	0	0	0	131	29	44	0	0	0	5	56	0	27833
Bacteria;Bacteroidetes;Bacteroidia;Bacteroidales;Prevotellaceae;Prevotellaceae_unclassified;	27187	1492	1536	0	1	0	55	1424	9953	4	30	1	0	5	1752	895	0	0	0	0	3879	0	0	2838	462	191	0	1639	0	2	0	0	3	0	563	462	0	0	0	0	0	27187
Bacteria;Firmicutes;Clostridia;Clostridiales;Lachnospiraceae;Roseburia;	26191	774	448	379	17	99	0	222	960	79	3348	1073	333	86	146	423	42	2770	1167	1022	256	314	396	207	400	339	497	1484	3445	1	1333	1717	973	32	49	216	257	145	630	86	26	26191
Bacteria;Actinobacteria;Actinobacteria;Bifidobacteriales;Bifidobacteriaceae;Bifidobacterium;	24155	76	133	1320	514	671	16	2269	43	0	2851	1706	16	1132	21	435	880	170	4344	0	1440	2077	131	14	1004	0	1638	142	89	3	4	335	34	623	6	0	0	0	0	6	12	24155
Bacteria;Proteobacteria;Gammaproteobacteria;Enterobacteriales;Enterobacteriaceae;Escherichia-Shigella;	23134	1	2	180	139	16	2080	99	26	813	174	1628	1341	28	9	23	3	11	20	2	7455	262	0	30	203	39	20	235	1891	4342	1302	3	3	3	0	1	3	4	6	735	2	23134
Bacteria;Firmicutes;Erysipelotrichia;Erysipelotrichales;Erysipelotrichaceae;Erysipelotrichaceae_unclassified;	22752	156	98	883	182	30	0	7407	32	19	0	1464	472	3634	491	29	8	119	1495	926	28	321	472	222	390	63	1374	194	105	398	45	1454	91	13	13	35	67	8	4	10	0	22752
Bacteria;Firmicutes;Clostridia;Clostridiales;Ruminococcaceae;Ruminiclostridium_6;	21355	6481	203	113	1288	307	12	19	2650	0	0	940	3	1	314	7	2	1	2	2	22	5	1	6857	80	281	13	0	0	1	830	14	0	374	39	12	0	3	1	2	475	21355
Bacteria;Firmicutes;Clostridia;Clostridiales;Lachnospiraceae;Lachnoclostridium;	19903	986	251	307	359	228	0	2360	314	183	1075	139	143	4279	670	270	95	34	512	216	1732	954	112	126	570	107	556	115	207	976	139	637	242	190	100	112	61	39	9	332	166	19903
Bacteria;Proteobacteria;Gammaproteobacteria;Enterobacteriales;Enterobacteriaceae;Enterobacteriaceae_unclassified;	18283	161	227	0	195	1	14334	1	28	2	236	1	5	0	629	7	0	21	1	0	0	0	1	599	54	1	14	129	0	0	647	1	408	0	0	0	0	0	0	580	0	18283
Bacteria;Firmicutes;Negativicutes;Selenomonadales;Veillonellaceae;Veillonella;	17725	29	4	11	10	414	2	50	88	51	15020	26	13	27	398	72	0	324	15	35	1	42	41	19	35	1	17	79	8	55	1	625	16	88	1	0	0	3	0	87	17	17725
Bacteria;Firmicutes;Negativicutes;Selenomonadales;Veillonellaceae;Dialister;	17596	1294	0	0	5614	133	91	0	287	0	223	0	0	0	486	0	3	0	0	0	0	579	132	313	1	821	5819	159	288	59	3	1249	0	1	0	0	0	40	1	0	0	17596
Bacteria;Firmicutes;Bacilli;Lactobacillales;Streptococcaceae;Streptococcus;	16690	83	109	87	35	32	10133	156	78	18	640	16	41	56	2165	655	16	361	520	88	26	228	35	9	76	12	49	652	10	30	44	34	11	65	0	7	1	9	1	79	23	16690
Bacteria;Firmicutes;Clostridia;Clostridiales;Ruminococcaceae;Ruminococcaceae_UCG-005;	16397	1479	893	397	202	897	12	109	1292	6	1	323	449	15	318	818	8	19	59	148	1706	175	46	2230	1767	320	25	508	324	37	572	76	347	91	426	219	1	6	6	40	30	16397
Bacteria;Bacteroidetes;Bacteroidia;Bacteroidales;Prevotellaceae;Prevotellaceae_UCG-003;	15795	1710	466	0	1	240	0	41	3959	0	0	1	0	0	673	1203	357	2	2023	2	729	0	2564	1171	319	334	0	0	0	0	0	0	0	0	0	0	0	0	0	0	0	15795
Bacteria;Bacteroidetes;Bacteroidia;Bacteroidales;Marinifilaceae;Odoribacter;	13986	845	175	1433	1	205	0	73	1123	0	0	1470	745	0	218	312	170	0	106	410	1300	863	727	325	368	181	290	1314	558	2	126	0	172	6	12	80	111	119	0	80	66	13986
Bacteria;Firmicutes;Clostridia;Clostridiales;Lachnospiraceae;Lachnospiraceae_ge;	13718	231	367	640	889	60	0	1231	53	35	98	420	232	880	619	178	412	0	1180	0	508	235	592	124	367	538	452	179	511	0	41	138	166	70	273	1815	9	54	20	6	95	13718
Bacteria;Actinobacteria;Coriobacteriia;Coriobacteriales;Coriobacteriaceae;Collinsella;	13117	985	194	102	20	133	0	1636	83	2	0	81	0	1491	236	87	97	462	596	0	1444	546	253	90	2949	62	1165	138	135	0	7	33	43	28	10	1	0	0	5	3	0	13117
Bacteria;Firmicutes;Clostridia;Clostridiales;Ruminococcaceae;Ruminococcaceae_UCG-010;	12774	770	1871	1031	34	35	0	8	2063	0	0	261	223	0	173	112	13	35	1	66	1477	0	0	489	450	102	0	3207	3	0	25	0	247	28	31	4	0	0	0	15	0	12774
Bacteria;Firmicutes;Clostridia;Clostridiales;Ruminococcaceae;Flavonifractor;	11812	420	108	418	1166	127	1	176	169	77	1835	143	115	101	168	274	55	357	176	582	474	623	258	213	299	139	865	281	196	222	42	732	144	330	99	46	31	132	149	25	44	11812
Bacteria;Bacteroidetes;Bacteroidia;Bacteroidales;Rikenellaceae;Rikenellaceae_RC9_gut_group;	11682	0	8499	1	0	1	0	1	3030	1	0	0	0	0	0	0	0	0	0	0	0	0	0	5	9	135	0	0	0	0	0	0	0	0	0	0	0	0	0	0	0	11682
Bacteria;Firmicutes;Clostridia;Clostridiales;Lachnospiraceae;Butyrivibrio;	10727	0	6910	0	0	0	0	0	15	4	7	4	8	0	2	0	0	5	0	3	0	0	1	6	312	3447	1	0	0	0	0	1	0	0	0	1	0	0	0	0	0	10727
Bacteria;Firmicutes;Clostridia;Clostridiales;Ruminococcaceae;Oscillospira;	10656	280	475	90	102	8	0	5	954	108	1	617	219	10	801	114	8	449	198	7	83	313	1285	1231	71	135	3	900	470	0	66	527	409	148	221	109	45	89	51	30	24	10656
Bacteria;Firmicutes;Clostridia;Clostridiales;Clostridiales_unclassified;Clostridiales_unclassified;	9824	1362	669	414	179	346	48	62	676	8	7	134	56	6	44	553	21	15	31	39	319	185	4	2092	676	29	111	624	19	3	17	28	459	498	22	24	0	1	1	11	31	9824
Bacteria;Firmicutes;Clostridia;Clostridiales;Lachnospiraceae;Coprococcus_2;	9567	1355	703	1819	386	3	0	0	373	0	3	694	642	0	118	216	0	260	0	0	356	0	0	255	704	34	844	0	1	0	0	0	574	0	185	0	0	0	42	0	0	9567
Bacteria;Bacteroidetes;Bacteroidia;Bacteroidales;Prevotellaceae;Alloprevotella;	9282	1	6840	1	5	0	4	5	6	0	3	2	0	2	0	2	0	0	1	0	3	3	0	2379	3	0	3	2	0	3	3	4	3	3	0	0	0	0	0	1	0	9282
Bacteria;Tenericutes;Mollicutes;Mollicutes_unclassified;Mollicutes_unclassified;Mollicutes_unclassified;	9144	1185	3001	121	1146	0	0	1	2110	1	0	35	142	0	0	591	1	2	0	0	156	1	0	575	2	0	0	63	0	2	2	1	0	5	0	0	0	0	0	0	1	9144
Bacteria;Proteobacteria;Deltaproteobacteria;Desulfovibrionales;Desulfovibrionaceae;Bilophila;	8383	391	56	97	2982	35	156	6	464	55	0	0	63	10	142	336	139	147	27	418	272	74	592	155	62	4	285	146	258	266	265	0	106	21	88	83	41	49	43	23	26	8383
Bacteria;Firmicutes;Clostridia;Clostridiales;Christensenellaceae;Christensenellaceae_unclassified;	7945	248	61	1359	13	790	0	20	802	3	0	84	70	0	80	230	10	0	0	0	2356	110	0	294	905	258	69	108	7	0	1	0	0	10	36	4	0	0	7	4	6	7945
Bacteria;Firmicutes;Negativicutes;Selenomonadales;Acidaminococcaceae;Acidaminococcaceae_unclassified;	7389	0	1	0	0	370	0	110	0	0	0	0	0	123	2	2953	1007	436	0	0	0	0	2065	0	0	0	0	0	0	0	0	0	0	45	0	195	0	0	25	57	0	7389
Bacteria;Proteobacteria;Deltaproteobacteria;Desulfovibrionales;Desulfovibrionaceae;Desulfovibrio;	6384	36	292	542	480	157	37	280	32	0	0	0	0	0	163	410	0	0	226	0	502	100	0	704	132	0	279	0	657	0	9	1	0	1147	0	191	0	0	0	7	0	6384
Bacteria;Firmicutes;Firmicutes_unclassified;Firmicutes_unclassified;Firmicutes_unclassified;Firmicutes_unclassified;	5867	1749	78	1118	261	516	19	16	664	7	0	43	3	3	9	160	13	34	0	3	648	9	49	45	35	5	18	237	3	7	10	0	8	56	15	11	0	0	9	2	4	5867
Bacteria;Actinobacteria;Coriobacteriia;Coriobacteriales;Eggerthellaceae;Eggerthella;	5798	388	65	275	111	26	0	958	38	24	71	174	27	1498	99	61	49	31	62	81	233	44	109	101	655	43	110	43	80	98	5	182	8	28	7	5	1	8	0	0	0	5798
Bacteria;Firmicutes;Clostridia;Clostridiales;Peptostreptococcaceae;Peptostreptococcaceae_unclassified;	5766	303	569	17	110	47	11	160	209	205	127	3	131	2	24	67	10	82	41	72	128	218	0	7	1001	7	172	135	65	1	3	1708	108	18	0	0	4	0	1	0	0	5766
Bacteria;Firmicutes;Clostridia;Clostridiales;Ruminococcaceae;Butyricicoccus;	5512	87	24	252	251	104	0	174	25	43	59	255	79	643	237	78	49	109	681	282	280	75	43	39	40	48	75	118	130	123	51	695	47	26	56	52	20	37	79	33	13	5512
Bacteria;Proteobacteria;Gammaproteobacteria;Betaproteobacteriales;Betaproteobacteriales_unclassified;Betaproteobacteriales_unclassified;	5444	0	38	37	0	0	0	85	240	561	0	0	0	0	279	0	0	0	0	0	0	0	0	81	0	6	214	0	0	0	714	0	2827	0	0	0	0	362	0	0	0	5444
Bacteria;Firmicutes;Clostridia;Clostridiales;Lachnospiraceae;Tyzzerella;	5335	164	31	95	17	13	0	11	49	14	0	400	23	16	202	269	0	139	279	871	80	85	381	524	48	116	318	402	211	121	80	27	126	20	15	46	23	84	2	4	29	5335
Bacteria;Firmicutes;Clostridia;Clostridiales;Ruminococcaceae;Ruminococcaceae_NK4A214_group;	4385	62	103	118	1176	85	16	102	51	0	0	252	15	0	37	8	14	0	20	0	173	100	0	15	149	14	699	125	131	0	45	0	105	95	119	508	0	0	4	7	37	4385
Bacteria;Bacteroidetes;Bacteroidia;Bacteroidales;Muribaculaceae;Muribaculaceae_ge;	3912	3	317	434	2	3	2	2	4	2	2	1	0	9	2	2257	0	0	4	3	1	1	7	511	19	3	3	3	1	4	7	5	4	0	0	0	0	295	0	1	0	3912
Bacteria;Cyanobacteria;Oxyphotobacteria;Chloroplast;Chloroplast_fa;Chloroplast_ge;	3755	2	9	2	1849	0	5	0	5	7	7	0	1	6	10	28	1	109	623	7	38	0	12	46	2	0	2	853	1	2	2	2	0	33	52	26	1	9	1	0	2	3755
Bacteria;Firmicutes;Clostridia;Clostridiales;Clostridiaceae_1;Clostridiaceae_1_unclassified;	3529	331	801	32	4	7	14	77	50	130	10	1	108	0	2	20	0	17	1	4	83	84	26	7	429	6	19	322	49	0	20	757	0	97	3	0	14	0	1	3	0	3529
Bacteria;Firmicutes;Negativicutes;Selenomonadales;Veillonellaceae;Veillonellaceae_unclassified;	3519	0	17	0	8	0	34	22	2	0	1	0	0	854	0	244	0	0	0	0	2309	3	0	3	2	0	2	0	0	5	0	0	13	0	0	0	0	0	0	0	0	3519
Bacteria;Firmicutes;Erysipelotrichia;Erysipelotrichales;Erysipelotrichaceae;Faecalitalea;	3501	826	248	36	46	1	10	1335	0	13	14	7	60	3	61	18	3	18	2	43	126	73	5	1	322	0	19	114	30	18	3	19	8	0	1	4	0	12	1	0	1	3501
Bacteria;Firmicutes;Clostridia;Clostridiales;Family_XIII;Family_XIII_unclassified;	3269	91	58	100	68	30	784	159	72	5	0	47	19	0	11	39	68	23	36	28	68	61	39	32	85	8	1195	42	9	8	4	15	10	14	11	9	0	2	6	2	11	3269
Bacteria;Firmicutes;Clostridia;Clostridiales;Ruminococcaceae;Caproiciproducens;	3064	61	249	83	205	87	1	90	63	1	130	89	38	139	87	59	108	60	249	143	140	178	101	31	108	35	99	123	57	22	48	20	36	26	18	7	1	6	18	30	18	3064
Bacteria;Firmicutes;Clostridia;Clostridiales;Lachnospiraceae;Dorea;	2496	51	20	33	67	48	0	490	22	41	22	49	13	452	77	39	0	12	93	138	94	40	23	28	175	5	0	34	104	82	27	93	29	4	11	25	9	24	5	0	17	2496
Bacteria;Firmicutes;Clostridia;Clostridiales;Lachnospiraceae;Coprococcus_1;	2355	110	44	303	1	47	0	242	46	0	0	140	40	130	23	37	0	0	171	0	96	132	27	57	198	4	78	19	38	117	30	46	96	0	18	49	0	13	0	3	0	2355
Bacteria;Proteobacteria;Gammaproteobacteria;Pasteurellales;Pasteurellaceae;Pasteurellaceae_unclassified;	1868	86	1	0	0	1	0	0	357	7	543	25	42	1	82	167	0	66	13	0	4	180	2	5	5	0	1	19	10	62	4	73	100	2	0	0	1	0	1	6	2	1868
Bacteria;Proteobacteria;Deltaproteobacteria;Desulfovibrionales;Desulfovibrionaceae;Desulfovibrionaceae_unclassified;	1806	106	35	99	666	39	24	0	12	0	0	176	109	0	40	77	0	0	3	0	0	17	0	41	0	0	56	193	0	0	0	0	14	2	14	1	0	29	0	46	7	1806
Bacteria;Firmicutes;Clostridia;Clostridia_unclassified;Clostridia_unclassified;Clostridia_unclassified;	1794	416	60	233	136	101	0	0	96	0	0	48	26	0	10	56	0	0	0	0	220	61	0	37	131	0	0	64	36	0	0	0	0	22	19	0	0	0	0	3	19	1794
Bacteria;Bacteroidetes;Bacteroidia;Bacteroidia_unclassified;Bacteroidia_unclassified;Bacteroidia_unclassified;	1727	1	19	233	0	204	0	0	470	4	1	6	0	0	0	159	0	0	0	0	0	157	0	205	0	0	48	51	0	0	0	2	83	1	42	24	0	0	0	17	0	1727
Bacteria;Actinobacteria;Coriobacteriia;Coriobacteriales;Coriobacteriales_unclassified;Coriobacteriales_unclassified;	1662	1	5	138	0	48	0	36	20	0	0	49	15	0	81	86	27	0	282	6	106	0	0	104	340	5	0	198	25	0	0	0	38	21	11	14	0	6	0	0	0	1662
Bacteria;Firmicutes;Clostridia;Clostridiales;Christensenellaceae;uncultured;	1574	14	14	1200	21	34	0	31	8	1	0	44	3	0	4	24	11	13	6	6	14	18	5	9	41	2	7	6	1	0	3	0	14	6	3	4	0	2	2	2	1	1574
Bacteria;Firmicutes;Clostridia;Clostridiales;Lachnospiraceae;Tyzzerella_3;	1555	0	0	0	146	0	0	11	0	0	0	0	0	433	0	17	0	0	209	0	0	0	116	0	0	0	60	0	45	312	110	0	61	0	35	0	0	0	0	0	0	1555
Bacteria;Firmicutes;Bacilli;Lactobacillales;Lactobacillaceae;Lactobacillus;	1498	2	6	27	16	650	73	8	13	0	4	9	9	2	13	18	11	31	4	0	76	9	3	49	12	5	27	376	8	5	7	12	4	4	0	1	1	1	1	1	0	1498
Bacteria;Firmicutes;Clostridia;Clostridiales;Ruminococcaceae;Hydrogenoanaerobacterium;	1164	51	14	59	269	36	0	5	13	0	16	34	1	0	9	25	31	1	4	46	67	15	4	5	24	48	282	13	15	6	33	10	5	10	0	2	0	1	7	1	2	1164
Bacteria;Firmicutes;Negativicutes;Selenomonadales;Veillonellaceae;Megasphaera;	1053	0	0	0	0	147	630	63	4	0	142	0	0	1	4	0	0	5	2	0	0	1	0	4	2	0	0	0	0	0	0	0	0	0	0	0	0	0	48	0	0	1053
Bacteria;Firmicutes;Clostridia;Clostridiales;Family_XIII;Anaerovorax;	1025	10	149	2	1	1	0	427	64	0	0	8	0	0	5	2	1	0	0	0	0	10	0	74	185	13	3	51	2	0	0	0	1	0	2	12	0	0	0	2	0	1025
Bacteria;Firmicutes;Erysipelotrichia;Erysipelotrichales;Erysipelotrichaceae;Turicibacter;	999	26	168	0	0	1	1	1	3	90	0	501	29	0	0	1	5	0	0	1	82	3	1	1	44	0	6	13	5	0	1	15	0	0	0	0	0	0	0	0	1	999
Bacteria;Firmicutes;Erysipelotrichia;Erysipelotrichales;Erysipelotrichaceae;Erysipelatoclostridium;	938	0	0	111	54	1	5	34	0	21	50	210	21	5	0	55	41	52	37	18	0	32	11	1	0	3	7	43	35	30	4	29	5	3	1	0	1	9	0	0	9	938
Bacteria;Verrucomicrobia;Verrucomicrobiae;Opitutales;Puniceicoccaceae;Puniceicoccaceae_ge;	553	196	190	3	0	0	0	0	0	0	0	0	0	0	0	67	0	0	0	0	0	0	0	8	1	0	0	85	0	0	0	0	0	2	1	0	0	0	0	0	0	553
Bacteria;Firmicutes;Clostridia;Clostridiales;Family_XIII;Family_XIII_AD3011_group;	439	9	3	30	4	8	0	98	9	0	0	27	10	5	8	4	2	10	13	12	19	19	16	3	52	7	7	3	8	7	2	3	2	15	4	14	0	3	1	1	1	439
Bacteria;Proteobacteria;Gammaproteobacteria;Enterobacteriales;Enterobacteriaceae;Citrobacter;	405	0	2	0	0	0	14	0	0	0	0	0	0	0	0	0	0	0	0	0	0	0	0	0	380	0	1	0	0	0	8	0	0	0	0	0	0	0	0	0	0	405
Bacteria;Firmicutes;Erysipelotrichia;Erysipelotrichales;Erysipelotrichaceae;Catenibacterium;	385	0	0	0	0	0	0	0	149	0	0	0	0	0	0	0	0	0	0	0	219	0	0	0	17	0	0	0	0	0	0	0	0	0	0	0	0	0	0	0	0	385
Bacteria;Firmicutes;Bacilli;Lactobacillales;Enterococcaceae;Enterococcus;	364	1	0	0	24	0	146	0	0	0	5	0	15	0	23	1	63	1	0	0	0	13	11	0	0	1	3	15	41	1	0	0	0	0	0	0	0	0	0	0	0	364
Bacteria;Synergistetes;Synergistia;Synergistales;Synergistaceae;Synergistaceae_unclassified;	315	5	0	0	213	0	0	6	0	0	0	0	0	0	1	3	0	0	1	0	0	0	0	14	70	0	0	0	0	0	0	0	0	0	1	0	0	0	0	1	0	315
Bacteria;Proteobacteria;Alphaproteobacteria;Rickettsiales;Mitochondria;Mitochondria_ge;	294	2	4	2	157	0	0	0	3	0	0	0	0	0	1	1	1	4	52	0	3	0	2	2	3	0	0	53	0	0	0	0	0	0	1	2	0	0	1	0	0	294
Bacteria;Firmicutes;Clostridia;Clostridiales;Clostridiaceae_1;Clostridium_sensu_stricto_1;	260	20	26	0	0	6	70	0	0	13	0	0	11	0	2	0	0	0	0	0	8	20	0	1	54	0	2	3	2	0	0	1	0	0	0	0	0	0	0	21	0	260
Bacteria;Firmicutes;Clostridia;Clostridiales;Ruminococcaceae;uncultured;	247	121	0	0	39	1	0	0	0	0	0	0	0	0	0	44	0	0	0	0	0	0	0	12	25	0	0	0	0	0	0	0	0	1	0	4	0	0	0	0	0	247
Bacteria;Proteobacteria;Gammaproteobacteria;Enterobacteriales;Enterobacteriaceae;Proteus;	229	0	0	0	0	0	5	0	0	0	222	0	0	0	0	0	0	0	0	0	0	2	0	0	0	0	0	0	0	0	0	0	0	0	0	0	0	0	0	0	0	229
Bacteria;Firmicutes;Clostridia;Clostridiales;Peptococcaceae;Peptococcaceae_unclassified;	221	55	1	32	60	3	0	0	0	0	0	28	0	0	0	0	0	2	0	0	24	0	0	0	0	6	0	1	0	0	0	0	0	0	0	7	0	0	0	2	0	221
Bacteria;Firmicutes;Clostridia;Clostridiales;Family_XIII;Family_XIII_ge;	194	0	0	27	30	25	0	0	0	4	0	15	4	0	0	6	2	7	1	0	7	6	0	0	1	0	16	0	1	0	0	0	0	37	0	2	0	0	1	1	1	194
Bacteria;Fusobacteria;Fusobacteriia;Fusobacteriales;Fusobacteriaceae;Fusobacterium;	182	0	0	0	5	0	43	0	2	0	86	0	0	7	0	1	0	1	0	0	0	7	0	0	21	0	0	0	0	0	0	1	2	0	0	0	0	0	0	0	6	182
Bacteria;Actinobacteria;Coriobacteriia;Coriobacteriales;Atopobiaceae;Atopobiaceae_unclassified;	172	0	0	0	1	0	0	38	1	0	2	0	0	0	2	3	93	1	0	0	11	1	0	2	5	0	1	8	0	0	0	2	1	0	0	0	0	0	0	0	0	172
Bacteria;Patescibacteria;Saccharimonadia;Saccharimonadales;Saccharimonadaceae;Saccharimonadaceae_ge;	155	1	1	3	18	1	0	26	28	0	0	8	8	13	0	2	0	3	2	3	4	5	0	10	7	0	0	0	4	4	0	0	2	0	1	0	0	0	0	0	1	155
Bacteria;Epsilonbacteraeota;Campylobacteria;Campylobacterales;Campylobacteraceae;Campylobacter;	153	0	0	0	0	0	0	0	1	0	125	0	1	0	0	0	0	1	0	1	0	5	0	1	1	0	0	0	5	4	0	4	3	0	0	0	0	0	0	1	0	153
Bacteria;Firmicutes;Clostridia;Clostridiales;Lachnospiraceae;Howardella;	137	0	25	0	0	0	0	0	0	0	0	0	0	0	0	0	0	0	0	0	0	0	0	0	98	0	0	14	0	0	0	0	0	0	0	0	0	0	0	0	0	137
Bacteria;Proteobacteria;Gammaproteobacteria;Pasteurellales;Pasteurellaceae;Haemophilus;	126	0	0	0	0	0	0	0	18	3	18	0	0	0	5	0	0	0	0	0	0	0	0	0	0	0	0	0	0	0	0	0	82	0	0	0	0	0	0	0	0	126
Bacteria;Actinobacteria;Actinobacteria;Actinomycetales;Actinomycetaceae;Actinomyces;	119	2	2	3	3	0	0	34	0	1	5	13	0	7	7	4	0	7	1	1	2	11	0	2	7	0	2	0	2	0	0	1	0	1	0	0	0	0	0	1	0	119
Bacteria;Firmicutes;Clostridia;Clostridiales;Ruminococcaceae;Ruminococcaceae_UCG-008;	99	0	3	0	0	0	0	83	0	0	0	0	0	0	0	0	0	0	0	0	0	0	0	1	0	0	0	12	0	0	0	0	0	0	0	0	0	0	0	0	0	99
Bacteria;Firmicutes;Clostridia;Clostridiales;Lachnospiraceae;Lachnospiraceae_FCS020_group;	81	8	0	0	2	1	0	10	1	0	0	12	0	0	3	8	0	2	4	0	7	1	0	2	7	0	0	4	3	0	0	3	1	0	1	1	0	0	0	0	0	81
Bacteria;Firmicutes;Bacilli;Lactobacillales;Streptococcaceae;Lactococcus;	80	0	0	1	0	0	24	15	0	0	1	0	5	0	0	3	0	0	0	0	7	3	4	3	0	0	1	10	0	0	0	0	3	0	0	0	0	0	0	0	0	80
Bacteria;Firmicutes;Bacilli;Lactobacillales;Lactobacillales_unclassified;Lactobacillales_unclassified;	76	1	0	4	1	0	2	2	1	0	9	0	0	2	8	9	0	13	3	0	2	6	0	0	3	0	1	2	0	0	0	4	1	0	0	0	0	0	0	1	1	76
Bacteria;Actinobacteria;Actinobacteria;Micrococcales;Micrococcaceae;Rothia;	72	0	0	2	4	0	6	4	1	0	1	0	0	0	19	10	0	4	0	0	4	4	0	0	0	0	0	12	0	0	0	0	1	0	0	0	0	0	0	0	0	72
Bacteria;Bacteroidetes;Bacteroidia;Bacteroidales;Prevotellaceae;Prevotella_1;	72	2	3	3	3	3	2	4	1	3	1	0	2	4	1	1	1	2	2	1	0	3	1	3	4	3	3	7	0	3	1	5	0	0	0	0	0	0	0	0	0	72
Bacteria;Firmicutes;Erysipelotrichia;Erysipelotrichales;Erysipelotrichaceae;Coprobacillus;	72	0	0	0	2	0	0	0	2	0	0	0	0	15	0	6	0	0	0	0	0	8	2	10	18	2	0	0	2	0	4	0	0	0	0	0	0	0	0	1	0	72
Bacteria;Firmicutes;Clostridia;Clostridiales;Lachnospiraceae;Epulopiscium;	68	0	13	0	0	0	0	0	0	0	0	0	0	0	0	0	0	0	0	0	22	0	0	0	29	0	0	0	4	0	0	0	0	0	0	0	0	0	0	0	0	68
Bacteria;Patescibacteria;Saccharimonadia;Saccharimonadales;Saccharimonadales_fa;Saccharimonadales_ge;	64	3	2	7	3	1	0	5	2	0	1	4	0	3	0	0	1	0	1	0	11	2	1	3	1	0	2	0	3	0	0	0	6	0	0	0	0	1	0	1	0	64
Bacteria;Firmicutes;Bacilli;Bacillales;Bacillales_unclassified;Bacillales_unclassified;	42	0	2	1	2	0	7	1	0	0	1	0	0	0	11	1	0	4	0	0	0	0	0	0	6	0	0	1	2	0	0	0	2	0	0	0	0	0	1	0	0	42
Bacteria;Firmicutes;Clostridia;Clostridiales;Lachnospiraceae;Anaerostipes;	41	0	0	0	0	0	0	0	0	0	4	0	0	0	0	0	0	3	0	15	0	0	1	0	0	0	1	0	0	7	0	4	0	0	0	0	0	0	0	0	6	41
Bacteria;Bacteroidetes;Bacteroidia;Bacteroidales;Prevotellaceae;Prevotella_6;	39	0	0	0	0	0	0	0	0	0	0	0	0	0	0	0	0	0	0	0	0	0	0	0	38	0	0	0	0	0	0	0	0	1	0	0	0	0	0	0	0	39
Bacteria;Firmicutes;Clostridia;Clostridiales;Peptococcaceae;Peptococcus;	39	0	0	0	0	0	1	1	1	0	1	20	1	0	4	5	0	0	0	0	0	0	0	1	0	3	0	1	0	0	0	0	0	0	0	0	0	0	0	0	0	39
Bacteria;Firmicutes;Clostridia;Clostridiales;Ruminococcaceae;Acetivibrio;	39	30	0	0	0	4	0	0	5	0	0	0	0	0	0	0	0	0	0	0	0	0	0	0	0	0	0	0	0	0	0	0	0	0	0	0	0	0	0	0	0	39
Bacteria;Proteobacteria;Gammaproteobacteria;Pseudomonadales;Pseudomonadaceae;Pseudomonas;	39	0	0	0	0	0	0	0	3	0	0	0	0	0	0	7	0	0	2	0	0	17	0	9	0	0	0	0	0	0	0	0	1	0	0	0	0	0	0	0	0	39
Bacteria;Firmicutes;Negativicutes;Selenomonadales;Veillonellaceae;Selenomonas_3;	36	0	0	0	0	0	0	0	0	0	30	0	0	0	0	0	0	0	0	0	0	0	0	0	0	0	0	0	0	1	0	4	0	0	0	0	0	1	0	0	0	36
Bacteria;Tenericutes;Mollicutes;Mollicutes_RF39;Mollicutes_RF39_fa;Mollicutes_RF39_ge;	35	0	8	5	0	0	0	0	0	4	0	0	0	0	0	0	0	0	18	0	0	0	0	0	0	0	0	0	0	0	0	0	0	0	0	0	0	0	0	0	0	35
Bacteria;Proteobacteria;Gammaproteobacteria;Gammaproteobacteria_unclassified;Gammaproteobacteria_unclassified;Gammaproteobacteria_unclassified;	28	0	0	0	0	0	0	0	0	0	0	0	0	0	0	28	0	0	0	0	0	0	0	0	0	0	0	0	0	0	0	0	0	0	0	0	0	0	0	0	0	28
Bacteria;Firmicutes;Bacilli;Lactobacillales;Leuconostocaceae;Leuconostoc;	27	0	0	1	0	0	0	1	0	0	0	0	0	0	16	0	1	0	1	0	0	1	2	0	1	0	0	3	0	0	0	0	0	0	0	0	0	0	0	0	0	27
Bacteria;Firmicutes;Clostridia;Clostridiales;Eubacteriaceae;Eubacteriaceae_unclassified;	27	0	0	0	0	3	0	0	0	0	0	0	0	0	0	0	0	15	0	7	0	0	0	0	0	0	0	0	2	0	0	0	0	0	0	0	0	0	0	0	0	27
Bacteria;Cyanobacteria;Melainabacteria;Gastranaerophilales;Gastranaerophilales_fa;Gastranaerophilales_ge;	23	0	0	0	0	0	0	0	0	0	0	0	0	0	0	0	0	0	23	0	0	0	0	0	0	0	0	0	0	0	0	0	0	0	0	0	0	0	0	0	0	23
Bacteria;Synergistetes;Synergistia;Synergistales;Synergistaceae;uncultured;	22	0	0	0	0	0	0	0	0	2	0	0	0	0	0	0	0	0	0	0	0	0	0	16	0	0	0	0	0	0	0	0	0	0	4	0	0	0	0	0	0	22
Bacteria;Firmicutes;Clostridia;Clostridiales;Clostridiaceae_1;Sarcina;	19	0	1	0	0	10	0	0	0	0	0	0	0	0	0	4	0	0	0	0	0	0	0	0	0	1	0	0	0	0	0	0	0	3	0	0	0	0	0	0	0	19
Bacteria;Proteobacteria;Gammaproteobacteria;Betaproteobacteriales;Burkholderiaceae;Comamonas;	19	0	0	0	0	0	0	0	19	0	0	0	0	0	0	0	0	0	0	0	0	0	0	0	0	0	0	0	0	0	0	0	0	0	0	0	0	0	0	0	0	19
Bacteria;Firmicutes;Bacilli;Lactobacillales;Leuconostocaceae;Weissella;	18	0	0	0	1	0	0	0	0	0	0	0	0	0	0	0	0	3	0	0	0	1	7	0	0	0	1	0	0	0	5	0	0	0	0	0	0	0	0	0	0	18
Bacteria;Proteobacteria;Gammaproteobacteria;Enterobacteriales;Enterobacteriaceae;Morganella;	18	0	0	0	0	0	5	0	4	0	0	0	0	0	0	4	0	0	0	0	0	2	0	0	0	0	0	0	0	1	0	0	0	0	0	0	0	2	0	0	0	18
Bacteria;Firmicutes;Clostridia;Clostridiales;Peptostreptococcaceae;Peptostreptococcus;	17	0	0	0	0	0	0	0	0	0	2	0	0	0	0	0	0	0	0	0	0	1	0	0	13	0	0	0	0	0	0	0	1	0	0	0	0	0	0	0	0	17
Bacteria;Firmicutes;Clostridia;Clostridiales;Ruminococcaceae;Ethanoligenens;	17	1	0	0	0	10	0	0	3	0	0	0	0	0	0	0	0	0	0	0	0	0	0	0	0	0	0	0	0	0	0	0	1	2	0	0	0	0	0	0	0	17
Bacteria;Firmicutes;Clostridia;Clostridiales;Family_XI;Parvimonas;	16	0	0	0	0	0	0	0	0	0	0	0	0	1	0	3	0	0	1	0	0	6	0	0	4	0	0	1	0	0	0	0	0	0	0	0	0	0	0	0	0	16
Bacteria;Firmicutes;Clostridia;Clostridiales;Syntrophomonadaceae;Syntrophomonas;	16	0	0	8	0	0	0	0	6	0	0	0	0	0	0	0	0	0	0	0	0	0	0	0	0	0	0	2	0	0	0	0	0	0	0	0	0	0	0	0	0	16
Bacteria;Firmicutes;Clostridia;Clostridiales;Clostridiaceae_1;Clostridium_sensu_stricto_13;	15	0	0	0	0	0	0	0	0	0	0	0	0	0	0	0	0	0	0	0	13	0	0	0	0	0	0	0	2	0	0	0	0	0	0	0	0	0	0	0	0	15
Bacteria;Actinobacteria;Actinobacteria;Corynebacteriales;Corynebacteriaceae;Corynebacterium_1;	13	0	0	0	0	0	0	0	0	0	0	0	1	0	0	0	0	0	0	0	0	0	0	0	0	0	0	12	0	0	0	0	0	0	0	0	0	0	0	0	0	13
Bacteria;Actinobacteria;Actinobacteria_unclassified;Actinobacteria_unclassified;Actinobacteria_unclassified;Actinobacteria_unclassified;	13	0	0	0	0	0	0	0	0	0	0	0	0	0	0	0	0	0	0	0	1	0	0	12	0	0	0	0	0	0	0	0	0	0	0	0	0	0	0	0	0	13
Bacteria;Firmicutes;Erysipelotrichia;Erysipelotrichales;Erysipelotrichaceae;Solobacterium;	13	0	0	3	1	0	0	2	2	0	0	1	0	0	0	0	0	1	0	0	1	0	0	0	2	0	0	0	0	0	0	0	0	0	0	0	0	0	0	0	0	13
Bacteria;Firmicutes;Bacilli;Bacillales;Staphylococcaceae;Staphylococcus;	11	0	0	0	0	0	0	0	0	0	0	0	0	0	0	1	0	0	0	0	0	0	0	0	0	0	0	10	0	0	0	0	0	0	0	0	0	0	0	0	0	11
Bacteria;Firmicutes;Bacilli;Lactobacillales;Carnobacteriaceae;Carnobacterium;	10	0	0	0	0	0	0	0	0	0	5	0	0	0	5	0	0	0	0	0	0	0	0	0	0	0	0	0	0	0	0	0	0	0	0	0	0	0	0	0	0	10
Bacteria;Firmicutes;Clostridia;Clostridiales;Lachnospiraceae;Oribacterium;	10	0	0	2	0	0	0	0	0	0	2	0	0	2	0	1	0	0	0	0	0	1	0	0	1	0	0	0	1	0	0	0	0	0	0	0	0	0	0	0	0	10
Bacteria;Proteobacteria;Gammaproteobacteria;Betaproteobacteriales;Neisseriaceae;Neisseria;	10	1	0	0	0	0	2	0	0	0	0	0	0	0	0	0	0	4	0	0	0	0	0	0	0	0	0	0	0	3	0	0	0	0	0	0	0	0	0	0	0	10
Bacteria;Firmicutes;Clostridia;Clostridiales;Lachnospiraceae;Stomatobaculum;	9	0	0	0	0	0	0	3	0	0	0	0	0	1	1	0	0	0	0	1	0	2	0	0	0	0	0	0	0	0	0	1	0	0	0	0	0	0	0	0	0	9
Bacteria;Proteobacteria;Gammaproteobacteria;Enterobacteriales;Enterobacteriaceae;Providencia;	9	0	0	0	0	3	1	0	1	0	0	0	3	0	0	0	0	0	0	0	0	0	0	0	0	0	0	0	0	0	0	1	0	0	0	0	0	0	0	0	0	9
Bacteria;Proteobacteria;Gammaproteobacteria;Pseudomonadales;Moraxellaceae;Acinetobacter;	8	0	0	0	0	0	0	0	2	0	2	0	0	0	0	0	0	0	0	0	0	0	0	0	0	0	0	4	0	0	0	0	0	0	0	0	0	0	0	0	0	8
Bacteria;Bacteroidetes;Bacteroidia;Flavobacteriales;Flavobacteriaceae;Flavobacterium;	7	0	0	0	0	0	0	7	0	0	0	0	0	0	0	0	0	0	0	0	0	0	0	0	0	0	0	0	0	0	0	0	0	0	0	0	0	0	0	0	0	7
Bacteria;Patescibacteria;Saccharimonadia;Saccharimonadales;Saccharimonadales_unclassified;Saccharimonadales_unclassified;	7	0	0	0	1	1	0	2	0	0	0	1	1	0	0	0	0	0	0	0	0	0	0	0	0	0	0	0	1	0	0	0	0	0	0	0	0	0	0	0	0	7
Bacteria;Proteobacteria;Alphaproteobacteria;Sphingomonadales;Sphingomonadaceae;Sphingorhabdus;	6	0	2	0	0	0	2	0	0	0	0	0	0	0	0	0	0	0	0	0	0	0	0	0	1	0	0	0	0	0	1	0	0	0	0	0	0	0	0	0	0	6
Bacteria;Proteobacteria;Gammaproteobacteria;Betaproteobacteriales;Burkholderiaceae;Rhodoferax;	6	0	0	0	1	0	2	0	0	0	1	0	0	0	0	0	0	0	0	0	0	0	1	0	0	0	0	0	0	0	0	1	0	0	0	0	0	0	0	0	0	6
Bacteria;Firmicutes;Clostridia;Clostridiales;Family_XI;Finegoldia;	5	0	0	0	0	0	0	0	0	0	0	0	0	3	0	0	0	0	0	0	0	0	0	0	2	0	0	0	0	0	0	0	0	0	0	0	0	0	0	0	0	5
Bacteria;Actinobacteria;Actinobacteria;Bifidobacteriales;Bifidobacteriaceae;Bifidobacteriaceae_unclassified;	4	0	0	0	4	0	0	0	0	0	0	0	0	0	0	0	0	0	0	0	0	0	0	0	0	0	0	0	0	0	0	0	0	0	0	0	0	0	0	0	0	4
Bacteria;Firmicutes;Clostridia;Clostridiales;Family_XI;Peptoniphilus;	4	0	0	0	0	0	0	0	0	0	0	0	0	0	2	0	0	0	0	0	0	0	0	0	1	0	0	0	1	0	0	0	0	0	0	0	0	0	0	0	0	4
Bacteria;Firmicutes;Clostridia;Clostridiales;Lachnospiraceae;Coprococcus_3;	4	2	0	0	0	0	0	0	0	0	0	0	0	0	0	0	0	0	0	0	0	0	0	0	2	0	0	0	0	0	0	0	0	0	0	0	0	0	0	0	0	4
Bacteria;Firmicutes;Clostridia;Clostridiales;Peptostreptococcaceae;Terrisporobacter;	4	2	0	0	0	0	0	0	0	0	0	0	0	0	0	0	0	0	0	0	0	0	0	0	2	0	0	0	0	0	0	0	0	0	0	0	0	0	0	0	0	4
Bacteria;Proteobacteria;Gammaproteobacteria;Betaproteobacteriales;Nitrosomonadaceae;Ellin6067;	4	0	0	0	1	0	0	0	1	0	0	0	0	0	0	0	0	0	0	0	0	0	0	0	1	0	0	0	0	1	0	0	0	0	0	0	0	0	0	0	0	4
Bacteria;Bacteroidetes;Bacteroidia;Cytophagales;Spirosomaceae;Arcicella;	3	0	0	0	0	0	0	0	0	2	0	0	0	0	0	0	0	0	0	0	0	0	0	0	0	0	0	0	0	0	1	0	0	0	0	0	0	0	0	0	0	3
Bacteria;Patescibacteria;Gracilibacteria;JGI_0000069-P22;JGI_0000069-P22_fa;JGI_0000069-P22_ge;	3	0	0	0	0	0	0	0	3	0	0	0	0	0	0	0	0	0	0	0	0	0	0	0	0	0	0	0	0	0	0	0	0	0	0	0	0	0	0	0	0	3
Bacteria;Proteobacteria;Alphaproteobacteria;Caulobacterales;Caulobacteraceae;Brevundimonas;	3	0	0	0	0	0	0	3	0	0	0	0	0	0	0	0	0	0	0	0	0	0	0	0	0	0	0	0	0	0	0	0	0	0	0	0	0	0	0	0	0	3
Bacteria;Actinobacteria;Actinobacteria;Propionibacteriales;Propionibacteriaceae;Propionibacteriaceae_unclassified;	2	0	0	0	0	0	0	0	0	0	0	0	0	0	0	0	0	0	0	0	0	0	0	0	0	0	2	0	0	0	0	0	0	0	0	0	0	0	0	0	0	2
Bacteria;Bacteroidetes;Bacteroidia;Sphingobacteriales;env.OPS_17;env.OPS_17_ge;	2	0	0	0	0	0	0	0	0	0	0	0	0	0	0	0	0	0	2	0	0	0	0	0	0	0	0	0	0	0	0	0	0	0	0	0	0	0	0	0	0	2
Bacteria;Proteobacteria;Alphaproteobacteria;Rhizobiales;Beijerinckiaceae;Bosea;	2	0	0	0	0	0	0	2	0	0	0	0	0	0	0	0	0	0	0	0	0	0	0	0	0	0	0	0	0	0	0	0	0	0	0	0	0	0	0	0	0	2
Bacteria;Proteobacteria;Gammaproteobacteria;Pseudomonadales;Moraxellaceae;Psychrobacter;	2	0	0	0	0	0	0	0	0	0	2	0	0	0	0	0	0	0	0	0	0	0	0	0	0	0	0	0	0	0	0	0	0	0	0	0	0	0	0	0	0	2
Bacteria;Proteobacteria;Proteobacteria_unclassified;Proteobacteria_unclassified;Proteobacteria_unclassified;Proteobacteria_unclassified;	2	0	0	0	0	0	0	0	2	0	0	0	0	0	0	0	0	0	0	0	0	0	0	0	0	0	0	0	0	0	0	0	0	0	0	0	0	0	0	0	0	2

## Sheet: otus97-uparse_mac
taxonomy_mac	total	A003	A014	A018	A036	A042	A056	A063	A070	A080	A081	A093	A131	A139	A140	A147	A157	A160	A167	A169	A174	A181	A190	A215	A224	A235	A239	A243	A244	A258	A260	A262	C023	C035	C059	C072	C089	C114	C145	C146	C209
Root	3131211	140239	121375	137519	175970	51944	82193	96071	140844	24390	104645	106805	63627	35992	57125	74529	30246	54259	91241	99615	140191	110615	98282	113940	103575	27452	126046	125669	75251	86541	36409	153010	104022	12968	17084	28826	13331	15510	14373	14819	24668	3131211
Bacteria;Bacteroidetes;Bacteroidia;Bacteroidales;Bacteroidaceae;Bacteroides;	614987	5745	2646	30355	51723	8621	2884	1377	5966	5389	50713	11306	14829	71	7749	10900	9425	18515	12814	39634	8781	33770	29359	10609	10855	3960	26735	25185	24540	40837	13399	26540	22366	611	2464	3356	8081	6890	8230	4898	12859	614987
Bacteria;Bacteroidetes;Bacteroidia;Bacteroidales;Bacteroidales_unclassified;Bacteroidales_unclassified;	235052	6497	6150	11145	8830	8150	181	712	37631	1702	81	12071	4511	56	1220	5254	2885	1219	1298	6	11690	13384	5380	8029	5995	1386	2705	15550	2280	2299	299	46180	4495	485	1284	1030	319	1115	638	302	608	235052
Bacteria;Firmicutes;Clostridia;Clostridiales;Lachnospiraceae;Lachnospiraceae_unclassified;	218635	5148	6468	4783	8729	3817	19	5621	8419	2713	12162	8585	4462	7273	6388	6240	1563	4196	9151	16573	4799	3520	4334	9850	7581	971	7144	9353	4172	5055	1697	21465	5514	266	1426	3307	1193	1120	636	1178	1744	218635
Bacteria;Bacteroidetes;Bacteroidia;Bacteroidales;Rikenellaceae;Alistipes;	180480	12620	831	19659	21400	7127	5	205	10925	1069	4	7883	6002	13	1480	2948	2240	605	971	4277	11165	7620	7171	8372	5104	1585	11903	6996	2995	3	2059	2559	4202	1841	1437	1501	312	266	342	525	2258	180480
Bacteria;Firmicutes;Clostridia;Clostridiales;Ruminococcaceae;Faecalibacterium;	167429	7400	3169	3102	5360	3694	2	441	5815	2911	12	3037	4287	1595	4437	4105	778	4429	5941	3219	6976	10741	12208	8052	4653	3364	231	11299	3847	11978	2297	15803	5021	224	549	3683	608	0	884	1277	0	167429
Bacteria;Bacteroidetes;Bacteroidia;Bacteroidales;Prevotellaceae;Prevotella_7;	104706	32053	33757	4	3	3	19	872	0	0	0	0	3	3	9764	3	0	1	1	2	16947	2	1	2250	4383	427	2	0	1	0	0	0	0	0	1	4203	0	1	0	0	0	104706
Bacteria;Firmicutes;Clostridia;Clostridiales;Ruminococcaceae;Ruminococcaceae_ge;	101358	1536	2375	2888	1382	1003	24	39224	1150	691	1566	9828	947	1539	274	537	182	181	10676	1215	7466	1371	1107	577	7602	459	1326	644	182	133	239	591	191	440	848	235	74	250	20	361	24	101358
Bacteria;Firmicutes;Clostridia;Clostridiales;Ruminococcaceae;Ruminococcaceae_unclassified;	91914	3643	3031	2551	3660	1241	24	763	4944	596	538	5097	2571	236	2534	3859	741	1930	1476	2047	6227	4048	719	6318	6183	851	4546	4116	2460	860	1086	2338	3665	3237	1603	514	186	710	355	272	138	91914
Bacteria;Bacteria_unclassified;Bacteria_unclassified;Bacteria_unclassified;Bacteria_unclassified;Bacteria_unclassified;	79031	4784	5056	355	1797	178	27398	2	465	506	192	475	709	0	1216	1644	32	14	34	6	4699	529	149	2684	90	25	1084	5142	99	110	22	19	17770	12	345	1284	63	1	0	4	37	79031
Bacteria;Firmicutes;Clostridia;Clostridiales;Ruminococcaceae;Subdoligranulum;	73505	2354	881	5723	4	1454	0	3709	2530	48	1	4482	950	1078	1062	2511	1075	1147	2684	734	5256	3059	3776	886	3461	1428	4360	3140	1575	3610	372	2914	3735	0	765	616	193	253	336	283	1060	73505
Bacteria;Firmicutes;Clostridia;Clostridiales;Ruminococcaceae;CAG-352;	71122	569	425	3058	5593	634	15	12099	721	285	1047	3094	295	384	0	1140	719	736	579	2117	2313	1334	464	4284	2025	540	14655	539	2067	5874	1544	2	631	140	186	154	0	276	86	214	284	71122
Bacteria;Firmicutes;Clostridia;Clostridiales;Lachnospiraceae;uncultured;	63011	2106	1707	1169	1638	572	1	480	3207	1725	2223	1569	2219	1415	2417	2041	21	329	2780	4950	1156	334	2664	3006	1205	576	1758	7618	4974	206	635	893	2135	87	402	675	860	204	384	71	599	63011
Bacteria;Firmicutes;Clostridia;Clostridiales;Lachnospiraceae;Agathobacter;	61820	3636	1207	21	296	1816	1	458	787	408	2383	1339	3463	2004	507	986	165	8318	6975	344	1259	6090	830	696	641	125	5155	2358	4033	4	197	981	799	150	433	1039	88	574	702	518	34	61820
Bacteria;Firmicutes;Clostridia;Clostridiales;Ruminococcaceae;Ruminococcus_1;	57637	234	1938	12788	2367	921	0	34	469	1	3927	942	430	3	424	2796	3853	1153	3473	1783	3302	966	454	491	2543	131	775	3029	526	2	252	3	4752	142	521	273	3	313	11	1612	0	57637
Bacteria;Firmicutes;Clostridia;Clostridiales;Lachnospiraceae;Blautia;	55977	2264	519	2838	3175	222	53	4496	511	378	1314	1632	664	5257	677	430	720	996	1726	515	2503	2190	1932	1403	1349	284	4021	1218	995	4312	477	3685	646	155	347	395	248	505	190	106	629	55977
Bacteria;Proteobacteria;Alphaproteobacteria;Alphaproteobacteria_unclassified;Alphaproteobacteria_unclassified;Alphaproteobacteria_unclassified;	53025	6843	860	457	0	0	0	9	4072	1910	0	336	793	15	974	4458	1	0	4	2515	1	0	184	9327	118	13	207	4047	2277	0	1464	0	10494	12	0	21	0	83	0	0	1530	53025
Bacteria;Firmicutes;Clostridia;Clostridiales;Ruminococcaceae;Ruminococcaceae_UCG-002;	47029	2561	827	2585	1775	1228	0	1151	3727	1	0	1123	749	2	1131	430	184	77	507	768	4197	2426	182	2355	6234	832	3924	426	2026	23	1784	834	774	175	506	1127	16	259	34	69	0	47029
Bacteria;Verrucomicrobia;Verrucomicrobiae;Verrucomicrobiales;Verrucomicrobiaceae;uncultured;	44153	777	19	129	7209	10	17414	0	2211	4	2	797	256	140	38	634	0	187	2693	178	617	2	2	32	1629	70	6496	8	930	49	36	3	983	1	164	2	0	350	0	0	81	44153
Bacteria;Firmicutes;Clostridia;Clostridiales;Ruminococcaceae;Ruminococcaceae_UCG-014;	39519	3111	2345	4793	81	18	2	1124	2895	83	1	4115	365	2	547	2018	3	30	183	0	2662	45	1735	2832	4614	1128	2117	1215	850	7	208	2	2	22	355	0	0	8	0	0	1	39519
Bacteria;Bacteroidetes;Bacteroidia;Bacteroidales;Tannerellaceae;Tannerellaceae_unclassified;	37811	6	4157	2614	10210	636	0	132	3602	51	0	0	1255	21	143	478	404	1	400	0	1940	712	2535	573	330	296	1897	2	1294	0	184	1	2651	113	190	105	0	632	0	246	0	37811
Bacteria;Bacteroidetes;Bacteroidia;Bacteroidales;Tannerellaceae;Parabacteroides;	37378	1631	111	1959	1	682	1351	65	172	602	0	1656	645	8	333	907	653	1066	264	1797	914	1579	3805	1667	271	60	3261	1450	509	2767	945	3791	1080	50	70	69	0	161	111	285	630	37378
Bacteria;Firmicutes;Clostridia;Clostridiales;Clostridiales_unclassified;Clostridiales_unclassified;	36568	2369	874	685	327	1142	57	87	1704	11	7	161	2850	6	619	2422	9	12	3710	582	413	1276	5	2235	5418	145	103	5501	453	3	27	14	2576	604	47	40	0	1	10	12	51	36568
Bacteria;Firmicutes;Clostridia;Clostridiales;Lachnospiraceae;Fusicatenibacter;	35586	465	176	862	2648	356	2	345	1077	126	1357	856	623	731	149	2053	0	685	3510	5146	660	2259	3017	483	564	506	259	615	587	1	265	2452	812	324	341	376	253	0	139	136	370	35586
Bacteria;Proteobacteria;Gammaproteobacteria;Betaproteobacteriales;Burkholderiaceae;Burkholderiaceae_unclassified;	33218	5494	2036	112	300	15	0	94	3610	561	0	0	1423	205	1281	26	0	1	184	78	1038	3177	4868	3397	146	141	863	0	0	0	714	0	2958	29	44	0	0	362	5	56	0	33218
Bacteria;Firmicutes;Negativicutes;Selenomonadales;Acidaminococcaceae;Phascolarctobacterium;	32400	864	2145	2237	0	95	3176	90	1	514	0	9100	2378	0	0	84	13	0	2232	5515	577	28	0	291	1489	0	2	1	150	0	210	0	633	66	108	18	56	0	114	1	212	32400
Bacteria;Proteobacteria;Gammaproteobacteria;Betaproteobacteriales;Burkholderiaceae;Parasutterella;	30922	0	3	30	13201	740	3	0	0	0	0	2404	31	1	3	795	725	2066	581	0	93	0	793	4	12	0	1	757	699	1170	0	5877	0	13	59	319	120	0	0	35	387	30922
Bacteria;Bacteroidetes;Bacteroidia;Bacteroidales;Prevotellaceae;Prevotellaceae_unclassified;	27454	1569	1521	3	4	3	57	1424	9954	7	31	1	2	9	1756	896	1	2	2	1	4009	3	1	2849	465	196	3	1646	0	5	1	5	3	0	563	462	0	0	0	0	0	27454
Bacteria;Firmicutes;Clostridia;Clostridiales;Lachnospiraceae;Roseburia;	26189	774	448	378	17	99	0	223	960	79	3348	1073	333	86	146	423	42	2768	1167	1022	256	314	396	207	401	339	497	1483	3445	1	1333	1717	973	32	49	216	257	145	630	86	26	26189
Bacteria;Actinobacteria;Actinobacteria;Bifidobacteriales;Bifidobacteriaceae;Bifidobacterium;	24337	76	133	1320	514	671	16	2269	43	0	2889	1736	16	1157	21	442	882	170	4417	0	1440	2082	131	14	1004	0	1638	142	89	3	4	335	34	625	6	0	0	0	0	6	12	24337
Bacteria;Proteobacteria;Gammaproteobacteria;Enterobacteriales;Enterobacteriaceae;Escherichia-Shigella;	23134	1	2	180	139	16	2080	99	26	813	174	1628	1341	28	9	23	3	11	20	2	7455	262	0	30	203	39	20	235	1891	4342	1302	3	3	3	0	1	3	4	6	735	2	23134
Bacteria;Firmicutes;Erysipelotrichia;Erysipelotrichales;Erysipelotrichaceae;Erysipelotrichaceae_unclassified;	22752	156	98	883	182	30	0	7407	32	19	0	1464	472	3634	491	29	8	119	1495	926	28	321	472	222	390	63	1374	194	105	398	45	1454	91	13	13	35	67	8	4	10	0	22752
Bacteria;Firmicutes;Clostridia;Clostridiales;Ruminococcaceae;Ruminiclostridium_6;	21259	6480	203	101	1283	306	12	11	2649	0	0	923	0	1	312	0	0	0	1	0	19	1	0	6856	75	278	0	0	0	0	830	13	0	374	39	11	0	3	1	2	475	21259
Bacteria;Proteobacteria;Gammaproteobacteria;Enterobacteriales;Enterobacteriaceae;Enterobacteriaceae_unclassified;	18271	161	227	0	195	1	14322	1	28	2	236	1	5	0	629	7	0	21	1	0	0	0	1	599	54	1	14	129	0	0	647	1	408	0	0	0	0	0	0	580	0	18271
Bacteria;Firmicutes;Negativicutes;Selenomonadales;Veillonellaceae;Veillonella;	17725	29	4	11	10	414	2	50	88	51	15020	26	13	27	398	72	0	324	15	35	1	42	41	19	35	1	17	79	8	55	1	625	16	88	1	0	0	3	0	87	17	17725
Bacteria;Firmicutes;Negativicutes;Selenomonadales;Veillonellaceae;Dialister;	17596	1294	0	0	5614	133	91	0	287	0	223	0	0	0	486	0	3	0	0	0	0	579	132	313	1	821	5819	159	288	59	3	1249	0	1	0	0	0	40	1	0	0	17596
Bacteria;Bacteroidetes;Bacteroidia;Bacteroidia_unclassified;Bacteroidia_unclassified;Bacteroidia_unclassified;	17531	2	42	1962	3286	309	0	0	489	4	1	829	113	0	0	268	0	0	0	0	0	913	0	188	86	1	2827	4	815	2	0	4787	193	1	42	24	0	26	0	257	60	17531
Bacteria;Firmicutes;Bacilli;Lactobacillales;Streptococcaceae;Streptococcus;	16689	83	109	87	35	32	10133	156	78	18	639	16	41	56	2165	655	16	361	520	88	26	228	35	9	76	12	49	652	10	30	44	34	11	65	0	7	1	9	1	79	23	16689
Bacteria;Firmicutes;Clostridia;Clostridiales;Ruminococcaceae;Ruminococcaceae_UCG-005;	16397	1479	893	397	202	897	12	109	1292	6	1	323	449	15	318	818	8	19	59	148	1706	175	46	2230	1767	320	25	508	324	37	572	76	347	91	426	219	1	6	6	40	30	16397
Bacteria;Firmicutes;Clostridia;Clostridiales;Lachnospiraceae;Lachnoclostridium;	16351	984	251	301	141	225	0	2356	314	149	885	138	136	2070	669	215	3	17	503	191	1732	936	109	126	522	104	538	115	207	831	139	617	237	188	100	106	58	15	3	54	66	16351
Bacteria;Bacteroidetes;Bacteroidia;Bacteroidales;Prevotellaceae;Prevotellaceae_UCG-003;	15661	1703	455	0	1	240	0	41	3941	0	0	1	0	0	674	1183	350	2	2016	2	729	0	2509	1170	310	334	0	0	0	0	0	0	0	0	0	0	0	0	0	0	0	15661
Bacteria;Bacteroidetes;Bacteroidia;Bacteroidales;Marinifilaceae;Odoribacter;	14689	845	175	1433	704	205	0	73	1123	0	0	1470	745	0	218	312	170	0	106	410	1300	863	727	325	368	181	290	1314	558	2	126	0	172	6	12	80	111	119	0	80	66	14689
Bacteria;Firmicutes;Clostridia;Clostridiales;Lachnospiraceae;Lachnospiraceae_ge;	13718	231	367	640	889	60	0	1231	53	35	98	420	232	880	619	178	412	0	1180	0	508	235	592	124	367	538	452	179	511	0	41	138	166	70	273	1815	9	54	20	6	95	13718
Bacteria;Actinobacteria;Coriobacteriia;Coriobacteriales;Coriobacteriaceae;Collinsella;	13117	985	194	102	20	133	0	1636	83	2	0	81	0	1491	236	87	97	462	596	0	1444	546	253	90	2949	62	1165	138	135	0	7	33	43	28	10	1	0	0	5	3	0	13117
Bacteria;Firmicutes;Clostridia;Clostridiales;Ruminococcaceae;Ruminococcaceae_UCG-010;	12779	770	1874	1031	34	35	0	8	2063	0	0	261	223	0	173	112	13	35	1	66	1477	0	0	491	450	102	0	3207	3	0	25	0	247	28	31	4	0	0	0	15	0	12779
Bacteria;Firmicutes;Clostridia;Clostridiales;Christensenellaceae;Christensenellaceae_R-7_group;	12770	365	376	2387	98	226	0	32	320	48	0	832	35	0	416	381	35	6	790	345	1010	290	1	617	2256	294	231	735	20	0	2	90	286	32	158	50	0	0	1	2	3	12770
Bacteria;Bacteroidetes;Bacteroidia;Bacteroidales;Rikenellaceae;Rikenellaceae_RC9_gut_group;	11682	0	8499	1	0	1	0	1	3030	1	0	0	0	0	0	0	0	0	0	0	0	0	0	5	9	135	0	0	0	0	0	0	0	0	0	0	0	0	0	0	0	11682
Bacteria;Firmicutes;Clostridia;Clostridiales;Lachnospiraceae;Butyrivibrio;	10720	0	6908	0	0	0	0	0	15	4	7	4	8	0	2	0	0	5	0	3	0	0	0	2	312	3447	1	0	0	0	0	1	0	0	0	1	0	0	0	0	0	10720
Bacteria;Firmicutes;Clostridia;Clostridiales;Lachnospiraceae;Coprococcus_2;	9567	1355	703	1819	386	3	0	0	373	0	3	694	642	0	118	216	0	260	0	0	356	0	0	255	704	34	844	0	1	0	0	0	574	0	185	0	0	0	42	0	0	9567
Bacteria;Firmicutes;Clostridia;Clostridiales;Ruminococcaceae;Flavonifractor;	9390	328	93	343	700	58	1	133	152	69	1835	158	99	87	143	254	39	299	155	119	386	447	194	178	262	109	709	175	172	148	26	724	100	340	91	28	10	60	115	21	30	9390
Bacteria;Bacteroidetes;Bacteroidia;Bacteroidales;Prevotellaceae;Alloprevotella;	9299	1	6853	1	5	0	4	5	6	0	3	2	0	2	0	2	0	0	1	0	3	3	0	2383	3	0	3	2	0	3	3	4	3	3	0	0	0	0	0	1	0	9299
Bacteria;Firmicutes;Clostridia;Clostridiales;Christensenellaceae;Christensenellaceae_unclassified;	9041	248	62	2509	14	788	0	11	804	3	0	84	70	0	79	229	10	1	5	2	2353	96	0	298	902	257	45	106	6	0	1	0	0	2	37	2	0	0	7	4	6	9041
Bacteria;Proteobacteria;Deltaproteobacteria;Desulfovibrionales;Desulfovibrionaceae;Bilophila;	8381	391	56	97	2980	35	156	6	464	55	0	0	63	10	142	336	139	147	27	418	272	74	592	155	62	4	285	146	258	266	265	0	106	21	88	83	41	49	43	23	26	8381
Bacteria;Proteobacteria;Deltaproteobacteria;Desulfovibrionales;Desulfovibrionaceae;Desulfovibrio;	7758	142	327	551	1146	196	38	280	44	0	0	176	7	0	165	423	0	0	226	0	502	117	0	706	132	0	335	193	657	0	9	1	14	1149	14	192	0	0	0	9	7	7758
Bacteria;Firmicutes;Negativicutes;Selenomonadales;Acidaminococcaceae;Acidaminococcaceae_unclassified;	7389	0	1	0	0	370	0	110	0	0	0	0	0	123	2	2953	1007	436	0	0	0	0	2065	0	0	0	0	0	0	0	0	0	0	45	0	195	0	0	25	57	0	7389
Bacteria;Tenericutes;Mollicutes;Mollicutes_unclassified;Mollicutes_unclassified;Mollicutes_unclassified;	7032	0	3189	92	305	0	0	1	2816	1	0	1	0	0	21	1	1	2	0	0	1	1	0	591	2	0	0	1	0	2	2	1	0	0	0	0	0	0	0	0	1	7032
Bacteria;Actinobacteria;Coriobacteriia;Coriobacteriales;Eggerthellaceae;Eggerthella;	5834	388	65	275	111	26	0	989	38	24	71	174	27	1498	99	66	49	31	62	81	233	44	109	101	655	43	110	43	80	98	5	182	8	28	7	5	1	8	0	0	0	5834
Bacteria;Firmicutes;Clostridia;Clostridiales;Peptostreptococcaceae;Peptostreptococcaceae_unclassified;	5766	303	569	17	110	47	11	160	209	205	127	3	131	2	24	67	10	82	41	72	128	218	0	7	1001	7	172	135	65	1	3	1708	108	18	0	0	4	0	1	0	0	5766
Bacteria;Firmicutes;Clostridia;Clostridiales;Ruminococcaceae;Butyricicoccus;	5495	87	24	252	251	104	0	174	24	43	59	251	74	643	237	78	49	109	681	282	280	74	43	36	40	48	75	118	129	123	51	693	47	26	56	52	20	37	79	33	13	5495
Bacteria;Firmicutes;Firmicutes_unclassified;Firmicutes_unclassified;Firmicutes_unclassified;Firmicutes_unclassified;	5402	1428	54	1069	223	502	5	16	665	7	0	38	4	3	53	151	12	22	0	3	643	9	49	42	41	4	18	178	3	7	10	0	0	56	4	71	0	0	6	2	4	5402
Bacteria;Firmicutes;Clostridia;Clostridiales;Lachnospiraceae;Tyzzerella;	5345	161	30	90	17	13	0	13	50	14	0	400	21	18	202	269	0	139	279	871	82	85	386	530	46	117	318	405	211	122	80	27	126	20	15	46	23	84	2	4	29	5345
Bacteria;Firmicutes;Clostridia;Clostridiales;Ruminococcaceae;Ruminococcaceae_NK4A214_group;	5064	68	122	368	1177	85	16	102	95	0	0	252	15	0	48	190	14	0	20	0	170	98	0	148	187	14	699	125	131	0	45	0	105	95	119	508	0	0	4	7	37	5064
Bacteria;Firmicutes;Clostridia;Clostridiales;Ruminococcaceae;Oscillospira;	4167	140	156	46	66	8	0	5	486	96	1	62	10	0	35	21	5	3	135	0	3	2	1276	161	23	78	1	362	48	0	22	419	152	17	43	103	24	87	43	26	2	4167
Bacteria;Bacteroidetes;Bacteroidia;Bacteroidales;Muribaculaceae;Muribaculaceae_ge;	3912	3	317	434	2	3	2	2	4	2	2	1	0	9	2	2257	0	0	4	3	1	1	7	511	19	3	3	3	1	4	7	5	4	0	0	0	0	295	0	1	0	3912
Bacteria;Cyanobacteria;Oxyphotobacteria;Chloroplast;Chloroplast_fa;Chloroplast_ge;	3755	2	9	2	1849	0	5	0	5	7	7	0	1	6	10	28	1	109	623	7	38	0	12	46	2	0	2	853	1	2	2	2	0	33	52	26	1	9	1	0	2	3755
Bacteria;Firmicutes;Clostridia;Clostridiales;Clostridiaceae_1;Clostridiaceae_1_unclassified;	3548	331	802	32	4	17	14	77	50	130	10	1	108	0	2	24	0	17	1	4	83	84	26	7	429	7	19	322	49	0	20	757	0	100	3	0	14	0	1	3	0	3548
Bacteria;Firmicutes;Negativicutes;Selenomonadales;Veillonellaceae;Veillonellaceae_unclassified;	3519	0	17	0	8	0	34	22	2	0	1	0	0	854	0	244	0	0	0	0	2309	3	0	3	2	0	2	0	0	5	0	0	13	0	0	0	0	0	0	0	0	3519
Bacteria;Firmicutes;Erysipelotrichia;Erysipelotrichales;Erysipelotrichaceae;Faecalitalea;	3501	826	248	36	46	1	10	1335	0	13	14	7	60	3	61	18	3	18	2	43	126	73	5	1	322	0	19	114	30	18	3	19	8	0	1	4	0	12	1	0	1	3501
Bacteria;Firmicutes;Clostridia;Clostridiales;Family_XIII;Family_XIII_unclassified;	3294	91	58	101	73	31	784	159	72	5	0	47	19	0	11	41	68	23	36	28	68	61	39	32	90	8	1197	47	11	8	4	15	10	16	11	9	0	2	6	2	11	3294
Bacteria;Firmicutes;Clostridia;Clostridiales;Ruminococcaceae;Caproiciproducens;	3111	55	347	92	187	42	1	90	53	4	128	88	38	139	85	46	109	65	251	171	141	180	108	30	90	36	107	124	54	22	48	20	35	26	21	4	1	8	19	28	18	3111
Bacteria;Firmicutes;Clostridia;Clostridiales;Lachnospiraceae;Dorea;	2496	51	20	33	67	48	0	490	22	41	22	49	13	452	77	39	0	12	93	138	94	40	23	28	175	5	0	34	104	82	27	93	29	4	11	25	9	24	5	0	17	2496
Bacteria;Firmicutes;Clostridia;Clostridiales;Lachnospiraceae;Coprococcus_1;	2355	110	44	303	1	47	0	242	46	0	0	140	40	130	23	37	0	0	171	0	96	132	27	57	198	4	78	19	38	117	30	46	96	0	18	49	0	13	0	3	0	2355
Bacteria;Proteobacteria;Gammaproteobacteria;Pasteurellales;Pasteurellaceae;Pasteurellaceae_unclassified;	1868	86	1	0	0	1	0	0	357	7	543	25	42	1	82	167	0	66	13	0	4	180	2	5	5	0	1	19	10	62	4	73	100	2	0	0	1	0	1	6	2	1868
Bacteria;Firmicutes;Clostridia;Clostridiales;Ruminococcaceae;Hydrogenoanaerobacterium;	1750	78	30	91	280	66	0	6	54	0	16	39	3	0	25	33	37	17	13	61	172	64	16	28	75	56	325	22	21	7	32	10	34	11	6	0	0	2	12	3	5	1750
Bacteria;Firmicutes;Clostridia;Clostridia_unclassified;Clostridia_unclassified;Clostridia_unclassified;	1684	414	59	233	136	101	0	0	96	0	0	48	26	0	10	56	0	0	0	0	213	61	0	34	43	0	0	55	36	0	0	0	0	22	19	0	0	0	0	3	19	1684
Bacteria;Actinobacteria;Coriobacteriia;Coriobacteriales;Coriobacteriales_unclassified;Coriobacteriales_unclassified;	1651	1	5	138	0	48	0	8	20	0	0	49	15	0	81	81	35	0	282	6	116	0	0	104	343	5	1	198	25	0	0	0	38	21	11	14	0	6	0	0	0	1651
Bacteria;Firmicutes;Clostridia;Clostridiales;Lachnospiraceae;Tyzzerella_3;	1553	0	0	0	146	0	0	11	0	0	0	0	0	433	0	17	0	0	207	0	0	0	116	0	0	0	60	0	45	312	110	0	61	0	35	0	0	0	0	0	0	1553
Bacteria;Firmicutes;Bacilli;Lactobacillales;Lactobacillaceae;Lactobacillus;	1498	2	6	27	16	650	73	8	13	0	4	9	9	2	13	18	11	31	4	0	76	9	3	49	12	5	27	376	8	5	7	12	4	4	0	1	1	1	1	1	0	1498
Bacteria;Firmicutes;Negativicutes;Selenomonadales;Veillonellaceae;Megasphaera;	1053	0	0	0	0	147	630	63	4	0	142	0	0	1	4	0	0	5	2	0	0	1	0	4	2	0	0	0	0	0	0	0	0	0	0	0	0	0	48	0	0	1053
Bacteria;Firmicutes;Clostridia;Clostridiales;Family_XIII;Anaerovorax;	1006	10	149	1	0	0	0	427	64	0	0	8	0	0	5	0	1	0	0	0	0	10	0	74	180	13	1	46	0	0	0	0	1	0	2	12	0	0	0	2	0	1006
Bacteria;Firmicutes;Erysipelotrichia;Erysipelotrichales;Erysipelotrichaceae;Turicibacter;	999	26	168	0	0	1	1	1	3	90	0	501	29	0	0	1	5	0	0	1	82	3	1	1	44	0	6	13	5	0	1	15	0	0	0	0	0	0	0	0	1	999
Bacteria;Firmicutes;Erysipelotrichia;Erysipelotrichales;Erysipelotrichaceae;Erysipelatoclostridium;	938	0	0	111	54	1	5	34	0	21	50	210	21	5	0	55	41	52	37	18	0	32	11	1	0	3	7	43	35	30	4	29	5	3	1	0	1	9	0	0	9	938
Bacteria;Verrucomicrobia;Verrucomicrobiae;Verrucomicrobiales;Verrucomicrobiales_unclassified;Verrucomicrobiales_unclassified;	686	0	0	0	0	0	657	0	0	0	0	28	1	0	0	0	0	0	0	0	0	0	0	0	0	0	0	0	0	0	0	0	0	0	0	0	0	0	0	0	0	686
Bacteria;Verrucomicrobia;Verrucomicrobiae;Opitutales;Puniceicoccaceae;Puniceicoccaceae_ge;	553	196	190	3	0	0	0	0	0	0	0	0	0	0	0	67	0	0	0	0	0	0	0	8	1	0	0	85	0	0	0	0	0	2	1	0	0	0	0	0	0	553
Bacteria;Firmicutes;Clostridia;Clostridiales;Family_XIII;Family_XIII_AD3011_group;	439	9	3	30	4	8	0	98	9	0	0	27	10	5	8	4	2	10	13	12	19	19	16	3	52	7	7	3	8	7	2	3	2	15	4	14	0	3	1	1	1	439
Bacteria;Proteobacteria;Deltaproteobacteria;Desulfovibrionales;Desulfovibrionaceae;Desulfovibrionaceae_unclassified;	432	0	0	90	0	0	23	0	0	0	0	0	102	0	38	64	0	0	3	0	0	0	0	39	0	0	0	0	0	0	0	0	0	0	0	0	0	29	0	44	0	432
Bacteria;Proteobacteria;Gammaproteobacteria;Enterobacteriales;Enterobacteriaceae;Citrobacter;	405	0	2	0	0	0	14	0	0	0	0	0	0	0	0	0	0	0	0	0	0	0	0	0	380	0	1	0	0	0	8	0	0	0	0	0	0	0	0	0	0	405
Bacteria;Firmicutes;Clostridia;Clostridiales;Christensenellaceae;uncultured;	401	13	14	34	15	32	0	34	8	1	0	44	3	0	5	25	11	13	6	6	14	17	5	5	41	2	7	8	1	0	3	0	14	6	3	4	0	2	2	2	1	401
Bacteria;Firmicutes;Erysipelotrichia;Erysipelotrichales;Erysipelotrichaceae;Catenibacterium;	385	0	0	0	0	0	0	0	149	0	0	0	0	0	0	0	0	0	0	0	219	0	0	0	17	0	0	0	0	0	0	0	0	0	0	0	0	0	0	0	0	385
Bacteria;Firmicutes;Bacilli;Lactobacillales;Enterococcaceae;Enterococcus;	364	1	0	0	24	0	146	0	0	0	5	0	15	0	23	1	63	1	0	0	0	13	11	0	0	1	3	15	41	1	0	0	0	0	0	0	0	0	0	0	0	364
Bacteria;Synergistetes;Synergistia;Synergistales;Synergistaceae;Synergistaceae_unclassified;	315	5	0	0	213	0	0	6	0	0	0	0	0	0	1	3	0	0	1	0	0	0	0	14	70	0	0	0	0	0	0	0	0	0	1	0	0	0	0	1	0	315
Bacteria;Proteobacteria;Alphaproteobacteria;Rickettsiales;Mitochondria;Mitochondria_ge;	294	2	4	2	157	0	0	0	3	0	0	0	0	0	1	1	1	4	52	0	3	0	2	2	3	0	0	53	0	0	0	0	0	0	1	2	0	0	1	0	0	294
Bacteria;Firmicutes;Clostridia;Clostridiales;Clostridiaceae_1;Clostridium_sensu_stricto_1;	260	20	26	0	0	6	70	0	0	13	0	0	11	0	2	0	0	0	0	0	8	20	0	1	54	0	2	3	2	0	0	1	0	0	0	0	0	0	0	21	0	260
Bacteria;Proteobacteria;Gammaproteobacteria;Enterobacteriales;Enterobacteriaceae;Proteus;	229	0	0	0	0	0	5	0	0	0	222	0	0	0	0	0	0	0	0	0	0	2	0	0	0	0	0	0	0	0	0	0	0	0	0	0	0	0	0	0	0	229
Bacteria;Firmicutes;Clostridia;Clostridiales;Ruminococcaceae;uncultured;	207	118	0	0	42	0	0	0	0	0	0	0	0	0	0	44	0	0	0	0	0	0	0	0	0	0	0	0	0	0	0	0	3	0	0	0	0	0	0	0	0	207
Bacteria;Firmicutes;Clostridia;Clostridiales;Family_XIII;Family_XIII_ge;	188	0	0	27	26	25	0	0	0	4	0	15	4	0	0	6	2	7	1	0	7	6	0	0	1	0	16	0	1	0	0	0	0	35	0	2	0	0	1	1	1	188
Bacteria;Fusobacteria;Fusobacteriia;Fusobacteriales;Fusobacteriaceae;Fusobacterium;	182	0	0	0	5	0	43	0	2	0	86	0	0	7	0	1	0	1	0	0	0	7	0	0	21	0	0	0	0	0	0	1	2	0	0	0	0	0	0	0	6	182
Bacteria;Patescibacteria;Saccharimonadia;Saccharimonadales;Saccharimonadaceae;Saccharimonadaceae_ge;	155	1	1	3	18	1	0	26	28	0	0	8	8	13	0	2	0	3	2	3	4	5	0	10	7	0	0	0	4	4	0	0	2	0	1	0	0	0	0	0	1	155
Bacteria;Epsilonbacteraeota;Campylobacteria;Campylobacterales;Campylobacteraceae;Campylobacter;	153	0	0	0	0	0	0	0	1	0	125	0	1	0	0	0	0	1	0	1	0	5	0	1	1	0	0	0	5	4	0	4	3	0	0	0	0	0	0	1	0	153
Bacteria;Actinobacteria;Coriobacteriia;Coriobacteriales;Atopobiaceae;Atopobiaceae_unclassified;	147	0	0	0	1	0	0	35	1	0	2	0	0	0	2	3	85	1	0	0	1	1	0	2	2	0	0	8	0	0	0	2	1	0	0	0	0	0	0	0	0	147
Bacteria;Firmicutes;Clostridia;Clostridiales;Lachnospiraceae;Howardella;	137	0	25	0	0	0	0	0	0	0	0	0	0	0	0	0	0	0	0	0	0	0	0	0	98	0	0	14	0	0	0	0	0	0	0	0	0	0	0	0	0	137
Bacteria;Proteobacteria;Gammaproteobacteria;Pasteurellales;Pasteurellaceae;Haemophilus;	126	0	0	0	0	0	0	0	18	3	18	0	0	0	5	0	0	0	0	0	0	0	0	0	0	0	0	0	0	0	0	0	82	0	0	0	0	0	0	0	0	126
Bacteria;Actinobacteria;Actinobacteria;Actinomycetales;Actinomycetaceae;Actinomyces;	119	2	2	3	3	0	0	34	0	1	5	13	0	7	7	4	0	7	1	1	2	11	0	2	7	0	2	0	2	0	0	1	0	1	0	0	0	0	0	1	0	119
Bacteria;Firmicutes;Clostridia;Clostridiales;Peptococcaceae;Peptococcus;	101	33	0	0	0	3	1	1	1	0	1	20	1	0	4	5	0	0	0	0	24	0	0	1	0	3	0	1	0	0	0	0	0	0	0	0	0	0	0	2	0	101
Bacteria;Firmicutes;Clostridia;Clostridiales;Ruminococcaceae;Ruminococcaceae_UCG-008;	99	0	3	0	0	0	0	83	0	0	0	0	0	0	0	0	0	0	0	0	0	0	0	1	0	0	0	12	0	0	0	0	0	0	0	0	0	0	0	0	0	99
Bacteria;Firmicutes;Clostridia;Clostridiales;Lachnospiraceae;Lachnospiraceae_FCS020_group;	81	8	0	0	2	1	0	10	1	0	0	12	0	0	3	8	0	2	4	0	7	1	0	2	7	0	0	4	3	0	0	3	1	0	1	1	0	0	0	0	0	81
Bacteria;Firmicutes;Bacilli;Lactobacillales;Streptococcaceae;Lactococcus;	80	0	0	1	0	0	24	15	0	0	1	0	5	0	0	3	0	0	0	0	7	3	4	3	0	0	1	10	0	0	0	0	3	0	0	0	0	0	0	0	0	80
Bacteria;Firmicutes;Bacilli;Lactobacillales;Lactobacillales_unclassified;Lactobacillales_unclassified;	79	1	0	4	3	0	2	2	1	0	9	0	0	2	8	9	0	13	3	1	2	6	0	0	3	0	1	2	0	0	0	4	1	0	0	0	0	0	0	1	1	79
Bacteria;Actinobacteria;Actinobacteria;Micrococcales;Micrococcaceae;Rothia;	72	0	0	2	4	0	6	4	1	0	1	0	0	0	19	10	0	4	0	0	4	4	0	0	0	0	0	12	0	0	0	0	1	0	0	0	0	0	0	0	0	72
Bacteria;Firmicutes;Erysipelotrichia;Erysipelotrichales;Erysipelotrichaceae;Coprobacillus;	72	0	0	0	2	0	0	0	2	0	0	0	0	15	0	6	0	0	0	0	0	8	2	10	18	2	0	0	2	0	4	0	0	0	0	0	0	0	0	1	0	72
Bacteria;Firmicutes;Clostridia;Clostridiales;Lachnospiraceae;Epulopiscium;	68	0	13	0	0	0	0	0	0	0	0	0	0	0	0	0	0	0	0	0	22	0	0	0	29	0	0	0	4	0	0	0	0	0	0	0	0	0	0	0	0	68
Bacteria;Patescibacteria;Saccharimonadia;Saccharimonadales;Saccharimonadales_fa;Saccharimonadales_ge;	64	3	2	7	3	1	0	5	2	0	1	4	0	3	0	0	1	0	1	0	11	2	1	3	1	0	2	0	3	0	0	0	6	0	0	0	0	1	0	1	0	64
Bacteria;Firmicutes;Bacilli;Bacillales;Bacillales_unclassified;Bacillales_unclassified;	42	0	2	1	2	0	7	1	0	0	1	0	0	0	11	1	0	4	0	0	0	0	0	0	6	0	0	1	2	0	0	0	2	0	0	0	0	0	1	0	0	42
Bacteria;Proteobacteria;Gammaproteobacteria;Betaproteobacteriales;Betaproteobacteriales_unclassified;Betaproteobacteriales_unclassified;	42	0	0	0	0	0	0	0	1	0	0	0	0	0	0	0	0	0	0	0	0	0	0	0	0	0	41	0	0	0	0	0	0	0	0	0	0	0	0	0	0	42
Bacteria;Firmicutes;Clostridia;Clostridiales;Lachnospiraceae;Anaerostipes;	41	0	0	0	0	0	0	0	0	0	4	0	0	0	0	0	0	3	0	15	0	0	1	0	0	0	1	0	0	7	0	4	0	0	0	0	0	0	0	0	6	41
Bacteria;Bacteroidetes;Bacteroidia;Bacteroidales;Prevotellaceae;Prevotella_6;	39	0	0	0	0	0	0	0	0	0	0	0	0	0	0	0	0	0	0	0	0	0	0	0	38	0	0	0	0	0	0	0	0	1	0	0	0	0	0	0	0	39
Bacteria;Proteobacteria;Gammaproteobacteria;Pseudomonadales;Pseudomonadaceae;Pseudomonas;	39	0	0	0	0	0	0	0	3	0	0	0	0	0	0	7	0	0	2	0	0	17	0	9	0	0	0	0	0	0	0	0	1	0	0	0	0	0	0	0	0	39
Bacteria;Proteobacteria;Gammaproteobacteria;Enterobacteriales;Enterobacteriaceae;Klebsiella;	38	0	0	0	0	0	37	0	0	0	0	0	0	0	0	0	0	0	0	0	0	0	0	1	0	0	0	0	0	0	0	0	0	0	0	0	0	0	0	0	0	38
Bacteria;Firmicutes;Negativicutes;Selenomonadales;Veillonellaceae;Selenomonas_3;	36	0	0	0	0	0	0	0	0	0	30	0	0	0	0	0	0	0	0	0	0	0	0	0	0	0	0	0	0	1	0	4	0	0	0	0	0	1	0	0	0	36
Bacteria;Tenericutes;Mollicutes;Mollicutes_RF39;Mollicutes_RF39_fa;Mollicutes_RF39_ge;	35	0	8	5	0	0	0	0	0	4	0	0	0	0	0	0	0	0	18	0	0	0	0	0	0	0	0	0	0	0	0	0	0	0	0	0	0	0	0	0	0	35
Bacteria;Cyanobacteria;Melainabacteria;Gastranaerophilales;Gastranaerophilales_fa;Gastranaerophilales_ge;	32	0	0	2	0	0	0	0	0	0	0	0	0	0	0	0	0	0	0	0	0	0	0	0	0	0	0	0	0	0	30	0	0	0	0	0	0	0	0	0	0	32
Bacteria;Proteobacteria;Gammaproteobacteria;Gammaproteobacteria_unclassified;Gammaproteobacteria_unclassified;Gammaproteobacteria_unclassified;	28	0	0	0	0	0	0	0	0	0	0	0	0	0	0	28	0	0	0	0	0	0	0	0	0	0	0	0	0	0	0	0	0	0	0	0	0	0	0	0	0	28
Bacteria;Firmicutes;Bacilli;Lactobacillales;Leuconostocaceae;Leuconostoc;	27	0	0	1	0	0	0	1	0	0	0	0	0	0	16	0	1	0	1	0	0	1	2	0	1	0	0	3	0	0	0	0	0	0	0	0	0	0	0	0	0	27
Bacteria;Firmicutes;Clostridia;Clostridiales;Eubacteriaceae;Eubacteriaceae_unclassified;	27	0	0	0	0	3	0	0	0	0	0	0	0	0	0	0	0	15	0	7	0	0	0	0	0	0	0	0	2	0	0	0	0	0	0	0	0	0	0	0	0	27
Bacteria;Cyanobacteria;Cyanobacteria_unclassified;Cyanobacteria_unclassified;Cyanobacteria_unclassified;Cyanobacteria_unclassified;	23	0	0	0	0	0	0	0	0	0	0	0	0	0	0	0	0	0	23	0	0	0	0	0	0	0	0	0	0	0	0	0	0	0	0	0	0	0	0	0	0	23
Bacteria;Synergistetes;Synergistia;Synergistales;Synergistaceae;uncultured;	22	0	0	0	0	0	0	0	0	2	0	0	0	0	0	0	0	0	0	0	0	0	0	16	0	0	0	0	0	0	0	0	0	0	4	0	0	0	0	0	0	22
Bacteria;Proteobacteria;Gammaproteobacteria;Betaproteobacteriales;Burkholderiaceae;Comamonas;	19	0	0	0	0	0	0	0	19	0	0	0	0	0	0	0	0	0	0	0	0	0	0	0	0	0	0	0	0	0	0	0	0	0	0	0	0	0	0	0	0	19
Bacteria;Firmicutes;Bacilli;Lactobacillales;Leuconostocaceae;Weissella;	18	0	0	0	1	0	0	0	0	0	0	0	0	0	0	0	0	3	0	0	0	1	7	0	0	0	1	0	0	0	5	0	0	0	0	0	0	0	0	0	0	18
Bacteria;Proteobacteria;Gammaproteobacteria;Enterobacteriales;Enterobacteriaceae;Morganella;	18	0	0	0	0	0	5	0	4	0	0	0	0	0	0	4	0	0	0	0	0	2	0	0	0	0	0	0	0	1	0	0	0	0	0	0	0	2	0	0	0	18
Bacteria;Firmicutes;Clostridia;Clostridiales;Peptostreptococcaceae;Peptostreptococcus;	17	0	0	0	0	0	0	0	0	0	2	0	0	0	0	0	0	0	0	0	0	1	0	0	13	0	0	0	0	0	0	0	1	0	0	0	0	0	0	0	0	17
Bacteria;Firmicutes;Clostridia;Clostridiales;Ruminococcaceae;Ethanoligenens;	17	1	0	0	0	10	0	0	3	0	0	0	0	0	0	0	0	0	0	0	0	0	0	0	0	0	0	0	0	0	0	0	1	2	0	0	0	0	0	0	0	17
Bacteria;Firmicutes;Clostridia;Clostridiales;Family_XI;Parvimonas;	16	0	0	0	0	0	0	0	0	0	0	0	0	1	0	3	0	0	1	0	0	6	0	0	4	0	0	1	0	0	0	0	0	0	0	0	0	0	0	0	0	16
Bacteria;Firmicutes;Clostridia;Clostridiales;Peptococcaceae;Peptococcaceae_unclassified;	16	0	0	9	0	0	0	0	0	0	0	0	0	0	0	0	0	0	0	0	0	0	0	0	0	6	0	1	0	0	0	0	0	0	0	0	0	0	0	0	0	16
Bacteria;Firmicutes;Clostridia;Clostridiales;Syntrophomonadaceae;Syntrophomonas;	16	0	0	8	0	0	0	0	6	0	0	0	0	0	0	0	0	0	0	0	0	0	0	0	0	0	0	2	0	0	0	0	0	0	0	0	0	0	0	0	0	16
Bacteria;Firmicutes;Clostridia;Clostridiales;Clostridiaceae_1;Clostridium_sensu_stricto_13;	15	0	0	0	0	0	0	0	0	0	0	0	0	0	0	0	0	0	0	0	13	0	0	0	0	0	0	0	2	0	0	0	0	0	0	0	0	0	0	0	0	15
Bacteria;Actinobacteria;Actinobacteria;Corynebacteriales;Corynebacteriaceae;Corynebacterium_1;	13	0	0	0	0	0	0	0	0	0	0	0	1	0	0	0	0	0	0	0	0	0	0	0	0	0	0	12	0	0	0	0	0	0	0	0	0	0	0	0	0	13
Bacteria;Actinobacteria;Actinobacteria_unclassified;Actinobacteria_unclassified;Actinobacteria_unclassified;Actinobacteria_unclassified;	13	0	0	0	0	0	0	0	0	0	0	0	0	0	0	0	0	0	0	0	1	0	0	12	0	0	0	0	0	0	0	0	0	0	0	0	0	0	0	0	0	13
Bacteria;Firmicutes;Erysipelotrichia;Erysipelotrichales;Erysipelotrichaceae;Solobacterium;	13	0	0	3	1	0	0	2	2	0	0	1	0	0	0	0	0	1	0	0	1	0	0	0	2	0	0	0	0	0	0	0	0	0	0	0	0	0	0	0	0	13
Bacteria;Firmicutes;Bacilli;Bacillales;Staphylococcaceae;Staphylococcus;	11	0	0	0	0	0	0	0	0	0	0	0	0	0	0	1	0	0	0	0	0	0	0	0	0	0	0	10	0	0	0	0	0	0	0	0	0	0	0	0	0	11
Bacteria;Firmicutes;Bacilli;Lactobacillales;Carnobacteriaceae;Carnobacterium;	10	0	0	0	0	0	0	0	0	0	5	0	0	0	5	0	0	0	0	0	0	0	0	0	0	0	0	0	0	0	0	0	0	0	0	0	0	0	0	0	0	10
Bacteria;Firmicutes;Clostridia;Clostridiales;Lachnospiraceae;Oribacterium;	10	0	0	2	0	0	0	0	0	0	2	0	0	2	0	1	0	0	0	0	0	1	0	0	1	0	0	0	1	0	0	0	0	0	0	0	0	0	0	0	0	10
Bacteria;Proteobacteria;Gammaproteobacteria;Betaproteobacteriales;Neisseriaceae;Neisseria;	10	1	0	0	0	0	2	0	0	0	0	0	0	0	0	0	0	4	0	0	0	0	0	0	0	0	0	0	0	3	0	0	0	0	0	0	0	0	0	0	0	10
Bacteria;Firmicutes;Clostridia;Clostridiales;Lachnospiraceae;Stomatobaculum;	9	0	0	0	0	0	0	3	0	0	0	0	0	1	1	0	0	0	0	1	0	2	0	0	0	0	0	0	0	0	0	1	0	0	0	0	0	0	0	0	0	9
Bacteria;Proteobacteria;Gammaproteobacteria;Enterobacteriales;Enterobacteriaceae;Providencia;	9	0	0	0	0	3	1	0	1	0	0	0	3	0	0	0	0	0	0	0	0	0	0	0	0	0	0	0	0	0	0	1	0	0	0	0	0	0	0	0	0	9
Bacteria;Proteobacteria;Gammaproteobacteria;Pseudomonadales;Moraxellaceae;Acinetobacter;	8	0	0	0	0	0	0	0	2	0	2	0	0	0	0	0	0	0	0	0	0	0	0	0	0	0	0	4	0	0	0	0	0	0	0	0	0	0	0	0	0	8
Bacteria;Bacteroidetes;Bacteroidia;Flavobacteriales;Flavobacteriaceae;Flavobacterium;	7	0	0	0	0	0	0	7	0	0	0	0	0	0	0	0	0	0	0	0	0	0	0	0	0	0	0	0	0	0	0	0	0	0	0	0	0	0	0	0	0	7
Bacteria;Patescibacteria;Saccharimonadia;Saccharimonadales;Saccharimonadales_unclassified;Saccharimonadales_unclassified;	7	0	0	0	1	1	0	2	0	0	0	1	1	0	0	0	0	0	0	0	0	0	0	0	0	0	0	0	1	0	0	0	0	0	0	0	0	0	0	0	0	7
Bacteria;Proteobacteria;Alphaproteobacteria;Sphingomonadales;Sphingomonadaceae;Sphingomonadaceae_unclassified;	6	0	2	0	0	0	2	0	0	0	0	0	0	0	0	0	0	0	0	0	0	0	0	0	1	0	0	0	0	0	1	0	0	0	0	0	0	0	0	0	0	6
Bacteria;Proteobacteria;Gammaproteobacteria;Betaproteobacteriales;Burkholderiaceae;Rhodoferax;	6	0	0	0	1	0	2	0	0	0	1	0	0	0	0	0	0	0	0	0	0	0	1	0	0	0	0	0	0	0	0	1	0	0	0	0	0	0	0	0	0	6
Bacteria;Firmicutes;Clostridia;Clostridiales;Family_XI;Finegoldia;	5	0	0	0	0	0	0	0	0	0	0	0	0	3	0	0	0	0	0	0	0	0	0	0	2	0	0	0	0	0	0	0	0	0	0	0	0	0	0	0	0	5
Bacteria;Actinobacteria;Actinobacteria;Bifidobacteriales;Bifidobacteriaceae;Bifidobacteriaceae_unclassified;	4	0	0	0	4	0	0	0	0	0	0	0	0	0	0	0	0	0	0	0	0	0	0	0	0	0	0	0	0	0	0	0	0	0	0	0	0	0	0	0	0	4
Bacteria;Firmicutes;Clostridia;Clostridiales;Family_XI;Peptoniphilus;	4	0	0	0	0	0	0	0	0	0	0	0	0	0	2	0	0	0	0	0	0	0	0	0	1	0	0	0	1	0	0	0	0	0	0	0	0	0	0	0	0	4
Bacteria;Firmicutes;Clostridia;Clostridiales;Lachnospiraceae;Coprococcus_3;	4	0	2	0	0	0	0	0	0	0	0	0	0	0	0	0	0	0	0	0	0	0	0	0	2	0	0	0	0	0	0	0	0	0	0	0	0	0	0	0	0	4
Bacteria;Firmicutes;Clostridia;Clostridiales;Peptostreptococcaceae;Terrisporobacter;	4	2	0	0	0	0	0	0	0	0	0	0	0	0	0	0	0	0	0	0	0	0	0	0	2	0	0	0	0	0	0	0	0	0	0	0	0	0	0	0	0	4
Bacteria;Proteobacteria;Gammaproteobacteria;Betaproteobacteriales;Nitrosomonadaceae;Ellin6067;	4	0	0	0	1	0	0	0	1	0	0	0	0	0	0	0	0	0	0	0	0	0	0	0	1	0	0	0	0	1	0	0	0	0	0	0	0	0	0	0	0	4
Bacteria;Proteobacteria;Proteobacteria_unclassified;Proteobacteria_unclassified;Proteobacteria_unclassified;Proteobacteria_unclassified;	4	0	0	0	0	0	0	0	2	0	0	0	0	0	0	0	0	0	0	0	0	0	0	0	0	0	0	0	2	0	0	0	0	0	0	0	0	0	0	0	0	4
Bacteria;Bacteroidetes;Bacteroidia;Cytophagales;Spirosomaceae;Arcicella;	3	0	0	0	0	0	0	0	0	2	0	0	0	0	0	0	0	0	0	0	0	0	0	0	0	0	0	0	0	0	1	0	0	0	0	0	0	0	0	0	0	3
Bacteria;Patescibacteria;Gracilibacteria;JGI_0000069-P22;JGI_0000069-P22_fa;JGI_0000069-P22_ge;	3	0	0	0	0	0	0	0	3	0	0	0	0	0	0	0	0	0	0	0	0	0	0	0	0	0	0	0	0	0	0	0	0	0	0	0	0	0	0	0	0	3
Bacteria;Proteobacteria;Alphaproteobacteria;Caulobacterales;Caulobacteraceae;Brevundimonas;	3	0	0	0	0	0	0	3	0	0	0	0	0	0	0	0	0	0	0	0	0	0	0	0	0	0	0	0	0	0	0	0	0	0	0	0	0	0	0	0	0	3
Bacteria;Actinobacteria;Actinobacteria;Propionibacteriales;Propionibacteriaceae;Propionibacteriaceae_unclassified;	2	0	0	0	0	0	0	0	0	0	0	0	0	0	0	0	0	0	0	0	0	0	0	0	0	0	2	0	0	0	0	0	0	0	0	0	0	0	0	0	0	2
Bacteria;Bacteroidetes;Bacteroidia;Sphingobacteriales;env.OPS_17;env.OPS_17_ge;	2	0	0	0	0	0	0	0	0	0	0	0	0	0	0	0	0	0	2	0	0	0	0	0	0	0	0	0	0	0	0	0	0	0	0	0	0	0	0	0	0	2
Bacteria;Firmicutes;Clostridia;Clostridiales;Family_XI;Family_XI_unclassified;	2	0	0	0	0	0	0	0	0	0	0	0	0	0	0	0	0	0	0	0	0	0	0	0	2	0	0	0	0	0	0	0	0	0	0	0	0	0	0	0	0	2
Bacteria;Proteobacteria;Alphaproteobacteria;Rhizobiales;Beijerinckiaceae;Bosea;	2	0	0	0	0	0	0	2	0	0	0	0	0	0	0	0	0	0	0	0	0	0	0	0	0	0	0	0	0	0	0	0	0	0	0	0	0	0	0	0	0	2
Bacteria;Proteobacteria;Gammaproteobacteria;Pseudomonadales;Moraxellaceae;Psychrobacter;	2	0	0	0	0	0	0	0	0	0	2	0	0	0	0	0	0	0	0	0	0	0	0	0	0	0	0	0	0	0	0	0	0	0	0	0	0	0	0	0	0	2

## Sheet: otus99-mothur-linux
taxonomy	total	A003	A014	A018	A036	A042	A056	A063	A070	A080	A081	A093	A131	A139	A140	A147	A157	A160	A167	A169	A174	A181	A190	A215	A224	A235	A239	A243	A244	A258	A260	A262	C023	C035	C059	C072	C089	C114	C145	C146	C209
Root	2812333	116830	99722	115750	144954	44387	72487	82417	116006	19870	88772	89043	50889	31503	47287	61639	24805	43874	75981	81120	116073	92851	84754	95657	86319	22537	106660	102228	63060	72102	29782	126742	122337	22290	52914	50597	27241	30704	25611	37112	37426
Bacteria;Bacteroidetes;Bacteroidia;Bacteroidales;Bacteroidaceae;Bacteroides;	611856	4702	3945	25008	41542	13249	2470	1311	11156	4297	43485	13776	13810	81	6300	9892	7385	14588	10842	30682	8716	27990	26458	8921	9384	3509	22159	23606	20534	33665	9999	55099	27987	833	5604	4869	14207	10528	12577	9963	16727
Bacteria;Firmicutes;Clostridia;Clostridiales;Lachnospiraceae;Lachnospiraceae_unclassified;	219251	5615	4215	4344	7213	3357	18	4901	7577	2252	10099	7159	4455	3692	6182	6098	1239	3334	8069	20101	4452	3521	6424	8253	6267	978	4669	8187	7067	4130	1917	18811	8169	1027	5125	5905	4289	2490	2044	2219	3387
Bacteria;Bacteroidetes;Bacteroidia;Bacteroidales;Rikenellaceae;Alistipes;	154987	10374	692	16008	16842	6067	1	170	9028	892	3	5958	4767	16	1235	2368	1921	523	822	3432	9197	6060	5954	7079	4180	1307	10077	5972	2533	1	1609	2197	4865	2211	2829	2267	576	365	563	1063	2963
Bacteria;Firmicutes;Clostridia;Clostridiales;Ruminococcaceae;Faecalibacterium;	153794	6416	2715	2658	4601	3246	1	370	5042	2498	11	2548	3574	1392	3765	3436	641	3724	5143	2715	5910	9237	10522	6921	3941	2855	195	9742	3266	10176	2012	13631	7052	393	1685	6227	1425	0	1615	2493	0
Bacteria;Bacteroidetes;Bacteroidia;Bacteroidales;Bacteroidales_unclassified;Bacteroidales_unclassified;	146077	5827	3531	10001	8862	1136	168	501	23468	747	21	6392	1598	24	1071	3596	649	999	1062	10	8360	11319	4523	6861	5081	1035	944	10017	1970	1916	303	4761	5730	1179	4063	1729	778	2216	468	2088	1073
Bacteria;Firmicutes;Clostridia;Clostridiales;Ruminococcaceae;Ruminococcaceae_ge;	88018	1257	2067	2446	1221	873	19	33573	984	574	1332	8179	755	1345	235	441	159	155	9098	1033	6263	1192	909	501	6161	378	1132	543	162	108	206	503	216	600	1778	327	135	387	24	702	45
Bacteria;Bacteroidetes;Bacteroidia;Bacteroidales;Prevotellaceae;Prevotella_7;	83010	26120	28904	0	2	2	14	109	0	0	0	0	0	2	8045	1	0	1	0	1	7762	1	0	1872	3487	283	1	0	0	0	0	0	0	0	8	6394	0	1	0	0	0
Bacteria;Firmicutes;Clostridia;Clostridiales;Ruminococcaceae;Ruminococcaceae_unclassified;	73543	2574	1939	2293	2451	853	23	633	3658	427	215	4311	1179	151	1953	3056	543	895	1134	1251	3915	2638	449	5246	4287	590	3793	3385	1644	650	944	1118	2131	4673	4045	1627	319	1219	520	589	222
Bacteria;Firmicutes;Clostridia;Clostridiales;Ruminococcaceae;Subdoligranulum;	67995	1935	724	4858	4	1259	0	3170	2093	36	1	3720	756	922	926	2088	887	899	2196	596	4301	2579	3068	732	2879	1185	3711	2627	1328	2958	304	2433	5244	1	2448	1155	501	489	710	595	1677
Bacteria;Firmicutes;Clostridia;Clostridiales;Ruminococcaceae;CAG-352;	63542	511	357	2719	4740	566	14	10335	636	234	961	2779	265	338	0	956	621	668	522	1890	2045	1186	396	3590	1743	444	13012	459	1835	4993	1358	0	845	204	498	226	0	420	147	532	497
Bacteria;Firmicutes;Clostridia;Clostridiales;Ruminococcaceae;Ruminococcus_1;	53321	188	1645	10823	2000	814	1	29	391	1	3390	801	360	1	355	2333	3219	933	2247	1482	2692	804	453	411	2087	114	635	2542	446	2	210	2	6179	211	1254	450	4	482	20	3213	97
Bacteria;Firmicutes;Clostridia;Clostridiales;Lachnospiraceae;Blautia;	50365	1834	418	2347	2596	200	46	3821	440	297	1093	1239	475	4476	553	351	613	728	1332	414	2081	1841	1623	1209	1103	230	3461	1024	806	3696	493	3008	958	275	1053	777	635	1038	437	264	1080
Bacteria;Proteobacteria;Alphaproteobacteria;Alphaproteobacteria_unclassified;Alphaproteobacteria_unclassified;Alphaproteobacteria_unclassified;	50349	5911	723	407	0	1	0	8	3510	1631	0	286	660	10	828	3701	1	0	4	2090	1	0	160	7972	98	10	173	3457	1943	0	1225	0	12598	29	0	37	0	153	0	2	2720
Bacteria;Verrucomicrobia;Verrucomicrobiae;Verrucomicrobiales;Verrucomicrobiaceae;uncultured;	48178	671	14	107	6395	9	15779	0	1955	4	2	738	230	133	37	558	0	163	2383	174	569	2	2	29	1445	61	5787	6	823	42	32	3	4244	6	1927	6	2	3336	2	6	496
Bacteria;Bacteria_unclassified;Bacteria_unclassified;Bacteria_unclassified;Bacteria_unclassified;Bacteria_unclassified;	46443	1828	3400	79	238	148	25444	3	413	108	156	45	257	0	734	380	13	2	24	4	3743	482	20	1581	76	10	236	1386	90	7	22	1	1848	36	1056	2384	18	20	4	38	109
Bacteria;Firmicutes;Clostridia;Clostridiales;Lachnospiraceae;uncultured;	46217	440	392	1162	1422	618	10	438	2687	1408	1739	1362	914	1792	1175	1960	17	213	2754	1982	616	339	346	2473	1036	103	3066	6335	946	167	376	653	3267	136	1144	1372	619	161	96	280	201
Bacteria;Firmicutes;Clostridia;Clostridiales;Ruminococcaceae;Ruminococcaceae_UCG-002;	42954	2228	718	2228	1521	1062	0	1010	3152	1	0	932	636	3	944	370	140	65	423	634	3544	2118	155	1991	5223	705	3361	354	1761	19	1405	707	1130	288	1374	1970	27	507	61	187	0
Bacteria;Firmicutes;Clostridia;Clostridiales;Lachnospiraceae;Agathobacter;	42647	2807	665	2	1	1477	0	320	413	294	1	756	2560	1714	229	562	1	4834	5564	1	891	4464	372	290	258	78	3614	927	2880	2	67	1	871	173	869	1270	61	1047	1198	1113	0
Bacteria;Bacteroidetes;Bacteroidia;Bacteroidales;Tannerellaceae;Parabacteroides;	38172	1340	93	1681	41	667	1172	53	142	581	0	1423	816	9	307	827	555	897	225	1497	810	1915	5280	1567	230	49	2869	1190	434	2296	746	3069	1926	83	229	196	0	415	285	1057	1200
Bacteria;Firmicutes;Clostridia;Clostridiales;Lachnospiraceae;Roseburia;	37678	735	678	355	285	195	0	257	996	73	4714	1141	349	73	306	585	162	4375	1046	1109	369	855	659	461	571	302	1170	2341	3275	1	1366	2186	1620	142	424	1017	849	349	1687	502	98
Bacteria;Bacteroidetes;Bacteroidia;Bacteroidales;Prevotellaceae;Prevotellaceae_unclassified;	36788	2486	1246	3	3	3	44	1844	8236	5	29	3	5	8	1631	734	0	2	2	2	9766	4	5	2424	560	233	3	1345	0	2	1	0	6	0	5058	1093	1	1	0	0	0
Bacteria;Firmicutes;Negativicutes;Selenomonadales;Acidaminococcaceae;Phascolarctobacterium;	35525	765	1910	1967	0	398	2818	82	0	462	1	8167	2078	108	2	74	693	382	1969	4999	496	25	0	260	1286	0	2	1	141	0	297	0	2316	258	1338	67	328	0	805	11	1019
Bacteria;Firmicutes;Clostridia;Clostridiales;Christensenellaceae;Christensenellaceae_R-7_group;	35389	748	463	2227	177	875	3	51	1148	40	0	680	2214	0	833	1847	33	6	3761	739	914	1269	3	550	6004	345	214	4524	370	0	4	77	4102	231	759	113	0	0	13	17	35
Bacteria;Firmicutes;Clostridia;Clostridiales;Ruminococcaceae;Ruminococcaceae_UCG-014;	34274	2737	2004	4069	75	14	2	980	2506	72	1	3400	286	3	475	1690	2	29	163	1	2311	41	1468	2434	3970	957	1815	1041	709	6	169	1	2	33	796	0	0	10	0	0	2
Bacteria;Proteobacteria;Gammaproteobacteria;Betaproteobacteriales;Burkholderiaceae;Burkholderiaceae_unclassified;	31273	4550	1729	89	247	14	1	80	3119	479	0	0	1136	171	1083	23	0	1	166	67	866	2678	4109	2921	125	121	723	0	0	1	569	0	4848	64	185	0	0	904	11	193	0
Bacteria;Bacteroidetes;Bacteroidia;Bacteroidales;Tannerellaceae;Tannerellaceae_unclassified;	29778	4	3426	2139	8233	448	0	99	2999	1	0	0	757	19	95	326	309	2	332	0	1620	7	27	376	273	258	1558	0	1051	0	146	2	3148	156	418	193	1	908	0	447	0
Bacteria;Proteobacteria;Gammaproteobacteria;Betaproteobacteriales;Burkholderiaceae;Parasutterella;	27607	0	1	25	11000	590	3	0	0	0	0	2009	24	1	2	653	582	1705	477	0	75	0	661	5	11	1	0	632	607	962	0	4796	0	25	295	915	450	0	0	151	949
Bacteria;Firmicutes;Clostridia;Clostridiales;Ruminococcaceae;Ruminiclostridium_6;	23698	5373	694	115	1086	257	11	11	2427	0	191	785	758	1	263	0	0	465	53	0	157	0	0	5843	104	239	0	0	263	0	665	16	2590	529	66	16	0	2	2	4	712
Bacteria;Actinobacteria;Actinobacteria;Bifidobacteriales;Bifidobacteriaceae;Bifidobacterium;	22148	60	107	1121	437	581	11	1924	34	0	2441	1471	14	992	21	394	767	135	3762	0	1201	1798	110	12	848	0	1398	123	76	2	4	272	77	1778	103	0	0	1	0	38	35
Bacteria;Firmicutes;Erysipelotrichia;Erysipelotrichales;Erysipelotrichaceae;Erysipelotrichaceae_unclassified;	21129	161	96	770	149	8	0	6490	27	7	0	1292	405	3428	421	16	5	104	1324	889	26	280	412	178	331	56	1109	148	77	310	56	1294	338	54	153	172	497	9	8	29	0
Bacteria;Proteobacteria;Gammaproteobacteria;Enterobacteriales;Enterobacteriaceae;Escherichia-Shigella;	20835	1	1	152	115	15	1651	82	25	674	148	1378	1104	28	8	19	2	9	14	2	6320	224	0	24	168	34	17	200	1562	3627	1060	0	10	5	1	0	3	11	15	2121	5
Bacteria;Firmicutes;Clostridia;Clostridiales;Lachnospiraceae;Fusicatenibacter;	18194	343	96	319	2168	168	0	155	236	74	1086	362	284	621	87	546	0	540	1834	286	429	1379	1710	284	306	222	225	57	199	1	176	984	610	5	241	660	488	0	107	191	715
Bacteria;Firmicutes;Clostridia;Clostridiales;Lachnospiraceae;Lachnoclostridium;	17576	791	194	247	241	208	0	1978	248	139	845	107	106	3662	534	208	78	27	396	133	1370	816	91	102	459	89	416	81	163	804	127	501	320	329	260	194	84	79	22	836	291
Bacteria;Proteobacteria;Gammaproteobacteria;Enterobacteriales;Enterobacteriaceae;Enterobacteriaceae_unclassified;	16295	132	200	1	170	1	11508	0	20	3	202	4	11	0	275	6	0	14	0	0	19	1	1	483	322	1	11	105	4	12	536	1	496	0	1	0	0	0	1	1754	0
Bacteria;Firmicutes;Negativicutes;Selenomonadales;Veillonellaceae;Veillonella;	15933	27	3	8	8	367	2	41	74	50	12805	21	11	25	342	56	0	291	13	28	1	36	38	12	28	1	16	65	8	51	2	525	44	253	3	3	0	24	0	594	57
Bacteria;Firmicutes;Bacilli;Lactobacillales;Streptococcaceae;Streptococcus;	15212	69	91	72	26	22	8723	133	46	19	574	13	31	56	1856	587	10	312	466	77	23	196	35	9	61	9	40	572	5	23	50	29	31	229	4	23	11	42	2	572	63
Bacteria;Bacteroidetes;Bacteroidia;Bacteroidia_unclassified;Bacteroidia_unclassified;Bacteroidia_unclassified;	15192	1	37	1651	2733	255	0	0	424	1	0	698	89	0	0	224	0	0	1	0	1	756	2	161	72	0	2422	2	681	0	1	4007	246	3	97	47	2	39	0	465	74
Bacteria;Firmicutes;Negativicutes;Selenomonadales;Veillonellaceae;Dialister;	15067	1104	0	0	4757	104	73	0	253	0	179	0	0	0	410	0	3	0	0	0	2	492	117	261	3	715	5034	128	246	45	2	1022	1	2	0	0	0	109	4	1	0
Bacteria;Firmicutes;Clostridia;Clostridiales;Ruminococcaceae;Ruminococcaceae_UCG-005;	14363	1182	718	314	166	699	12	96	993	5	1	233	355	12	259	659	6	13	45	118	1319	155	38	1651	1389	246	22	420	269	31	450	61	517	156	1175	393	2	15	11	117	40
Bacteria;Firmicutes;Clostridia;Clostridiales;Lachnospiraceae;Lachnospiraceae_ge;	13897	179	297	527	717	57	0	1023	44	28	80	328	167	761	490	148	323	3	933	0	406	196	515	98	307	441	361	167	401	1	40	117	329	122	744	3103	35	137	45	54	173
Bacteria;Bacteroidetes;Bacteroidia;Bacteroidales;Prevotellaceae;Prevotellaceae_UCG-003;	13796	1533	424	0	1	224	0	40	3293	0	0	1	0	1	576	1077	298	1	1841	2	618	0	2185	1094	278	309	0	0	0	0	0	0	0	0	0	0	0	0	0	0	0
Bacteria;Actinobacteria;Coriobacteriia;Coriobacteriales;Coriobacteriaceae;Collinsella;	13217	917	188	110	29	120	0	1508	75	4	0	87	0	1485	219	87	103	451	574	1	1397	531	242	87	2765	52	1102	139	133	0	11	49	230	205	174	15	0	8	57	62	0
Bacteria;Bacteroidetes;Bacteroidia;Bacteroidales;Marinifilaceae;Odoribacter;	12880	738	151	1235	2	175	0	66	953	0	0	1282	628	0	192	268	142	0	89	364	1096	740	644	268	315	154	260	1115	472	1	110	0	295	7	41	190	266	241	0	247	133
Bacteria;Firmicutes;Clostridia;Clostridiales;Ruminococcaceae;Ruminococcaceae_UCG-010;	11108	663	1577	880	25	28	0	8	1746	0	0	218	174	0	151	88	12	27	1	56	1218	0	0	469	363	91	0	2676	3	0	23	0	377	54	92	13	0	0	0	75	0
Bacteria;Firmicutes;Clostridia;Clostridiales;Ruminococcaceae;Flavonifractor;	10697	331	64	289	881	39	1	126	126	63	1555	135	78	84	126	250	39	300	123	443	364	501	246	128	239	96	624	161	150	184	21	876	176	641	360	83	86	256	312	58	82
Bacteria;Bacteroidetes;Bacteroidia;Bacteroidales;Muribaculaceae;Muribaculaceae_ge;	10179	20	101	422	22	2	0	1	10	659	2	6	9	9	8	2017	1880	1	4	4	10	243	8	122	207	3	1690	12	1	86	5	11	18	6	315	2	4	1057	1011	188	3
Bacteria;Firmicutes;Clostridia;Clostridiales;Clostridiales_unclassified;Clostridiales_unclassified;	10024	1495	599	429	121	374	45	53	557	10	10	128	102	5	28	458	8	12	86	21	356	148	5	1769	312	36	79	723	34	2	17	11	874	771	152	82	5	4	16	52	35
Bacteria;Bacteroidetes;Bacteroidia;Bacteroidales;Rikenellaceae;Rikenellaceae_RC9_gut_group;	9857	0	7209	1	0	1	0	1	2520	0	0	0	0	0	0	0	0	0	0	0	0	0	0	4	7	114	0	0	0	0	0	0	0	0	0	0	0	0	0	0	0
Bacteria;Firmicutes;Clostridia;Clostridiales;Lachnospiraceae;Butyrivibrio;	8829	0	5691	0	0	0	0	0	0	0	0	0	0	0	0	0	0	0	0	0	0	0	0	0	249	2889	0	0	0	0	0	0	0	0	0	0	0	0	0	0	0
Bacteria;Tenericutes;Mollicutes;Mollicutes_unclassified;Mollicutes_unclassified;Mollicutes_unclassified;	8641	985	2790	108	944	0	0	2	2435	0	0	30	105	0	16	473	1	2	0	0	135	1	0	533	0	0	0	66	0	1	0	1	1	10	0	0	0	1	0	0	1
Bacteria;Firmicutes;Clostridia;Clostridiales;Lachnospiraceae;Coprococcus_2;	8611	1100	578	1525	307	1	0	0	303	0	2	549	499	0	104	166	0	203	0	0	293	0	0	214	552	28	709	0	1	0	0	0	871	0	520	0	0	0	86	0	0
Bacteria;Proteobacteria;Deltaproteobacteria;Desulfovibrionales;Desulfovibrionaceae;Desulfovibrio;	8290	123	290	464	923	160	34	236	38	0	0	158	7	0	138	352	0	0	184	0	427	94	0	612	115	0	278	163	569	0	8	1	23	2449	37	369	0	0	0	21	17
Bacteria;Proteobacteria;Deltaproteobacteria;Desulfovibrionales;Desulfovibrionaceae;Bilophila;	8033	323	46	85	2526	28	120	6	377	40	0	0	53	9	120	258	110	112	23	335	237	67	483	138	49	3	246	125	224	222	209	0	216	39	401	219	183	148	129	71	53
Bacteria;Firmicutes;Clostridia;Clostridiales;Christensenellaceae;Christensenellaceae_unclassified;	7801	218	53	2130	7	698	0	12	674	0	0	63	51	0	67	188	9	0	0	0	1932	85	0	236	830	224	34	96	4	0	1	0	1	5	143	5	0	0	15	13	7
Bacteria;Bacteroidetes;Bacteroidia;Bacteroidales;Prevotellaceae;Alloprevotella;	7728	1	5647	0	2	0	1	5	2	0	2	1	0	0	0	1	0	0	1	0	2	3	1	2028	2	0	4	1	0	1	2	2	8	4	0	1	1	0	0	4	1
Bacteria;Firmicutes;Negativicutes;Selenomonadales;Acidaminococcaceae;Acidaminococcaceae_unclassified;	7645	0	0	0	0	0	0	101	0	0	0	0	0	0	0	2626	192	0	0	0	0	0	1845	0	0	0	0	0	0	0	0	0	0	250	0	1472	0	0	1	1158	0
Bacteria;Actinobacteria;Coriobacteriia;Coriobacteriales;Eggerthellaceae;Eggerthella;	6196	373	65	277	112	24	0	896	37	24	63	174	30	1575	96	64	47	33	62	90	219	49	108	112	634	45	121	42	70	86	7	170	30	152	178	45	14	40	7	14	11
Bacteria;Firmicutes;Clostridia;Clostridiales;Lachnospiraceae;Tyzzerella;	5522	139	28	80	13	10	0	11	44	12	0	334	19	14	176	228	2	108	236	786	70	82	342	471	39	101	280	352	175	95	104	17	280	40	108	168	121	339	3	12	83
Bacteria;Firmicutes;Clostridia;Clostridiales;Ruminococcaceae;Oscillospira;	5344	186	135	73	160	12	0	4	423	108	14	53	18	7	24	32	11	52	125	28	41	272	1161	173	21	71	7	390	40	0	18	684	266	36	123	180	52	145	105	81	13
Bacteria;Firmicutes;Clostridia;Clostridiales;Ruminococcaceae;Butyricicoccus;	5061	73	22	222	240	85	0	152	24	34	55	206	70	552	195	64	39	81	578	233	239	60	36	30	36	42	64	105	105	100	50	585	66	22	130	99	34	69	149	93	22
Bacteria;Firmicutes;Firmicutes_unclassified;Firmicutes_unclassified;Firmicutes_unclassified;Firmicutes_unclassified;	4694	1172	85	849	173	439	5	17	575	6	0	69	12	3	10	126	11	22	7	4	522	64	36	39	25	4	10	114	3	5	12	0	46	114	62	19	0	2	15	10	7
Bacteria;Firmicutes;Clostridia;Clostridiales;Peptostreptococcaceae;Peptostreptococcaceae_unclassified;	4597	248	431	19	97	30	10	111	140	8	105	3	85	2	19	55	8	63	27	61	114	186	0	6	821	6	154	114	52	0	3	1330	209	43	4	2	17	1	4	9	0
Bacteria;Cyanobacteria;Oxyphotobacteria;Chloroplast;Chloroplast_fa;Chloroplast_ge;	3528	2	9	2	1610	0	5	0	5	7	4	1	0	6	8	23	1	90	557	6	32	0	10	39	2	0	2	746	1	2	4	1	1	67	210	43	4	23	1	3	1
Bacteria;Firmicutes;Erysipelotrichia;Erysipelotrichales;Erysipelotrichaceae;Faecalitalea;	3206	751	218	29	37	1	5	1158	0	11	12	6	54	4	55	15	2	11	3	36	116	61	4	1	294	0	18	101	25	14	1	21	16	2	20	23	3	64	8	4	2
Bacteria;Firmicutes;Clostridia;Clostridiales;Family_XIII;Family_XIII_unclassified;	3077	74	30	66	52	27	692	145	68	4	0	48	17	0	11	34	59	22	35	21	40	65	35	85	66	15	1053	34	8	7	7	13	27	37	69	39	2	6	11	19	34
Bacteria;Firmicutes;Negativicutes;Selenomonadales;Veillonellaceae;Veillonellaceae_unclassified;	2986	0	15	0	6	1	24	20	3	0	2	0	0	734	0	201	0	0	0	0	1943	3	0	4	2	0	1	0	0	4	0	0	22	0	0	0	0	0	0	1	0
Bacteria;Firmicutes;Clostridia;Clostridiales;Ruminococcaceae;Ruminococcaceae_NK4A214_group;	2276	30	14	105	1152	16	14	87	40	5	0	19	11	0	3	7	9	0	18	0	92	91	0	11	124	10	75	14	12	0	4	0	19	137	57	62	0	0	8	16	14
Bacteria;Firmicutes;Clostridia;Clostridiales;Clostridiaceae_1;Clostridiaceae_1_unclassified;	2225	299	397	26	2	14	6	31	22	101	10	0	57	0	1	5	0	3	0	2	59	67	16	2	336	5	14	15	30	0	14	633	0	16	4	1	27	0	2	8	0
Bacteria;Firmicutes;Clostridia;Clostridiales;Lachnospiraceae;Dorea;	2181	38	10	28	55	32	0	426	22	29	12	46	10	387	59	32	0	0	75	104	76	33	18	23	144	6	0	28	93	69	28	80	31	5	30	40	20	53	13	0	26
Bacteria;Firmicutes;Clostridia;Clostridiales;Lachnospiraceae;Coprococcus_1;	1977	85	34	254	0	38	0	207	37	0	0	106	23	111	20	22	0	0	120	0	67	113	24	41	162	3	71	14	25	95	27	39	114	0	38	64	0	18	0	5	0
Bacteria;Actinobacteria;Coriobacteriia;Coriobacteriales;Coriobacteriales_unclassified;Coriobacteriales_unclassified;	1752	1	5	125	0	45	0	30	20	0	0	42	12	0	75	87	26	0	258	7	108	0	0	96	295	4	0	181	20	0	0	0	117	90	47	50	0	10	0	1	0
Bacteria;Proteobacteria;Gammaproteobacteria;Pasteurellales;Pasteurellaceae;Pasteurellaceae_unclassified;	1657	71	1	0	0	0	0	0	268	8	470	22	35	1	66	137	0	58	12	0	4	160	2	4	3	0	1	15	8	55	3	67	157	3	1	0	1	0	1	18	5
Bacteria;Cyanobacteria;Melainabacteria;Melainabacteria_unclassified;Melainabacteria_unclassified;Melainabacteria_unclassified;	1434	1	761	0	0	0	0	0	0	0	0	1	1	0	0	0	0	0	0	0	0	0	1	496	0	0	3	2	0	0	0	0	168	0	0	0	0	0	0	0	0
Bacteria;Firmicutes;Clostridia;Clostridiales;Lachnospiraceae;Tyzzerella_3;	1377	0	0	0	131	0	0	11	0	0	0	0	0	374	0	15	0	0	155	0	0	0	97	0	0	0	47	0	38	253	89	0	76	0	91	0	0	0	0	0	0
Bacteria;Firmicutes;Clostridia;Clostridia_unclassified;Clostridia_unclassified;Clostridia_unclassified;	1362	349	0	205	109	83	0	0	72	0	0	4	19	0	9	49	0	0	0	0	187	0	0	30	35	0	0	48	31	0	0	0	0	27	66	0	0	0	0	16	23
Bacteria;Firmicutes;Bacilli;Lactobacillales;Lactobacillaceae;Lactobacillus;	1292	0	6	26	15	565	67	6	14	0	4	8	7	2	9	15	11	25	5	0	63	5	2	40	9	4	26	312	8	4	5	11	6	3	0	3	2	2	0	2	0
Bacteria;Firmicutes;Clostridia;Clostridiales;Clostridiaceae_1;Clostridium_sensu_stricto_1;	1111	16	312	0	2	6	69	38	18	15	0	0	42	0	1	15	0	11	1	2	19	14	5	4	60	1	2	265	11	0	0	1	0	131	4	0	1	0	0	45	0
Bacteria;Firmicutes;Erysipelotrichia;Erysipelotrichales;Erysipelotrichaceae;Erysipelatoclostridium;	979	0	0	95	47	14	3	38	0	19	46	197	21	5	0	46	35	42	32	13	0	25	9	1	0	4	7	36	29	25	5	31	19	16	13	6	32	38	2	4	24
Bacteria;Firmicutes;Negativicutes;Selenomonadales;Veillonellaceae;Megasphaera;	910	0	0	0	0	119	475	48	3	0	112	0	0	2	4	0	0	4	2	0	0	1	0	3	2	0	0	0	0	0	0	1	1	0	0	0	0	0	133	0	0
Bacteria;Firmicutes;Erysipelotrichia;Erysipelotrichales;Erysipelotrichaceae;Turicibacter;	804	23	138	0	0	1	0	1	2	77	0	392	21	0	1	1	3	0	0	0	62	3	1	0	39	0	5	12	5	0	2	13	0	0	0	0	0	0	0	2	0
Bacteria;Firmicutes;Clostridia;Clostridiales;Family_XIII;Anaerovorax;	749	0	124	0	0	0	0	366	45	0	0	0	0	0	3	0	0	0	0	0	0	0	0	4	147	0	1	37	0	0	0	0	0	0	0	16	0	0	0	6	0
Bacteria;Proteobacteria;Gammaproteobacteria;Enterobacteriales;Enterobacteriaceae;Klebsiella;	623	2	0	0	0	0	608	1	1	0	2	0	0	0	1	1	0	0	0	0	0	0	0	5	0	0	0	0	0	0	0	0	2	0	0	0	0	0	0	0	0
Bacteria;Proteobacteria;Deltaproteobacteria;Desulfovibrionales;Desulfovibrionaceae;Desulfovibrionaceae_unclassified;	530	0	2	73	13	1	20	0	0	0	0	0	78	0	31	51	0	0	2	0	0	7	0	34	0	0	0	3	0	0	0	0	2	4	16	4	0	70	0	116	3
Bacteria;Firmicutes;Clostridia;Clostridiales;Peptostreptococcaceae;Terrisporobacter;	528	20	60	0	0	6	0	26	56	14	0	0	24	0	1	0	0	4	12	0	3	20	0	2	64	0	0	2	6	0	0	162	39	1	0	2	0	0	0	4	0
Bacteria;Verrucomicrobia;Verrucomicrobiae;Opitutales;Puniceicoccaceae;Puniceicoccaceae_ge;	466	175	157	2	0	0	0	0	0	0	0	0	0	0	0	54	0	0	0	0	0	0	0	6	1	0	0	66	0	0	0	0	0	2	3	0	0	0	0	0	0
Bacteria;Firmicutes;Clostridia;Clostridiales;Family_XIII;Family_XIII_AD3011_group;	441	7	2	30	2	6	0	87	6	0	0	28	9	3	7	5	1	10	9	14	18	16	13	3	47	5	6	1	7	4	1	3	4	26	19	24	0	8	3	4	3
Bacteria;Firmicutes;Erysipelotrichia;Erysipelotrichales;Erysipelotrichaceae;Erysipelothrix;	428	1	0	11	39	5	0	9	2	6	0	23	3	1	3	9	0	5	7	13	0	6	13	17	23	3	106	7	13	52	4	0	5	0	3	0	16	15	0	8	0
Bacteria;Firmicutes;Clostridia;Clostridiales;Family_XIII;Family_XIII_ge;	423	20	15	43	55	22	0	1	0	4	0	17	5	0	0	6	20	5	1	0	31	14	0	6	14	0	14	1	4	0	0	0	4	101	10	2	0	0	6	1	1
Bacteria;Proteobacteria;Gammaproteobacteria;Betaproteobacteriales;Betaproteobacteriales_unclassified;Betaproteobacteriales_unclassified;	406	37	1	2	1	0	0	0	25	2	0	0	6	0	6	0	0	0	0	0	2	7	3	1	0	2	36	0	0	0	10	0	199	0	0	0	0	66	0	0	0
Bacteria;Firmicutes;Clostridia;Clostridiales;Christensenellaceae;uncultured;	380	12	13	31	14	25	0	23	8	1	0	34	3	0	2	21	11	11	3	5	13	18	5	4	37	2	5	7	1	0	1	0	22	13	14	7	0	1	4	7	2
Bacteria;Firmicutes;Erysipelotrichia;Erysipelotrichales;Erysipelotrichaceae;Catenibacterium;	346	0	0	0	0	0	0	0	133	0	0	0	0	0	0	0	0	0	0	0	196	0	0	0	17	0	0	0	0	0	0	0	0	0	0	0	0	0	0	0	0
Bacteria;Verrucomicrobia;Verrucomicrobiae;Verrucomicrobiae_unclassified;Verrucomicrobiae_unclassified;Verrucomicrobiae_unclassified;	319	1	0	1	13	1	14	0	3	0	0	1	2	1	0	3	0	0	10	1	1	0	0	0	8	0	8	0	3	0	0	1	44	0	140	0	1	54	0	1	7
Bacteria;Proteobacteria;Gammaproteobacteria;Enterobacteriales;Enterobacteriaceae;Raoultella;	314	0	0	0	0	0	0	0	0	0	0	0	0	0	267	0	0	0	0	0	0	0	0	0	45	0	1	0	0	0	0	0	1	0	0	0	0	0	0	0	0
Bacteria;Firmicutes;Bacilli;Lactobacillales;Enterococcaceae;Enterococcus;	303	1	0	0	22	0	115	0	0	0	4	0	10	0	23	0	50	1	0	0	0	12	9	0	0	1	2	15	38	0	0	0	0	0	0	0	0	0	0	0	0
Bacteria;Synergistetes;Synergistia;Synergistales;Synergistaceae;Synergistaceae_unclassified;	286	5	0	0	187	0	0	6	0	0	0	0	0	0	1	3	0	0	1	0	0	0	0	2	61	0	0	0	0	0	0	0	0	0	18	0	0	0	0	2	0
Bacteria;Proteobacteria;Alphaproteobacteria;Rickettsiales;Mitochondria;Mitochondria_ge;	285	2	4	2	147	0	0	0	2	0	0	0	0	0	1	1	1	4	45	0	3	0	2	2	3	0	0	50	0	0	0	0	0	1	4	8	0	2	1	0	0
Bacteria;Proteobacteria;Gammaproteobacteria;Pasteurellales;Pasteurellaceae;Haemophilus;	276	1	0	0	0	0	0	0	63	4	15	1	1	0	6	4	0	1	0	0	0	0	0	0	0	0	0	0	0	0	0	0	169	1	1	0	0	0	0	8	1
Bacteria;Verrucomicrobia;Verrucomicrobiae;Verrucomicrobiales;Verrucomicrobiales_unclassified;Verrucomicrobiales_unclassified;	215	2	0	1	22	0	16	0	6	0	0	1	0	0	0	4	0	1	2	1	1	0	0	0	11	0	26	0	2	0	0	0	30	0	55	0	0	32	0	0	2
Bacteria;Proteobacteria;Gammaproteobacteria;Enterobacteriales;Enterobacteriaceae;Proteus;	203	0	0	0	0	0	5	0	0	0	196	0	0	0	0	0	0	0	0	0	0	1	0	0	0	0	0	0	0	0	0	0	0	1	0	0	0	0	0	0	0
Bacteria;Cyanobacteria;Melainabacteria;Gastranaerophilales;Gastranaerophilales_fa;Gastranaerophilales_ge;	202	0	1	1	0	0	0	0	0	0	0	0	195	0	3	0	0	0	0	0	0	0	0	0	0	0	0	0	0	0	1	0	1	0	0	0	0	0	0	0	0
Bacteria;Fusobacteria;Fusobacteriia;Fusobacteriales;Fusobacteriaceae;Fusobacterium;	193	0	0	0	6	0	38	0	1	0	78	0	0	8	3	1	0	1	0	0	0	9	0	0	20	0	0	0	0	0	0	1	6	0	0	0	0	0	0	0	21
Bacteria;Firmicutes;Clostridia;Clostridiales;Peptostreptococcaceae;Paraclostridium;	171	1	0	0	0	7	0	0	0	162	0	0	1	0	0	0	0	0	0	0	0	0	0	0	0	0	0	0	0	0	0	0	0	0	0	0	0	0	0	0	0
Bacteria;Firmicutes;Clostridia;Clostridiales;Ruminococcaceae;uncultured;	156	86	0	0	35	0	0	0	0	0	0	0	0	0	0	35	0	0	0	0	0	0	0	0	0	0	0	0	0	0	0	0	0	0	0	0	0	0	0	0	0
Bacteria;Patescibacteria;Saccharimonadia;Saccharimonadales;Saccharimonadaceae;Saccharimonadaceae_ge;	155	1	1	2	20	1	0	24	25	0	0	8	7	13	0	2	0	2	2	2	2	5	0	8	5	0	0	0	6	3	0	0	8	0	3	2	0	2	0	0	1
Bacteria;Firmicutes;Clostridia;Clostridiales;Peptococcaceae;Peptococcaceae_unclassified;	153	27	0	9	56	2	0	1	0	0	0	5	0	0	0	3	0	2	0	0	17	0	0	0	0	5	0	1	0	0	0	0	0	1	0	20	0	0	0	4	0
Bacteria;Actinobacteria;Coriobacteriia;Coriobacteriales;Atopobiaceae;Atopobiaceae_unclassified;	148	0	0	0	1	0	0	34	1	0	2	0	0	0	2	3	82	1	0	0	1	0	0	1	3	0	1	8	0	0	0	2	1	0	2	0	0	3	0	0	0
Bacteria;Epsilonbacteraeota;Campylobacteria;Campylobacterales;Campylobacteraceae;Campylobacter;	142	2	0	0	0	0	0	0	1	0	111	0	1	0	0	0	0	1	0	1	0	5	0	0	1	0	0	0	5	3	0	4	4	0	0	0	0	0	0	3	0
Bacteria;Firmicutes;Clostridia;Clostridiales;Lachnospiraceae;Howardella;	118	0	21	0	0	0	0	0	0	0	0	0	0	0	0	0	0	0	0	0	0	0	0	0	85	0	0	12	0	0	0	0	0	0	0	0	0	0	0	0	0
Bacteria;Proteobacteria;Gammaproteobacteria;Enterobacteriales;Enterobacteriaceae;Kluyvera;	114	0	0	0	0	0	0	0	0	0	0	0	0	0	2	0	0	0	0	0	0	0	0	0	0	0	0	0	0	0	2	0	0	0	0	0	0	0	0	110	0
Bacteria;Actinobacteria;Actinobacteria;Actinomycetales;Actinomycetaceae;Actinomyces;	98	1	1	4	2	0	0	31	0	1	1	8	0	5	4	3	0	6	1	0	1	8	0	4	6	0	2	0	2	0	0	0	0	5	0	0	0	0	0	2	0
Bacteria;Proteobacteria;Gammaproteobacteria;Enterobacteriales;Enterobacteriaceae;Enterobacter;	92	0	0	0	0	0	0	0	0	0	1	0	0	0	0	0	0	2	0	0	0	0	0	26	0	0	1	0	0	0	0	0	62	0	0	0	0	0	0	0	0
Bacteria;Firmicutes;Bacilli;Lactobacillales;Streptococcaceae;Lactococcus;	81	0	0	1	0	0	22	14	0	0	1	0	5	0	0	3	0	0	0	0	9	1	4	3	0	0	1	9	0	0	0	0	7	0	0	0	0	1	0	0	0
Bacteria;Firmicutes;Bacilli;Lactobacillales;Lactobacillales_unclassified;Lactobacillales_unclassified;	79	1	1	4	1	0	1	3	1	0	7	0	0	2	9	7	0	13	3	0	2	5	0	0	3	0	1	2	0	0	0	7	1	0	1	0	2	0	1	0	1
Bacteria;Firmicutes;Clostridia;Clostridiales;Ruminococcaceae;Ruminococcaceae_UCG-008;	78	0	2	0	0	0	0	64	0	0	0	0	0	0	0	0	0	0	0	0	0	0	0	1	0	0	0	11	0	0	0	0	0	0	0	0	0	0	0	0	0
Bacteria;Firmicutes;Clostridia;Clostridiales;Lachnospiraceae;Anaerostipes;	77	1	1	1	2	0	0	3	0	0	7	1	0	4	0	0	0	6	3	14	0	0	2	1	0	0	3	0	0	5	0	4	4	0	3	3	0	1	1	0	7
Bacteria;Actinobacteria;Actinobacteria;Micrococcales;Micrococcaceae;Rothia;	76	0	0	2	4	0	5	4	1	0	1	0	0	0	18	10	0	2	0	0	2	4	1	0	0	0	0	12	0	0	0	0	2	8	0	0	0	0	0	0	0
Bacteria;Firmicutes;Erysipelotrichia;Erysipelotrichales;Erysipelotrichaceae;Coprobacillus;	67	0	0	1	2	0	0	0	2	0	0	0	0	12	0	6	0	0	0	0	0	8	2	7	14	2	0	0	2	0	3	0	0	1	0	0	0	0	0	5	0
Bacteria;Patescibacteria;Saccharimonadia;Saccharimonadales;Saccharimonadales_fa;Saccharimonadales_ge;	62	4	2	5	1	0	0	4	2	0	0	2	0	1	0	1	0	0	2	0	8	2	0	3	0	0	2	0	3	0	0	1	15	0	1	1	0	1	0	1	0
Bacteria;Firmicutes;Clostridia;Clostridiales;Lachnospiraceae;Epulopiscium;	57	0	10	0	0	0	0	0	0	0	0	0	0	0	0	0	0	0	0	0	20	0	0	0	23	0	0	0	4	0	0	0	0	0	0	0	0	0	0	0	0
Bacteria;Proteobacteria;Proteobacteria_unclassified;Proteobacteria_unclassified;Proteobacteria_unclassified;Proteobacteria_unclassified;	52	3	0	1	0	0	0	0	2	3	0	0	0	0	0	5	0	0	0	1	0	0	0	13	0	0	0	7	1	0	2	0	3	0	0	0	0	0	0	0	11
Bacteria;Firmicutes;Bacilli;Bacillales;Bacillales_unclassified;Bacillales_unclassified;	41	0	2	1	2	0	6	1	0	0	1	0	0	0	10	1	0	3	0	0	0	0	0	0	4	0	0	1	2	0	0	0	3	0	1	0	0	1	1	1	0
Bacteria;Bacteroidetes;Bacteroidia;Bacteroidales;Marinifilaceae;Marinifilaceae_unclassified;	40	0	1	0	0	1	0	0	2	0	0	0	2	0	1	0	0	0	1	0	5	4	1	1	0	0	1	8	0	0	0	0	1	0	1	4	0	3	0	1	2
Bacteria;Firmicutes;Negativicutes;Selenomonadales;Veillonellaceae;Selenomonas_3;	34	0	0	0	0	0	0	0	0	0	28	0	0	0	0	0	0	0	0	0	0	0	0	0	0	0	0	0	0	1	0	4	0	0	0	0	0	1	0	0	0
Bacteria;Bacteroidetes;Bacteroidia;Bacteroidales;Prevotellaceae;Prevotella_6;	33	0	0	0	0	0	0	0	0	0	0	0	0	0	0	0	0	0	0	0	0	0	0	0	31	0	0	0	0	0	0	0	0	1	0	1	0	0	0	0	0
Bacteria;Proteobacteria;Gammaproteobacteria;Pseudomonadales;Pseudomonadaceae;Pseudomonas;	33	0	0	0	0	0	0	0	3	0	0	0	1	0	0	7	0	0	2	0	0	15	0	4	0	0	0	0	0	0	0	0	1	0	0	0	0	0	0	0	0
Bacteria;Cyanobacteria;Cyanobacteria_unclassified;Cyanobacteria_unclassified;Cyanobacteria_unclassified;Cyanobacteria_unclassified;	32	0	0	0	0	0	0	0	0	0	0	0	5	0	0	0	0	0	18	0	0	0	0	0	0	0	0	2	0	0	0	0	6	0	1	0	0	0	0	0	0
Bacteria;Proteobacteria;Gammaproteobacteria;Gammaproteobacteria_unclassified;Gammaproteobacteria_unclassified;Gammaproteobacteria_unclassified;	32	0	0	1	0	0	1	0	2	0	0	0	0	0	0	26	0	0	0	0	0	0	0	0	0	0	0	0	0	0	1	0	0	0	0	0	0	0	0	1	0
Bacteria;Tenericutes;Mollicutes;Mollicutes_RF39;Mollicutes_RF39_fa;Mollicutes_RF39_ge;	31	0	6	4	0	0	0	0	0	3	0	0	0	0	0	0	0	0	16	0	0	0	0	0	2	0	0	0	0	0	0	0	0	0	0	0	0	0	0	0	0
Bacteria;Firmicutes;Clostridia;Clostridiales;Peptococcaceae;Peptococcus;	30	0	0	0	0	2	1	0	1	0	2	11	1	0	5	2	0	0	0	0	0	0	0	1	0	3	0	1	0	0	0	0	0	0	0	0	0	0	0	0	0
Bacteria;Synergistetes;Synergistia;Synergistales;Synergistaceae;uncultured;	30	0	0	0	0	0	0	0	0	1	0	0	0	0	0	0	0	0	0	0	0	0	0	23	0	0	0	0	0	0	0	0	0	0	6	0	0	0	0	0	0
Bacteria;Firmicutes;Bacilli;Lactobacillales;Leuconostocaceae;Leuconostoc;	25	0	0	1	0	0	0	1	0	0	0	0	0	0	14	0	1	0	1	0	0	1	2	0	1	0	0	2	0	0	0	0	0	0	0	0	0	0	1	0	0
Bacteria;Bacteroidetes;Bacteroidia;Bacteroidales;Rikenellaceae;Rikenellaceae_unclassified;	25	0	5	0	3	0	0	0	3	0	0	1	0	0	0	0	0	0	0	0	0	0	0	0	1	0	0	0	0	0	0	4	0	0	2	0	0	0	0	4	2
Bacteria;Firmicutes;Clostridia;Clostridiales;Eubacteriaceae;Eubacteriaceae_unclassified;	25	0	0	0	0	3	0	0	0	0	0	0	0	0	0	0	0	13	0	7	0	0	0	0	0	0	0	0	2	0	0	0	0	0	0	0	0	0	0	0	0
Bacteria;Firmicutes;Clostridia;Clostridiales;Peptostreptococcaceae;Peptostreptococcus;	21	0	0	0	0	0	0	0	0	0	2	0	0	0	0	0	0	0	0	0	0	1	0	0	15	0	0	0	0	0	0	0	3	0	0	0	0	0	0	0	0
Bacteria;Actinobacteria;Actinobacteria;Corynebacteriales;Corynebacteriaceae;Corynebacterium_1;	20	0	0	0	0	0	0	0	0	0	2	0	0	1	0	0	0	0	0	0	0	1	0	0	0	0	0	15	0	0	0	0	0	0	0	1	0	0	0	0	0
Bacteria;Firmicutes;Bacilli;Lactobacillales;Leuconostocaceae;Weissella;	18	0	0	0	1	0	0	0	0	0	0	0	1	0	0	0	0	2	0	0	0	1	7	0	0	0	0	0	0	0	5	0	0	0	0	0	0	0	0	0	1
Bacteria;Proteobacteria;Gammaproteobacteria;Betaproteobacteriales;Burkholderiaceae;Comamonas;	18	0	0	0	0	0	0	0	18	0	0	0	0	0	0	0	0	0	0	0	0	0	0	0	0	0	0	0	0	0	0	0	0	0	0	0	0	0	0	0	0
Bacteria;Bacteroidetes;Bacteroidia;Flavobacteriales;Flavobacteriaceae;Flavobacterium;	17	2	0	1	0	0	1	7	1	0	0	0	0	0	0	0	0	0	0	0	0	0	0	0	1	0	0	0	0	1	1	2	0	0	0	0	0	0	0	0	0
Bacteria;Proteobacteria;Gammaproteobacteria;Enterobacteriales;Enterobacteriaceae;Morganella;	17	0	0	0	0	0	5	0	4	0	0	0	0	0	0	4	0	0	0	0	0	2	0	0	0	0	0	0	0	0	0	0	0	0	0	0	0	2	0	0	0
Bacteria;Actinobacteria;Actinobacteria_unclassified;Actinobacteria_unclassified;Actinobacteria_unclassified;Actinobacteria_unclassified;	17	0	0	0	0	0	0	0	0	0	0	0	0	0	1	0	0	0	0	0	0	0	0	11	1	0	0	0	0	0	0	0	2	0	1	1	0	0	0	0	0
Bacteria;Firmicutes;Clostridia;Clostridiales;Lachnospiraceae;Coprococcus_3;	16	0	0	0	0	0	0	1	0	0	0	0	0	0	0	0	0	0	0	1	1	1	0	1	0	0	0	0	0	0	1	0	1	0	4	2	0	1	0	2	0
Bacteria;Firmicutes;Clostridia;Clostridiales;Syntrophomonadaceae;Syntrophomonas;	16	0	0	7	0	0	0	0	6	0	0	0	0	0	0	0	0	0	0	0	0	0	0	0	0	0	2	1	0	0	0	0	0	0	0	0	0	0	0	0	0
Bacteria;Patescibacteria;Saccharimonadia;Saccharimonadales;Saccharimonadales_unclassified;Saccharimonadales_unclassified;	16	0	0	1	1	2	0	2	0	0	1	1	1	0	0	0	0	0	1	0	2	0	1	0	0	0	0	0	1	0	0	0	0	0	0	1	0	0	0	1	0
Bacteria;Firmicutes;Clostridia;Clostridiales;Family_XI;Parvimonas;	14	0	0	0	0	0	0	0	0	0	1	0	0	1	0	3	0	0	1	0	0	4	0	0	3	0	0	1	0	0	0	0	0	0	0	0	0	0	0	0	0
Bacteria;Firmicutes;Erysipelotrichia;Erysipelotrichales;Erysipelotrichaceae;Solobacterium;	14	0	0	2	1	0	0	2	2	0	0	1	0	1	0	0	0	1	0	0	1	0	0	0	2	0	0	0	0	0	0	0	1	0	0	0	0	0	0	0	0
Bacteria;Firmicutes;Clostridia;Clostridiales;Clostridiaceae_1;Clostridium_sensu_stricto_13;	12	0	0	0	0	0	0	0	0	0	0	0	0	0	0	0	0	0	0	0	12	0	0	0	0	0	0	0	0	0	0	0	0	0	0	0	0	0	0	0	0
Bacteria;Firmicutes;Clostridia;Clostridiales;Lachnospiraceae;Lachnospiraceae_FCS020_group;	12	1	1	0	2	1	0	0	0	0	0	0	0	0	0	0	0	1	0	0	0	0	0	0	1	0	0	0	0	0	0	0	0	0	2	1	0	1	0	1	0
Bacteria;Tenericutes;Mollicutes;Anaeroplasmatales;Anaeroplasmataceae;Anaeroplasma;	12	0	4	0	0	0	0	0	7	0	0	0	0	0	0	0	0	0	0	0	0	0	1	0	0	0	0	0	0	0	0	0	0	0	0	0	0	0	0	0	0
Bacteria;Firmicutes;Bacilli;Bacillales;Staphylococcaceae;Staphylococcus;	11	0	0	0	0	0	0	0	0	0	0	0	0	0	0	1	0	0	0	0	0	0	0	0	0	0	0	10	0	0	0	0	0	0	0	0	0	0	0	0	0
Bacteria;Firmicutes;Clostridia;Clostridiales;Lachnospiraceae;Oribacterium;	11	0	0	2	0	0	0	1	0	0	2	0	0	2	0	1	0	0	0	0	0	1	0	0	1	0	0	0	1	0	0	0	0	0	0	0	0	0	0	0	0
Bacteria;Proteobacteria;Gammaproteobacteria;Betaproteobacteriales;Neisseriaceae;Neisseria;	11	1	0	0	0	0	2	0	0	0	0	0	0	0	0	0	0	4	0	0	0	1	0	0	0	0	0	0	0	3	0	0	0	0	0	0	0	0	0	0	0
Bacteria;Firmicutes;Clostridia;Clostridiales;Lachnospiraceae;Stomatobaculum;	10	0	0	0	0	0	0	5	0	0	0	0	0	0	0	0	0	1	0	1	0	2	0	0	0	0	0	0	0	0	0	1	0	0	0	0	0	0	0	0	0
Bacteria;Verrucomicrobia;Verrucomicrobiae;Verrucomicrobiales;Rubritaleaceae;Luteolibacter;	9	1	0	0	0	0	0	0	2	1	0	0	0	0	0	0	0	0	0	0	0	0	0	0	0	0	0	0	0	3	2	0	0	0	0	0	0	0	0	0	0
Bacteria;Firmicutes;Clostridia;Clostridiales;Ruminococcaceae;Ethanoligenens;	8	1	0	0	0	0	0	0	0	0	0	0	0	0	0	0	0	0	0	0	0	0	0	0	0	0	0	0	0	0	0	0	0	7	0	0	0	0	0	0	0
Bacteria;Proteobacteria;Gammaproteobacteria;Enterobacteriales;Enterobacteriaceae;Hafnia-Obesumbacterium;	8	0	0	0	1	0	0	0	0	0	0	0	0	0	0	0	0	0	0	0	0	0	0	0	0	0	0	0	0	0	0	0	7	0	0	0	0	0	0	0	0
Bacteria;Actinobacteria;Actinobacteria;Actinobacteria_unclassified;Actinobacteria_unclassified;Actinobacteria_unclassified;	8	0	1	0	0	0	0	0	0	0	1	3	0	0	0	0	0	0	0	0	1	1	0	0	0	0	0	0	0	0	0	0	0	0	1	0	0	0	0	0	0
Bacteria;Planctomycetes;Planctomycetacia;Planctomycetacia_unclassified;Planctomycetacia_unclassified;Planctomycetacia_unclassified;	7	0	0	0	0	0	0	0	1	1	1	3	0	0	0	0	0	0	0	0	0	0	0	0	0	0	0	0	0	0	1	0	0	0	0	0	0	0	0	0	0
Bacteria;Firmicutes;Bacilli;Lactobacillales;Carnobacteriaceae;Carnobacterium;	6	0	0	0	0	0	0	0	0	0	4	0	0	0	2	0	0	0	0	0	0	0	0	0	0	0	0	0	0	0	0	0	0	0	0	0	0	0	0	0	0
Bacteria;Proteobacteria;Gammaproteobacteria;Betaproteobacteriales;Burkholderiaceae;Rhodoferax;	6	0	1	0	0	0	1	0	0	0	1	0	0	0	0	0	0	0	0	0	0	0	1	1	0	0	0	0	0	0	0	1	0	0	0	0	0	0	0	0	0
Bacteria;Proteobacteria;Gammaproteobacteria;Enterobacteriales;Enterobacteriaceae;Citrobacter;	6	0	0	0	0	0	0	0	0	0	0	0	0	0	1	0	0	0	0	0	0	0	0	0	5	0	0	0	0	0	0	0	0	0	0	0	0	0	0	0	0
Bacteria;Proteobacteria;Gammaproteobacteria;Enterobacteriales;Enterobacteriaceae;Providencia;	6	0	0	0	0	2	0	0	0	0	0	0	3	0	0	0	0	0	0	0	0	0	0	0	0	0	0	0	0	0	0	1	0	0	0	0	0	0	0	0	0
Bacteria;Proteobacteria;Gammaproteobacteria;Pseudomonadales;Moraxellaceae;Acinetobacter;	6	0	0	0	0	0	0	0	2	0	0	0	0	0	0	0	0	0	0	0	0	0	0	0	0	0	0	4	0	0	0	0	0	0	0	0	0	0	0	0	0
Bacteria;Firmicutes;Negativicutes;Selenomonadales;Selenomonadales_unclassified;Selenomonadales_unclassified;	6	0	0	1	0	0	0	0	0	0	0	0	0	0	0	0	0	0	0	0	0	0	0	0	0	0	0	0	0	0	0	0	0	0	0	3	0	0	0	2	0
Bacteria;Proteobacteria;Alphaproteobacteria;Sphingomonadales;Sphingomonadaceae;Sphingomonadaceae_unclassified;	6	0	1	0	0	0	2	0	0	0	0	0	0	0	0	0	0	0	0	0	0	0	1	0	0	0	0	0	0	1	1	0	0	0	0	0	0	0	0	0	0
Bacteria;Firmicutes;Clostridia;Clostridiales;Family_XI;Finegoldia;	5	0	0	0	0	0	0	0	0	0	0	0	0	2	0	0	0	0	0	0	0	0	0	0	3	0	0	0	0	0	0	0	0	0	0	0	0	0	0	0	0
Bacteria;Nitrospirae;Nitrospira;Nitrospirales;Nitrospiraceae;Nitrospira;	5	0	1	1	0	0	0	0	0	1	0	2	0	0	0	0	0	0	0	0	0	0	0	0	0	0	0	0	0	0	0	0	0	0	0	0	0	0	0	0	0
Bacteria;Proteobacteria;Gammaproteobacteria;Betaproteobacteriales;Nitrosomonadaceae;Ellin6067;	5	0	0	0	1	0	1	0	1	0	0	0	0	0	0	0	0	0	0	0	0	0	0	0	1	0	0	0	0	1	0	0	0	0	0	0	0	0	0	0	0
Bacteria;Proteobacteria;Gammaproteobacteria;Betaproteobacteriales;Neisseriaceae;Neisseriaceae_unclassified;	5	0	0	0	0	0	0	0	0	0	0	0	0	0	0	0	0	0	0	0	0	4	0	0	0	0	0	0	0	0	0	0	1	0	0	0	0	0	0	0	0
Bacteria;Actinobacteria;Actinobacteria;Bifidobacteriales;Bifidobacteriaceae;Scardovia;	4	0	0	0	0	0	0	0	0	1	0	0	0	0	0	0	0	0	0	0	0	0	0	0	0	0	1	0	0	0	0	0	0	2	0	0	0	0	0	0	0
Bacteria;Firmicutes;Clostridia;Clostridiales;Clostridiaceae_1;Clostridium_sensu_stricto_12;	4	0	0	0	0	0	0	0	0	1	1	0	1	0	0	0	0	0	0	0	0	0	0	0	0	0	0	0	0	0	0	1	0	0	0	0	0	0	0	0	0
Bacteria;Firmicutes;Clostridia;Clostridiales;Family_XI;Peptoniphilus;	4	0	0	0	0	0	0	0	0	0	0	0	0	0	2	0	0	0	0	0	0	0	0	0	1	0	0	0	1	0	0	0	0	0	0	0	0	0	0	0	0
Bacteria;Proteobacteria;Gammaproteobacteria;Betaproteobacteriales;Burkholderiaceae;Schlegelella;	4	0	0	0	0	0	0	0	0	0	0	0	0	0	0	0	0	0	0	0	0	0	3	0	0	0	0	0	0	0	0	0	0	0	1	0	0	0	0	0	0
Bacteria;Bacteroidetes;Bacteroidia;Chitinophagales;Chitinophagaceae;Chitinophagaceae_unclassified;	4	0	0	0	0	0	1	0	0	0	1	0	0	0	0	0	0	0	0	0	0	0	0	0	1	0	0	0	0	1	0	0	0	0	0	0	0	0	0	0	0
Bacteria;Firmicutes;Clostridia;Clostridiales;Family_XI;Family_XI_unclassified;	4	0	0	0	0	0	0	0	0	0	0	0	0	0	0	0	0	0	0	0	0	1	0	0	2	0	0	0	0	0	0	0	0	0	0	0	0	0	0	0	1
Bacteria;Firmicutes;Negativicutes;Selenomonadales;Acidaminococcaceae;uncultured;	4	0	0	0	0	0	0	0	0	0	0	0	0	0	0	0	0	0	0	0	0	0	0	0	0	0	0	0	0	0	0	0	0	0	0	1	0	0	0	3	0
Bacteria;Gemmatimonadetes;Gemmatimonadetes;Gemmatimonadales;Gemmatimonadaceae;uncultured;	4	0	0	0	0	0	0	0	1	1	1	0	0	0	0	0	0	0	0	0	0	0	0	0	0	0	0	0	0	0	0	1	0	0	0	0	0	0	0	0	0
Bacteria;Verrucomicrobia;Verrucomicrobiae;Opitutales;Puniceicoccaceae;Puniceicoccaceae_unclassified;	4	0	3	0	0	0	0	0	0	0	0	0	0	0	0	0	0	0	0	0	0	0	0	0	0	0	0	1	0	0	0	0	0	0	0	0	0	0	0	0	0
Bacteria;Actinobacteria;Coriobacteriia;Coriobacteriales;Atopobiaceae;Olsenella;	3	0	0	0	1	0	0	0	0	0	1	0	0	0	0	0	0	0	0	0	1	0	0	0	0	0	0	0	0	0	0	0	0	0	0	0	0	0	0	0	0
Bacteria;Bacteroidetes;Bacteroidia;Cytophagales;Spirosomaceae;Arcicella;	3	0	0	0	0	0	0	0	0	2	0	0	0	0	0	0	0	0	0	0	0	0	0	0	0	0	0	0	0	0	1	0	0	0	0	0	0	0	0	0	0
Bacteria;Bacteroidetes;Bacteroidia;Sphingobacteriales;env.OPS_17;env.OPS_17_ge;	3	0	0	0	0	0	0	0	1	0	0	0	0	0	0	0	0	0	2	0	0	0	0	0	0	0	0	0	0	0	0	0	0	0	0	0	0	0	0	0	0
Bacteria;Firmicutes;Clostridia;Clostridiales;Lachnospiraceae;Herbinix;	3	0	0	0	0	0	0	0	2	0	0	0	0	0	0	0	0	0	0	1	0	0	0	0	0	0	0	0	0	0	0	0	0	0	0	0	0	0	0	0	0
Bacteria;Firmicutes;Clostridia;Clostridiales;Lachnospiraceae;Lachnoanaerobaculum;	3	0	0	0	0	0	0	1	0	0	0	0	0	2	0	0	0	0	0	0	0	0	0	0	0	0	0	0	0	0	0	0	0	0	0	0	0	0	0	0	0
Bacteria;Firmicutes;Clostridia;Clostridiales;Ruminococcaceae;Hydrogenoanaerobacterium;	3	0	0	0	0	2	0	0	0	0	0	0	0	0	0	0	1	0	0	0	0	0	0	0	0	0	0	0	0	0	0	0	0	0	0	0	0	0	0	0	0
Bacteria;Planctomycetes;Planctomycetacia;Pirellulales;Pirellulaceae;Pirellula;	3	1	0	0	0	0	0	0	1	0	0	0	0	0	0	0	0	0	0	0	0	0	1	0	0	0	0	0	0	0	0	0	0	0	0	0	0	0	0	0	0
Bacteria;Proteobacteria;Alphaproteobacteria;Caulobacterales;Caulobacteraceae;Brevundimonas;	3	0	0	0	0	0	0	3	0	0	0	0	0	0	0	0	0	0	0	0	0	0	0	0	0	0	0	0	0	0	0	0	0	0	0	0	0	0	0	0	0
Bacteria;Proteobacteria;Alphaproteobacteria;Sphingomonadales;Sphingomonadaceae;Novosphingobium;	3	0	0	0	1	0	0	0	0	0	0	0	0	0	0	0	0	0	0	0	1	0	0	0	0	0	0	0	0	1	0	0	0	0	0	0	0	0	0	0	0
Bacteria;Proteobacteria;Gammaproteobacteria;Xanthomonadales;Xanthomonadaceae;Arenimonas;	3	1	1	0	0	0	0	0	0	0	0	1	0	0	0	0	0	0	0	0	0	0	0	0	0	0	0	0	0	0	0	0	0	0	0	0	0	0	0	0	0
Bacteria;Acidobacteria;Acidobacteria_unclassified;Acidobacteria_unclassified;Acidobacteria_unclassified;Acidobacteria_unclassified;	3	0	0	0	0	0	0	0	0	1	0	2	0	0	0	0	0	0	0	0	0	0	0	0	0	0	0	0	0	0	0	0	0	0	0	0	0	0	0	0	0
Bacteria;Actinobacteria;Actinobacteria;Bifidobacteriales;Bifidobacteriaceae;Bifidobacteriaceae_unclassified;	3	0	0	0	2	0	0	0	0	0	0	0	0	0	0	0	0	0	0	0	0	0	0	0	0	0	0	0	0	0	0	0	0	0	1	0	0	0	0	0	0
Bacteria;Planctomycetes;Planctomycetacia;Gemmatales;Gemmataceae;Gemmataceae_unclassified;	3	0	0	0	0	0	0	0	0	1	0	0	0	0	0	0	0	0	0	0	0	0	0	0	0	0	0	0	0	1	1	0	0	0	0	0	0	0	0	0	0
Bacteria;Proteobacteria;Alphaproteobacteria;Rhodobacterales;Rhodobacteraceae;Rhodobacteraceae_unclassified;	3	0	0	0	0	1	0	0	0	0	1	0	0	0	0	0	0	0	0	0	0	0	0	0	0	0	0	0	0	0	1	0	0	0	0	0	0	0	0	0	0
Bacteria;Proteobacteria;Gammaproteobacteria;Xanthomonadales;Xanthomonadaceae;Xanthomonadaceae_unclassified;	3	1	0	0	0	0	0	0	2	0	0	0	0	0	0	0	0	0	0	0	0	0	0	0	0	0	0	0	0	0	0	0	0	0	0	0	0	0	0	0	0
Bacteria;Actinobacteria;Actinobacteria;Micrococcales;Micrococcaceae;Arthrobacter;	2	0	0	0	0	0	1	0	0	0	0	0	0	0	0	0	0	0	0	0	0	0	0	0	0	0	0	0	0	0	0	0	1	0	0	0	0	0	0	0	0
Bacteria;Bacteroidetes;Bacteroidia;Bacteroidales;Porphyromonadaceae;Porphyromonas;	2	0	0	0	0	0	0	0	0	0	0	0	1	0	0	0	0	0	0	0	0	0	0	0	1	0	0	0	0	0	0	0	0	0	0	0	0	0	0	0	0
Bacteria;Firmicutes;Clostridia;Clostridiales;Clostridiaceae_1;Sarcina;	2	0	0	0	0	0	0	0	0	0	0	0	0	0	0	1	0	0	0	0	0	0	0	0	0	0	0	0	0	0	0	0	0	1	0	0	0	0	0	0	0
Bacteria;Firmicutes;Clostridia;Clostridiales;Peptostreptococcaceae;Clostridioides;	2	0	0	0	0	0	0	0	0	0	0	0	0	0	0	0	0	0	0	0	0	0	0	0	1	0	0	0	0	0	0	1	0	0	0	0	0	0	0	0	0
Bacteria;Firmicutes;Negativicutes;Selenomonadales;Veillonellaceae;Selenomonas_4;	2	0	0	0	0	1	0	0	0	0	1	0	0	0	0	0	0	0	0	0	0	0	0	0	0	0	0	0	0	0	0	0	0	0	0	0	0	0	0	0	0
Bacteria;Patescibacteria;Gracilibacteria;JGI_0000069-P22;JGI_0000069-P22_fa;JGI_0000069-P22_ge;	2	0	0	0	0	0	0	0	2	0	0	0	0	0	0	0	0	0	0	0	0	0	0	0	0	0	0	0	0	0	0	0	0	0	0	0	0	0	0	0	0
Bacteria;Patescibacteria;Saccharimonadia;Saccharimonadales;Saccharimonadaceae;Candidatus_Saccharimonas;	2	0	0	0	0	0	0	0	1	0	1	0	0	0	0	0	0	0	0	0	0	0	0	0	0	0	0	0	0	0	0	0	0	0	0	0	0	0	0	0	0
Bacteria;Proteobacteria;Alphaproteobacteria;Rhizobiales;Beijerinckiaceae;Bosea;	2	0	0	0	0	0	0	2	0	0	0	0	0	0	0	0	0	0	0	0	0	0	0	0	0	0	0	0	0	0	0	0	0	0	0	0	0	0	0	0	0
Bacteria;Proteobacteria;Alphaproteobacteria;Rhizobiales;Devosiaceae;Devosia;	2	1	0	0	0	0	0	0	0	0	0	0	0	1	0	0	0	0	0	0	0	0	0	0	0	0	0	0	0	0	0	0	0	0	0	0	0	0	0	0	0
Bacteria;Proteobacteria;Alphaproteobacteria;Rhodobacterales;Rhodobacteraceae;Rhodobacter;	2	0	0	0	0	0	0	0	2	0	0	0	0	0	0	0	0	0	0	0	0	0	0	0	0	0	0	0	0	0	0	0	0	0	0	0	0	0	0	0	0
Bacteria;Proteobacteria;Alphaproteobacteria;Sphingomonadales;Sphingomonadaceae;Sphingorhabdus;	2	0	1	0	0	0	1	0	0	0	0	0	0	0	0	0	0	0	0	0	0	0	0	0	0	0	0	0	0	0	0	0	0	0	0	0	0	0	0	0	0
Bacteria;Proteobacteria;Gammaproteobacteria;Aeromonadales;Aeromonadaceae;Aeromonas;	2	0	0	0	0	0	0	0	2	0	0	0	0	0	0	0	0	0	0	0	0	0	0	0	0	0	0	0	0	0	0	0	0	0	0	0	0	0	0	0	0
Bacteria;Proteobacteria;Gammaproteobacteria;Betaproteobacteriales;Burkholderiaceae;Delftia;	2	0	0	0	0	1	0	0	0	0	0	0	0	0	0	0	0	0	0	0	0	0	0	0	0	0	0	0	0	0	1	0	0	0	0	0	0	0	0	0	0
Bacteria;Proteobacteria;Gammaproteobacteria;Betaproteobacteriales;Methylophilaceae;Methylotenera;	2	1	0	0	0	0	0	0	0	0	0	0	0	0	0	0	0	0	0	0	0	0	0	0	0	0	0	0	0	0	0	1	0	0	0	0	0	0	0	0	0
Bacteria;Proteobacteria;Gammaproteobacteria;Betaproteobacteriales;Nitrosomonadaceae;MND1;	2	0	0	0	0	0	0	0	0	0	0	1	0	0	1	0	0	0	0	0	0	0	0	0	0	0	0	0	0	0	0	0	0	0	0	0	0	0	0	0	0
Bacteria;Proteobacteria;Gammaproteobacteria;Betaproteobacteriales;TRA3-20;TRA3-20_ge;	2	0	0	0	0	0	0	1	0	0	0	0	0	0	0	0	1	0	0	0	0	0	0	0	0	0	0	0	0	0	0	0	0	0	0	0	0	0	0	0	0
Bacteria;Proteobacteria;Gammaproteobacteria;Pasteurellales;Pasteurellaceae;Aggregatibacter;	2	0	0	0	0	0	0	0	0	0	0	1	0	0	0	0	0	0	0	0	0	0	0	0	0	0	0	0	0	0	0	0	1	0	0	0	0	0	0	0	0
Bacteria;Proteobacteria;Gammaproteobacteria;Pseudomonadales;Moraxellaceae;Psychrobacter;	2	0	0	0	0	0	0	0	0	0	2	0	0	0	0	0	0	0	0	0	0	0	0	0	0	0	0	0	0	0	0	0	0	0	0	0	0	0	0	0	0
Bacteria;Actinobacteria;Actinobacteria;Micrococcales;Micrococcales_unclassified;Micrococcales_unclassified;	2	0	0	0	0	0	0	0	0	0	1	0	0	0	0	0	0	0	0	0	1	0	0	0	0	0	0	0	0	0	0	0	0	0	0	0	0	0	0	0	0
Bacteria;Bacteroidetes;Bacteroidia;Cytophagales;Microscillaceae;uncultured;	2	0	1	0	1	0	0	0	0	0	0	0	0	0	0	0	0	0	0	0	0	0	0	0	0	0	0	0	0	0	0	0	0	0	0	0	0	0	0	0	0
Bacteria;Firmicutes;Bacilli;Bacilli_unclassified;Bacilli_unclassified;Bacilli_unclassified;	2	0	0	0	0	0	0	0	0	0	0	0	0	0	2	0	0	0	0	0	0	0	0	0	0	0	0	0	0	0	0	0	0	0	0	0	0	0	0	0	0
Bacteria;Firmicutes;Bacilli;Lactobacillales;Enterococcaceae;Enterococcaceae_unclassified;	2	0	0	0	0	0	1	0	0	0	1	0	0	0	0	0	0	0	0	0	0	0	0	0	0	0	0	0	0	0	0	0	0	0	0	0	0	0	0	0	0
Bacteria;Patescibacteria;Parcubacteria;Parcubacteria_unclassified;Parcubacteria_unclassified;Parcubacteria_unclassified;	2	0	0	0	0	0	0	0	0	0	0	0	0	0	0	0	0	0	0	0	0	0	0	0	2	0	0	0	0	0	0	0	0	0	0	0	0	0	0	0	0
Bacteria;Planctomycetes;Planctomycetacia;Planctomycetales;uncultured;uncultured_ge;	2	0	0	0	0	0	0	0	0	0	0	0	0	0	0	0	0	0	0	0	0	0	0	0	1	0	0	0	0	0	1	0	0	0	0	0	0	0	0	0	0
Bacteria;Proteobacteria;Deltaproteobacteria;Desulfovibrionales;Desulfovibrionales_unclassified;Desulfovibrionales_unclassified;	2	0	0	0	0	0	0	0	0	0	0	0	1	0	0	1	0	0	0	0	0	0	0	0	0	0	0	0	0	0	0	0	0	0	0	0	0	0	0	0	0
Bacteria;Verrucomicrobia;Verrucomicrobiae;Pedosphaerales;Pedosphaeraceae;Pedosphaeraceae_unclassified;	2	0	1	0	0	0	0	0	0	0	0	0	0	0	0	0	0	0	0	0	0	0	0	0	1	0	0	0	0	0	0	0	0	0	0	0	0	0	0	0	0
Bacteria;Acidobacteria;Acidobacteriia;Solibacterales;Solibacteraceae_(Subgroup_3);Bryobacter;	1	0	0	0	0	0	0	0	0	0	0	0	0	0	0	0	0	0	0	0	0	0	0	0	0	0	0	0	0	0	1	0	0	0	0	0	0	0	0	0	0
Bacteria;Acidobacteria;Blastocatellia_(Subgroup_4);Blastocatellales;Blastocatellaceae;JGI_0001001-H03;	1	0	0	0	0	0	1	0	0	0	0	0	0	0	0	0	0	0	0	0	0	0	0	0	0	0	0	0	0	0	0	0	0	0	0	0	0	0	0	0	0
Bacteria;Acidobacteria;Blastocatellia_(Subgroup_4);Pyrinomonadales;Pyrinomonadaceae;RB41;	1	0	0	0	0	0	0	0	0	0	0	0	0	0	0	0	0	0	1	0	0	0	0	0	0	0	0	0	0	0	0	0	0	0	0	0	0	0	0	0	0
Bacteria;Acidobacteria;Subgroup_5;Subgroup_5_or;Subgroup_5_fa;Subgroup_5_ge;	1	0	0	0	1	0	0	0	0	0	0	0	0	0	0	0	0	0	0	0	0	0	0	0	0	0	0	0	0	0	0	0	0	0	0	0	0	0	0	0	0
Bacteria;Acidobacteria;Subgroup_6;Subgroup_6_or;Subgroup_6_fa;Subgroup_6_ge;	1	0	0	0	0	0	0	0	0	0	0	0	0	0	0	0	0	0	0	0	0	0	0	0	0	0	0	0	0	0	0	1	0	0	0	0	0	0	0	0	0
Bacteria;Actinobacteria;Actinobacteria;Micrococcales;Cellulomonadaceae;Tropheryma;	1	0	0	0	0	0	0	0	0	0	0	0	0	0	0	0	0	0	0	0	0	0	0	0	0	0	1	0	0	0	0	0	0	0	0	0	0	0	0	0	0
Bacteria;Actinobacteria;Actinobacteria;Micrococcales;Intrasporangiaceae;Tetrasphaera;	1	0	0	0	0	0	0	0	1	0	0	0	0	0	0	0	0	0	0	0	0	0	0	0	0	0	0	0	0	0	0	0	0	0	0	0	0	0	0	0	0
Bacteria;Actinobacteria;Coriobacteriia;Coriobacteriales;Atopobiaceae;Atopobium;	1	0	0	0	0	0	0	0	0	0	0	0	0	0	0	0	0	0	0	0	0	0	0	0	1	0	0	0	0	0	0	0	0	0	0	0	0	0	0	0	0
Bacteria;Bacteroidetes;Bacteroidia;Bacteroidales;Prevotellaceae;Prevotella;	1	0	0	0	0	0	0	0	0	0	0	0	0	0	0	0	0	0	0	0	0	0	0	0	1	0	0	0	0	0	0	0	0	0	0	0	0	0	0	0	0
Bacteria;Bacteroidetes;Bacteroidia;Bacteroidales;Prevotellaceae;Prevotella_1;	1	0	0	0	0	0	0	0	0	0	0	0	0	0	0	0	0	0	0	0	1	0	0	0	0	0	0	0	0	0	0	0	0	0	0	0	0	0	0	0	0
Bacteria;Bacteroidetes;Bacteroidia;Chitinophagales;Chitinophagaceae;Ferruginibacter;	1	0	0	0	0	0	0	0	0	0	0	0	0	0	0	0	0	0	0	0	0	0	0	0	0	0	0	0	0	1	0	0	0	0	0	0	0	0	0	0	0
Bacteria;Bacteroidetes;Bacteroidia;Cytophagales;Spirosomaceae;Emticicia;	1	0	0	0	0	0	0	0	1	0	0	0	0	0	0	0	0	0	0	0	0	0	0	0	0	0	0	0	0	0	0	0	0	0	0	0	0	0	0	0	0
Bacteria;Bacteroidetes;Bacteroidia;Flavobacteriales;Weeksellaceae;Chryseobacterium;	1	0	0	0	0	0	0	0	0	0	1	0	0	0	0	0	0	0	0	0	0	0	0	0	0	0	0	0	0	0	0	0	0	0	0	0	0	0	0	0	0
Bacteria;Bacteroidetes;Bacteroidia;Sphingobacteriales;Sphingobacteriaceae;Pedobacter;	1	0	0	0	0	0	0	0	0	0	0	0	0	0	0	0	0	0	0	0	0	0	0	0	0	0	0	0	0	0	0	1	0	0	0	0	0	0	0	0	0
Bacteria;Chloroflexi;Anaerolineae;Anaerolineales;Anaerolineaceae;Flexilinea;	1	0	0	0	0	0	0	0	0	0	0	0	0	0	0	0	0	0	0	0	0	0	0	0	0	0	0	0	1	0	0	0	0	0	0	0	0	0	0	0	0
Bacteria;Firmicutes;Bacilli;Lactobacillales;Carnobacteriaceae;Trichococcus;	1	0	0	0	0	0	0	1	0	0	0	0	0	0	0	0	0	0	0	0	0	0	0	0	0	0	0	0	0	0	0	0	0	0	0	0	0	0	0	0	0
Bacteria;Firmicutes;Bacilli;Lactobacillales;Lactobacillaceae;Pediococcus;	1	0	0	0	0	0	0	0	0	0	0	0	0	0	0	0	0	0	0	0	0	0	0	1	0	0	0	0	0	0	0	0	0	0	0	0	0	0	0	0	0
Bacteria;Firmicutes;Clostridia;Clostridiales;Family_XI;Anaerococcus;	1	0	0	0	0	0	0	0	0	0	0	0	0	0	0	0	0	0	0	0	0	0	0	0	1	0	0	0	0	0	0	0	0	0	0	0	0	0	0	0	0
Bacteria;Firmicutes;Clostridia;Clostridiales;Lachnospiraceae;Cellulosilyticum;	1	0	0	0	0	0	0	0	0	1	0	0	0	0	0	0	0	0	0	0	0	0	0	0	0	0	0	0	0	0	0	0	0	0	0	0	0	0	0	0	0
Bacteria;Firmicutes;Clostridia;Clostridiales;Lachnospiraceae;FD2005;	1	0	0	0	0	0	0	0	0	0	0	0	0	0	1	0	0	0	0	0	0	0	0	0	0	0	0	0	0	0	0	0	0	0	0	0	0	0	0	0	0
Bacteria;Firmicutes;Clostridia;Clostridiales;Lachnospiraceae;Lachnospiraceae_NK4A136_group;	1	0	0	0	0	0	0	0	0	0	0	0	0	0	0	0	0	0	0	0	0	0	0	0	0	0	0	1	0	0	0	0	0	0	0	0	0	0	0	0	0
Bacteria;Omnitrophicaeota;Omnitrophicaeota_cl;Omnitrophicaeota_or;Omnitrophicaeota_fa;Omnitrophicaeota_ge;	1	0	0	0	1	0	0	0	0	0	0	0	0	0	0	0	0	0	0	0	0	0	0	0	0	0	0	0	0	0	0	0	0	0	0	0	0	0	0	0	0
Bacteria;Planctomycetes;Phycisphaerae;Tepidisphaerales;WD2101_soil_group;WD2101_soil_group_ge;	1	0	0	0	0	0	0	1	0	0	0	0	0	0	0	0	0	0	0	0	0	0	0	0	0	0	0	0	0	0	0	0	0	0	0	0	0	0	0	0	0
Bacteria;Proteobacteria;Alphaproteobacteria;Rhizobiales;Hyphomicrobiaceae;Hyphomicrobium;	1	0	0	0	0	0	0	0	0	0	0	0	0	0	0	0	0	0	0	0	0	0	0	0	0	0	0	1	0	0	0	0	0	0	0	0	0	0	0	0	0
Bacteria;Proteobacteria;Alphaproteobacteria;Sphingomonadales;Sphingomonadaceae;Sphingomonas;	1	0	0	0	0	0	0	1	0	0	0	0	0	0	0	0	0	0	0	0	0	0	0	0	0	0	0	0	0	0	0	0	0	0	0	0	0	0	0	0	0
Bacteria;Proteobacteria;Alphaproteobacteria;Sphingomonadales;Sphingomonadaceae;Sphingopyxis;	1	0	0	0	0	0	0	1	0	0	0	0	0	0	0	0	0	0	0	0	0	0	0	0	0	0	0	0	0	0	0	0	0	0	0	0	0	0	0	0	0
Bacteria;Proteobacteria;Deltaproteobacteria;RCP2-54;RCP2-54_fa;RCP2-54_ge;	1	1	0	0	0	0	0	0	0	0	0	0	0	0	0	0	0	0	0	0	0	0	0	0	0	0	0	0	0	0	0	0	0	0	0	0	0	0	0	0	0
Bacteria;Proteobacteria;Gammaproteobacteria;Betaproteobacteriales;Burkholderiaceae;Aquabacterium;	1	0	0	0	0	0	0	0	0	0	0	0	0	0	0	0	0	0	0	0	0	0	1	0	0	0	0	0	0	0	0	0	0	0	0	0	0	0	0	0	0
Bacteria;Proteobacteria;Gammaproteobacteria;Betaproteobacteriales;Burkholderiaceae;Diaphorobacter;	1	0	0	0	0	0	0	0	1	0	0	0	0	0	0	0	0	0	0	0	0	0	0	0	0	0	0	0	0	0	0	0	0	0	0	0	0	0	0	0	0
Bacteria;Proteobacteria;Gammaproteobacteria;Betaproteobacteriales;Burkholderiaceae;Massilia;	1	0	0	0	0	0	0	1	0	0	0	0	0	0	0	0	0	0	0	0	0	0	0	0	0	0	0	0	0	0	0	0	0	0	0	0	0	0	0	0	0
Bacteria;Proteobacteria;Gammaproteobacteria;Betaproteobacteriales;Burkholderiaceae;Polaromonas;	1	0	0	0	0	0	0	0	0	0	0	0	0	0	0	0	0	0	0	0	0	0	0	0	0	0	0	0	0	1	0	0	0	0	0	0	0	0	0	0	0
Bacteria;Proteobacteria;Gammaproteobacteria;Betaproteobacteriales;Nitrosomonadaceae;IS-44;	1	0	0	0	0	0	0	0	0	0	0	1	0	0	0	0	0	0	0	0	0	0	0	0	0	0	0	0	0	0	0	0	0	0	0	0	0	0	0	0	0
Bacteria;Proteobacteria;Gammaproteobacteria;Betaproteobacteriales;Nitrosomonadaceae;Nitrosospira;	1	0	0	0	0	0	0	0	0	0	1	0	0	0	0	0	0	0	0	0	0	0	0	0	0	0	0	0	0	0	0	0	0	0	0	0	0	0	0	0	0
Bacteria;Proteobacteria;Gammaproteobacteria;Betaproteobacteriales;SC-I-84;SC-I-84_ge;	1	0	0	0	0	0	0	0	0	0	0	0	0	1	0	0	0	0	0	0	0	0	0	0	0	0	0	0	0	0	0	0	0	0	0	0	0	0	0	0	0
Bacteria;Proteobacteria;Gammaproteobacteria;Oceanospirillales;Halomonadaceae;Cobetia;	1	0	1	0	0	0	0	0	0	0	0	0	0	0	0	0	0	0	0	0	0	0	0	0	0	0	0	0	0	0	0	0	0	0	0	0	0	0	0	0	0
Bacteria;Proteobacteria;Gammaproteobacteria;Xanthomonadales;Xanthomonadaceae;Stenotrophomonas;	1	0	0	0	0	0	0	0	0	0	0	0	0	0	0	0	0	0	0	0	0	0	0	0	0	0	0	0	0	0	0	0	1	0	0	0	0	0	0	0	0
Bacteria;Synergistetes;Synergistia;Synergistales;Synergistaceae;Fretibacterium;	1	0	0	0	0	0	0	0	0	0	0	0	0	0	0	0	0	0	0	0	0	0	0	0	0	0	0	0	0	0	0	0	1	0	0	0	0	0	0	0	0
Bacteria;Verrucomicrobia;Verrucomicrobiae;Pedosphaerales;Pedosphaeraceae;Pedosphaeraceae_ge;	1	0	0	0	0	0	0	0	0	0	0	0	0	0	0	0	0	0	0	0	0	0	0	0	0	0	0	0	0	0	0	1	0	0	0	0	0	0	0	0	0
Bacteria;Acidobacteria;Blastocatellia_(Subgroup_4);Blastocatellales;Blastocatellaceae;Blastocatellaceae_unclassified;	1	0	0	0	0	0	0	0	0	0	1	0	0	0	0	0	0	0	0	0	0	0	0	0	0	0	0	0	0	0	0	0	0	0	0	0	0	0	0	0	0
Bacteria;Acidobacteria;Subgroup_6;Subgroup_6_unclassified;Subgroup_6_unclassified;Subgroup_6_unclassified;	1	1	0	0	0	0	0	0	0	0	0	0	0	0	0	0	0	0	0	0	0	0	0	0	0	0	0	0	0	0	0	0	0	0	0	0	0	0	0	0	0
Bacteria;Acidobacteria;Subgroup_6;Unknown_Order;Unknown_Family;Unknown_Family_unclassified;	1	0	0	0	0	0	0	0	0	0	0	0	0	0	0	0	0	0	0	0	0	0	0	0	0	0	0	0	0	1	0	0	0	0	0	0	0	0	0	0	0
Bacteria;Actinobacteria;Acidimicrobiia;Acidimicrobiia_unclassified;Acidimicrobiia_unclassified;Acidimicrobiia_unclassified;	1	0	0	0	0	0	0	0	0	0	0	0	0	0	0	0	0	0	0	0	0	0	0	0	0	0	0	0	0	0	1	0	0	0	0	0	0	0	0	0	0
Bacteria;Actinobacteria;Actinobacteria;Micrococcales;Microbacteriaceae;Microbacteriaceae_unclassified;	1	0	0	0	0	0	0	0	0	0	0	0	1	0	0	0	0	0	0	0	0	0	0	0	0	0	0	0	0	0	0	0	0	0	0	0	0	0	0	0	0
Bacteria;Bacteroidetes;Bacteroidia;Bacteroidales;Prevotellaceae;uncultured;	1	0	0	0	0	0	0	0	0	0	0	0	0	0	0	0	0	0	0	0	0	0	0	0	0	0	0	0	0	0	0	0	0	0	0	1	0	0	0	0	0
Bacteria;Cyanobacteria;Oxyphotobacteria;Oxyphotobacteria_unclassified;Oxyphotobacteria_unclassified;Oxyphotobacteria_unclassified;	1	0	0	0	0	0	0	0	0	0	0	0	0	0	0	0	0	0	0	0	0	0	0	0	0	0	0	1	0	0	0	0	0	0	0	0	0	0	0	0	0
Bacteria;Firmicutes;Bacilli;Lactobacillales;Carnobacteriaceae;Carnobacteriaceae_unclassified;	1	0	0	0	0	0	0	0	0	0	0	0	0	0	0	0	0	0	0	0	0	0	0	0	0	0	0	0	0	0	0	0	0	0	0	0	0	0	0	0	1
Bacteria;Planctomycetes;Planctomycetes_unclassified;Planctomycetes_unclassified;Planctomycetes_unclassified;Planctomycetes_unclassified;	1	0	1	0	0	0	0	0	0	0	0	0	0	0	0	0	0	0	0	0	0	0	0	0	0	0	0	0	0	0	0	0	0	0	0	0	0	0	0	0	0
Bacteria;Proteobacteria;Alphaproteobacteria;Rhizobiales;Beijerinckiaceae;Beijerinckiaceae_unclassified;	1	0	0	0	0	0	0	0	0	0	0	0	0	0	0	0	0	0	0	0	0	0	0	0	0	0	0	0	0	0	0	1	0	0	0	0	0	0	0	0	0
Bacteria;Proteobacteria;Alphaproteobacteria;Rhizobiales;Rhizobiales_Incertae_Sedis;uncultured;	1	0	0	0	0	0	0	0	0	0	0	0	0	0	0	0	0	1	0	0	0	0	0	0	0	0	0	0	0	0	0	0	0	0	0	0	0	0	0	0	0
Bacteria;Proteobacteria;Alphaproteobacteria;Rhizobiales;Rhizobiales_unclassified;Rhizobiales_unclassified;	1	0	0	0	0	0	0	0	0	0	0	0	0	0	0	0	0	0	0	0	0	0	0	0	0	0	0	0	0	1	0	0	0	0	0	0	0	0	0	0	0
Bacteria;Proteobacteria;Alphaproteobacteria;Rhizobiales;Xanthobacteraceae;Xanthobacteraceae_unclassified;	1	0	0	0	1	0	0	0	0	0	0	0	0	0	0	0	0	0	0	0	0	0	0	0	0	0	0	0	0	0	0	0	0	0	0	0	0	0	0	0	0
Bacteria;Proteobacteria;Alphaproteobacteria;Rhizobiales;Xanthobacteraceae;uncultured;	1	0	0	0	0	0	0	0	1	0	0	0	0	0	0	0	0	0	0	0	0	0	0	0	0	0	0	0	0	0	0	0	0	0	0	0	0	0	0	0	0
Bacteria;Proteobacteria;Alphaproteobacteria;Sneathiellales;Sneathiellaceae;uncultured;	1	0	0	0	0	0	0	1	0	0	0	0	0	0	0	0	0	0	0	0	0	0	0	0	0	0	0	0	0	0	0	0	0	0	0	0	0	0	0	0	0
Bacteria;Proteobacteria;Deltaproteobacteria;Deltaproteobacteria_unclassified;Deltaproteobacteria_unclassified;Deltaproteobacteria_unclassified;	1	0	0	0	0	0	0	0	1	0	0	0	0	0	0	0	0	0	0	0	0	0	0	0	0	0	0	0	0	0	0	0	0	0	0	0	0	0	0	0	0
Bacteria;Proteobacteria;Deltaproteobacteria;Desulfarculales;Desulfarculaceae;uncultured;	1	0	0	0	1	0	0	0	0	0	0	0	0	0	0	0	0	0	0	0	0	0	0	0	0	0	0	0	0	0	0	0	0	0	0	0	0	0	0	0	0
Bacteria;Proteobacteria;Deltaproteobacteria;Myxococcales;Myxococcales_unclassified;Myxococcales_unclassified;	1	0	0	0	0	0	0	0	0	0	0	1	0	0	0	0	0	0	0	0	0	0	0	0	0	0	0	0	0	0	0	0	0	0	0	0	0	0	0	0	0
Bacteria;Proteobacteria;Gammaproteobacteria;Xanthomonadales;Xanthomonadales_unclassified;Xanthomonadales_unclassified;	1	0	0	0	0	0	0	0	0	0	0	0	0	0	0	0	0	0	0	0	0	0	0	0	0	0	1	0	0	0	0	0	0	0	0	0	0	0	0	0	0
unknown;unknown_unclassified;unknown_unclassified;unknown_unclassified;unknown_unclassified;unknown_unclassified;	1	0	0	0	0	0	0	0	0	0	0	0	0	0	0	0	0	0	0	0	0	0	0	0	0	0	0	0	0	0	0	0	0	0	0	0	0	0	0	1	0

## Sheet: otus99-mothur_mac
taxonomy	total	A003	A014	A018	A036	A042	A056	A063	A070	A080	A081	A093	A131	A139	A140	A147	A157	A160	A167	A169	A174	A181	A190	A215	A224	A235	A239	A243	A244	A258	A260	A262	C023	C035	C059	C072	C089	C114	C145	C146	C209
Root	2812474	116840	99732	115750	144982	44386	72489	82418	116055	19870	88765	89045	50891	31503	47285	61646	24811	43872	75979	81116	116078	92851	84755	95661	86335	22537	106664	102215	63064	72106	29782	126742	122337	22290	52913	50598	27243	30712	25612	37114	37430
Bacteria;Bacteroidetes;Bacteroidia;Bacteroidales;Bacteroidaceae;Bacteroides;	616501	4702	4858	25009	41540	13265	2471	1483	8086	4867	43485	14388	13807	81	6300	9894	7384	14586	11451	30683	12765	27989	26456	8925	10393	3510	22164	23603	20537	33663	9998	54841	27990	833	5605	4873	14212	10533	12577	9962	16732
Bacteria;Firmicutes;Clostridia;Clostridiales;Lachnospiraceae;Lachnospiraceae_unclassified;	200965	4339	4302	4566	7218	3260	17	4914	7635	2271	10131	7206	3635	3823	5061	6295	1244	3341	8143	13585	4080	3484	3653	8300	6275	819	4480	8287	3684	4127	1770	18756	8703	498	5257	6013	2922	2327	1473	2237	2834
Bacteria;Bacteroidetes;Bacteroidia;Bacteroidales;Rikenellaceae;Alistipes;	169754	10413	725	17910	19629	6152	1	171	9095	905	3	6897	4865	16	1239	2485	1944	523	822	3432	9197	6699	6000	7090	4253	1309	12490	5998	3210	1	1608	6170	4991	2217	2946	2270	576	412	564	1474	3052
Bacteria;Firmicutes;Clostridia;Clostridiales;Ruminococcaceae;Faecalibacterium;	153819	6416	2714	2658	4601	3246	1	371	5058	2498	11	2548	3573	1392	3766	3435	642	3724	5144	2715	5912	9237	10529	6922	3942	2855	194	9741	3266	10176	2012	13631	7051	393	1685	6225	1425	0	1615	2495	0
Bacteria;Bacteroidetes;Bacteroidia;Bacteroidales;Bacteroidales_unclassified;Bacteroidales_unclassified;	140246	5797	2634	9703	8789	1114	167	328	26484	165	20	5527	1590	24	1068	3573	628	1000	328	8	4313	11304	4473	6855	4079	1031	933	9982	1966	1917	305	5014	5725	1171	3953	1724	766	2210	466	2053	1059
Bacteria;Firmicutes;Clostridia;Clostridiales;Ruminococcaceae;Ruminococcaceae_unclassified;	99345	2807	1573	2279	2733	1084	25	13704	3084	997	231	11687	1533	163	1275	2991	548	602	1086	1517	5878	2802	1370	4386	9560	768	3255	3120	1204	650	949	1303	1709	4473	3644	812	384	1347	563	584	665
Bacteria;Bacteroidetes;Bacteroidia;Bacteroidales;Prevotellaceae;Prevotella_7;	76609	26120	28920	0	1	2	14	109	0	0	0	0	0	2	1633	1	0	1	0	1	7763	1	0	1873	3487	283	1	0	0	0	0	0	0	0	8	6389	0	0	0	0	0
Bacteria;Firmicutes;Clostridia;Clostridiales;Ruminococcaceae;Subdoligranulum;	68006	1934	724	4858	4	1259	0	3170	2093	36	1	3720	756	922	926	2088	887	900	2197	596	4300	2585	3068	732	2879	1185	3711	2627	1328	2958	304	2433	5245	1	2452	1155	501	489	711	594	1677
Bacteria;Firmicutes;Clostridia;Clostridiales;Ruminococcaceae;CAG-352;	63128	514	359	2722	4749	568	14	10331	639	235	961	2780	265	337	0	960	620	668	521	1890	2066	1199	396	3588	1744	443	13012	461	1833	4994	1357	0	852	207	502	230	0	420	155	530	6
Bacteria;Firmicutes;Clostridia;Clostridiales;Lachnospiraceae;uncultured;	58491	1706	303	936	1422	569	10	411	2641	1389	1701	1291	1732	1654	2259	1748	17	212	2669	4528	983	373	2278	2324	1024	62	3264	6223	4303	167	519	703	2784	135	1012	1255	1857	324	668	282	753
Bacteria;Firmicutes;Clostridia;Clostridiales;Ruminococcaceae;Ruminococcaceae_ge;	55298	919	2068	2411	1221	574	17	20511	982	2	1332	37	237	1345	235	441	159	155	9097	939	4087	1191	2	378	794	117	1130	153	162	108	130	503	216	600	1485	327	76	387	24	701	45
Bacteria;Firmicutes;Clostridia;Clostridiales;Ruminococcaceae;Ruminococcus_1;	53312	188	1646	10823	2000	814	1	29	391	1	3389	801	360	1	355	2333	3210	933	2247	1482	2692	802	452	411	2087	114	635	2541	446	2	210	2	6183	211	1254	450	4	482	20	3213	97
Bacteria;Firmicutes;Clostridia;Clostridiales;Lachnospiraceae;Blautia;	50399	1835	418	2347	2614	200	46	3821	440	296	1093	1240	475	4476	553	351	614	728	1333	414	2080	1840	1623	1209	1104	230	3460	1025	807	3701	493	3010	959	275	1055	778	637	1039	437	263	1080
Bacteria;Proteobacteria;Alphaproteobacteria;Alphaproteobacteria_unclassified;Alphaproteobacteria_unclassified;Alphaproteobacteria_unclassified;	50369	5914	720	407	0	0	0	8	3509	1636	0	285	658	10	829	3697	1	0	4	2090	1	0	160	7979	98	10	173	3465	1945	0	1226	0	12597	29	0	37	0	153	0	2	2726
Bacteria;Bacteria_unclassified;Bacteria_unclassified;Bacteria_unclassified;Bacteria_unclassified;Bacteria_unclassified;	48770	2800	3400	95	944	147	25444	4	456	107	156	76	363	0	737	857	13	2	25	4	3881	483	30	1578	75	10	229	1403	89	8	30	1	1825	47	1045	2236	20	17	4	39	90
Bacteria;Verrucomicrobia;Verrucomicrobiae;Verrucomicrobiales;Verrucomicrobiaceae;uncultured;	47929	671	14	107	6384	8	15779	0	1955	4	2	737	230	133	37	558	0	162	2381	174	569	2	2	29	1445	61	5783	6	822	42	32	3	4197	6	1825	6	1	3270	1	6	485
Bacteria;Bacteroidetes;Bacteroidia;Bacteroidales;Prevotellaceae;Prevotellaceae_unclassified;	43210	2488	1240	3	4	3	44	1844	8250	5	29	3	5	8	8043	733	0	2	1	2	9766	3	6	2422	560	233	3	1344	0	2	1	0	6	0	5056	1099	0	2	0	0	0
Bacteria;Firmicutes;Clostridia;Clostridiales;Ruminococcaceae;Ruminococcaceae_UCG-002;	42953	2224	717	2228	1521	1062	0	1010	3152	1	0	932	636	3	944	370	140	65	423	634	3550	2122	155	1991	5223	705	3361	354	1759	19	1405	707	1128	287	1373	1970	27	507	61	187	0
Bacteria;Firmicutes;Clostridia;Clostridiales;Lachnospiraceae;Agathobacter;	42630	2806	665	2	1	1477	0	320	413	294	1	755	2558	1714	229	561	1	4830	5562	1	891	4464	372	290	258	78	3613	927	2879	2	67	1	869	173	866	1270	61	1047	1198	1114	0
Bacteria;Bacteroidetes;Bacteroidia;Bacteroidales;Tannerellaceae;Parabacteroides;	38188	1341	92	1682	48	668	1172	52	145	581	0	1423	816	9	307	828	554	898	224	1497	809	1916	5286	1567	231	49	2870	1190	432	2296	746	3070	1922	84	227	197	0	420	285	1054	1200
Bacteria;Firmicutes;Clostridia;Clostridiales;Lachnospiraceae;Roseburia;	37727	740	678	355	285	195	0	257	997	73	4725	1144	348	73	305	585	163	4371	1043	1115	371	855	663	461	570	302	1169	2344	3299	1	1368	2186	1621	142	423	1018	849	348	1686	501	98
Bacteria;Firmicutes;Clostridia;Clostridiales;Christensenellaceae;Christensenellaceae_R-7_group;	35168	770	462	2184	178	865	3	44	1143	40	0	680	2210	0	830	1800	34	6	3763	739	892	1261	3	546	5936	345	196	4514	377	0	9	77	4099	217	763	113	0	0	17	17	35
Bacteria;Firmicutes;Clostridia;Clostridiales;Ruminococcaceae;Ruminococcaceae_UCG-014;	34275	2737	2004	4069	75	14	2	980	2506	72	1	3400	286	3	475	1690	2	29	163	1	2311	41	1468	2434	3971	957	1815	1041	709	6	169	1	2	33	796	0	0	10	0	0	2
Bacteria;Firmicutes;Negativicutes;Selenomonadales;Acidaminococcaceae;Phascolarctobacterium;	33955	765	1909	1967	0	81	2818	82	0	462	1	8166	2079	0	0	73	12	3	1969	4999	496	25	0	260	1286	0	2	1	141	0	297	0	2317	258	1338	67	328	0	721	11	1021
Bacteria;Proteobacteria;Gammaproteobacteria;Betaproteobacteriales;Burkholderiaceae;Burkholderiaceae_unclassified;	31220	4558	1728	89	247	14	1	80	3120	479	0	0	1135	171	1084	23	0	1	166	67	864	2678	4111	2922	125	123	724	0	0	1	566	0	4798	64	186	0	0	891	11	193	0
Bacteria;Bacteroidetes;Bacteroidia;Bacteroidales;Tannerellaceae;Tannerellaceae_unclassified;	29755	4	3412	2136	8226	447	0	100	3002	1	0	0	758	19	95	325	310	1	333	0	1621	6	23	376	272	258	1558	0	1053	0	146	1	3151	155	420	192	1	903	0	450	0
Bacteria;Proteobacteria;Gammaproteobacteria;Betaproteobacteriales;Burkholderiaceae;Parasutterella;	27607	0	1	25	10999	590	3	0	0	0	0	2009	24	1	2	653	582	1705	477	0	75	0	661	5	11	1	0	631	608	962	0	4797	0	25	295	915	450	0	0	151	949
Bacteria;Firmicutes;Clostridia;Clostridiales;Lachnospiraceae;Fusicatenibacter;	24119	343	97	319	2167	313	1	155	237	74	1086	363	284	627	122	543	0	540	1835	4235	428	1379	2543	383	309	417	225	55	200	1	176	984	610	534	245	659	616	0	107	192	715
Bacteria;Firmicutes;Clostridia;Clostridiales;Ruminococcaceae;Ruminiclostridium_6;	23702	5374	694	113	1086	257	11	11	2427	0	190	785	759	1	263	0	0	465	53	0	157	0	0	5844	104	239	0	0	263	0	665	16	2593	529	66	16	0	2	2	4	713
Bacteria;Actinobacteria;Actinobacteria;Bifidobacteriales;Bifidobacteriaceae;Bifidobacterium;	22149	60	107	1121	437	581	11	1924	34	0	2441	1471	14	992	21	394	767	135	3762	0	1201	1798	110	12	848	0	1398	123	76	2	4	272	77	1778	104	0	0	1	0	38	35
Bacteria;Firmicutes;Erysipelotrichia;Erysipelotrichales;Erysipelotrichaceae;Erysipelotrichaceae_unclassified;	21360	133	95	771	160	26	0	6500	29	12	0	1304	407	3430	423	16	5	109	1332	887	26	279	423	192	353	58	1156	155	89	355	56	1295	336	52	148	170	522	9	8	39	0
Bacteria;Proteobacteria;Gammaproteobacteria;Enterobacteriales;Enterobacteriaceae;Escherichia-Shigella;	20837	1	1	152	115	15	1650	82	25	672	148	1378	1105	28	8	19	2	9	14	2	6321	224	0	24	169	34	17	200	1563	3627	1060	0	10	5	1	0	3	11	16	2121	5
Bacteria;Firmicutes;Clostridia;Clostridiales;Lachnospiraceae;Lachnoclostridium;	17577	791	194	247	236	208	0	1979	248	139	847	107	106	3662	533	208	78	27	397	136	1370	816	91	102	459	89	416	81	163	804	127	501	320	330	259	193	84	79	22	837	291
Bacteria;Firmicutes;Negativicutes;Selenomonadales;Veillonellaceae;Veillonella;	15919	27	3	8	8	367	2	41	74	50	12792	21	11	25	342	56	0	291	13	28	1	36	38	12	28	1	16	65	8	51	2	525	44	253	3	3	0	24	0	594	56
Bacteria;Firmicutes;Clostridia;Clostridiales;Ruminococcaceae;Ruminococcaceae_UCG-005;	15466	1207	747	316	170	707	12	96	1177	6	1	346	350	12	294	720	6	15	45	285	1440	155	38	1644	1436	289	27	572	271	31	452	152	522	159	1177	394	2	14	11	128	40
Bacteria;Firmicutes;Bacilli;Lactobacillales;Streptococcaceae;Streptococcus;	15212	69	91	72	26	22	8723	133	46	19	574	13	31	56	1856	587	10	312	466	77	23	196	35	9	61	9	40	572	5	23	50	29	31	229	4	23	11	42	2	572	63
Bacteria;Firmicutes;Negativicutes;Selenomonadales;Veillonellaceae;Dialister;	15067	1104	0	0	4757	104	73	0	253	0	179	0	0	0	410	0	3	0	0	0	2	492	117	261	3	715	5034	128	246	45	2	1022	1	2	0	0	0	109	4	1	0
Bacteria;Firmicutes;Clostridia;Clostridiales;Lachnospiraceae;Lachnospiraceae_ge;	13818	180	297	527	718	57	0	1023	45	27	79	327	169	761	486	150	324	2	939	2	406	196	515	97	309	442	361	167	401	1	40	116	267	122	740	3109	32	139	44	29	172
Bacteria;Bacteroidetes;Bacteroidia;Bacteroidales;Prevotellaceae;Prevotellaceae_UCG-003;	13798	1533	424	0	1	224	0	40	3291	0	0	1	0	1	575	1078	299	1	1843	2	618	0	2186	1094	278	309	0	0	0	0	0	0	0	0	0	0	0	0	0	0	0
Bacteria;Actinobacteria;Coriobacteriia;Coriobacteriales;Coriobacteriaceae;Collinsella;	13147	909	188	110	29	120	0	1471	75	3	0	87	0	1485	219	82	103	451	574	1	1397	531	242	87	2753	48	1102	139	133	0	11	49	229	205	172	15	0	8	57	62	0
Bacteria;Bacteroidetes;Bacteroidia;Bacteroidales;Marinifilaceae;Odoribacter;	12875	736	149	1237	2	175	0	66	953	0	0	1281	628	0	191	265	142	0	89	365	1095	739	647	269	315	154	262	1114	473	1	109	0	296	7	40	187	270	240	0	246	132
Bacteria;Proteobacteria;Gammaproteobacteria;Enterobacteriales;Enterobacteriaceae;Enterobacteriaceae_unclassified;	12799	95	200	1	168	1	8246	0	20	5	202	4	10	0	275	6	0	9	0	0	18	1	1	297	321	1	11	105	3	12	535	1	494	0	1	0	0	0	0	1756	0
Bacteria;Firmicutes;Clostridia;Clostridiales;Ruminococcaceae;Ruminococcaceae_UCG-010;	11105	662	1574	880	25	28	0	8	1750	0	0	218	174	0	151	88	12	27	1	56	1219	0	0	466	363	91	0	2676	3	0	23	0	377	54	91	13	0	0	0	75	0
Bacteria;Firmicutes;Clostridia;Clostridiales;Ruminococcaceae;Oscillospira;	10627	275	390	96	160	14	0	4	803	108	1	512	189	7	649	101	11	397	178	28	92	271	1162	1072	67	111	7	809	386	0	57	673	564	239	553	179	84	144	103	77	54
Bacteria;Bacteroidetes;Bacteroidia;Bacteroidales;Muribaculaceae;Muribaculaceae_ge;	10284	9	101	423	19	3	0	1	12	657	2	5	9	9	8	2015	1878	1	128	4	9	243	7	118	207	4	1689	18	1	87	5	12	17	7	310	2	6	1055	1012	189	2
Bacteria;Bacteroidetes;Bacteroidia;Bacteroidales;Rikenellaceae;Rikenellaceae_RC9_gut_group;	9859	0	7207	1	0	1	0	1	2524	0	0	0	0	0	0	0	0	0	0	0	0	0	0	4	7	114	0	0	0	0	0	0	0	0	0	0	0	0	0	0	0
Bacteria;Firmicutes;Clostridia;Clostridiales;Clostridiales_unclassified;Clostridiales_unclassified;	9839	1219	572	474	122	339	46	53	465	12	9	144	102	5	23	522	19	12	76	30	301	159	5	1746	445	44	93	735	29	2	11	10	874	786	145	82	4	3	19	53	49
Bacteria;Firmicutes;Clostridia;Clostridiales;Ruminococcaceae;Flavonifractor;	9320	289	73	315	595	75	1	125	129	63	1555	130	78	73	127	212	38	243	121	102	370	402	227	148	239	94	604	161	147	183	21	614	153	640	336	81	49	131	265	59	52
Bacteria;Firmicutes;Negativicutes;Selenomonadales;Acidaminococcaceae;Acidaminococcaceae_unclassified;	9222	0	1	0	0	317	0	101	0	0	0	0	0	108	2	2627	873	379	0	0	0	0	1845	0	0	0	0	0	0	0	0	0	0	250	0	1473	0	0	86	1160	0
Bacteria;Firmicutes;Clostridia;Clostridiales;Lachnospiraceae;Butyrivibrio;	8829	0	5691	0	0	0	0	0	0	0	0	0	0	0	0	0	0	0	0	0	0	0	0	0	249	2889	0	0	0	0	0	0	0	0	0	0	0	0	0	0	0
Bacteria;Firmicutes;Clostridia;Clostridiales;Lachnospiraceae;Coprococcus_2;	8614	1100	579	1526	307	2	0	0	303	0	2	549	499	0	104	166	0	204	0	0	293	0	0	214	551	28	709	0	1	0	0	0	871	0	520	0	0	0	86	0	0
Bacteria;Proteobacteria;Deltaproteobacteria;Desulfovibrionales;Desulfovibrionaceae;Desulfovibrio;	8289	123	290	464	923	160	34	236	38	0	0	158	7	0	138	352	0	0	184	0	427	94	0	612	115	0	278	163	569	0	8	1	23	2448	36	370	0	0	0	21	17
Bacteria;Proteobacteria;Deltaproteobacteria;Desulfovibrionales;Desulfovibrionaceae;Bilophila;	8001	323	46	78	2526	28	120	6	377	40	0	0	54	9	120	258	110	112	23	335	237	67	483	134	49	3	246	125	224	222	209	0	195	39	401	219	183	148	129	70	53
Bacteria;Bacteroidetes;Bacteroidia;Bacteroidales;Prevotellaceae;Alloprevotella;	7727	1	5647	0	2	0	1	5	2	0	2	1	0	0	0	1	0	0	1	0	2	3	0	2028	2	0	4	1	0	1	2	2	8	4	0	1	1	0	0	4	1
Bacteria;Firmicutes;Clostridia;Clostridiales;Christensenellaceae;Christensenellaceae_unclassified;	6675	208	52	1150	2	692	0	12	673	0	0	64	51	0	67	189	0	0	3	1	1934	50	0	234	756	224	34	89	1	0	3	0	2	5	146	5	0	0	8	13	7
Bacteria;Actinobacteria;Coriobacteriia;Coriobacteriales;Eggerthellaceae;Eggerthella;	6562	373	65	277	112	24	0	896	37	24	63	174	30	1575	133	64	47	33	62	90	219	49	108	188	851	45	121	42	70	86	7	170	29	153	177	82	14	40	7	14	11
Bacteria;Tenericutes;Mollicutes;Mollicutes_unclassified;Mollicutes_unclassified;Mollicutes_unclassified;	6123	8	2786	87	261	0	0	1	2414	0	0	1	0	0	16	3	1	2	0	0	0	1	0	534	2	0	0	1	0	1	0	1	1	0	0	0	0	1	0	0	1
Bacteria;Firmicutes;Clostridia;Clostridiales;Lachnospiraceae;Tyzzerella;	5524	139	29	80	13	10	0	11	44	12	0	334	19	14	176	228	2	108	236	786	70	82	342	472	39	101	280	352	175	95	104	17	280	40	108	168	121	339	3	12	83
Bacteria;Firmicutes;Firmicutes_unclassified;Firmicutes_unclassified;Firmicutes_unclassified;Firmicutes_unclassified;	5220	1469	73	856	170	442	4	16	654	6	0	22	16	3	8	126	10	22	7	5	551	12	25	57	29	3	16	161	4	5	3	0	60	111	66	173	1	2	15	10	7
Bacteria;Firmicutes;Clostridia;Clostridiales;Ruminococcaceae;Butyricicoccus;	5041	73	22	220	239	85	0	152	24	33	55	201	70	552	195	64	39	84	578	233	239	59	36	30	36	42	64	105	102	100	50	583	66	21	126	99	34	69	146	93	22
Bacteria;Firmicutes;Clostridia;Clostridiales;Ruminococcaceae;Ruminococcaceae_NK4A214_group;	4847	57	90	105	1152	69	14	87	40	5	0	222	11	0	30	7	9	0	18	0	143	92	0	104	125	13	629	97	114	0	35	0	154	137	342	875	0	0	8	15	48
Bacteria;Firmicutes;Clostridia;Clostridiales;Peptostreptococcaceae;Peptostreptococcaceae_unclassified;	4593	248	431	19	97	30	7	111	140	9	105	3	85	2	19	55	8	63	27	61	114	186	0	6	820	6	154	114	52	0	3	1330	208	43	4	2	17	1	4	9	0
Bacteria;Proteobacteria;Gammaproteobacteria;Enterobacteriales;Enterobacteriaceae;Klebsiella;	4119	39	0	0	0	0	3873	1	1	0	2	1	0	0	1	1	0	5	0	0	0	0	0	191	0	0	0	0	0	0	0	0	4	0	0	0	0	0	0	0	0
Bacteria;Cyanobacteria;Oxyphotobacteria;Chloroplast;Chloroplast_fa;Chloroplast_ge;	3528	2	9	2	1610	0	5	0	5	7	4	1	0	6	8	23	1	90	557	6	32	0	10	39	2	0	2	746	1	2	4	1	1	67	210	43	4	23	1	3	1
Bacteria;Firmicutes;Erysipelotrichia;Erysipelotrichales;Erysipelotrichaceae;Faecalitalea;	3205	750	218	29	37	1	5	1158	0	11	12	6	54	4	55	15	2	11	3	36	116	61	4	1	294	0	18	101	25	14	1	21	16	2	20	23	3	64	8	4	2
Bacteria;Firmicutes;Negativicutes;Selenomonadales;Veillonellaceae;Veillonellaceae_unclassified;	2986	0	15	1	6	1	23	20	3	0	2	0	0	734	0	201	0	0	0	0	1943	3	0	4	2	0	1	0	0	4	0	0	22	0	0	0	0	0	0	1	0
Bacteria;Firmicutes;Clostridia;Clostridiales;Family_XIII;Family_XIII_ge;	2273	17	0	30	44	27	692	40	0	7	0	37	7	0	1	17	53	14	7	9	6	18	22	1	6	0	1037	2	1	5	5	0	4	116	19	4	0	3	8	1	13
Bacteria;Firmicutes;Clostridia;Clostridiales;Clostridiaceae_1;Clostridiaceae_1_unclassified;	2234	299	396	26	4	14	6	31	22	101	10	0	59	0	1	5	0	3	0	2	59	67	16	2	338	5	14	16	31	0	14	634	0	17	4	1	27	0	2	8	0
Bacteria;Firmicutes;Clostridia;Clostridiales;Lachnospiraceae;Dorea;	2182	38	10	28	55	32	0	426	22	30	12	46	10	387	59	32	0	0	75	104	76	33	18	23	144	6	0	28	93	69	28	80	31	5	30	40	20	53	13	0	26
Bacteria;Firmicutes;Clostridia;Clostridiales;Lachnospiraceae;Coprococcus_1;	1979	85	34	254	0	38	0	207	37	0	0	106	23	111	20	22	0	0	120	0	67	113	24	41	162	3	71	14	25	96	27	39	114	0	39	64	0	18	0	5	0
Bacteria;Proteobacteria;Gammaproteobacteria;Pasteurellales;Pasteurellaceae;Pasteurellaceae_unclassified;	1666	72	1	0	0	0	0	0	268	8	471	22	36	1	66	138	0	59	12	0	4	160	2	4	3	0	1	15	8	55	3	67	158	3	1	0	1	0	1	21	5
Bacteria;Bacteroidetes;Bacteroidia;Bacteroidia_unclassified;Bacteroidia_unclassified;Bacteroidia_unclassified;	1538	2	8	45	24	174	0	0	406	2	0	9	3	0	0	131	0	0	1	0	1	140	2	157	0	0	19	2	5	0	1	39	122	3	99	47	2	1	0	90	3
Bacteria;Firmicutes;Clostridia;Clostridia_unclassified;Clostridia_unclassified;Clostridia_unclassified;	1452	351	43	204	110	83	0	0	72	0	0	45	19	0	9	49	0	0	0	0	187	0	0	29	36	0	0	49	31	0	0	0	2	27	67	0	0	0	0	16	23
Bacteria;Cyanobacteria;Melainabacteria;Melainabacteria_unclassified;Melainabacteria_unclassified;Melainabacteria_unclassified;	1440	1	762	0	0	0	0	0	0	0	0	1	2	0	0	0	0	0	0	0	0	0	1	495	0	0	3	1	0	0	1	0	173	0	0	0	0	0	0	0	0
Bacteria;Actinobacteria;Coriobacteriia;Coriobacteriales;Coriobacteriales_unclassified;Coriobacteriales_unclassified;	1435	9	5	125	0	45	0	64	20	1	0	42	12	0	38	92	20	0	258	7	100	0	0	20	87	8	1	181	20	0	0	0	118	88	50	14	0	10	0	0	0
Bacteria;Firmicutes;Clostridia;Clostridiales;Christensenellaceae;uncultured;	1378	13	13	1006	19	31	0	25	8	1	0	34	3	0	2	21	11	11	3	5	13	19	5	4	39	2	9	8	1	0	1	0	22	14	14	7	0	1	4	7	2
Bacteria;Firmicutes;Clostridia;Clostridiales;Lachnospiraceae;Tyzzerella_3;	1377	0	0	0	131	0	0	11	0	0	0	0	0	374	0	15	0	0	155	0	0	0	97	0	0	0	47	0	38	253	89	0	76	0	91	0	0	0	0	0	0
Bacteria;Firmicutes;Clostridia;Clostridiales;Family_XIII;Family_XIII_unclassified;	1303	77	45	82	63	22	0	118	69	1	0	28	19	0	12	25	25	13	29	20	65	61	26	89	89	15	30	33	11	2	2	16	27	29	66	38	2	3	9	20	22
Bacteria;Firmicutes;Bacilli;Lactobacillales;Lactobacillaceae;Lactobacillus;	1292	0	6	26	15	565	67	6	14	0	4	8	7	2	9	15	11	25	5	0	63	5	2	40	9	4	26	312	8	4	5	11	6	3	0	3	2	2	0	2	0
Bacteria;Firmicutes;Clostridia;Clostridiales;Clostridiaceae_1;Clostridium_sensu_stricto_1;	1104	16	313	0	0	6	69	38	18	15	0	0	40	0	1	15	0	11	1	2	19	14	5	4	58	1	2	264	10	0	0	1	0	131	4	0	1	0	0	45	0
Bacteria;Firmicutes;Erysipelotrichia;Erysipelotrichales;Erysipelotrichaceae;Erysipelatoclostridium;	959	0	0	95	47	1	3	38	0	19	46	193	21	4	0	46	35	42	31	14	0	25	9	1	0	4	8	36	29	25	5	30	21	18	18	8	21	38	2	2	24
Bacteria;Firmicutes;Negativicutes;Selenomonadales;Veillonellaceae;Megasphaera;	911	0	0	0	0	119	476	48	3	0	112	0	0	2	4	0	0	4	2	0	0	1	0	3	2	0	0	0	0	0	0	1	1	0	0	0	0	0	133	0	0
Bacteria;Firmicutes;Erysipelotrichia;Erysipelotrichales;Erysipelotrichaceae;Turicibacter;	805	23	139	0	0	1	0	1	2	77	0	392	21	0	1	1	3	0	0	0	62	3	1	0	39	0	5	12	5	0	2	13	0	0	0	0	0	0	0	2	0
Bacteria;Firmicutes;Clostridia;Clostridiales;Family_XIII;Anaerovorax;	753	0	124	0	0	0	0	368	45	0	0	0	0	0	3	0	0	0	0	0	0	0	0	5	147	0	1	37	0	0	0	0	0	0	1	16	0	0	0	6	0
Bacteria;Proteobacteria;Deltaproteobacteria;Desulfovibrionales;Desulfovibrionaceae;Desulfovibrionaceae_unclassified;	563	0	2	80	13	1	20	0	0	0	0	0	78	0	31	51	0	0	2	0	0	7	0	38	0	0	0	3	0	0	0	0	23	5	17	3	0	69	0	117	3
Bacteria;Verrucomicrobia;Verrucomicrobiae;Verrucomicrobiae_unclassified;Verrucomicrobiae_unclassified;Verrucomicrobiae_unclassified;	533	2	0	1	27	1	15	0	4	0	0	1	2	1	0	4	0	1	10	1	2	0	0	0	9	0	6	0	1	0	0	1	80	0	230	0	2	117	0	1	14
Bacteria;Firmicutes;Clostridia;Clostridiales;Peptostreptococcaceae;Terrisporobacter;	528	20	60	0	0	6	0	26	56	14	0	0	24	0	1	0	0	4	12	0	3	20	0	2	64	0	0	2	6	0	0	162	39	1	0	2	0	0	0	4	0
Bacteria;Verrucomicrobia;Verrucomicrobiae;Opitutales;Puniceicoccaceae;Puniceicoccaceae_ge;	468	175	159	2	0	0	0	0	0	0	0	0	0	0	0	54	0	0	0	0	0	0	0	6	1	0	0	66	0	0	0	0	0	2	3	0	0	0	0	0	0
Bacteria;Proteobacteria;Gammaproteobacteria;Betaproteobacteriales;Betaproteobacteriales_unclassified;Betaproteobacteriales_unclassified;	462	29	2	2	1	0	0	0	24	2	0	0	7	0	5	0	0	0	0	0	4	7	3	0	0	0	35	1	0	0	13	0	248	0	0	0	0	79	0	0	0
Bacteria;Firmicutes;Clostridia;Clostridiales;Family_XIII;Family_XIII_AD3011_group;	362	7	2	27	2	6	0	74	5	0	0	28	5	3	5	3	2	10	9	6	18	16	0	3	32	5	6	1	7	4	1	0	4	19	12	23	0	8	3	3	3
Bacteria;Firmicutes;Erysipelotrichia;Erysipelotrichales;Erysipelotrichaceae;Catenibacterium;	346	0	0	0	0	0	0	0	133	0	0	0	0	0	0	0	0	0	0	0	196	0	0	0	17	0	0	0	0	0	0	0	0	0	0	0	0	0	0	0	0
Bacteria;Proteobacteria;Gammaproteobacteria;Enterobacteriales;Enterobacteriaceae;Raoultella;	315	0	0	0	0	0	0	0	0	0	0	0	0	0	267	0	0	0	0	0	0	0	0	0	45	0	1	0	0	0	0	0	1	0	0	0	0	0	0	1	0
Bacteria;Synergistetes;Synergistia;Synergistales;Synergistaceae;Synergistaceae_unclassified;	315	5	0	0	187	0	0	6	0	1	0	0	0	0	1	3	0	0	1	0	0	0	0	25	61	0	0	0	0	0	0	0	0	0	23	0	0	0	0	2	0
Bacteria;Firmicutes;Bacilli;Lactobacillales;Enterococcaceae;Enterococcus;	303	1	0	0	22	0	115	0	0	0	4	0	10	0	23	0	50	1	0	0	0	12	9	0	0	1	2	15	38	0	0	0	0	0	0	0	0	0	0	0	0
Bacteria;Proteobacteria;Alphaproteobacteria;Rickettsiales;Mitochondria;Mitochondria_ge;	285	2	4	2	147	0	0	0	2	0	0	0	0	0	1	1	1	4	45	0	3	0	2	2	3	0	0	50	0	0	0	0	0	1	4	8	0	2	1	0	0
Bacteria;Proteobacteria;Gammaproteobacteria;Pasteurellales;Pasteurellaceae;Haemophilus;	267	0	0	0	0	0	0	0	63	4	14	1	0	0	6	3	0	0	0	0	0	0	0	0	0	0	0	0	0	0	0	0	168	1	1	0	0	0	0	5	1
Bacteria;Verrucomicrobia;Verrucomicrobiae;Verrucomicrobiales;Verrucomicrobiales_unclassified;Verrucomicrobiales_unclassified;	251	1	0	1	23	1	15	0	4	0	0	2	0	0	0	3	0	1	4	1	0	0	0	0	10	0	27	0	5	0	0	0	41	0	67	0	0	38	1	0	6
Bacteria;Cyanobacteria;Melainabacteria;Gastranaerophilales;Gastranaerophilales_fa;Gastranaerophilales_ge;	222	0	1	0	0	0	0	0	0	0	0	0	197	0	0	0	0	0	18	0	0	0	0	0	0	0	0	0	0	0	1	0	5	0	0	0	0	0	0	0	0
Bacteria;Proteobacteria;Gammaproteobacteria;Enterobacteriales;Enterobacteriaceae;Proteus;	203	0	0	0	0	0	5	0	0	0	196	0	0	0	0	0	0	0	0	0	0	1	0	0	0	0	0	0	0	0	0	0	0	1	0	0	0	0	0	0	0
Bacteria;Fusobacteria;Fusobacteriia;Fusobacteriales;Fusobacteriaceae;Fusobacterium;	193	0	0	0	6	0	38	0	1	0	78	0	0	8	3	1	0	1	0	0	0	9	0	0	20	0	0	0	0	0	0	1	6	0	0	0	0	0	0	0	21
Bacteria;Firmicutes;Clostridia;Clostridiales;Peptostreptococcaceae;Paraclostridium;	174	1	0	0	0	7	3	0	0	161	0	0	1	0	0	0	0	0	0	0	0	0	0	0	1	0	0	0	0	0	0	0	0	0	0	0	0	0	0	0	0
Bacteria;Actinobacteria;Coriobacteriia;Coriobacteriales;Atopobiaceae;Atopobiaceae_unclassified;	168	0	0	0	1	0	0	37	1	0	2	0	0	0	2	3	88	1	0	0	10	0	0	1	6	0	0	8	0	0	0	2	1	0	1	0	0	3	0	1	0
Bacteria;Patescibacteria;Saccharimonadia;Saccharimonadales;Saccharimonadaceae;Saccharimonadaceae_ge;	155	1	1	2	20	1	0	24	25	0	0	8	7	13	0	2	0	2	2	2	2	5	0	8	5	0	0	0	6	3	0	0	8	0	3	2	0	2	0	0	1
Bacteria;Firmicutes;Erysipelotrichia;Erysipelotrichales;Erysipelotrichaceae;Erysipelothrix;	152	0	0	0	4	0	0	0	0	1	0	15	1	0	1	9	0	0	0	14	0	6	2	3	1	1	58	0	1	7	4	0	5	0	3	0	1	15	0	0	0
Bacteria;Epsilonbacteraeota;Campylobacteria;Campylobacterales;Campylobacteraceae;Campylobacter;	142	2	0	0	0	0	0	0	1	0	111	0	1	0	0	0	0	1	0	1	0	5	0	0	1	0	0	0	5	3	0	4	4	0	0	0	0	0	0	3	0
Bacteria;Firmicutes;Clostridia;Clostridiales;Ruminococcaceae;uncultured;	136	96	0	0	35	0	0	0	0	0	0	0	0	0	0	5	0	0	0	0	0	0	0	0	0	0	0	0	0	0	0	0	0	0	0	0	0	0	0	0	0
Bacteria;Firmicutes;Clostridia;Clostridiales;Lachnospiraceae;Howardella;	118	0	21	0	0	0	0	0	0	0	0	0	0	0	0	0	0	0	0	0	0	0	0	0	85	0	0	12	0	0	0	0	0	0	0	0	0	0	0	0	0
Bacteria;Firmicutes;Clostridia;Clostridiales;Peptococcaceae;Peptococcaceae_unclassified;	118	11	0	10	56	1	1	0	1	0	2	0	0	0	0	0	0	2	0	0	7	0	0	1	0	2	0	2	0	0	0	0	0	1	0	19	0	0	0	2	0
Bacteria;Proteobacteria;Gammaproteobacteria;Enterobacteriales;Enterobacteriaceae;Kluyvera;	113	0	0	0	0	0	0	0	0	0	0	0	0	0	2	0	0	0	0	0	0	0	0	0	0	0	0	0	0	0	3	0	0	0	0	0	0	0	0	108	0
Bacteria;Firmicutes;Clostridia;Clostridiales;Lachnospiraceae;Anaerostipes;	102	1	1	3	2	0	0	6	0	0	8	2	0	5	0	0	1	6	5	14	1	0	4	0	0	0	3	3	0	6	0	5	7	0	2	3	2	1	2	1	8
Bacteria;Actinobacteria;Actinobacteria;Actinomycetales;Actinomycetaceae;Actinomyces;	100	1	1	4	2	0	0	31	0	1	1	9	0	5	4	3	0	6	1	0	1	9	0	4	6	0	2	0	2	0	0	0	0	5	0	0	0	0	0	2	0
Bacteria;Proteobacteria;Gammaproteobacteria;Enterobacteriales;Enterobacteriaceae;Enterobacter;	92	0	0	0	0	0	0	0	0	0	1	0	0	0	0	0	0	2	0	0	0	0	0	26	0	0	1	0	0	0	0	0	62	0	0	0	0	0	0	0	0
Bacteria;Firmicutes;Bacilli;Lactobacillales;Streptococcaceae;Lactococcus;	81	0	0	1	0	0	22	14	0	0	1	0	5	0	0	3	0	0	0	0	9	1	4	3	0	0	1	9	0	0	0	0	7	0	0	0	0	1	0	0	0
Bacteria;Firmicutes;Bacilli;Lactobacillales;Lactobacillales_unclassified;Lactobacillales_unclassified;	80	1	1	4	1	0	1	3	1	0	7	0	0	2	9	7	0	13	3	0	2	5	0	0	3	0	1	2	0	0	0	7	1	0	1	0	2	0	1	0	2
Bacteria;Firmicutes;Clostridia;Clostridiales;Ruminococcaceae;Ruminococcaceae_UCG-008;	79	0	2	0	0	0	0	64	0	0	0	0	0	0	0	0	0	0	0	0	0	0	0	1	0	0	0	11	0	0	0	0	0	1	0	0	0	0	0	0	0
Bacteria;Firmicutes;Clostridia;Clostridiales;Lachnospiraceae;Lachnospiraceae_FCS020_group;	78	8	1	0	2	1	0	9	2	0	0	9	0	0	2	6	0	1	4	0	5	1	0	2	8	0	0	4	3	0	0	3	1	0	3	1	0	1	0	1	0
Bacteria;Firmicutes;Erysipelotrichia;Erysipelotrichales;Erysipelotrichaceae;Coprobacillus;	77	0	0	11	2	0	0	0	2	0	0	0	0	12	0	6	0	0	0	0	0	8	2	7	14	2	0	0	2	0	3	0	0	1	0	0	0	0	0	5	0
Bacteria;Actinobacteria;Actinobacteria;Micrococcales;Micrococcaceae;Rothia;	76	0	0	2	4	0	5	4	1	0	1	0	0	0	18	10	0	2	0	0	2	4	1	0	0	0	0	12	0	0	0	0	2	8	0	0	0	0	0	0	0
Bacteria;Patescibacteria;Saccharimonadia;Saccharimonadales;Saccharimonadales_fa;Saccharimonadales_ge;	62	4	2	5	1	0	0	4	2	0	0	2	0	1	0	1	0	0	2	0	8	2	0	3	0	0	2	0	3	0	0	1	15	0	1	1	0	1	0	1	0
Bacteria;Firmicutes;Clostridia;Clostridiales;Peptococcaceae;Peptococcus;	61	15	0	0	0	3	0	1	0	0	0	16	1	0	5	5	0	0	0	0	10	0	0	0	0	3	0	0	0	0	0	0	0	0	0	0	0	0	0	2	0
Bacteria;Firmicutes;Clostridia;Clostridiales;Lachnospiraceae;Epulopiscium;	57	0	10	0	0	0	0	0	0	0	0	0	0	0	0	0	0	0	0	0	20	0	0	0	23	0	0	0	4	0	0	0	0	0	0	0	0	0	0	0	0
Bacteria;Proteobacteria;Proteobacteria_unclassified;Proteobacteria_unclassified;Proteobacteria_unclassified;Proteobacteria_unclassified;	45	3	3	2	0	1	0	0	1	0	0	0	4	0	0	2	0	0	0	0	0	0	0	6	0	0	0	4	0	0	1	0	5	0	0	0	0	1	0	0	12
Bacteria;Firmicutes;Bacilli;Bacillales;Bacillales_unclassified;Bacillales_unclassified;	41	0	2	1	2	0	6	1	0	0	1	0	0	0	10	1	0	3	0	0	0	0	0	0	4	0	0	1	2	0	0	0	3	0	1	0	0	1	1	1	0
Bacteria;Bacteroidetes;Bacteroidia;Bacteroidales;Marinifilaceae;Marinifilaceae_unclassified;	39	1	0	0	0	1	0	0	3	0	0	1	0	0	1	2	0	0	1	0	6	0	2	0	0	0	0	7	0	0	0	0	1	0	1	4	1	3	0	3	1
Bacteria;Firmicutes;Negativicutes;Selenomonadales;Veillonellaceae;Selenomonas_3;	34	0	0	0	0	0	0	0	0	0	28	0	0	0	0	0	0	0	0	0	0	0	0	0	0	0	0	0	0	1	0	4	0	0	0	0	0	1	0	0	0
Bacteria;Bacteroidetes;Bacteroidia;Bacteroidales;Prevotellaceae;Prevotella_6;	33	0	0	0	0	0	0	0	0	0	0	0	0	0	0	0	0	0	0	0	0	0	0	0	31	0	0	0	0	0	0	0	0	1	0	1	0	0	0	0	0
Bacteria;Proteobacteria;Gammaproteobacteria;Gammaproteobacteria_unclassified;Gammaproteobacteria_unclassified;Gammaproteobacteria_unclassified;	33	0	0	0	0	0	1	0	2	0	0	0	0	0	0	26	0	0	0	0	0	0	0	0	0	0	0	0	0	0	1	0	2	0	0	0	0	0	0	1	0
Bacteria;Proteobacteria;Gammaproteobacteria;Pseudomonadales;Pseudomonadaceae;Pseudomonas;	33	0	0	0	0	0	0	0	3	0	0	0	1	0	0	7	0	0	2	0	0	15	0	4	0	0	0	0	0	0	0	0	1	0	0	0	0	0	0	0	0
Bacteria;Tenericutes;Mollicutes;Mollicutes_RF39;Mollicutes_RF39_fa;Mollicutes_RF39_ge;	30	0	6	5	0	0	0	0	0	3	0	0	0	0	0	0	0	0	16	0	0	0	0	0	0	0	0	0	0	0	0	0	0	0	0	0	0	0	0	0	0
Bacteria;Firmicutes;Bacilli;Lactobacillales;Leuconostocaceae;Leuconostoc;	25	0	0	1	0	0	0	1	0	0	0	0	0	0	14	0	1	0	1	0	0	1	2	0	1	0	0	2	0	0	0	0	0	0	0	0	0	0	1	0	0
Bacteria;Firmicutes;Clostridia;Clostridiales;Eubacteriaceae;Eubacteriaceae_unclassified;	25	0	0	0	0	3	0	0	0	0	0	0	0	0	0	0	0	13	0	7	0	0	0	0	0	0	0	0	2	0	0	0	0	0	0	0	0	0	0	0	0
Bacteria;Firmicutes;Clostridia;Clostridiales;Lachnospiraceae;Coprococcus_3;	22	1	0	0	0	0	0	2	0	0	0	0	0	0	0	0	0	0	0	0	1	1	0	1	0	0	0	0	0	0	3	0	1	0	7	2	0	0	0	3	0
Bacteria;Firmicutes;Clostridia;Clostridiales;Peptostreptococcaceae;Peptostreptococcus;	21	0	0	0	0	0	0	0	0	0	2	0	0	0	0	0	0	0	0	0	0	1	0	0	15	0	0	0	0	0	0	0	3	0	0	0	0	0	0	0	0
Bacteria;Actinobacteria;Actinobacteria;Corynebacteriales;Corynebacteriaceae;Corynebacterium_1;	20	0	0	0	0	0	0	0	0	0	2	0	0	1	0	0	0	0	0	0	0	1	0	0	0	0	0	15	0	0	0	0	0	0	0	1	0	0	0	0	0
Bacteria;Actinobacteria;Actinobacteria_unclassified;Actinobacteria_unclassified;Actinobacteria_unclassified;Actinobacteria_unclassified;	19	0	0	0	0	0	0	0	0	0	0	0	0	0	0	0	0	0	0	0	0	0	0	11	4	0	0	0	0	0	0	0	2	1	1	0	0	0	0	0	0
Bacteria;Bacteroidetes;Bacteroidia;Bacteroidales;Rikenellaceae;Rikenellaceae_unclassified;	18	0	3	1	1	0	0	0	0	0	0	5	0	0	0	0	0	0	0	0	0	0	0	0	1	0	1	0	0	0	0	2	0	1	2	0	0	0	0	1	0
Bacteria;Firmicutes;Bacilli;Lactobacillales;Leuconostocaceae;Weissella;	18	0	0	0	1	0	0	0	0	0	0	0	1	0	0	0	0	2	0	0	0	1	7	0	0	0	0	0	0	0	5	0	0	0	0	0	0	0	0	0	1
Bacteria;Proteobacteria;Gammaproteobacteria;Betaproteobacteriales;Burkholderiaceae;Comamonas;	18	0	0	0	0	0	0	0	18	0	0	0	0	0	0	0	0	0	0	0	0	0	0	0	0	0	0	0	0	0	0	0	0	0	0	0	0	0	0	0	0
Bacteria;Bacteroidetes;Bacteroidia;Flavobacteriales;Flavobacteriaceae;Flavobacterium;	17	2	0	1	0	0	1	7	1	0	0	0	0	0	0	0	0	0	0	0	0	0	0	0	1	0	0	0	0	1	1	2	0	0	0	0	0	0	0	0	0
Bacteria;Proteobacteria;Gammaproteobacteria;Enterobacteriales;Enterobacteriaceae;Morganella;	17	0	0	0	0	0	5	0	4	0	0	0	0	0	0	4	0	0	0	0	0	2	0	0	0	0	0	0	0	0	0	0	0	0	0	0	0	2	0	0	0
Bacteria;Firmicutes;Clostridia;Clostridiales;Ruminococcaceae;Ethanoligenens;	16	0	0	0	0	10	0	0	3	0	0	0	0	0	0	0	0	0	0	0	0	0	0	0	0	0	0	0	0	0	0	0	1	0	0	2	0	0	0	0	0
Bacteria;Firmicutes;Clostridia;Clostridiales;Syntrophomonadaceae;Syntrophomonas;	16	0	0	7	0	0	0	0	6	0	0	0	0	0	0	0	0	0	0	0	0	0	0	0	0	0	2	1	0	0	0	0	0	0	0	0	0	0	0	0	0
Bacteria;Patescibacteria;Saccharimonadia;Saccharimonadales;Saccharimonadales_unclassified;Saccharimonadales_unclassified;	16	0	0	1	1	2	0	2	0	0	1	1	1	0	0	0	0	0	1	0	2	0	1	0	0	0	0	0	1	0	0	0	0	0	0	1	0	0	0	1	0
Bacteria;Cyanobacteria;Cyanobacteria_unclassified;Cyanobacteria_unclassified;Cyanobacteria_unclassified;Cyanobacteria_unclassified;	15	1	0	0	0	0	0	0	0	0	0	1	0	0	3	0	0	0	0	0	0	0	0	1	0	0	0	2	0	0	0	0	6	0	1	0	0	0	0	0	0
Bacteria;Firmicutes;Clostridia;Clostridiales;Family_XI;Parvimonas;	14	0	0	0	0	0	0	0	0	0	1	0	0	1	0	3	0	0	1	0	0	4	0	0	3	0	0	1	0	0	0	0	0	0	0	0	0	0	0	0	0
Bacteria;Firmicutes;Erysipelotrichia;Erysipelotrichales;Erysipelotrichaceae;Solobacterium;	14	0	0	2	1	0	0	2	2	0	0	1	0	1	0	0	0	1	0	0	1	0	0	0	2	0	0	0	0	0	0	0	1	0	0	0	0	0	0	0	0
Bacteria;Firmicutes;Clostridia;Clostridiales;Clostridiaceae_1;Clostridium_sensu_stricto_13;	12	0	0	0	0	0	0	0	0	0	0	0	0	0	0	0	0	0	0	0	12	0	0	0	0	0	0	0	0	0	0	0	0	0	0	0	0	0	0	0	0
Bacteria;Firmicutes;Bacilli;Bacillales;Staphylococcaceae;Staphylococcus;	11	0	0	0	0	0	0	0	0	0	0	0	0	0	0	1	0	0	0	0	0	0	0	0	0	0	0	10	0	0	0	0	0	0	0	0	0	0	0	0	0
Bacteria;Firmicutes;Clostridia;Clostridiales;Lachnospiraceae;Oribacterium;	11	0	0	2	0	0	0	1	0	0	2	0	0	2	0	1	0	0	0	0	0	1	0	0	1	0	0	0	1	0	0	0	0	0	0	0	0	0	0	0	0
Bacteria;Firmicutes;Clostridia;Clostridiales;Lachnospiraceae;Stomatobaculum;	11	0	0	0	0	0	0	5	0	0	0	0	0	0	0	0	0	1	0	1	0	2	0	0	0	0	0	0	0	0	0	1	0	0	1	0	0	0	0	0	0
Bacteria;Proteobacteria;Gammaproteobacteria;Betaproteobacteriales;Neisseriaceae;Neisseria;	11	1	0	0	0	0	2	0	0	0	0	0	0	0	0	0	0	4	0	0	0	1	0	0	0	0	0	0	0	3	0	0	0	0	0	0	0	0	0	0	0
Bacteria;Proteobacteria;Gammaproteobacteria;Enterobacteriales;Enterobacteriaceae;Hafnia-Obesumbacterium;	10	0	0	0	3	0	0	0	0	0	0	0	0	0	0	0	0	0	0	0	0	0	0	0	0	0	0	0	0	0	0	0	7	0	0	0	0	0	0	0	0
Bacteria;Tenericutes;Mollicutes;Anaeroplasmatales;Anaeroplasmataceae;Anaeroplasma;	10	0	3	0	1	0	0	0	4	0	0	0	0	0	0	0	0	0	0	0	0	0	1	1	0	0	0	0	0	0	0	0	0	0	0	0	0	0	0	0	0
Bacteria;Verrucomicrobia;Verrucomicrobiae;Verrucomicrobiales;Rubritaleaceae;Luteolibacter;	9	1	0	0	0	0	0	0	2	1	0	0	0	0	0	0	0	0	0	0	0	0	0	0	0	0	0	0	0	3	2	0	0	0	0	0	0	0	0	0	0
Bacteria;Firmicutes;Bacilli;Lactobacillales;Carnobacteriaceae;Carnobacterium;	6	0	0	0	0	0	0	0	0	0	4	0	0	0	2	0	0	0	0	0	0	0	0	0	0	0	0	0	0	0	0	0	0	0	0	0	0	0	0	0	0
Bacteria;Planctomycetes;Planctomycetacia;Planctomycetacia_unclassified;Planctomycetacia_unclassified;Planctomycetacia_unclassified;	6	0	0	0	0	0	0	0	1	0	1	3	0	0	0	0	0	0	0	0	0	0	0	0	0	0	0	0	0	0	1	0	0	0	0	0	0	0	0	0	0
Bacteria;Proteobacteria;Alphaproteobacteria;Sphingomonadales;Sphingomonadaceae;Sphingomonadaceae_unclassified;	6	0	1	0	0	0	2	0	0	0	0	0	0	0	0	0	0	0	0	0	0	0	1	0	0	0	0	0	0	1	1	0	0	0	0	0	0	0	0	0	0
Bacteria;Proteobacteria;Gammaproteobacteria;Betaproteobacteriales;Burkholderiaceae;Rhodoferax;	6	0	1	0	0	0	1	0	0	0	1	0	0	0	0	0	0	0	0	0	0	0	1	1	0	0	0	0	0	0	0	1	0	0	0	0	0	0	0	0	0
Bacteria;Proteobacteria;Gammaproteobacteria;Enterobacteriales;Enterobacteriaceae;Citrobacter;	6	0	0	0	0	0	0	0	0	0	0	0	0	0	1	0	0	0	0	0	0	0	0	0	5	0	0	0	0	0	0	0	0	0	0	0	0	0	0	0	0
Bacteria;Proteobacteria;Gammaproteobacteria;Enterobacteriales;Enterobacteriaceae;Providencia;	6	0	0	0	0	2	0	0	0	0	0	0	3	0	0	0	0	0	0	0	0	0	0	0	0	0	0	0	0	0	0	1	0	0	0	0	0	0	0	0	0
Bacteria;Proteobacteria;Gammaproteobacteria;Pseudomonadales;Moraxellaceae;Acinetobacter;	6	0	0	0	0	0	0	0	2	0	0	0	0	0	0	0	0	0	0	0	0	0	0	0	0	0	0	4	0	0	0	0	0	0	0	0	0	0	0	0	0
Bacteria;Actinobacteria;Actinobacteria;Actinobacteria_unclassified;Actinobacteria_unclassified;Actinobacteria_unclassified;	5	0	1	0	0	0	0	0	0	0	1	2	0	0	0	0	0	0	0	0	1	0	0	0	0	0	0	0	0	0	0	0	0	0	0	0	0	0	0	0	0
Bacteria;Firmicutes;Clostridia;Clostridiales;Family_XI;Finegoldia;	5	0	0	0	0	0	0	0	0	0	0	0	0	2	0	0	0	0	0	0	0	0	0	0	3	0	0	0	0	0	0	0	0	0	0	0	0	0	0	0	0
Bacteria;Nitrospirae;Nitrospira;Nitrospirales;Nitrospiraceae;Nitrospira;	5	0	1	1	0	0	0	0	0	1	0	2	0	0	0	0	0	0	0	0	0	0	0	0	0	0	0	0	0	0	0	0	0	0	0	0	0	0	0	0	0
Bacteria;Proteobacteria;Gammaproteobacteria;Betaproteobacteriales;Neisseriaceae;Neisseriaceae_unclassified;	5	0	0	0	0	0	0	0	0	0	0	0	0	0	0	0	0	0	0	0	0	4	0	0	0	0	0	0	0	0	0	0	1	0	0	0	0	0	0	0	0
Bacteria;Proteobacteria;Gammaproteobacteria;Betaproteobacteriales;Nitrosomonadaceae;Ellin6067;	5	0	0	0	1	0	1	0	1	0	0	0	0	0	0	0	0	0	0	0	0	0	0	0	1	0	0	0	0	1	0	0	0	0	0	0	0	0	0	0	0
Bacteria;Actinobacteria;Actinobacteria;Bifidobacteriales;Bifidobacteriaceae;Scardovia;	4	0	0	0	0	0	0	0	0	1	0	0	0	0	0	0	0	0	0	0	0	0	0	0	0	0	1	0	0	0	0	0	0	2	0	0	0	0	0	0	0
Bacteria;Bacteroidetes;Bacteroidia;Chitinophagales;Chitinophagaceae;Chitinophagaceae_unclassified;	4	0	0	0	0	0	1	0	0	0	1	0	0	0	0	0	0	0	0	0	0	0	0	0	1	0	0	0	0	1	0	0	0	0	0	0	0	0	0	0	0
Bacteria;Firmicutes;Clostridia;Clostridiales;Family_XI;Peptoniphilus;	4	0	0	0	0	0	0	0	0	0	0	0	0	0	2	0	0	0	0	0	0	0	0	0	1	0	0	0	1	0	0	0	0	0	0	0	0	0	0	0	0
Bacteria;Firmicutes;Negativicutes;Selenomonadales;Selenomonadales_unclassified;Selenomonadales_unclassified;	4	0	0	0	0	0	0	0	0	0	0	0	0	0	0	0	0	0	0	0	0	0	0	0	0	0	0	0	0	0	0	0	0	0	0	3	0	0	0	1	0
Bacteria;Gemmatimonadetes;Gemmatimonadetes;Gemmatimonadales;Gemmatimonadaceae;uncultured;	4	0	0	0	0	0	0	0	1	1	1	0	0	0	0	0	0	0	0	0	0	0	0	0	0	0	0	0	0	0	0	1	0	0	0	0	0	0	0	0	0
unknown;unknown_unclassified;unknown_unclassified;unknown_unclassified;unknown_unclassified;unknown_unclassified;	4	0	0	0	0	0	0	0	0	0	0	0	0	0	0	0	0	0	0	0	0	0	0	0	0	0	0	0	0	0	0	0	1	0	0	0	0	1	0	2	0
Bacteria;Acidobacteria;Acidobacteria_unclassified;Acidobacteria_unclassified;Acidobacteria_unclassified;Acidobacteria_unclassified;	3	1	0	0	0	0	0	0	0	0	0	2	0	0	0	0	0	0	0	0	0	0	0	0	0	0	0	0	0	0	0	0	0	0	0	0	0	0	0	0	0
Bacteria;Actinobacteria;Actinobacteria;Bifidobacteriales;Bifidobacteriaceae;Bifidobacteriaceae_unclassified;	3	0	0	0	2	0	0	0	0	0	0	0	0	0	0	0	0	0	0	0	0	0	0	0	0	0	0	0	0	0	0	0	0	0	1	0	0	0	0	0	0
Bacteria;Bacteroidetes;Bacteroidia;Bacteroidales;Prevotellaceae;Prevotella;	3	0	0	0	0	0	0	0	0	0	0	0	0	0	0	0	0	0	0	0	0	0	0	0	1	0	0	0	0	0	0	0	0	0	1	0	1	0	0	0	0
Bacteria;Bacteroidetes;Bacteroidia;Cytophagales;Spirosomaceae;Arcicella;	3	0	0	0	0	0	0	0	0	2	0	0	0	0	0	0	0	0	0	0	0	0	0	0	0	0	0	0	0	0	1	0	0	0	0	0	0	0	0	0	0
Bacteria;Bacteroidetes;Bacteroidia;Sphingobacteriales;env.OPS_17;env.OPS_17_ge;	3	0	0	0	0	0	0	0	1	0	0	0	0	0	0	0	0	0	2	0	0	0	0	0	0	0	0	0	0	0	0	0	0	0	0	0	0	0	0	0	0
Bacteria;Firmicutes;Clostridia;Clostridiales;Clostridiaceae_1;Clostridium_sensu_stricto_12;	3	0	0	0	0	0	0	0	0	1	1	0	1	0	0	0	0	0	0	0	0	0	0	0	0	0	0	0	0	0	0	0	0	0	0	0	0	0	0	0	0
Bacteria;Firmicutes;Clostridia;Clostridiales;Lachnospiraceae;Herbinix;	3	0	0	0	0	0	0	0	3	0	0	0	0	0	0	0	0	0	0	0	0	0	0	0	0	0	0	0	0	0	0	0	0	0	0	0	0	0	0	0	0
Bacteria;Firmicutes;Clostridia;Clostridiales;Lachnospiraceae;Lachnoanaerobaculum;	3	0	0	0	0	0	0	1	0	0	0	0	0	2	0	0	0	0	0	0	0	0	0	0	0	0	0	0	0	0	0	0	0	0	0	0	0	0	0	0	0
Bacteria;Firmicutes;Clostridia;Clostridiales;Ruminococcaceae;Hydrogenoanaerobacterium;	3	0	0	0	0	2	0	0	0	0	0	0	0	0	0	0	1	0	0	0	0	0	0	0	0	0	0	0	0	0	0	0	0	0	0	0	0	0	0	0	0
Bacteria;Planctomycetes;Planctomycetacia;Pirellulales;Pirellulaceae;Pirellula;	3	1	0	0	0	0	0	0	1	0	0	0	0	0	0	0	0	0	0	0	0	0	1	0	0	0	0	0	0	0	0	0	0	0	0	0	0	0	0	0	0
Bacteria;Proteobacteria;Alphaproteobacteria;Caulobacterales;Caulobacteraceae;Brevundimonas;	3	0	0	0	0	0	0	3	0	0	0	0	0	0	0	0	0	0	0	0	0	0	0	0	0	0	0	0	0	0	0	0	0	0	0	0	0	0	0	0	0
Bacteria;Proteobacteria;Alphaproteobacteria;Sphingomonadales;Sphingomonadaceae;Novosphingobium;	3	0	0	0	1	0	0	0	0	0	0	0	0	0	0	0	0	0	0	0	1	0	0	0	0	0	0	0	0	1	0	0	0	0	0	0	0	0	0	0	0
Bacteria;Proteobacteria;Gammaproteobacteria;Xanthomonadales;Xanthomonadaceae;Arenimonas;	3	1	1	0	0	0	0	0	0	0	0	1	0	0	0	0	0	0	0	0	0	0	0	0	0	0	0	0	0	0	0	0	0	0	0	0	0	0	0	0	0
Bacteria;Proteobacteria;Gammaproteobacteria;Xanthomonadales;Xanthomonadaceae;Xanthomonadaceae_unclassified;	3	1	0	0	0	0	0	0	2	0	0	0	0	0	0	0	0	0	0	0	0	0	0	0	0	0	0	0	0	0	0	0	0	0	0	0	0	0	0	0	0
Bacteria;Actinobacteria;Actinobacteria;Micrococcales;Micrococcaceae;Arthrobacter;	2	0	0	0	0	0	1	0	0	0	0	0	0	0	0	0	0	0	0	0	0	0	0	0	0	0	0	0	0	0	0	0	1	0	0	0	0	0	0	0	0
Bacteria;Actinobacteria;Actinobacteria;Micrococcales;Micrococcales_unclassified;Micrococcales_unclassified;	2	0	0	0	0	0	0	0	0	0	1	0	0	0	0	0	0	0	0	0	1	0	0	0	0	0	0	0	0	0	0	0	0	0	0	0	0	0	0	0	0
Bacteria;Actinobacteria;Coriobacteriia;Coriobacteriales;Atopobiaceae;Olsenella;	2	0	0	0	1	0	0	0	0	0	1	0	0	0	0	0	0	0	0	0	0	0	0	0	0	0	0	0	0	0	0	0	0	0	0	0	0	0	0	0	0
Bacteria;Bacteroidetes;Bacteroidia;Bacteroidales;Porphyromonadaceae;Porphyromonas;	2	0	0	0	0	0	0	0	0	0	0	0	1	0	0	0	0	0	0	0	0	0	0	0	1	0	0	0	0	0	0	0	0	0	0	0	0	0	0	0	0
Bacteria;Bacteroidetes;Bacteroidia;Cytophagales;Microscillaceae;uncultured;	2	0	1	0	1	0	0	0	0	0	0	0	0	0	0	0	0	0	0	0	0	0	0	0	0	0	0	0	0	0	0	0	0	0	0	0	0	0	0	0	0
Bacteria;Firmicutes;Bacilli;Bacilli_unclassified;Bacilli_unclassified;Bacilli_unclassified;	2	0	0	0	0	0	0	0	0	0	0	0	0	0	2	0	0	0	0	0	0	0	0	0	0	0	0	0	0	0	0	0	0	0	0	0	0	0	0	0	0
Bacteria;Firmicutes;Bacilli;Lactobacillales;Enterococcaceae;Enterococcaceae_unclassified;	2	0	0	0	0	0	1	0	0	0	1	0	0	0	0	0	0	0	0	0	0	0	0	0	0	0	0	0	0	0	0	0	0	0	0	0	0	0	0	0	0
Bacteria;Firmicutes;Clostridia;Clostridiales;Family_XI;Family_XI_unclassified;	2	0	0	0	0	0	0	0	0	0	0	0	0	0	0	0	0	0	0	0	0	1	0	0	0	0	0	0	0	0	0	0	0	0	0	0	0	0	0	0	1
Bacteria;Firmicutes;Clostridia;Clostridiales;Peptostreptococcaceae;Clostridioides;	2	0	0	0	0	0	0	0	0	0	0	0	0	0	0	0	0	0	0	0	0	0	0	0	1	0	0	0	0	0	0	1	0	0	0	0	0	0	0	0	0
Bacteria;Firmicutes;Negativicutes;Selenomonadales;Acidaminococcaceae;uncultured;	2	0	0	0	0	0	0	0	0	0	0	0	0	0	0	0	0	0	0	0	0	0	0	0	0	0	0	0	0	0	0	0	0	0	0	0	0	0	0	2	0
Bacteria;Firmicutes;Negativicutes;Selenomonadales;Veillonellaceae;Selenomonas_4;	2	0	0	0	0	1	0	0	0	0	1	0	0	0	0	0	0	0	0	0	0	0	0	0	0	0	0	0	0	0	0	0	0	0	0	0	0	0	0	0	0
Bacteria;Patescibacteria;Gracilibacteria;JGI_0000069-P22;JGI_0000069-P22_fa;JGI_0000069-P22_ge;	2	0	0	0	0	0	0	0	2	0	0	0	0	0	0	0	0	0	0	0	0	0	0	0	0	0	0	0	0	0	0	0	0	0	0	0	0	0	0	0	0
Bacteria;Patescibacteria;Parcubacteria;Parcubacteria_unclassified;Parcubacteria_unclassified;Parcubacteria_unclassified;	2	0	0	0	0	0	0	0	0	0	0	0	0	0	0	0	0	0	0	0	0	0	0	0	2	0	0	0	0	0	0	0	0	0	0	0	0	0	0	0	0
Bacteria;Patescibacteria;Saccharimonadia;Saccharimonadales;Saccharimonadaceae;Candidatus_Saccharimonas;	2	0	0	0	0	0	0	0	1	0	1	0	0	0	0	0	0	0	0	0	0	0	0	0	0	0	0	0	0	0	0	0	0	0	0	0	0	0	0	0	0
Bacteria;Planctomycetes;Planctomycetacia;Gemmatales;Gemmataceae;Gemmata;	2	0	0	0	0	0	0	0	0	0	0	0	0	0	0	0	0	0	0	0	0	0	0	0	0	0	0	0	0	1	1	0	0	0	0	0	0	0	0	0	0
Bacteria;Planctomycetes;Planctomycetacia;Planctomycetales;uncultured;uncultured_ge;	2	0	0	0	0	0	0	0	0	0	0	0	0	0	0	0	0	0	0	0	0	0	0	0	1	0	0	0	0	0	1	0	0	0	0	0	0	0	0	0	0
Bacteria;Proteobacteria;Alphaproteobacteria;Rhizobiales;Beijerinckiaceae;Bosea;	2	0	0	0	0	0	0	2	0	0	0	0	0	0	0	0	0	0	0	0	0	0	0	0	0	0	0	0	0	0	0	0	0	0	0	0	0	0	0	0	0
Bacteria;Proteobacteria;Alphaproteobacteria;Rhizobiales;Devosiaceae;Devosia;	2	1	0	0	0	0	0	0	0	0	0	0	0	1	0	0	0	0	0	0	0	0	0	0	0	0	0	0	0	0	0	0	0	0	0	0	0	0	0	0	0
Bacteria;Proteobacteria;Alphaproteobacteria;Rhodobacterales;Rhodobacteraceae;Rhodobacter;	2	0	0	0	0	0	0	0	2	0	0	0	0	0	0	0	0	0	0	0	0	0	0	0	0	0	0	0	0	0	0	0	0	0	0	0	0	0	0	0	0
Bacteria;Proteobacteria;Alphaproteobacteria;Rhodobacterales;Rhodobacteraceae;Rhodobacteraceae_unclassified;	2	0	0	0	0	0	0	0	0	0	1	0	0	0	0	0	0	0	0	0	0	0	0	0	0	0	0	0	0	0	1	0	0	0	0	0	0	0	0	0	0
Bacteria;Proteobacteria;Alphaproteobacteria;Sphingomonadales;Sphingomonadaceae;Sphingorhabdus;	2	0	1	0	0	0	1	0	0	0	0	0	0	0	0	0	0	0	0	0	0	0	0	0	0	0	0	0	0	0	0	0	0	0	0	0	0	0	0	0	0
Bacteria;Proteobacteria;Deltaproteobacteria;Deltaproteobacteria_unclassified;Deltaproteobacteria_unclassified;Deltaproteobacteria_unclassified;	2	0	0	0	0	0	0	0	1	0	0	0	0	0	0	0	0	0	0	0	0	0	0	0	0	0	0	0	0	0	0	0	0	0	0	0	0	1	0	0	0
Bacteria;Proteobacteria;Deltaproteobacteria;Desulfovibrionales;Desulfovibrionales_unclassified;Desulfovibrionales_unclassified;	2	0	0	0	0	0	0	0	0	0	0	0	1	0	0	1	0	0	0	0	0	0	0	0	0	0	0	0	0	0	0	0	0	0	0	0	0	0	0	0	0
Bacteria;Proteobacteria;Gammaproteobacteria;Aeromonadales;Aeromonadaceae;Aeromonas;	2	0	0	0	0	0	0	0	2	0	0	0	0	0	0	0	0	0	0	0	0	0	0	0	0	0	0	0	0	0	0	0	0	0	0	0	0	0	0	0	0
Bacteria;Proteobacteria;Gammaproteobacteria;Betaproteobacteriales;Burkholderiaceae;Delftia;	2	0	0	0	0	1	0	0	0	0	0	0	0	0	0	0	0	0	0	0	0	0	0	0	0	0	0	0	0	0	1	0	0	0	0	0	0	0	0	0	0
Bacteria;Proteobacteria;Gammaproteobacteria;Betaproteobacteriales;Methylophilaceae;Methylotenera;	2	1	0	0	0	0	0	0	0	0	0	0	0	0	0	0	0	0	0	0	0	0	0	0	0	0	0	0	0	0	0	1	0	0	0	0	0	0	0	0	0
Bacteria;Proteobacteria;Gammaproteobacteria;Betaproteobacteriales;Nitrosomonadaceae;MND1;	2	0	0	0	0	0	0	0	0	0	0	1	0	0	1	0	0	0	0	0	0	0	0	0	0	0	0	0	0	0	0	0	0	0	0	0	0	0	0	0	0
Bacteria;Proteobacteria;Gammaproteobacteria;Betaproteobacteriales;TRA3-20;TRA3-20_ge;	2	0	0	0	0	0	0	1	0	0	0	0	0	0	0	0	1	0	0	0	0	0	0	0	0	0	0	0	0	0	0	0	0	0	0	0	0	0	0	0	0
Bacteria;Proteobacteria;Gammaproteobacteria;Pasteurellales;Pasteurellaceae;Aggregatibacter;	2	0	0	0	0	0	0	0	0	0	0	1	0	0	0	0	0	0	0	0	0	0	0	0	0	0	0	0	0	0	0	0	1	0	0	0	0	0	0	0	0
Bacteria;Proteobacteria;Gammaproteobacteria;Pseudomonadales;Moraxellaceae;Psychrobacter;	2	0	0	0	0	0	0	0	0	0	2	0	0	0	0	0	0	0	0	0	0	0	0	0	0	0	0	0	0	0	0	0	0	0	0	0	0	0	0	0	0
Bacteria;Verrucomicrobia;Verrucomicrobiae;Opitutales;Puniceicoccaceae;Puniceicoccaceae_unclassified;	2	0	1	0	0	0	0	0	0	0	0	0	0	0	0	0	0	0	0	0	0	0	0	0	0	0	0	1	0	0	0	0	0	0	0	0	0	0	0	0	0
Bacteria;Verrucomicrobia;Verrucomicrobiae;Pedosphaerales;Pedosphaeraceae;Pedosphaeraceae_unclassified;	2	0	1	0	0	0	0	0	0	0	0	0	0	0	0	0	0	0	0	0	0	0	0	0	1	0	0	0	0	0	0	0	0	0	0	0	0	0	0	0	0
Bacteria;Acidobacteria;Acidobacteriia;Solibacterales;Solibacteraceae_(Subgroup_3);Bryobacter;	1	0	0	0	0	0	0	0	0	0	0	0	0	0	0	0	0	0	0	0	0	0	0	0	0	0	0	0	0	0	1	0	0	0	0	0	0	0	0	0	0
Bacteria;Acidobacteria;Blastocatellia_(Subgroup_4);Blastocatellales;Blastocatellaceae;Blastocatellaceae_unclassified;	1	0	0	0	0	0	0	0	0	0	1	0	0	0	0	0	0	0	0	0	0	0	0	0	0	0	0	0	0	0	0	0	0	0	0	0	0	0	0	0	0
Bacteria;Acidobacteria;Blastocatellia_(Subgroup_4);Blastocatellales;Blastocatellaceae;JGI_0001001-H03;	1	0	0	0	0	0	1	0	0	0	0	0	0	0	0	0	0	0	0	0	0	0	0	0	0	0	0	0	0	0	0	0	0	0	0	0	0	0	0	0	0
Bacteria;Acidobacteria;Blastocatellia_(Subgroup_4);Pyrinomonadales;Pyrinomonadaceae;RB41;	1	0	0	0	0	0	0	0	0	0	0	0	0	0	0	0	0	0	1	0	0	0	0	0	0	0	0	0	0	0	0	0	0	0	0	0	0	0	0	0	0
Bacteria;Acidobacteria;Subgroup_5;Subgroup_5_or;Subgroup_5_fa;Subgroup_5_ge;	1	0	0	0	1	0	0	0	0	0	0	0	0	0	0	0	0	0	0	0	0	0	0	0	0	0	0	0	0	0	0	0	0	0	0	0	0	0	0	0	0
Bacteria;Acidobacteria;Subgroup_6;Subgroup_6_or;Subgroup_6_fa;Subgroup_6_ge;	1	0	0	0	0	0	0	0	0	0	0	0	0	0	0	0	0	0	0	0	0	0	0	0	0	0	0	0	0	0	0	1	0	0	0	0	0	0	0	0	0
Bacteria;Actinobacteria;Acidimicrobiia;Acidimicrobiia_unclassified;Acidimicrobiia_unclassified;Acidimicrobiia_unclassified;	1	0	0	0	0	0	0	0	0	0	0	0	0	0	0	0	0	0	0	0	0	0	0	0	0	0	0	0	0	0	1	0	0	0	0	0	0	0	0	0	0
Bacteria;Actinobacteria;Actinobacteria;Micrococcales;Cellulomonadaceae;Tropheryma;	1	0	0	0	0	0	0	0	0	0	0	0	0	0	0	0	0	0	0	0	0	0	0	0	0	0	1	0	0	0	0	0	0	0	0	0	0	0	0	0	0
Bacteria;Actinobacteria;Actinobacteria;Micrococcales;Intrasporangiaceae;Tetrasphaera;	1	0	0	0	0	0	0	0	1	0	0	0	0	0	0	0	0	0	0	0	0	0	0	0	0	0	0	0	0	0	0	0	0	0	0	0	0	0	0	0	0
Bacteria;Actinobacteria;Actinobacteria;Micrococcales;Microbacteriaceae;Microbacteriaceae_unclassified;	1	0	0	0	0	0	0	0	0	0	0	0	1	0	0	0	0	0	0	0	0	0	0	0	0	0	0	0	0	0	0	0	0	0	0	0	0	0	0	0	0
Bacteria;Actinobacteria;Coriobacteriia;Coriobacteriales;Atopobiaceae;Atopobium;	1	0	0	0	0	0	0	0	0	0	0	0	0	0	0	0	0	0	0	0	0	0	0	0	1	0	0	0	0	0	0	0	0	0	0	0	0	0	0	0	0
Bacteria;Bacteroidetes;Bacteroidia;Bacteroidales;Dysgonomonadaceae;Dysgonomonadaceae_unclassified;	1	0	0	0	0	0	0	0	0	0	0	0	0	0	0	0	0	0	0	0	0	0	0	0	0	0	0	0	0	0	0	0	0	0	0	0	0	0	0	1	0
Bacteria;Bacteroidetes;Bacteroidia;Bacteroidales;Prevotellaceae;Prevotella_1;	1	0	0	0	0	0	0	0	0	0	0	0	0	0	0	0	0	0	0	0	0	1	0	0	0	0	0	0	0	0	0	0	0	0	0	0	0	0	0	0	0
Bacteria;Bacteroidetes;Bacteroidia;Bacteroidales;Tannerellaceae;Candidatus_Vestibaculum;	1	0	1	0	0	0	0	0	0	0	0	0	0	0	0	0	0	0	0	0	0	0	0	0	0	0	0	0	0	0	0	0	0	0	0	0	0	0	0	0	0
Bacteria;Bacteroidetes;Bacteroidia;Chitinophagales;Chitinophagaceae;Ferruginibacter;	1	0	0	0	0	0	0	0	0	0	0	0	0	0	0	0	0	0	0	0	0	0	0	0	0	0	0	0	0	1	0	0	0	0	0	0	0	0	0	0	0
Bacteria;Bacteroidetes;Bacteroidia;Cytophagales;Spirosomaceae;Emticicia;	1	0	0	0	0	0	0	0	1	0	0	0	0	0	0	0	0	0	0	0	0	0	0	0	0	0	0	0	0	0	0	0	0	0	0	0	0	0	0	0	0
Bacteria;Bacteroidetes;Bacteroidia;Flavobacteriales;Weeksellaceae;Chryseobacterium;	1	0	0	0	0	0	0	0	0	0	1	0	0	0	0	0	0	0	0	0	0	0	0	0	0	0	0	0	0	0	0	0	0	0	0	0	0	0	0	0	0
Bacteria;Bacteroidetes;Bacteroidia;Sphingobacteriales;Sphingobacteriaceae;Pedobacter;	1	0	0	0	0	0	0	0	0	0	0	0	0	0	0	0	0	0	0	0	0	0	0	0	0	0	0	0	0	0	0	1	0	0	0	0	0	0	0	0	0
Bacteria;Chloroflexi;Anaerolineae;Anaerolineales;Anaerolineaceae;Flexilinea;	1	0	0	0	0	0	0	0	0	0	0	0	0	0	0	0	0	0	0	0	0	0	0	0	0	0	0	0	1	0	0	0	0	0	0	0	0	0	0	0	0
Bacteria;Chloroflexi;Chloroflexi_unclassified;Chloroflexi_unclassified;Chloroflexi_unclassified;Chloroflexi_unclassified;	1	0	0	0	0	0	0	0	0	0	0	0	0	0	1	0	0	0	0	0	0	0	0	0	0	0	0	0	0	0	0	0	0	0	0	0	0	0	0	0	0
Bacteria;Cyanobacteria;Oxyphotobacteria;Oxyphotobacteria_unclassified;Oxyphotobacteria_unclassified;Oxyphotobacteria_unclassified;	1	0	0	0	0	0	0	0	0	0	0	0	0	0	0	0	0	0	0	0	0	0	0	0	0	0	0	1	0	0	0	0	0	0	0	0	0	0	0	0	0
Bacteria;Firmicutes;Bacilli;Lactobacillales;Carnobacteriaceae;Trichococcus;	1	0	0	0	0	0	0	1	0	0	0	0	0	0	0	0	0	0	0	0	0	0	0	0	0	0	0	0	0	0	0	0	0	0	0	0	0	0	0	0	0
Bacteria;Firmicutes;Bacilli;Lactobacillales;Lactobacillaceae;Pediococcus;	1	0	0	0	0	0	0	0	0	0	0	0	0	0	0	0	0	0	0	0	0	0	0	1	0	0	0	0	0	0	0	0	0	0	0	0	0	0	0	0	0
Bacteria;Firmicutes;Clostridia;Clostridiales;Clostridiaceae_1;Sarcina;	1	0	0	0	0	0	0	0	0	0	0	0	0	0	0	1	0	0	0	0	0	0	0	0	0	0	0	0	0	0	0	0	0	0	0	0	0	0	0	0	0
Bacteria;Firmicutes;Clostridia;Clostridiales;Family_XI;Anaerococcus;	1	0	0	0	0	0	0	0	0	0	0	0	0	0	0	0	0	0	0	0	0	0	0	0	1	0	0	0	0	0	0	0	0	0	0	0	0	0	0	0	0
Bacteria;Firmicutes;Clostridia;Clostridiales;Lachnospiraceae;Cellulosilyticum;	1	0	0	0	0	0	0	0	0	1	0	0	0	0	0	0	0	0	0	0	0	0	0	0	0	0	0	0	0	0	0	0	0	0	0	0	0	0	0	0	0
Bacteria;Firmicutes;Clostridia;Clostridiales;Lachnospiraceae;FD2005;	1	0	0	0	0	0	0	0	0	0	0	0	0	0	1	0	0	0	0	0	0	0	0	0	0	0	0	0	0	0	0	0	0	0	0	0	0	0	0	0	0
Bacteria;Firmicutes;Clostridia;Clostridiales;Lachnospiraceae;Lachnoclostridium_5;	1	0	0	0	1	0	0	0	0	0	0	0	0	0	0	0	0	0	0	0	0	0	0	0	0	0	0	0	0	0	0	0	0	0	0	0	0	0	0	0	0
Bacteria;Firmicutes;Clostridia;Clostridiales;Lachnospiraceae;Lachnospiraceae_NK4A136_group;	1	0	0	0	0	0	0	0	0	0	0	0	0	0	0	0	0	0	0	0	0	0	0	0	0	0	0	1	0	0	0	0	0	0	0	0	0	0	0	0	0
Bacteria;Firmicutes;Clostridia;Clostridiales;Ruminococcaceae;Caproiciproducens;	1	0	0	0	0	0	0	0	0	0	0	0	0	0	0	0	0	0	0	0	1	0	0	0	0	0	0	0	0	0	0	0	0	0	0	0	0	0	0	0	0
Bacteria;Omnitrophicaeota;Omnitrophicaeota_cl;Omnitrophicaeota_or;Omnitrophicaeota_fa;Omnitrophicaeota_ge;	1	0	0	0	1	0	0	0	0	0	0	0	0	0	0	0	0	0	0	0	0	0	0	0	0	0	0	0	0	0	0	0	0	0	0	0	0	0	0	0	0
Bacteria;Planctomycetes;Phycisphaerae;Tepidisphaerales;WD2101_soil_group;WD2101_soil_group_ge;	1	0	0	0	0	0	0	1	0	0	0	0	0	0	0	0	0	0	0	0	0	0	0	0	0	0	0	0	0	0	0	0	0	0	0	0	0	0	0	0	0
Bacteria;Planctomycetes;Planctomycetacia;Gemmatales;Gemmataceae;Gemmataceae_unclassified;	1	0	0	0	0	0	0	0	0	1	0	0	0	0	0	0	0	0	0	0	0	0	0	0	0	0	0	0	0	0	0	0	0	0	0	0	0	0	0	0	0
Bacteria;Planctomycetes;Planctomycetacia;Pirellulales;Pirellulaceae;Pirellulaceae_unclassified;	1	0	0	0	0	0	0	0	0	1	0	0	0	0	0	0	0	0	0	0	0	0	0	0	0	0	0	0	0	0	0	0	0	0	0	0	0	0	0	0	0
Bacteria;Planctomycetes;Planctomycetes_unclassified;Planctomycetes_unclassified;Planctomycetes_unclassified;Planctomycetes_unclassified;	1	0	1	0	0	0	0	0	0	0	0	0	0	0	0	0	0	0	0	0	0	0	0	0	0	0	0	0	0	0	0	0	0	0	0	0	0	0	0	0	0
Bacteria;Proteobacteria;Alphaproteobacteria;Rhizobiales;Beijerinckiaceae;Beijerinckiaceae_unclassified;	1	0	0	0	0	0	0	0	0	0	0	0	0	0	0	0	0	0	0	0	0	0	0	0	0	0	0	0	0	0	0	1	0	0	0	0	0	0	0	0	0
Bacteria;Proteobacteria;Alphaproteobacteria;Rhizobiales;Hyphomicrobiaceae;Hyphomicrobium;	1	0	0	0	0	0	0	0	0	0	0	0	0	0	0	0	0	0	0	0	0	0	0	0	0	0	0	1	0	0	0	0	0	0	0	0	0	0	0	0	0
Bacteria;Proteobacteria;Alphaproteobacteria;Rhizobiales;Rhizobiales_Incertae_Sedis;uncultured;	1	0	0	0	0	0	0	0	0	0	0	0	0	0	0	0	0	1	0	0	0	0	0	0	0	0	0	0	0	0	0	0	0	0	0	0	0	0	0	0	0
Bacteria;Proteobacteria;Alphaproteobacteria;Rhizobiales;Rhizobiales_unclassified;Rhizobiales_unclassified;	1	0	0	0	0	0	0	0	0	0	0	0	0	0	0	0	0	0	0	0	0	0	0	0	0	0	0	0	0	1	0	0	0	0	0	0	0	0	0	0	0
Bacteria;Proteobacteria;Alphaproteobacteria;Rhizobiales;Xanthobacteraceae;Xanthobacteraceae_unclassified;	1	0	0	0	1	0	0	0	0	0	0	0	0	0	0	0	0	0	0	0	0	0	0	0	0	0	0	0	0	0	0	0	0	0	0	0	0	0	0	0	0
Bacteria;Proteobacteria;Alphaproteobacteria;Rhizobiales;Xanthobacteraceae;uncultured;	1	0	0	0	0	0	0	0	1	0	0	0	0	0	0	0	0	0	0	0	0	0	0	0	0	0	0	0	0	0	0	0	0	0	0	0	0	0	0	0	0
Bacteria;Proteobacteria;Alphaproteobacteria;Rhodobacterales;Rhodobacteraceae;uncultured;	1	0	0	0	0	1	0	0	0	0	0	0	0	0	0	0	0	0	0	0	0	0	0	0	0	0	0	0	0	0	0	0	0	0	0	0	0	0	0	0	0
Bacteria;Proteobacteria;Alphaproteobacteria;Sneathiellales;Sneathiellaceae;uncultured;	1	0	0	0	0	0	0	1	0	0	0	0	0	0	0	0	0	0	0	0	0	0	0	0	0	0	0	0	0	0	0	0	0	0	0	0	0	0	0	0	0
Bacteria;Proteobacteria;Alphaproteobacteria;Sphingomonadales;Sphingomonadaceae;Sphingomonas;	1	0	0	0	0	0	0	1	0	0	0	0	0	0	0	0	0	0	0	0	0	0	0	0	0	0	0	0	0	0	0	0	0	0	0	0	0	0	0	0	0
Bacteria;Proteobacteria;Alphaproteobacteria;Sphingomonadales;Sphingomonadaceae;Sphingopyxis;	1	0	0	0	0	0	0	1	0	0	0	0	0	0	0	0	0	0	0	0	0	0	0	0	0	0	0	0	0	0	0	0	0	0	0	0	0	0	0	0	0
Bacteria;Proteobacteria;Deltaproteobacteria;Desulfarculales;Desulfarculaceae;uncultured;	1	0	0	0	1	0	0	0	0	0	0	0	0	0	0	0	0	0	0	0	0	0	0	0	0	0	0	0	0	0	0	0	0	0	0	0	0	0	0	0	0
Bacteria;Proteobacteria;Deltaproteobacteria;Myxococcales;Myxococcales_unclassified;Myxococcales_unclassified;	1	0	0	0	0	0	0	0	0	0	0	1	0	0	0	0	0	0	0	0	0	0	0	0	0	0	0	0	0	0	0	0	0	0	0	0	0	0	0	0	0
Bacteria;Proteobacteria;Deltaproteobacteria;RCP2-54;RCP2-54_fa;RCP2-54_ge;	1	1	0	0	0	0	0	0	0	0	0	0	0	0	0	0	0	0	0	0	0	0	0	0	0	0	0	0	0	0	0	0	0	0	0	0	0	0	0	0	0
Bacteria;Proteobacteria;Gammaproteobacteria;Betaproteobacteriales;Burkholderiaceae;Aquabacterium;	1	0	0	0	0	0	0	0	0	0	0	0	0	0	0	0	0	0	0	0	0	0	1	0	0	0	0	0	0	0	0	0	0	0	0	0	0	0	0	0	0
Bacteria;Proteobacteria;Gammaproteobacteria;Betaproteobacteriales;Burkholderiaceae;Diaphorobacter;	1	0	0	0	0	0	0	0	1	0	0	0	0	0	0	0	0	0	0	0	0	0	0	0	0	0	0	0	0	0	0	0	0	0	0	0	0	0	0	0	0
Bacteria;Proteobacteria;Gammaproteobacteria;Betaproteobacteriales;Burkholderiaceae;Massilia;	1	0	0	0	0	0	0	1	0	0	0	0	0	0	0	0	0	0	0	0	0	0	0	0	0	0	0	0	0	0	0	0	0	0	0	0	0	0	0	0	0
Bacteria;Proteobacteria;Gammaproteobacteria;Betaproteobacteriales;Burkholderiaceae;Polaromonas;	1	0	0	0	0	0	0	0	0	0	0	0	0	0	0	0	0	0	0	0	0	0	0	0	0	0	0	0	0	1	0	0	0	0	0	0	0	0	0	0	0
Bacteria;Proteobacteria;Gammaproteobacteria;Betaproteobacteriales;Burkholderiaceae;Schlegelella;	1	0	0	0	0	0	0	0	0	0	0	0	0	0	0	0	0	0	0	0	0	0	1	0	0	0	0	0	0	0	0	0	0	0	0	0	0	0	0	0	0
Bacteria;Proteobacteria;Gammaproteobacteria;Betaproteobacteriales;Nitrosomonadaceae;IS-44;	1	0	0	0	0	0	0	0	0	0	0	1	0	0	0	0	0	0	0	0	0	0	0	0	0	0	0	0	0	0	0	0	0	0	0	0	0	0	0	0	0
Bacteria;Proteobacteria;Gammaproteobacteria;Betaproteobacteriales;Nitrosomonadaceae;Nitrosospira;	1	0	0	0	0	0	0	0	0	0	1	0	0	0	0	0	0	0	0	0	0	0	0	0	0	0	0	0	0	0	0	0	0	0	0	0	0	0	0	0	0
Bacteria;Proteobacteria;Gammaproteobacteria;Betaproteobacteriales;SC-I-84;SC-I-84_ge;	1	0	0	0	0	0	0	0	0	0	0	0	0	1	0	0	0	0	0	0	0	0	0	0	0	0	0	0	0	0	0	0	0	0	0	0	0	0	0	0	0
Bacteria;Proteobacteria;Gammaproteobacteria;Oceanospirillales;Halomonadaceae;Cobetia;	1	0	1	0	0	0	0	0	0	0	0	0	0	0	0	0	0	0	0	0	0	0	0	0	0	0	0	0	0	0	0	0	0	0	0	0	0	0	0	0	0
Bacteria;Proteobacteria;Gammaproteobacteria;Xanthomonadales;Xanthomonadaceae;Stenotrophomonas;	1	0	0	0	0	0	0	0	0	0	0	0	0	0	0	0	0	0	0	0	0	0	0	0	0	0	0	0	0	0	0	0	1	0	0	0	0	0	0	0	0
Bacteria;Proteobacteria;Gammaproteobacteria;Xanthomonadales;Xanthomonadales_unclassified;Xanthomonadales_unclassified;	1	0	0	0	0	0	0	0	0	0	0	0	0	0	0	0	0	0	0	0	0	0	0	0	0	0	1	0	0	0	0	0	0	0	0	0	0	0	0	0	0
Bacteria;Synergistetes;Synergistia;Synergistales;Synergistaceae;Fretibacterium;	1	0	0	0	0	0	0	0	0	0	0	0	0	0	0	0	0	0	0	0	0	0	0	0	0	0	0	0	0	0	0	0	1	0	0	0	0	0	0	0	0
Bacteria;Synergistetes;Synergistia;Synergistales;Synergistaceae;uncultured;	1	0	0	0	0	0	0	0	0	0	0	0	0	0	0	0	0	0	0	0	0	0	0	0	0	0	0	0	0	0	0	0	0	0	1	0	0	0	0	0	0
Bacteria;Verrucomicrobia;Verrucomicrobiae;Pedosphaerales;Pedosphaeraceae;Pedosphaeraceae_ge;	1	0	0	0	0	0	0	0	0	0	0	0	0	0	0	0	0	0	0	0	0	0	0	0	0	0	0	0	0	0	0	1	0	0	0	0	0	0	0	0	0

## Sheet: otus99-uparse_linux
taxonomy	total	A003	A014	A018	A036	A042	A056	A063	A070	A080	A081	A093	A131	A139	A140	A147	A157	A160	A167	A169	A174	A181	A190	A215	A224	A235	A239	A243	A244	A258	A260	A262	C023	C035	C059	C072	C089	C114	C145	C146	C209
Root	3164847	140977	122082	138048	176726	52113	82183	96301	141747	24623	105898	107599	64287	36117	57652	75010	30807	55293	91871	100877	141283	111612	101766	114589	104644	27587	126967	126719	76481	89814	36797	155884	105179	13036	17261	29003	13762	15918	14725	15344	26265
Bacteria;Bacteroidetes;Bacteroidia;Bacteroidales;Bacteroidaceae;Bacteroides;	721361	5889	6135	30594	52315	15699	2893	1745	11169	6216	51543	17843	17863	123	7920	12239	9593	19004	13727	40257	16026	34356	32422	10708	12837	4230	26729	33231	25458	43839	13614	70551	23276	616	2483	4265	8494	7206	8568	5371	14314
Bacteria;Firmicutes;Clostridia;Clostridiales;Lachnospiraceae;Lachnospiraceae_unclassified;	207543	4985	6535	3541	8529	3666	18	5629	8489	2702	12469	8597	4494	4394	6048	6096	1422	4355	8936	16290	4793	3365	4267	10025	7561	903	3204	9373	3812	4314	1639	21586	5246	285	1359	3210	1105	1140	584	827	1750
Bacteria;Bacteroidetes;Bacteroidia;Bacteroidales;Rikenellaceae;Alistipes;	176578	12453	826	19178	20070	7128	5	208	10859	1065	5	7042	5978	17	1483	2849	2346	627	964	4275	11115	7300	7107	8371	5049	1581	11707	7146	2966	3	2078	2584	4136	1639	1296	1484	312	249	334	516	2227
Bacteria;Firmicutes;Clostridia;Clostridiales;Ruminococcaceae;Faecalibacterium;	167527	7411	3179	3098	5343	3699	2	440	5818	2900	12	3021	4276	1596	4435	4103	778	4413	5988	3214	6965	10730	12187	8091	4657	3357	231	11337	3855	11969	2294	15878	5021	224	552	3684	607	0	884	1278	0
Bacteria;Bacteroidetes;Bacteroidia;Bacteroidales;Bacteroidales_unclassified;Bacteroidales_unclassified;	154750	6749	2728	13524	13856	615	179	185	32634	981	1	7558	1961	1	1228	4278	815	1284	119	131	4557	9191	5472	8001	4893	1027	3994	4041	3132	2439	344	9506	4694	312	1321	188	317	1175	110	488	721
Bacteria;Firmicutes;Clostridia;Clostridiales;Ruminococcaceae;Ruminococcaceae_unclassified;	121610	3847	2896	2735	2661	1536	19	16091	4535	1215	458	14236	2985	185	1749	3869	668	1323	1415	1682	8747	3522	1706	5852	12751	1084	3998	4020	2013	790	1117	1855	3391	3059	1654	507	159	640	284	257	99
Bacteria;Bacteroidetes;Bacteroidia;Bacteroidales;Prevotellaceae;Prevotella_7;	78440	25768	33804	4	2	3	0	358	0	0	0	0	0	2	1532	1	0	1	1	1	9897	1	0	404	2215	256	1	0	1	0	0	0	0	0	1	4187	0	0	0	0	0
Bacteria;Bacteria_unclassified;Bacteria_unclassified;Bacteria_unclassified;Bacteria_unclassified;Bacteria_unclassified;	77199	4863	4094	344	1770	180	27371	2	481	500	160	468	441	0	1260	1686	37	23	53	5	4710	526	172	2004	81	14	1071	5110	92	102	54	0	17771	13	349	1283	59	0	6	5	39
Bacteria;Firmicutes;Clostridia;Clostridiales;Lachnospiraceae;uncultured;	75764	2392	1822	2598	1975	744	2	558	3230	1842	2161	1765	2309	2145	2862	2321	110	354	3247	5582	1349	533	2771	3022	1303	682	6020	7748	5515	899	719	874	2537	90	525	862	989	209	424	153	521
Bacteria;Firmicutes;Clostridia;Clostridiales;Ruminococcaceae;Subdoligranulum;	73600	2364	883	5728	4	1453	0	3710	2546	48	1	4493	952	1079	1063	2510	1075	1153	2694	736	5264	3063	3782	886	3463	1431	4364	3141	1573	3604	372	2919	3738	0	766	617	193	254	335	282	1061
Bacteria;Firmicutes;Clostridia;Clostridiales;Ruminococcaceae;CAG-352;	73586	618	452	3151	5731	650	16	12123	764	293	1108	3320	317	386	1	1155	787	816	597	2215	2504	1461	481	4301	2140	558	15338	560	2164	5885	1563	12	649	198	209	158	0	285	115	221	284
Bacteria;Firmicutes;Clostridia;Clostridiales;Ruminococcaceae;Ruminococcaceae_ge;	62420	1108	2431	2879	1411	661	24	23820	1147	2	1565	5	296	1540	274	531	182	178	10671	1101	4855	1370	1	451	955	133	1348	177	183	133	145	591	191	443	680	236	44	251	20	362	25
Bacteria;Firmicutes;Clostridia;Clostridiales;Ruminococcaceae;Ruminococcus_1;	57958	234	1995	12804	2361	921	0	34	467	0	3921	942	430	3	424	2796	3856	1155	3507	1782	3367	967	533	491	2545	131	774	3027	526	2	251	1	4751	141	519	273	2	328	11	1612	74
Bacteria;Firmicutes;Clostridia;Clostridiales;Lachnospiraceae;Blautia;	57031	2301	540	2856	3202	222	53	4551	525	381	1357	1656	702	5305	697	431	729	1005	1758	527	2579	2227	1960	1506	1392	286	4112	1275	1026	4394	499	3718	655	155	356	396	255	509	192	106	635
Bacteria;Bacteroidetes;Bacteroidia;Bacteroidales;Prevotellaceae;Prevotellaceae_unclassified;	53938	7802	1621	3	5	3	57	1953	9955	7	31	1	5	10	10102	898	1	2	2	2	11114	4	2	4684	2599	369	4	1646	0	3	1	5	3	0	563	480	0	1	0	0	0
Bacteria;Proteobacteria;Alphaproteobacteria;Alphaproteobacteria_unclassified;Alphaproteobacteria_unclassified;Alphaproteobacteria_unclassified;	53028	6844	860	457	0	0	0	9	4072	1910	0	336	793	15	974	4458	1	0	4	2515	1	0	184	9327	118	13	207	4048	2277	0	1464	0	10495	12	0	21	0	83	0	0	1530
Bacteria;Firmicutes;Clostridia;Clostridiales;Lachnospiraceae;Agathobacter;	47483	3458	831	4	2	1698	0	370	512	365	4	962	3311	1991	280	687	3	6030	6864	6	1076	5339	453	362	324	101	4300	1109	3502	4	77	9	629	101	319	724	32	566	632	446	0
Bacteria;Firmicutes;Clostridia;Clostridiales;Ruminococcaceae;Ruminococcaceae_UCG-002;	47032	2629	826	2582	1745	1227	0	1151	3727	1	0	1110	763	2	1127	439	179	78	503	755	4202	2426	179	2336	6231	836	3883	427	2068	23	1781	822	778	175	507	1139	15	258	33	69	0
Bacteria;Verrucomicrobia;Verrucomicrobiae;Verrucomicrobiales;Verrucomicrobiaceae;uncultured;	44915	777	19	129	7209	10	18138	0	2211	4	2	833	257	140	38	634	0	187	2693	178	617	2	2	32	1629	70	6497	8	930	49	36	3	983	1	164	2	0	350	0	0	81
Bacteria;Firmicutes;Clostridia;Clostridiales;Lachnospiraceae;Roseburia;	41328	970	837	408	333	220	0	316	1251	119	5797	1457	512	102	382	751	214	5271	1334	1381	447	1072	791	556	725	369	1390	2796	3997	1	1479	2704	1160	82	164	531	317	159	708	165	60
Bacteria;Firmicutes;Clostridia;Clostridiales;Ruminococcaceae;Ruminococcaceae_UCG-014;	40401	3239	2386	4814	82	20	2	1154	2962	83	1	4168	385	2	564	2048	3	33	193	0	2762	46	1777	2879	4789	1154	2151	1229	850	7	221	3	2	22	361	0	0	8	0	0	1
Bacteria;Firmicutes;Clostridia;Clostridiales;Christensenellaceae;Christensenellaceae_R-7_group;	38643	913	559	2506	103	973	3	39	1388	48	0	830	2829	0	1015	2260	35	6	4484	888	1033	1471	3	648	7320	419	248	5442	430	0	4	92	2396	41	162	48	0	0	1	2	4
Bacteria;Bacteroidetes;Bacteroidia;Bacteroidales;Tannerellaceae;Parabacteroides;	38154	1641	112	2007	1	686	1364	67	508	621	0	1713	684	8	336	911	648	1066	263	1806	931	1603	3806	1696	277	63	3328	1472	515	2758	972	3809	1083	50	70	69	0	163	111	287	649
Bacteria;Bacteroidetes;Bacteroidia;Bacteroidales;Tannerellaceae;Tannerellaceae_unclassified;	37876	6	4157	2609	10204	636	0	133	3623	51	0	0	1262	21	143	479	404	1	400	0	1941	732	2583	567	330	300	1894	2	1289	0	184	1	2641	113	190	105	0	630	0	245	0
Bacteria;Firmicutes;Clostridia;Clostridiales;Lachnospiraceae;Fusicatenibacter;	35544	460	176	858	2645	356	2	344	1078	127	1358	858	623	731	147	2054	0	683	3504	5144	657	2258	3015	481	560	506	259	613	587	1	263	2452	810	325	340	372	253	0	139	136	369
Bacteria;Proteobacteria;Gammaproteobacteria;Betaproteobacteriales;Burkholderiaceae;Burkholderiaceae_unclassified;	33388	5502	2036	112	300	15	0	94	3709	561	0	0	1424	205	1304	26	1	2	186	82	1040	3177	4860	3427	147	147	863	0	0	0	714	0	2958	29	44	0	0	362	5	56	0
Bacteria;Firmicutes;Negativicutes;Selenomonadales;Acidaminococcaceae;Phascolarctobacterium;	32353	863	2142	2237	0	95	3176	90	1	514	0	9068	2373	0	0	84	13	0	2230	5513	574	28	0	291	1489	0	2	1	151	0	210	0	633	66	108	18	56	0	114	1	212
Bacteria;Proteobacteria;Gammaproteobacteria;Betaproteobacteriales;Burkholderiaceae;Parasutterella;	30927	0	3	30	13192	746	3	0	0	0	0	2396	31	1	3	797	725	2065	582	0	95	0	794	4	12	0	1	759	699	1175	0	5876	0	13	59	324	120	0	0	35	387
Bacteria;Actinobacteria;Actinobacteria;Bifidobacteriales;Bifidobacteriaceae;Bifidobacterium;	24408	76	133	1321	515	680	16	2269	44	0	2897	1738	16	1161	21	444	898	170	4433	0	1440	2086	131	14	1006	0	1639	142	89	3	4	339	34	625	6	0	0	0	0	6	12
Bacteria;Proteobacteria;Gammaproteobacteria;Enterobacteriales;Enterobacteriaceae;Escherichia-Shigella;	23087	1	2	180	139	16	2041	99	26	813	174	1628	1341	28	9	23	3	11	20	2	7457	262	0	30	203	39	20	236	1892	4342	1300	3	3	3	0	1	3	4	6	725	2
Bacteria;Firmicutes;Erysipelotrichia;Erysipelotrichales;Erysipelotrichaceae;Erysipelotrichaceae_unclassified;	21978	193	96	715	178	27	0	7407	17	17	0	1446	356	3634	484	18	8	14	1495	908	28	313	468	196	359	62	1310	158	104	389	41	1355	50	0	13	35	67	3	4	10	0
Bacteria;Firmicutes;Clostridia;Clostridiales;Ruminococcaceae;Ruminiclostridium_6;	21262	6480	204	101	1283	306	12	11	2650	0	0	923	0	1	312	0	0	0	1	0	19	1	0	6857	75	278	0	0	0	0	830	13	0	374	39	11	0	3	1	2	475
Bacteria;Bacteroidetes;Bacteroidia;Bacteroidales;Muribaculaceae;Muribaculaceae_ge;	20705	4	386	434	4	695	1	201	9	9	0	0	11	11	7	2269	2245	0	412	4	425	5483	6	512	9	137	1958	4045	1	11	5	5	3	384	105	0	0	295	545	74	0
Bacteria;Firmicutes;Clostridia;Clostridiales;Lachnospiraceae;Lachnoclostridium;	19747	987	251	307	302	228	0	2360	314	182	1072	143	144	4288	670	255	98	33	511	216	1735	958	111	128	570	107	502	115	208	957	137	638	239	190	100	112	35	37	9	334	164
Bacteria;Firmicutes;Negativicutes;Selenomonadales;Veillonellaceae;Veillonella;	17738	29	4	11	10	417	2	50	89	53	15018	26	13	27	402	74	0	325	16	35	1	43	39	19	35	1	19	76	8	56	1	627	16	88	1	0	0	3	0	87	17
Bacteria;Firmicutes;Negativicutes;Selenomonadales;Veillonellaceae;Dialister;	17598	1294	0	0	5615	133	91	0	287	0	223	0	0	0	486	0	3	0	0	0	0	579	132	313	1	821	5820	159	288	59	3	1249	0	1	0	0	0	40	1	0	0
Bacteria;Firmicutes;Bacilli;Lactobacillales;Streptococcaceae;Streptococcus;	16778	84	113	87	36	32	10136	159	79	19	648	16	41	57	2183	663	16	374	529	89	26	229	33	9	77	12	49	665	10	32	44	34	12	65	0	7	1	9	1	79	23
Bacteria;Bacteroidetes;Bacteroidia;Bacteroidales;Prevotellaceae;Prevotellaceae_UCG-003;	15946	1748	476	0	1	241	0	41	4001	0	0	1	0	0	674	1223	361	2	2027	2	729	0	2572	1193	320	334	0	0	0	0	0	0	0	0	0	0	0	0	0	0	0
Bacteria;Firmicutes;Clostridia;Clostridiales;Ruminococcaceae;Ruminococcaceae_UCG-005;	15493	1476	826	369	203	815	12	111	1223	6	0	311	444	15	316	812	8	18	54	143	1595	173	46	1879	1757	307	24	490	298	37	568	72	332	92	385	192	1	7	6	40	30
Bacteria;Bacteroidetes;Bacteroidia;Bacteroidales;Marinifilaceae;Odoribacter;	13976	845	174	1433	0	205	0	73	1123	0	0	1470	745	0	218	312	170	0	106	417	1302	863	727	317	368	181	290	1314	558	0	125	0	172	0	12	80	111	119	0	80	66
Bacteria;Firmicutes;Clostridia;Clostridiales;Lachnospiraceae;Lachnospiraceae_ge;	13745	231	368	640	891	60	0	1235	53	35	98	422	232	881	619	180	412	0	1183	0	511	234	593	124	369	538	454	179	512	0	41	140	166	70	273	1817	9	54	20	6	95
Bacteria;Actinobacteria;Coriobacteriia;Coriobacteriales;Coriobacteriaceae;Collinsella;	13137	985	194	102	20	133	0	1641	83	3	0	81	0	1491	236	87	99	462	596	0	1445	548	253	90	2948	62	1165	138	135	0	7	43	43	28	10	1	0	0	5	3	0
Bacteria;Firmicutes;Clostridia;Clostridiales;Ruminococcaceae;Ruminococcaceae_UCG-010;	12886	770	1865	1040	34	35	0	8	2094	0	0	262	223	0	173	116	13	35	1	66	1478	0	0	556	450	102	0	3208	3	0	25	0	249	28	31	4	0	0	0	17	0
Bacteria;Firmicutes;Clostridia;Clostridiales;Ruminococcaceae;Oscillospira;	12330	333	488	135	423	61	0	8	1040	134	0	648	241	10	810	131	26	498	211	37	146	349	1398	1260	85	148	43	919	474	3	68	923	457	167	234	133	56	91	72	39	31
Bacteria;Bacteroidetes;Bacteroidia;Bacteroidales;Rikenellaceae;Rikenellaceae_RC9_gut_group;	11710	0	8527	1	0	1	0	1	3030	1	0	0	0	0	0	0	0	0	0	0	0	0	0	5	9	135	0	0	0	0	0	0	0	0	0	0	0	0	0	0	0
Bacteria;Firmicutes;Clostridia;Clostridiales;Ruminococcaceae;Flavonifractor;	11557	412	95	356	1087	115	2	170	163	101	1890	169	100	102	160	301	48	384	160	548	508	600	301	205	303	140	726	295	176	212	28	733	135	345	93	35	28	123	139	24	45
Bacteria;Firmicutes;Clostridia;Clostridiales;Lachnospiraceae;Butyrivibrio;	10648	0	6885	0	0	0	0	0	0	0	0	0	0	0	0	0	0	0	0	0	0	0	0	0	312	3450	1	0	0	0	0	0	0	0	0	0	0	0	0	0	0
Bacteria;Firmicutes;Clostridia;Clostridiales;Clostridiales_unclassified;Clostridiales_unclassified;	10490	1834	606	652	337	395	61	95	535	5	6	165	63	6	28	569	11	15	6	43	341	95	3	2161	362	48	84	661	39	3	28	4	479	597	41	37	0	0	10	15	50
Bacteria;Firmicutes;Clostridia;Clostridiales;Lachnospiraceae;Coprococcus_2;	9743	1355	725	1834	386	3	0	0	373	0	3	728	675	0	125	216	0	273	0	0	356	0	0	268	706	34	845	0	1	0	0	0	595	0	199	0	0	0	43	0	0
Bacteria;Proteobacteria;Gammaproteobacteria;Enterobacteriales;Enterobacteriaceae;Enterobacteriaceae_unclassified;	9477	118	0	0	196	0	6994	0	14	2	3	0	2	0	273	6	0	14	0	0	0	0	1	80	388	1	13	111	0	1	518	0	314	0	0	0	0	0	0	428	0
Bacteria;Bacteroidetes;Bacteroidia;Bacteroidales;Prevotellaceae;Alloprevotella;	9285	1	6843	1	5	0	4	5	6	0	3	2	0	2	0	2	0	0	1	0	3	3	0	2379	3	0	3	2	0	3	3	4	3	3	0	0	0	0	0	1	0
Bacteria;Firmicutes;Clostridia;Clostridiales;Christensenellaceae;Christensenellaceae_unclassified;	8967	250	60	2492	3	785	0	12	799	0	0	84	68	0	77	227	10	1	5	2	2356	95	0	279	901	246	43	105	6	0	1	0	0	2	38	4	0	0	6	4	6
Bacteria;Proteobacteria;Deltaproteobacteria;Desulfovibrionales;Desulfovibrionaceae;Bilophila;	8364	395	56	90	2978	35	156	6	464	55	0	0	64	10	143	336	139	147	27	418	272	74	592	153	62	4	286	146	258	266	265	0	92	21	88	84	41	49	43	23	26
Bacteria;Proteobacteria;Deltaproteobacteria;Desulfovibrionales;Desulfovibrionaceae;Desulfovibrio;	7774	142	335	563	1151	195	38	282	44	0	0	176	7	0	165	424	0	0	226	0	502	110	0	706	132	0	336	193	657	0	9	1	14	1144	14	192	0	0	0	9	7
Bacteria;Proteobacteria;Gammaproteobacteria;Enterobacteriales;Enterobacteriaceae;Klebsiella;	7609	42	0	0	0	0	7332	1	0	0	1	1	0	0	0	0	0	5	0	0	0	0	0	223	0	0	0	0	0	0	0	0	4	0	0	0	0	0	0	0	0
Bacteria;Firmicutes;Negativicutes;Selenomonadales;Acidaminococcaceae;Acidaminococcaceae_unclassified;	7391	0	1	0	0	370	0	110	0	0	0	0	0	123	2	2953	1008	437	0	0	0	0	2065	0	0	0	0	0	0	0	0	0	0	45	0	195	0	0	25	57	0
Bacteria;Tenericutes;Mollicutes;Mollicutes_unclassified;Mollicutes_unclassified;Mollicutes_unclassified;	7027	0	3189	92	305	0	0	1	2816	1	0	1	0	0	21	1	1	2	0	0	1	1	0	588	0	0	0	1	0	2	2	1	0	0	0	0	0	0	0	0	1
Bacteria;Actinobacteria;Coriobacteriia;Coriobacteriales;Eggerthellaceae;Eggerthella;	5786	386	64	266	111	26	0	948	38	24	71	174	27	1498	99	59	49	31	62	80	232	44	109	102	652	43	127	42	80	98	5	182	8	28	7	5	1	8	0	0	0
Bacteria;Firmicutes;Clostridia;Clostridiales;Ruminococcaceae;Butyricicoccus;	5605	88	26	252	307	105	0	175	25	43	68	251	79	643	237	78	49	113	682	286	280	77	43	37	40	48	76	119	135	123	53	702	47	26	58	52	20	37	79	33	13
Bacteria;Firmicutes;Clostridia;Clostridiales;Lachnospiraceae;Tyzzerella;	5414	161	33	94	17	13	0	13	52	14	0	400	24	18	204	269	2	139	280	902	83	85	392	536	48	118	318	405	211	121	80	27	128	22	16	46	23	85	2	4	29
Bacteria;Firmicutes;Firmicutes_unclassified;Firmicutes_unclassified;Firmicutes_unclassified;Firmicutes_unclassified;	5290	1301	123	974	223	493	0	16	774	0	0	28	3	0	6	136	1	0	0	0	618	70	17	68	19	3	18	253	3	0	3	0	0	56	12	71	0	0	0	1	0
Bacteria;Firmicutes;Clostridia;Clostridiales;Peptostreptococcaceae;Peptostreptococcaceae_unclassified;	4997	251	496	17	110	36	11	133	145	39	127	3	89	2	21	67	10	77	28	72	118	198	0	5	923	7	172	131	58	1	3	1528	96	18	0	0	4	0	1	0	0
Bacteria;Firmicutes;Clostridia;Clostridiales;Ruminococcaceae;Ruminococcaceae_NK4A214_group;	4794	66	117	115	1377	83	16	102	49	7	0	269	15	0	37	8	14	0	20	0	173	104	0	123	151	15	759	124	130	0	45	0	105	95	119	508	0	0	4	7	37
Bacteria;Cyanobacteria;Oxyphotobacteria;Chloroplast;Chloroplast_fa;Chloroplast_ge;	3776	2	9	2	1849	0	5	0	5	7	7	0	1	6	10	28	1	109	632	7	38	0	12	46	2	0	2	865	1	2	2	2	0	33	52	26	1	9	1	0	2
Bacteria;Firmicutes;Erysipelotrichia;Erysipelotrichales;Erysipelotrichaceae;Faecalitalea;	3582	895	270	34	46	1	10	1335	0	7	14	7	59	3	66	5	3	16	2	43	127	73	4	1	331	0	19	114	30	18	3	19	8	0	1	4	0	12	1	0	1
Bacteria;Firmicutes;Negativicutes;Selenomonadales;Veillonellaceae;Veillonellaceae_unclassified;	3511	0	17	0	0	0	34	22	2	0	1	0	0	854	0	244	0	0	0	0	2309	3	0	3	2	0	2	0	0	5	0	0	13	0	0	0	0	0	0	0	0
Bacteria;Firmicutes;Clostridia;Clostridiales;Family_XIII;Family_XIII_unclassified;	3313	76	58	99	57	30	784	179	75	5	0	50	23	0	13	45	68	23	37	36	47	65	55	29	94	8	1198	47	8	10	6	18	11	16	11	10	0	2	6	2	12
Bacteria;Firmicutes;Clostridia;Clostridiales;Ruminococcaceae;Caproiciproducens;	3065	61	269	93	186	87	1	96	53	4	133	88	40	139	85	46	109	66	252	175	141	180	109	28	89	36	126	74	52	22	48	20	33	26	21	4	1	8	19	26	19
Bacteria;Firmicutes;Clostridia;Clostridiales;Clostridiaceae_1;Clostridiaceae_1_unclassified;	2536	349	326	32	3	23	6	29	21	131	10	1	67	0	4	6	0	2	0	2	77	102	21	4	448	6	18	7	43	0	20	757	0	5	0	0	13	0	0	3	0
Bacteria;Firmicutes;Clostridia;Clostridiales;Lachnospiraceae;Dorea;	2480	50	20	33	67	48	0	490	22	41	22	49	13	452	77	39	0	0	93	138	94	40	23	28	175	5	0	33	104	82	27	93	29	4	11	25	7	24	5	0	17
Bacteria;Firmicutes;Clostridia;Clostridiales;Lachnospiraceae;Coprococcus_1;	2356	110	44	303	1	47	0	242	46	0	0	140	40	130	24	37	0	0	171	0	96	132	27	56	198	4	79	19	38	117	30	46	96	0	18	49	0	13	0	3	0
Bacteria;Proteobacteria;Gammaproteobacteria;Pasteurellales;Pasteurellaceae;Pasteurellaceae_unclassified;	1804	86	1	0	0	1	0	0	303	7	542	24	42	1	82	167	0	66	13	0	4	180	2	5	5	0	1	19	10	62	4	73	92	2	0	0	1	0	1	6	2
Bacteria;Actinobacteria;Coriobacteriia;Coriobacteriales;Coriobacteriales_unclassified;Coriobacteriales_unclassified;	1684	1	5	138	0	48	0	39	22	0	0	49	15	0	81	86	35	0	282	6	116	0	0	104	345	5	1	198	18	0	0	0	38	21	11	14	0	6	0	0	0
Bacteria;Firmicutes;Clostridia;Clostridia_unclassified;Clostridia_unclassified;Clostridia_unclassified;	1615	412	59	233	135	101	0	0	94	0	0	48	26	0	10	56	0	0	0	0	211	0	0	34	43	0	0	55	36	0	0	0	0	21	19	0	0	0	0	3	19
Bacteria;Firmicutes;Erysipelotrichia;Erysipelotrichales;Erysipelotrichaceae;Erysipelatoclostridium;	1583	0	3	280	54	4	0	34	15	21	50	212	135	5	6	55	41	159	37	18	0	32	11	24	31	4	7	79	35	30	4	121	44	12	1	0	1	9	0	0	9
Bacteria;Cyanobacteria;Melainabacteria;Gastranaerophilales;Gastranaerophilales_fa;Gastranaerophilales_ge;	1579	0	926	0	0	0	0	0	0	0	0	0	0	0	0	0	0	0	0	0	0	0	0	653	0	0	0	0	0	0	0	0	0	0	0	0	0	0	0	0	0
Bacteria;Firmicutes;Clostridia;Clostridiales;Lachnospiraceae;Tyzzerella_3;	1553	0	0	0	146	0	0	11	0	0	0	0	0	433	0	17	0	0	207	0	0	0	116	0	0	0	60	0	45	312	110	0	61	0	35	0	0	0	0	0	0
Bacteria;Firmicutes;Bacilli;Lactobacillales;Lactobacillaceae;Lactobacillus;	1509	2	6	32	17	644	73	8	15	0	7	9	9	2	13	18	11	31	6	0	76	9	3	50	13	5	27	376	8	5	7	12	6	4	0	1	1	1	1	1	0
[truncated: 53 more rows]

## Sheet: otus99-uparse_mac
taxonomy	total	A003	A014	A018	A036	A042	A056	A063	A070	A080	A081	A093	A131	A139	A140	A147	A157	A160	A167	A169	A174	A181	A190	A215	A224	A235	A239	A243	A244	A258	A260	A262	C023	C035	C059	C072	C089	C114	C145	C146	C209
[truncated: 135 more rows]
